# Supplementary material for: Abstract, emotional and concrete concepts and the activation of mouth-hand effectors
Source: PeerJ. 2018 Dec 7;6:e5987. doi: 10.7717/peerj.5987 (PMC6287580; doi:10.7717/peerj.5987)
Supplement: Supplemental Information 1 [file peerj-06-5987-s001.xlsx]

## Sheet: Experiment1
Subject	effector	Task	concept	stimulus	accuracy	RT	freq	n.lett	CNC	CNCSd	IMG	IMGSd	FAM	FAMSd	AoA	AoASd	CA	CASd	ABS	ABSSd	MoA	MoASd
1	hand	1	3	abbandono	0	906	91	9	297	1.55	300	1.73	397	1.79	374	1.52	413	1.71	455	1.93	505	1.65
1	hand	1	1	affermazione	0	598	59	12	274	1.85	265	1.76	516	1.38	424	1.09	376	1.86	375	1.61	425	1.56
1	mouth	1	3	agitazione	0	763	25	10	413	1.5	311	1.56	541	1.75	320	1.44	497	1.82	441	1.54	364	2.04
1	mouth	1	3	agonia	0	890	29	6	294	1.39	332	1.6	305	1.42	480	1.51	444	1.99	476	1.69	600	1.32
1	mouth	1	2	alghe	0	1077	24	5	669	0.62	657	0.73	422	1.93	269	0.6	641	1.48	121	0.54	225	1.34
1	hand	1	2	alveare	1		11	7	679	0.42	674	0.57	421	2.32	267	1.02	609	1.44	150	0.73	363	1.74
1	mouth	1	1	analogia	0	1082	8	8	206	1.34	327	1.79	418	1.55	539	0.95	313	2.1	517	1.55	620	1.2
1	hand	1	2	canoa	1		25	5	679	0.59	688	0.33	440	2.13	335	1.18	600	1.14	114	0.36	288	1.57
1	mouth	1	2	circo	0	584	43	5	616	1.16	660	0.74	453	1.83	228	0.63	626	0.92	179	0.88	205	1
1	mouth	1	1	circostanza	0	729	70	11	273	1.7	228	1.49	412	1.73	479	1.23	331	2.09	485	1.31	642	0.61
1	hand	1	1	concetto	0	692	118	8	168	0.99	224	1.5	509	1.69	426	0.92	315	2.06	635	1.3	544	1.71
1	hand	1	3	conflitto	0	458	140	9	304	1.25	348	1.81	416	2.19	444	1.15	432	1.87	424	1.1	553	1.39
1	mouth	1	2	cravatta	0	789	38	8	694	0.24	688	0.44	552	1.87	250	0.93	675	0.58	105	0.22	200	1.2
1	hand	1	3	disperazione	0	545	101	12	311	1.55	428	1.74	505	1.61	389	1.35	501	1.86	459	1.43	427	1.96
1	hand	1	2	elefante	0	781	36	8	669	0.6	695	0.23	482	1.77	210	0.79	618	1.45	100	0	296	1.9
1	mouth	1	3	emergenza	0	794	161	9	315	1.64	348	1.9	500	1.6	400	1.21	474	1.88	456	1.37	509	1.42
1	hand	1	2	falce	1		5	5	662	0.82	632	1.3	387	1.85	365	1.04	575	1.7	129	0.56	288	1.32
1	hand	1	3	fallimento	0	633	99	10	344	1.59	263	1.74	455	1.8	420	1.28	400	1.94	450	1.69	520	1.85
1	hand	1	1	fascino	0	562	149	7	246	1.56	430	1.33	495	1.75	475	1.18	476	1.83	535	1.28	550	1.44
1	hand	1	2	flotta	0	1038	35	6	600	1.2	644	0.75	442	1.71	330	0.95	582	1.66	163	0.72	375	1.9
1	mouth	1	3	fremito	1		11	7	335	1.79	312	1.84	273	1.33	516	1.26	304	2.03	390	1.95	600	1.44
1	mouth	1	1	funzione	0	651	185	8	273	1.33	274	1.97	414	1.34	420	1.64	341	1.89	465	1.86	592	1.5
1	hand	1	2	gallo	0	538	12	5	700	0	695	0.23	486	1.74	215	0.75	600	1.39	112	0.54	212	1.48
1	mouth	1	2	giraffa	0	794	1	7	681	0.49	674	0.69	463	2.39	181	0.54	644	1.42	106	0.24	306	1.78
1	mouth	1	3	giuramento	0	1010	13	10	309	1.5	344	1.91	393	1.44	400	1.12	417	1.76	400	1.9	553	1.21
1	hand	1	3	impulso	0	570	50	7	300	1.63	300	1.89	437	1.92	452	1.28	338	1.84	506	1	463	1.56
1	mouth	1	1	indiscrezione	0	1473	16	13	188	0.99	191	1.16	395	1.9	556	1.15	303	1.71	562	1.26	616	1.49
1	mouth	1	1	inefficienza	0	1020	17	12	245	1.3	274	1.56	418	1.87	521	1.14	345	1.88	515	1.69	563	1.71
1	mouth	1	1	inesperienza	0	1117	5	12	232	1.19	220	1.42	427	1.83	458	1.32	355	1.77	550	1.48	556	1.54
1	hand	1	1	insufficienza	0	1008	15	13	265	1.67	230	1.55	416	2.03	363	1.2	388	2.09	526	1.42	503	1.49
1	hand	1	3	ira	1		45	3	296	1.43	391	1.98	395	2.07	400	1.21	382	1.71	474	1.42	491	1.55
1	hand	1	1	logica	0	558	107	6	220	1.42	195	1.43	536	1.38	435	1.42	362	1.92	559	1.33	580	1.76
1	hand	1	1	merito	0	710	141	6	232	1.38	235	1.67	489	1.41	352	1.23	382	1.82	556	1.5	450	1.81
1	hand	1	2	minerale	0	623	9	8	627	0.88	538	1.46	447	1.71	396	1	505	2.09	174	1.08	388	1.26
1	hand	1	2	oca	1		29	3	685	0.54	700	0	468	2.21	150	0.52	659	1.08	106	0.24	197	1.33
1	hand	1	3	orrore	0	701	77	6	305	1.29	356	1.74	491	1.78	400	1.38	475	1.8	450	1.71	363	1.71
1	mouth	1	1	ozio	1		9	4	268	1.43	384	1.91	445	1.99	450	1.33	494	1.69	480	1.79	568	0.95
1	mouth	1	2	palude	0	1001	12	6	645	0.77	613	1.13	332	1.93	341	0.95	578	1.65	175	0.9	310	2.05
1	mouth	1	3	pericolo	0	685	250	8	323	1.5	361	1.85	511	1.85	231	0.7	506	1.77	394	1.37	397	1.51
1	hand	1	1	reputazione	0	548	27	11	215	1.01	213	1.39	411	1.76	569	0.95	282	1.85	594	1.2	619	1
1	hand	1	3	stupore	0	740	62	7	339	1.61	440	1.68	515	1.37	366	1.18	422	1.83	496	1.55	500	1.69
1	mouth	1	2	telegrafo	0	1118	3	9	614	1.46	556	1.44	321	1.75	438	1.28	455	2.35	153	1.24	531	1.25
1	mouth	1	1	tendenza	0	832	161	8	169	0.87	184	1.12	455	1.9	530	1.69	294	1.76	591	1.4	604	1.06
1	mouth	1	3	terrore	0	601	96	7	297	1.38	408	1.87	421	1.93	326	1.08	488	1.71	455	1.7	463	2.11
1	mouth	1	2	torre	0	1007	44	5	656	0.63	674	0.45	423	2.02	245	0.89	579	1.63	129	0.76	228	1.59
1	mouth	1	3	tradimento	0	809	73	10	363	1.2	300	1.83	464	2.05	415	1.18	485	1.88	418	1.49	432	2.04
1	mouth	1	2	trattore	0	918	2	8	685	0.44	672	0.74	482	2.11	209	0.75	669	0.6	105	0.22	216	1.68
1	hand	1	1	unanimità	0	666	37	8	241	1.46	308	2.1	306	1.6	512	1.25	369	1.62	545	1.73	632	1.11
2	hand	1	3	abbandono	1		91	9	297	1.55	300	1.73	397	1.79	374	1.52	413	1.71	455	1.93	505	1.65
2	hand	1	1	affermazione	0	759	59	12	274	1.85	265	1.76	516	1.38	424	1.09	376	1.86	375	1.61	425	1.56
2	mouth	1	3	agitazione	0	701	25	10	413	1.5	311	1.56	541	1.75	320	1.44	497	1.82	441	1.54	364	2.04
2	mouth	1	3	agonia	0	859	29	6	294	1.39	332	1.6	305	1.42	480	1.51	444	1.99	476	1.69	600	1.32
2	mouth	1	2	alghe	0	753	24	5	669	0.62	657	0.73	422	1.93	269	0.6	641	1.48	121	0.54	225	1.34
2	hand	1	2	alveare	1		11	7	679	0.42	674	0.57	421	2.32	267	1.02	609	1.44	150	0.73	363	1.74
2	mouth	1	1	analogia	0	950	8	8	206	1.34	327	1.79	418	1.55	539	0.95	313	2.1	517	1.55	620	1.2
2	hand	1	2	canoa	0	703	25	5	679	0.59	688	0.33	440	2.13	335	1.18	600	1.14	114	0.36	288	1.57
2	mouth	1	2	circo	0	600	43	5	616	1.16	660	0.74	453	1.83	228	0.63	626	0.92	179	0.88	205	1
2	mouth	1	1	circostanza	0	641	70	11	273	1.7	228	1.49	412	1.73	479	1.23	331	2.09	485	1.31	642	0.61
2	hand	1	1	concetto	0	516	118	8	168	0.99	224	1.5	509	1.69	426	0.92	315	2.06	635	1.3	544	1.71
2	hand	1	3	conflitto	0	832	140	9	304	1.25	348	1.81	416	2.19	444	1.15	432	1.87	424	1.1	553	1.39
2	mouth	1	2	cravatta	0	691	38	8	694	0.24	688	0.44	552	1.87	250	0.93	675	0.58	105	0.22	200	1.2
2	hand	1	3	disperazione	0	684	101	12	311	1.55	428	1.74	505	1.61	389	1.35	501	1.86	459	1.43	427	1.96
2	hand	1	2	elefante	0	805	36	8	669	0.6	695	0.23	482	1.77	210	0.79	618	1.45	100	0	296	1.9
2	mouth	1	3	emergenza	0	697	161	9	315	1.64	348	1.9	500	1.6	400	1.21	474	1.88	456	1.37	509	1.42
2	hand	1	2	falce	0	680	5	5	662	0.82	632	1.3	387	1.85	365	1.04	575	1.7	129	0.56	288	1.32
2	hand	1	3	fallimento	0	655	99	10	344	1.59	263	1.74	455	1.8	420	1.28	400	1.94	450	1.69	520	1.85
2	hand	1	1	fascino	0	629	149	7	246	1.56	430	1.33	495	1.75	475	1.18	476	1.83	535	1.28	550	1.44
2	hand	1	2	flotta	1		35	6	600	1.2	644	0.75	442	1.71	330	0.95	582	1.66	163	0.72	375	1.9
2	mouth	1	3	fremito	1		11	7	335	1.79	312	1.84	273	1.33	516	1.26	304	2.03	390	1.95	600	1.44
2	mouth	1	1	funzione	0	806	185	8	273	1.33	274	1.97	414	1.34	420	1.64	341	1.89	465	1.86	592	1.5
2	hand	1	2	gallo	0	761	12	5	700	0	695	0.23	486	1.74	215	0.75	600	1.39	112	0.54	212	1.48
2	mouth	1	2	giraffa	0	600	1	7	681	0.49	674	0.69	463	2.39	181	0.54	644	1.42	106	0.24	306	1.78
2	mouth	1	3	giuramento	0	771	13	10	309	1.5	344	1.91	393	1.44	400	1.12	417	1.76	400	1.9	553	1.21
2	hand	1	3	impulso	0	574	50	7	300	1.63	300	1.89	437	1.92	452	1.28	338	1.84	506	1	463	1.56
2	mouth	1	1	indiscrezione	0	1064	16	13	188	0.99	191	1.16	395	1.9	556	1.15	303	1.71	562	1.26	616	1.49
2	mouth	1	1	inefficienza	0	988	17	12	245	1.3	274	1.56	418	1.87	521	1.14	345	1.88	515	1.69	563	1.71
2	mouth	1	1	inesperienza	0	990	5	12	232	1.19	220	1.42	427	1.83	458	1.32	355	1.77	550	1.48	556	1.54
2	hand	1	1	insufficienza	1		15	13	265	1.67	230	1.55	416	2.03	363	1.2	388	2.09	526	1.42	503	1.49
2	hand	1	3	ira	1		45	3	296	1.43	391	1.98	395	2.07	400	1.21	382	1.71	474	1.42	491	1.55
2	hand	1	1	logica	0	586	107	6	220	1.42	195	1.43	536	1.38	435	1.42	362	1.92	559	1.33	580	1.76
2	hand	1	1	merito	0	568	141	6	232	1.38	235	1.67	489	1.41	352	1.23	382	1.82	556	1.5	450	1.81
2	hand	1	2	minerale	0	770	9	8	627	0.88	538	1.46	447	1.71	396	1	505	2.09	174	1.08	388	1.26
2	hand	1	2	oca	0	581	29	3	685	0.54	700	0	468	2.21	150	0.52	659	1.08	106	0.24	197	1.33
2	hand	1	3	orrore	1		77	6	305	1.29	356	1.74	491	1.78	400	1.38	475	1.8	450	1.71	363	1.71
2	mouth	1	1	ozio	0	673	9	4	268	1.43	384	1.91	445	1.99	450	1.33	494	1.69	480	1.79	568	0.95
2	mouth	1	2	palude	0	792	12	6	645	0.77	613	1.13	332	1.93	341	0.95	578	1.65	175	0.9	310	2.05
2	mouth	1	3	pericolo	0	748	250	8	323	1.5	361	1.85	511	1.85	231	0.7	506	1.77	394	1.37	397	1.51
2	hand	1	1	reputazione	1		27	11	215	1.01	213	1.39	411	1.76	569	0.95	282	1.85	594	1.2	619	1
2	hand	1	3	stupore	0	1234	62	7	339	1.61	440	1.68	515	1.37	366	1.18	422	1.83	496	1.55	500	1.69
2	mouth	1	2	telegrafo	0	889	3	9	614	1.46	556	1.44	321	1.75	438	1.28	455	2.35	153	1.24	531	1.25
2	mouth	1	1	tendenza	0	997	161	8	169	0.87	184	1.12	455	1.9	530	1.69	294	1.76	591	1.4	604	1.06
2	mouth	1	3	terrore	0	704	96	7	297	1.38	408	1.87	421	1.93	326	1.08	488	1.71	455	1.7	463	2.11
2	mouth	1	2	torre	0	665	44	5	656	0.63	674	0.45	423	2.02	245	0.89	579	1.63	129	0.76	228	1.59
2	mouth	1	3	tradimento	0	752	73	10	363	1.2	300	1.83	464	2.05	415	1.18	485	1.88	418	1.49	432	2.04
2	mouth	1	2	trattore	0	759	2	8	685	0.44	672	0.74	482	2.11	209	0.75	669	0.6	105	0.22	216	1.68
2	hand	1	1	unanimità	0	1074	37	8	241	1.46	308	2.1	306	1.6	512	1.25	369	1.62	545	1.73	632	1.11
3	mouth	1	3	abbandono	0	536	91	9	297	1.55	300	1.73	397	1.79	374	1.52	413	1.71	455	1.93	505	1.65
3	mouth	1	1	affermazione	0	593	59	12	274	1.85	265	1.76	516	1.38	424	1.09	376	1.86	375	1.61	425	1.56
3	hand	1	3	agitazione	0	517	25	10	413	1.5	311	1.56	541	1.75	320	1.44	497	1.82	441	1.54	364	2.04
3	hand	1	3	agonia	0	499	29	6	294	1.39	332	1.6	305	1.42	480	1.51	444	1.99	476	1.69	600	1.32
3	hand	1	2	alghe	0	671	24	5	669	0.62	657	0.73	422	1.93	269	0.6	641	1.48	121	0.54	225	1.34
3	mouth	1	2	alveare	0	575	11	7	679	0.42	674	0.57	421	2.32	267	1.02	609	1.44	150	0.73	363	1.74
3	hand	1	1	analogia	0	614	8	8	206	1.34	327	1.79	418	1.55	539	0.95	313	2.1	517	1.55	620	1.2
3	mouth	1	2	canoa	0	686	25	5	679	0.59	688	0.33	440	2.13	335	1.18	600	1.14	114	0.36	288	1.57
3	hand	1	2	circo	0	515	43	5	616	1.16	660	0.74	453	1.83	228	0.63	626	0.92	179	0.88	205	1
3	hand	1	1	circostanza	0	646	70	11	273	1.7	228	1.49	412	1.73	479	1.23	331	2.09	485	1.31	642	0.61
3	mouth	1	1	concetto	0	470	118	8	168	0.99	224	1.5	509	1.69	426	0.92	315	2.06	635	1.3	544	1.71
3	mouth	1	3	conflitto	0	510	140	9	304	1.25	348	1.81	416	2.19	444	1.15	432	1.87	424	1.1	553	1.39
3	hand	1	2	cravatta	0	993	38	8	694	0.24	688	0.44	552	1.87	250	0.93	675	0.58	105	0.22	200	1.2
3	mouth	1	3	disperazione	0	624	101	12	311	1.55	428	1.74	505	1.61	389	1.35	501	1.86	459	1.43	427	1.96
3	mouth	1	2	elefante	0	437	36	8	669	0.6	695	0.23	482	1.77	210	0.79	618	1.45	100	0	296	1.9
3	hand	1	3	emergenza	0	452	161	9	315	1.64	348	1.9	500	1.6	400	1.21	474	1.88	456	1.37	509	1.42
3	mouth	1	2	falce	0	753	5	5	662	0.82	632	1.3	387	1.85	365	1.04	575	1.7	129	0.56	288	1.32
3	mouth	1	3	fallimento	0	493	99	10	344	1.59	263	1.74	455	1.8	420	1.28	400	1.94	450	1.69	520	1.85
3	mouth	1	1	fascino	0	661	149	7	246	1.56	430	1.33	495	1.75	475	1.18	476	1.83	535	1.28	550	1.44
3	mouth	1	2	flotta	0	508	35	6	600	1.2	644	0.75	442	1.71	330	0.95	582	1.66	163	0.72	375	1.9
3	hand	1	3	fremito	0	568	11	7	335	1.79	312	1.84	273	1.33	516	1.26	304	2.03	390	1.95	600	1.44
3	hand	1	1	funzione	0	546	185	8	273	1.33	274	1.97	414	1.34	420	1.64	341	1.89	465	1.86	592	1.5
3	mouth	1	2	gallo	0	533	12	5	700	0	695	0.23	486	1.74	215	0.75	600	1.39	112	0.54	212	1.48
3	hand	1	2	giraffa	0	525	1	7	681	0.49	674	0.69	463	2.39	181	0.54	644	1.42	106	0.24	306	1.78
3	hand	1	3	giuramento	0	600	13	10	309	1.5	344	1.91	393	1.44	400	1.12	417	1.76	400	1.9	553	1.21
3	mouth	1	3	impulso	0	608	50	7	300	1.63	300	1.89	437	1.92	452	1.28	338	1.84	506	1	463	1.56
3	hand	1	1	indiscrezione	0	895	16	13	188	0.99	191	1.16	395	1.9	556	1.15	303	1.71	562	1.26	616	1.49
3	hand	1	1	inefficienza	0	1064	17	12	245	1.3	274	1.56	418	1.87	521	1.14	345	1.88	515	1.69	563	1.71
3	hand	1	1	inesperienza	1		5	12	232	1.19	220	1.42	427	1.83	458	1.32	355	1.77	550	1.48	556	1.54
3	mouth	1	1	insufficienza	0	838	15	13	265	1.67	230	1.55	416	2.03	363	1.2	388	2.09	526	1.42	503	1.49
3	mouth	1	3	ira	0	457	45	3	296	1.43	391	1.98	395	2.07	400	1.21	382	1.71	474	1.42	491	1.55
3	mouth	1	1	logica	0	412	107	6	220	1.42	195	1.43	536	1.38	435	1.42	362	1.92	559	1.33	580	1.76
3	mouth	1	1	merito	0	532	141	6	232	1.38	235	1.67	489	1.41	352	1.23	382	1.82	556	1.5	450	1.81
3	mouth	1	2	minerale	0	563	9	8	627	0.88	538	1.46	447	1.71	396	1	505	2.09	174	1.08	388	1.26
3	mouth	1	2	oca	0	514	29	3	685	0.54	700	0	468	2.21	150	0.52	659	1.08	106	0.24	197	1.33
3	mouth	1	3	orrore	0	433	77	6	305	1.29	356	1.74	491	1.78	400	1.38	475	1.8	450	1.71	363	1.71
3	hand	1	1	ozio	0	591	9	4	268	1.43	384	1.91	445	1.99	450	1.33	494	1.69	480	1.79	568	0.95
3	hand	1	2	palude	0	980	12	6	645	0.77	613	1.13	332	1.93	341	0.95	578	1.65	175	0.9	310	2.05
3	hand	1	3	pericolo	0	521	250	8	323	1.5	361	1.85	511	1.85	231	0.7	506	1.77	394	1.37	397	1.51
3	mouth	1	1	reputazione	0	507	27	11	215	1.01	213	1.39	411	1.76	569	0.95	282	1.85	594	1.2	619	1
3	mouth	1	3	stupore	0	424	62	7	339	1.61	440	1.68	515	1.37	366	1.18	422	1.83	496	1.55	500	1.69
3	hand	1	2	telegrafo	0	632	3	9	614	1.46	556	1.44	321	1.75	438	1.28	455	2.35	153	1.24	531	1.25
3	hand	1	1	tendenza	0	732	161	8	169	0.87	184	1.12	455	1.9	530	1.69	294	1.76	591	1.4	604	1.06
3	hand	1	3	terrore	0	506	96	7	297	1.38	408	1.87	421	1.93	326	1.08	488	1.71	455	1.7	463	2.11
3	hand	1	2	torre	0	445	44	5	656	0.63	674	0.45	423	2.02	245	0.89	579	1.63	129	0.76	228	1.59
3	hand	1	3	tradimento	0	529	73	10	363	1.2	300	1.83	464	2.05	415	1.18	485	1.88	418	1.49	432	2.04
3	hand	1	2	trattore	0	593	2	8	685	0.44	672	0.74	482	2.11	209	0.75	669	0.6	105	0.22	216	1.68
3	mouth	1	1	unanimità	0	864	37	8	241	1.46	308	2.1	306	1.6	512	1.25	369	1.62	545	1.73	632	1.11
4	mouth	1	3	abbandono	0	1318	91	9	297	1.55	300	1.73	397	1.79	374	1.52	413	1.71	455	1.93	505	1.65
4	mouth	1	1	affermazione	0	885	59	12	274	1.85	265	1.76	516	1.38	424	1.09	376	1.86	375	1.61	425	1.56
4	hand	1	3	agitazione	0	552	25	10	413	1.5	311	1.56	541	1.75	320	1.44	497	1.82	441	1.54	364	2.04
4	hand	1	3	agonia	0	573	29	6	294	1.39	332	1.6	305	1.42	480	1.51	444	1.99	476	1.69	600	1.32
4	hand	1	2	alghe	0	533	24	5	669	0.62	657	0.73	422	1.93	269	0.6	641	1.48	121	0.54	225	1.34
4	mouth	1	2	alveare	0	1299	11	7	679	0.42	674	0.57	421	2.32	267	1.02	609	1.44	150	0.73	363	1.74
4	hand	1	1	analogia	0	538	8	8	206	1.34	327	1.79	418	1.55	539	0.95	313	2.1	517	1.55	620	1.2
4	mouth	1	2	canoa	0	689	25	5	679	0.59	688	0.33	440	2.13	335	1.18	600	1.14	114	0.36	288	1.57
4	hand	1	2	circo	0	613	43	5	616	1.16	660	0.74	453	1.83	228	0.63	626	0.92	179	0.88	205	1
4	hand	1	1	circostanza	0	691	70	11	273	1.7	228	1.49	412	1.73	479	1.23	331	2.09	485	1.31	642	0.61
4	mouth	1	1	concetto	0	975	118	8	168	0.99	224	1.5	509	1.69	426	0.92	315	2.06	635	1.3	544	1.71
4	mouth	1	3	conflitto	0	818	140	9	304	1.25	348	1.81	416	2.19	444	1.15	432	1.87	424	1.1	553	1.39
4	hand	1	2	cravatta	0	534	38	8	694	0.24	688	0.44	552	1.87	250	0.93	675	0.58	105	0.22	200	1.2
4	mouth	1	3	disperazione	0	955	101	12	311	1.55	428	1.74	505	1.61	389	1.35	501	1.86	459	1.43	427	1.96
4	mouth	1	2	elefante	0	718	36	8	669	0.6	695	0.23	482	1.77	210	0.79	618	1.45	100	0	296	1.9
4	hand	1	3	emergenza	0	629	161	9	315	1.64	348	1.9	500	1.6	400	1.21	474	1.88	456	1.37	509	1.42
4	mouth	1	2	falce	0	1102	5	5	662	0.82	632	1.3	387	1.85	365	1.04	575	1.7	129	0.56	288	1.32
4	mouth	1	3	fallimento	0	731	99	10	344	1.59	263	1.74	455	1.8	420	1.28	400	1.94	450	1.69	520	1.85
4	mouth	1	1	fascino	0	818	149	7	246	1.56	430	1.33	495	1.75	475	1.18	476	1.83	535	1.28	550	1.44
4	mouth	1	2	flotta	0	766	35	6	600	1.2	644	0.75	442	1.71	330	0.95	582	1.66	163	0.72	375	1.9
4	hand	1	3	fremito	0	618	11	7	335	1.79	312	1.84	273	1.33	516	1.26	304	2.03	390	1.95	600	1.44
4	hand	1	1	funzione	0	657	185	8	273	1.33	274	1.97	414	1.34	420	1.64	341	1.89	465	1.86	592	1.5
4	mouth	1	2	gallo	0	838	12	5	700	0	695	0.23	486	1.74	215	0.75	600	1.39	112	0.54	212	1.48
4	hand	1	2	giraffa	0	572	1	7	681	0.49	674	0.69	463	2.39	181	0.54	644	1.42	106	0.24	306	1.78
4	hand	1	3	giuramento	0	672	13	10	309	1.5	344	1.91	393	1.44	400	1.12	417	1.76	400	1.9	553	1.21
4	mouth	1	3	impulso	0	1131	50	7	300	1.63	300	1.89	437	1.92	452	1.28	338	1.84	506	1	463	1.56
4	hand	1	1	indiscrezione	0	902	16	13	188	0.99	191	1.16	395	1.9	556	1.15	303	1.71	562	1.26	616	1.49
4	hand	1	1	inefficienza	0	728	17	12	245	1.3	274	1.56	418	1.87	521	1.14	345	1.88	515	1.69	563	1.71
4	hand	1	1	inesperienza	0	763	5	12	232	1.19	220	1.42	427	1.83	458	1.32	355	1.77	550	1.48	556	1.54
4	mouth	1	1	insufficienza	0	832	15	13	265	1.67	230	1.55	416	2.03	363	1.2	388	2.09	526	1.42	503	1.49
4	mouth	1	3	ira	0	736	45	3	296	1.43	391	1.98	395	2.07	400	1.21	382	1.71	474	1.42	491	1.55
4	mouth	1	1	logica	0	613	107	6	220	1.42	195	1.43	536	1.38	435	1.42	362	1.92	559	1.33	580	1.76
4	mouth	1	1	merito	0	1421	141	6	232	1.38	235	1.67	489	1.41	352	1.23	382	1.82	556	1.5	450	1.81
4	mouth	1	2	minerale	0	855	9	8	627	0.88	538	1.46	447	1.71	396	1	505	2.09	174	1.08	388	1.26
4	mouth	1	2	oca	0	1367	29	3	685	0.54	700	0	468	2.21	150	0.52	659	1.08	106	0.24	197	1.33
4	mouth	1	3	orrore	0	628	77	6	305	1.29	356	1.74	491	1.78	400	1.38	475	1.8	450	1.71	363	1.71
4	hand	1	1	ozio	0	569	9	4	268	1.43	384	1.91	445	1.99	450	1.33	494	1.69	480	1.79	568	0.95
4	hand	1	2	palude	0	534	12	6	645	0.77	613	1.13	332	1.93	341	0.95	578	1.65	175	0.9	310	2.05
4	hand	1	3	pericolo	0	573	250	8	323	1.5	361	1.85	511	1.85	231	0.7	506	1.77	394	1.37	397	1.51
4	mouth	1	1	reputazione	0	720	27	11	215	1.01	213	1.39	411	1.76	569	0.95	282	1.85	594	1.2	619	1
4	mouth	1	3	stupore	0	761	62	7	339	1.61	440	1.68	515	1.37	366	1.18	422	1.83	496	1.55	500	1.69
4	hand	1	2	telegrafo	0	1142	3	9	614	1.46	556	1.44	321	1.75	438	1.28	455	2.35	153	1.24	531	1.25
4	hand	1	1	tendenza	0	590	161	8	169	0.87	184	1.12	455	1.9	530	1.69	294	1.76	591	1.4	604	1.06
4	hand	1	3	terrore	0	823	96	7	297	1.38	408	1.87	421	1.93	326	1.08	488	1.71	455	1.7	463	2.11
4	hand	1	2	torre	0	521	44	5	656	0.63	674	0.45	423	2.02	245	0.89	579	1.63	129	0.76	228	1.59
4	hand	1	3	tradimento	0	580	73	10	363	1.2	300	1.83	464	2.05	415	1.18	485	1.88	418	1.49	432	2.04
4	hand	1	2	trattore	0	556	2	8	685	0.44	672	0.74	482	2.11	209	0.75	669	0.6	105	0.22	216	1.68
4	mouth	1	1	unanimità	0	1013	37	8	241	1.46	308	2.1	306	1.6	512	1.25	369	1.62	545	1.73	632	1.11
5	hand	1	3	abbandono	0	949	91	9	297	1.55	300	1.73	397	1.79	374	1.52	413	1.71	455	1.93	505	1.65
5	hand	1	1	affermazione	0	579	59	12	274	1.85	265	1.76	516	1.38	424	1.09	376	1.86	375	1.61	425	1.56
5	mouth	1	3	agitazione	0	944	25	10	413	1.5	311	1.56	541	1.75	320	1.44	497	1.82	441	1.54	364	2.04
5	mouth	1	3	agonia	0	1026	29	6	294	1.39	332	1.6	305	1.42	480	1.51	444	1.99	476	1.69	600	1.32
5	mouth	1	2	alghe	0	1168	24	5	669	0.62	657	0.73	422	1.93	269	0.6	641	1.48	121	0.54	225	1.34
5	hand	1	2	alveare	1		11	7	679	0.42	674	0.57	421	2.32	267	1.02	609	1.44	150	0.73	363	1.74
5	mouth	1	1	analogia	0	578	8	8	206	1.34	327	1.79	418	1.55	539	0.95	313	2.1	517	1.55	620	1.2
5	hand	1	2	canoa	0	922	25	5	679	0.59	688	0.33	440	2.13	335	1.18	600	1.14	114	0.36	288	1.57
5	mouth	1	2	circo	0	780	43	5	616	1.16	660	0.74	453	1.83	228	0.63	626	0.92	179	0.88	205	1
5	mouth	1	1	circostanza	1		70	11	273	1.7	228	1.49	412	1.73	479	1.23	331	2.09	485	1.31	642	0.61
5	hand	1	1	concetto	0	683	118	8	168	0.99	224	1.5	509	1.69	426	0.92	315	2.06	635	1.3	544	1.71
5	hand	1	3	conflitto	0	723	140	9	304	1.25	348	1.81	416	2.19	444	1.15	432	1.87	424	1.1	553	1.39
5	mouth	1	2	cravatta	0	1033	38	8	694	0.24	688	0.44	552	1.87	250	0.93	675	0.58	105	0.22	200	1.2
5	hand	1	3	disperazione	0	1152	101	12	311	1.55	428	1.74	505	1.61	389	1.35	501	1.86	459	1.43	427	1.96
5	hand	1	2	elefante	0	647	36	8	669	0.6	695	0.23	482	1.77	210	0.79	618	1.45	100	0	296	1.9
5	mouth	1	3	emergenza	0	633	161	9	315	1.64	348	1.9	500	1.6	400	1.21	474	1.88	456	1.37	509	1.42
5	hand	1	2	falce	0	801	5	5	662	0.82	632	1.3	387	1.85	365	1.04	575	1.7	129	0.56	288	1.32
5	hand	1	3	fallimento	0	642	99	10	344	1.59	263	1.74	455	1.8	420	1.28	400	1.94	450	1.69	520	1.85
5	hand	1	1	fascino	0	732	149	7	246	1.56	430	1.33	495	1.75	475	1.18	476	1.83	535	1.28	550	1.44
5	hand	1	2	flotta	0	944	35	6	600	1.2	644	0.75	442	1.71	330	0.95	582	1.66	163	0.72	375	1.9
5	mouth	1	3	fremito	0	1112	11	7	335	1.79	312	1.84	273	1.33	516	1.26	304	2.03	390	1.95	600	1.44
5	mouth	1	1	funzione	0	821	185	8	273	1.33	274	1.97	414	1.34	420	1.64	341	1.89	465	1.86	592	1.5
5	hand	1	2	gallo	0	539	12	5	700	0	695	0.23	486	1.74	215	0.75	600	1.39	112	0.54	212	1.48
5	mouth	1	2	giraffa	0	625	1	7	681	0.49	674	0.69	463	2.39	181	0.54	644	1.42	106	0.24	306	1.78
5	mouth	1	3	giuramento	0	941	13	10	309	1.5	344	1.91	393	1.44	400	1.12	417	1.76	400	1.9	553	1.21
5	hand	1	3	impulso	0	853	50	7	300	1.63	300	1.89	437	1.92	452	1.28	338	1.84	506	1	463	1.56
5	mouth	1	1	indiscrezione	0	1259	16	13	188	0.99	191	1.16	395	1.9	556	1.15	303	1.71	562	1.26	616	1.49
5	mouth	1	1	inefficienza	0	1193	17	12	245	1.3	274	1.56	418	1.87	521	1.14	345	1.88	515	1.69	563	1.71
5	mouth	1	1	inesperienza	1		5	12	232	1.19	220	1.42	427	1.83	458	1.32	355	1.77	550	1.48	556	1.54
5	hand	1	1	insufficienza	0	1064	15	13	265	1.67	230	1.55	416	2.03	363	1.2	388	2.09	526	1.42	503	1.49
5	hand	1	3	ira	0	754	45	3	296	1.43	391	1.98	395	2.07	400	1.21	382	1.71	474	1.42	491	1.55
5	hand	1	1	logica	0	579	107	6	220	1.42	195	1.43	536	1.38	435	1.42	362	1.92	559	1.33	580	1.76
5	hand	1	1	merito	0	620	141	6	232	1.38	235	1.67	489	1.41	352	1.23	382	1.82	556	1.5	450	1.81
5	hand	1	2	minerale	0	703	9	8	627	0.88	538	1.46	447	1.71	396	1	505	2.09	174	1.08	388	1.26
5	hand	1	2	oca	0	749	29	3	685	0.54	700	0	468	2.21	150	0.52	659	1.08	106	0.24	197	1.33
5	hand	1	3	orrore	0	657	77	6	305	1.29	356	1.74	491	1.78	400	1.38	475	1.8	450	1.71	363	1.71
5	mouth	1	1	ozio	1		9	4	268	1.43	384	1.91	445	1.99	450	1.33	494	1.69	480	1.79	568	0.95
5	mouth	1	2	palude	0	888	12	6	645	0.77	613	1.13	332	1.93	341	0.95	578	1.65	175	0.9	310	2.05
5	mouth	1	3	pericolo	0	733	250	8	323	1.5	361	1.85	511	1.85	231	0.7	506	1.77	394	1.37	397	1.51
5	hand	1	1	reputazione	0	743	27	11	215	1.01	213	1.39	411	1.76	569	0.95	282	1.85	594	1.2	619	1
5	hand	1	3	stupore	0	780	62	7	339	1.61	440	1.68	515	1.37	366	1.18	422	1.83	496	1.55	500	1.69
5	mouth	1	2	telegrafo	0	915	3	9	614	1.46	556	1.44	321	1.75	438	1.28	455	2.35	153	1.24	531	1.25
5	mouth	1	1	tendenza	0	1210	161	8	169	0.87	184	1.12	455	1.9	530	1.69	294	1.76	591	1.4	604	1.06
5	mouth	1	3	terrore	0	733	96	7	297	1.38	408	1.87	421	1.93	326	1.08	488	1.71	455	1.7	463	2.11
5	mouth	1	2	torre	0	820	44	5	656	0.63	674	0.45	423	2.02	245	0.89	579	1.63	129	0.76	228	1.59
5	mouth	1	3	tradimento	0	1112	73	10	363	1.2	300	1.83	464	2.05	415	1.18	485	1.88	418	1.49	432	2.04
5	mouth	1	2	trattore	0	969	2	8	685	0.44	672	0.74	482	2.11	209	0.75	669	0.6	105	0.22	216	1.68
5	hand	1	1	unanimità	0	898	37	8	241	1.46	308	2.1	306	1.6	512	1.25	369	1.62	545	1.73	632	1.11
6	mouth	1	3	abbandono	0	1262	91	9	297	1.55	300	1.73	397	1.79	374	1.52	413	1.71	455	1.93	505	1.65
6	mouth	1	1	affermazione	0	639	59	12	274	1.85	265	1.76	516	1.38	424	1.09	376	1.86	375	1.61	425	1.56
6	hand	1	3	agitazione	0	500	25	10	413	1.5	311	1.56	541	1.75	320	1.44	497	1.82	441	1.54	364	2.04
6	hand	1	3	agonia	0	443	29	6	294	1.39	332	1.6	305	1.42	480	1.51	444	1.99	476	1.69	600	1.32
6	hand	1	2	alghe	0	547	24	5	669	0.62	657	0.73	422	1.93	269	0.6	641	1.48	121	0.54	225	1.34
6	mouth	1	2	alveare	0	695	11	7	679	0.42	674	0.57	421	2.32	267	1.02	609	1.44	150	0.73	363	1.74
6	hand	1	1	analogia	0	552	8	8	206	1.34	327	1.79	418	1.55	539	0.95	313	2.1	517	1.55	620	1.2
6	mouth	1	2	canoa	0	705	25	5	679	0.59	688	0.33	440	2.13	335	1.18	600	1.14	114	0.36	288	1.57
6	hand	1	2	circo	0	482	43	5	616	1.16	660	0.74	453	1.83	228	0.63	626	0.92	179	0.88	205	1
6	hand	1	1	circostanza	0	571	70	11	273	1.7	228	1.49	412	1.73	479	1.23	331	2.09	485	1.31	642	0.61
6	mouth	1	1	concetto	0	516	118	8	168	0.99	224	1.5	509	1.69	426	0.92	315	2.06	635	1.3	544	1.71
6	mouth	1	3	conflitto	0	563	140	9	304	1.25	348	1.81	416	2.19	444	1.15	432	1.87	424	1.1	553	1.39
6	hand	1	2	cravatta	0	497	38	8	694	0.24	688	0.44	552	1.87	250	0.93	675	0.58	105	0.22	200	1.2
6	mouth	1	3	disperazione	0	877	101	12	311	1.55	428	1.74	505	1.61	389	1.35	501	1.86	459	1.43	427	1.96
6	mouth	1	2	elefante	0	851	36	8	669	0.6	695	0.23	482	1.77	210	0.79	618	1.45	100	0	296	1.9
6	hand	1	3	emergenza	0	564	161	9	315	1.64	348	1.9	500	1.6	400	1.21	474	1.88	456	1.37	509	1.42
6	mouth	1	2	falce	0	1342	5	5	662	0.82	632	1.3	387	1.85	365	1.04	575	1.7	129	0.56	288	1.32
6	mouth	1	3	fallimento	0	666	99	10	344	1.59	263	1.74	455	1.8	420	1.28	400	1.94	450	1.69	520	1.85
6	mouth	1	1	fascino	0	565	149	7	246	1.56	430	1.33	495	1.75	475	1.18	476	1.83	535	1.28	550	1.44
6	mouth	1	2	flotta	0	797	35	6	600	1.2	644	0.75	442	1.71	330	0.95	582	1.66	163	0.72	375	1.9
6	hand	1	3	fremito	0	669	11	7	335	1.79	312	1.84	273	1.33	516	1.26	304	2.03	390	1.95	600	1.44
6	hand	1	1	funzione	0	426	185	8	273	1.33	274	1.97	414	1.34	420	1.64	341	1.89	465	1.86	592	1.5
6	mouth	1	2	gallo	1		12	5	700	0	695	0.23	486	1.74	215	0.75	600	1.39	112	0.54	212	1.48
6	hand	1	2	giraffa	0	638	1	7	681	0.49	674	0.69	463	2.39	181	0.54	644	1.42	106	0.24	306	1.78
6	hand	1	3	giuramento	0	684	13	10	309	1.5	344	1.91	393	1.44	400	1.12	417	1.76	400	1.9	553	1.21
6	mouth	1	3	impulso	0	801	50	7	300	1.63	300	1.89	437	1.92	452	1.28	338	1.84	506	1	463	1.56
6	hand	1	1	indiscrezione	0	616	16	13	188	0.99	191	1.16	395	1.9	556	1.15	303	1.71	562	1.26	616	1.49
6	hand	1	1	inefficienza	0	731	17	12	245	1.3	274	1.56	418	1.87	521	1.14	345	1.88	515	1.69	563	1.71
6	hand	1	1	inesperienza	0	635	5	12	232	1.19	220	1.42	427	1.83	458	1.32	355	1.77	550	1.48	556	1.54
6	mouth	1	1	insufficienza	0	821	15	13	265	1.67	230	1.55	416	2.03	363	1.2	388	2.09	526	1.42	503	1.49
6	mouth	1	3	ira	0	656	45	3	296	1.43	391	1.98	395	2.07	400	1.21	382	1.71	474	1.42	491	1.55
6	mouth	1	1	logica	0	467	107	6	220	1.42	195	1.43	536	1.38	435	1.42	362	1.92	559	1.33	580	1.76
6	mouth	1	1	merito	0	595	141	6	232	1.38	235	1.67	489	1.41	352	1.23	382	1.82	556	1.5	450	1.81
6	mouth	1	2	minerale	0	676	9	8	627	0.88	538	1.46	447	1.71	396	1	505	2.09	174	1.08	388	1.26
6	mouth	1	2	oca	0	642	29	3	685	0.54	700	0	468	2.21	150	0.52	659	1.08	106	0.24	197	1.33
6	mouth	1	3	orrore	0	1023	77	6	305	1.29	356	1.74	491	1.78	400	1.38	475	1.8	450	1.71	363	1.71
6	hand	1	1	ozio	0	428	9	4	268	1.43	384	1.91	445	1.99	450	1.33	494	1.69	480	1.79	568	0.95
6	hand	1	2	palude	0	759	12	6	645	0.77	613	1.13	332	1.93	341	0.95	578	1.65	175	0.9	310	2.05
6	hand	1	3	pericolo	0	501	250	8	323	1.5	361	1.85	511	1.85	231	0.7	506	1.77	394	1.37	397	1.51
6	mouth	1	1	reputazione	0	571	27	11	215	1.01	213	1.39	411	1.76	569	0.95	282	1.85	594	1.2	619	1
6	mouth	1	3	stupore	0	785	62	7	339	1.61	440	1.68	515	1.37	366	1.18	422	1.83	496	1.55	500	1.69
6	hand	1	2	telegrafo	0	517	3	9	614	1.46	556	1.44	321	1.75	438	1.28	455	2.35	153	1.24	531	1.25
6	hand	1	1	tendenza	0	526	161	8	169	0.87	184	1.12	455	1.9	530	1.69	294	1.76	591	1.4	604	1.06
6	hand	1	3	terrore	0	378	96	7	297	1.38	408	1.87	421	1.93	326	1.08	488	1.71	455	1.7	463	2.11
6	hand	1	2	torre	0	663	44	5	656	0.63	674	0.45	423	2.02	245	0.89	579	1.63	129	0.76	228	1.59
6	hand	1	3	tradimento	0	405	73	10	363	1.2	300	1.83	464	2.05	415	1.18	485	1.88	418	1.49	432	2.04
6	hand	1	2	trattore	0	505	2	8	685	0.44	672	0.74	482	2.11	209	0.75	669	0.6	105	0.22	216	1.68
6	mouth	1	1	unanimità	0	1192	37	8	241	1.46	308	2.1	306	1.6	512	1.25	369	1.62	545	1.73	632	1.11
7	mouth	1	3	abbandono	0	601	91	9	297	1.55	300	1.73	397	1.79	374	1.52	413	1.71	455	1.93	505	1.65
7	mouth	1	1	affermazione	0	657	59	12	274	1.85	265	1.76	516	1.38	424	1.09	376	1.86	375	1.61	425	1.56
7	hand	1	3	agitazione	0	480	25	10	413	1.5	311	1.56	541	1.75	320	1.44	497	1.82	441	1.54	364	2.04
7	hand	1	3	agonia	0	718	29	6	294	1.39	332	1.6	305	1.42	480	1.51	444	1.99	476	1.69	600	1.32
7	hand	1	2	alghe	0	499	24	5	669	0.62	657	0.73	422	1.93	269	0.6	641	1.48	121	0.54	225	1.34
7	mouth	1	2	alveare	1		11	7	679	0.42	674	0.57	421	2.32	267	1.02	609	1.44	150	0.73	363	1.74
7	hand	1	1	analogia	0	694	8	8	206	1.34	327	1.79	418	1.55	539	0.95	313	2.1	517	1.55	620	1.2
7	mouth	1	2	canoa	0	1155	25	5	679	0.59	688	0.33	440	2.13	335	1.18	600	1.14	114	0.36	288	1.57
7	hand	1	2	circo	0	530	43	5	616	1.16	660	0.74	453	1.83	228	0.63	626	0.92	179	0.88	205	1
7	hand	1	1	circostanza	0	593	70	11	273	1.7	228	1.49	412	1.73	479	1.23	331	2.09	485	1.31	642	0.61
7	mouth	1	1	concetto	0	549	118	8	168	0.99	224	1.5	509	1.69	426	0.92	315	2.06	635	1.3	544	1.71
7	mouth	1	3	conflitto	0	557	140	9	304	1.25	348	1.81	416	2.19	444	1.15	432	1.87	424	1.1	553	1.39
7	hand	1	2	cravatta	0	880	38	8	694	0.24	688	0.44	552	1.87	250	0.93	675	0.58	105	0.22	200	1.2
7	mouth	1	3	disperazione	0	1220	101	12	311	1.55	428	1.74	505	1.61	389	1.35	501	1.86	459	1.43	427	1.96
7	mouth	1	2	elefante	1		36	8	669	0.6	695	0.23	482	1.77	210	0.79	618	1.45	100	0	296	1.9
7	hand	1	3	emergenza	0	1025	161	9	315	1.64	348	1.9	500	1.6	400	1.21	474	1.88	456	1.37	509	1.42
7	mouth	1	2	falce	1		5	5	662	0.82	632	1.3	387	1.85	365	1.04	575	1.7	129	0.56	288	1.32
7	mouth	1	3	fallimento	0	1116	99	10	344	1.59	263	1.74	455	1.8	420	1.28	400	1.94	450	1.69	520	1.85
7	mouth	1	1	fascino	0	399	149	7	246	1.56	430	1.33	495	1.75	475	1.18	476	1.83	535	1.28	550	1.44
7	mouth	1	2	flotta	0	546	35	6	600	1.2	644	0.75	442	1.71	330	0.95	582	1.66	163	0.72	375	1.9
7	hand	1	3	fremito	0	560	11	7	335	1.79	312	1.84	273	1.33	516	1.26	304	2.03	390	1.95	600	1.44
7	hand	1	1	funzione	0	749	185	8	273	1.33	274	1.97	414	1.34	420	1.64	341	1.89	465	1.86	592	1.5
7	mouth	1	2	gallo	0	589	12	5	700	0	695	0.23	486	1.74	215	0.75	600	1.39	112	0.54	212	1.48
7	hand	1	2	giraffa	0	452	1	7	681	0.49	674	0.69	463	2.39	181	0.54	644	1.42	106	0.24	306	1.78
7	hand	1	3	giuramento	0	523	13	10	309	1.5	344	1.91	393	1.44	400	1.12	417	1.76	400	1.9	553	1.21
7	mouth	1	3	impulso	0	614	50	7	300	1.63	300	1.89	437	1.92	452	1.28	338	1.84	506	1	463	1.56
7	hand	1	1	indiscrezione	0	972	16	13	188	0.99	191	1.16	395	1.9	556	1.15	303	1.71	562	1.26	616	1.49
7	hand	1	1	inefficienza	0	943	17	12	245	1.3	274	1.56	418	1.87	521	1.14	345	1.88	515	1.69	563	1.71
7	hand	1	1	inesperienza	0	1065	5	12	232	1.19	220	1.42	427	1.83	458	1.32	355	1.77	550	1.48	556	1.54
7	mouth	1	1	insufficienza	0	1072	15	13	265	1.67	230	1.55	416	2.03	363	1.2	388	2.09	526	1.42	503	1.49
7	mouth	1	3	ira	0	701	45	3	296	1.43	391	1.98	395	2.07	400	1.21	382	1.71	474	1.42	491	1.55
7	mouth	1	1	logica	0	634	107	6	220	1.42	195	1.43	536	1.38	435	1.42	362	1.92	559	1.33	580	1.76
7	mouth	1	1	merito	0	519	141	6	232	1.38	235	1.67	489	1.41	352	1.23	382	1.82	556	1.5	450	1.81
7	mouth	1	2	minerale	0	1094	9	8	627	0.88	538	1.46	447	1.71	396	1	505	2.09	174	1.08	388	1.26
7	mouth	1	2	oca	0	1378	29	3	685	0.54	700	0	468	2.21	150	0.52	659	1.08	106	0.24	197	1.33
7	mouth	1	3	orrore	0	799	77	6	305	1.29	356	1.74	491	1.78	400	1.38	475	1.8	450	1.71	363	1.71
7	hand	1	1	ozio	0	496	9	4	268	1.43	384	1.91	445	1.99	450	1.33	494	1.69	480	1.79	568	0.95
7	hand	1	2	palude	0	857	12	6	645	0.77	613	1.13	332	1.93	341	0.95	578	1.65	175	0.9	310	2.05
7	hand	1	3	pericolo	0	602	250	8	323	1.5	361	1.85	511	1.85	231	0.7	506	1.77	394	1.37	397	1.51
7	mouth	1	1	reputazione	0	741	27	11	215	1.01	213	1.39	411	1.76	569	0.95	282	1.85	594	1.2	619	1
7	mouth	1	3	stupore	0	596	62	7	339	1.61	440	1.68	515	1.37	366	1.18	422	1.83	496	1.55	500	1.69
7	hand	1	2	telegrafo	0	570	3	9	614	1.46	556	1.44	321	1.75	438	1.28	455	2.35	153	1.24	531	1.25
7	hand	1	1	tendenza	0	418	161	8	169	0.87	184	1.12	455	1.9	530	1.69	294	1.76	591	1.4	604	1.06
7	hand	1	3	terrore	0	508	96	7	297	1.38	408	1.87	421	1.93	326	1.08	488	1.71	455	1.7	463	2.11
7	hand	1	2	torre	0	517	44	5	656	0.63	674	0.45	423	2.02	245	0.89	579	1.63	129	0.76	228	1.59
7	hand	1	3	tradimento	0	681	73	10	363	1.2	300	1.83	464	2.05	415	1.18	485	1.88	418	1.49	432	2.04
7	hand	1	2	trattore	0	652	2	8	685	0.44	672	0.74	482	2.11	209	0.75	669	0.6	105	0.22	216	1.68
7	mouth	1	1	unanimità	0	1235	37	8	241	1.46	308	2.1	306	1.6	512	1.25	369	1.62	545	1.73	632	1.11
8	mouth	1	3	abbandono	0	774	91	9	297	1.55	300	1.73	397	1.79	374	1.52	413	1.71	455	1.93	505	1.65
8	mouth	1	1	affermazione	0	637	59	12	274	1.85	265	1.76	516	1.38	424	1.09	376	1.86	375	1.61	425	1.56
8	hand	1	3	agitazione	0	574	25	10	413	1.5	311	1.56	541	1.75	320	1.44	497	1.82	441	1.54	364	2.04
8	hand	1	3	agonia	0	757	29	6	294	1.39	332	1.6	305	1.42	480	1.51	444	1.99	476	1.69	600	1.32
8	hand	1	2	alghe	0	686	24	5	669	0.62	657	0.73	422	1.93	269	0.6	641	1.48	121	0.54	225	1.34
8	mouth	1	2	alveare	0	731	11	7	679	0.42	674	0.57	421	2.32	267	1.02	609	1.44	150	0.73	363	1.74
8	hand	1	1	analogia	0	566	8	8	206	1.34	327	1.79	418	1.55	539	0.95	313	2.1	517	1.55	620	1.2
8	mouth	1	2	canoa	0	741	25	5	679	0.59	688	0.33	440	2.13	335	1.18	600	1.14	114	0.36	288	1.57
8	hand	1	2	circo	0	637	43	5	616	1.16	660	0.74	453	1.83	228	0.63	626	0.92	179	0.88	205	1
8	hand	1	1	circostanza	0	602	70	11	273	1.7	228	1.49	412	1.73	479	1.23	331	2.09	485	1.31	642	0.61
8	mouth	1	1	concetto	0	812	118	8	168	0.99	224	1.5	509	1.69	426	0.92	315	2.06	635	1.3	544	1.71
8	mouth	1	3	conflitto	0	691	140	9	304	1.25	348	1.81	416	2.19	444	1.15	432	1.87	424	1.1	553	1.39
8	hand	1	2	cravatta	0	645	38	8	694	0.24	688	0.44	552	1.87	250	0.93	675	0.58	105	0.22	200	1.2
8	mouth	1	3	disperazione	0	1179	101	12	311	1.55	428	1.74	505	1.61	389	1.35	501	1.86	459	1.43	427	1.96
8	mouth	1	2	elefante	1		36	8	669	0.6	695	0.23	482	1.77	210	0.79	618	1.45	100	0	296	1.9
8	hand	1	3	emergenza	0	723	161	9	315	1.64	348	1.9	500	1.6	400	1.21	474	1.88	456	1.37	509	1.42
8	mouth	1	2	falce	0	699	5	5	662	0.82	632	1.3	387	1.85	365	1.04	575	1.7	129	0.56	288	1.32
8	mouth	1	3	fallimento	0	578	99	10	344	1.59	263	1.74	455	1.8	420	1.28	400	1.94	450	1.69	520	1.85
8	mouth	1	1	fascino	0	812	149	7	246	1.56	430	1.33	495	1.75	475	1.18	476	1.83	535	1.28	550	1.44
8	mouth	1	2	flotta	0	731	35	6	600	1.2	644	0.75	442	1.71	330	0.95	582	1.66	163	0.72	375	1.9
8	hand	1	3	fremito	0	633	11	7	335	1.79	312	1.84	273	1.33	516	1.26	304	2.03	390	1.95	600	1.44
8	hand	1	1	funzione	0	625	185	8	273	1.33	274	1.97	414	1.34	420	1.64	341	1.89	465	1.86	592	1.5
8	mouth	1	2	gallo	0	783	12	5	700	0	695	0.23	486	1.74	215	0.75	600	1.39	112	0.54	212	1.48
8	hand	1	2	giraffa	0	692	1	7	681	0.49	674	0.69	463	2.39	181	0.54	644	1.42	106	0.24	306	1.78
8	hand	1	3	giuramento	0	712	13	10	309	1.5	344	1.91	393	1.44	400	1.12	417	1.76	400	1.9	553	1.21
8	mouth	1	3	impulso	0	634	50	7	300	1.63	300	1.89	437	1.92	452	1.28	338	1.84	506	1	463	1.56
8	hand	1	1	indiscrezione	0	806	16	13	188	0.99	191	1.16	395	1.9	556	1.15	303	1.71	562	1.26	616	1.49
8	hand	1	1	inefficienza	0	661	17	12	245	1.3	274	1.56	418	1.87	521	1.14	345	1.88	515	1.69	563	1.71
8	hand	1	1	inesperienza	0	907	5	12	232	1.19	220	1.42	427	1.83	458	1.32	355	1.77	550	1.48	556	1.54
8	mouth	1	1	insufficienza	0	1053	15	13	265	1.67	230	1.55	416	2.03	363	1.2	388	2.09	526	1.42	503	1.49
8	mouth	1	3	ira	0	620	45	3	296	1.43	391	1.98	395	2.07	400	1.21	382	1.71	474	1.42	491	1.55
8	mouth	1	1	logica	0	1209	107	6	220	1.42	195	1.43	536	1.38	435	1.42	362	1.92	559	1.33	580	1.76
8	mouth	1	1	merito	0	778	141	6	232	1.38	235	1.67	489	1.41	352	1.23	382	1.82	556	1.5	450	1.81
8	mouth	1	2	minerale	0	693	9	8	627	0.88	538	1.46	447	1.71	396	1	505	2.09	174	1.08	388	1.26
8	mouth	1	2	oca	0	666	29	3	685	0.54	700	0	468	2.21	150	0.52	659	1.08	106	0.24	197	1.33
8	mouth	1	3	orrore	0	554	77	6	305	1.29	356	1.74	491	1.78	400	1.38	475	1.8	450	1.71	363	1.71
8	hand	1	1	ozio	0	736	9	4	268	1.43	384	1.91	445	1.99	450	1.33	494	1.69	480	1.79	568	0.95
8	hand	1	2	palude	0	673	12	6	645	0.77	613	1.13	332	1.93	341	0.95	578	1.65	175	0.9	310	2.05
8	hand	1	3	pericolo	0	503	250	8	323	1.5	361	1.85	511	1.85	231	0.7	506	1.77	394	1.37	397	1.51
8	mouth	1	1	reputazione	0	841	27	11	215	1.01	213	1.39	411	1.76	569	0.95	282	1.85	594	1.2	619	1
8	mouth	1	3	stupore	0	595	62	7	339	1.61	440	1.68	515	1.37	366	1.18	422	1.83	496	1.55	500	1.69
8	hand	1	2	telegrafo	0	577	3	9	614	1.46	556	1.44	321	1.75	438	1.28	455	2.35	153	1.24	531	1.25
8	hand	1	1	tendenza	0	655	161	8	169	0.87	184	1.12	455	1.9	530	1.69	294	1.76	591	1.4	604	1.06
8	hand	1	3	terrore	0	538	96	7	297	1.38	408	1.87	421	1.93	326	1.08	488	1.71	455	1.7	463	2.11
8	hand	1	2	torre	0	639	44	5	656	0.63	674	0.45	423	2.02	245	0.89	579	1.63	129	0.76	228	1.59
8	hand	1	3	tradimento	0	682	73	10	363	1.2	300	1.83	464	2.05	415	1.18	485	1.88	418	1.49	432	2.04
8	hand	1	2	trattore	0	722	2	8	685	0.44	672	0.74	482	2.11	209	0.75	669	0.6	105	0.22	216	1.68
8	mouth	1	1	unanimità	1		37	8	241	1.46	308	2.1	306	1.6	512	1.25	369	1.62	545	1.73	632	1.11
9	hand	1	3	abbandono	0	607	91	9	297	1.55	300	1.73	397	1.79	374	1.52	413	1.71	455	1.93	505	1.65
9	hand	1	1	affermazione	0	844	59	12	274	1.85	265	1.76	516	1.38	424	1.09	376	1.86	375	1.61	425	1.56
9	mouth	1	3	agitazione	0	635	25	10	413	1.5	311	1.56	541	1.75	320	1.44	497	1.82	441	1.54	364	2.04
9	mouth	1	3	agonia	0	503	29	6	294	1.39	332	1.6	305	1.42	480	1.51	444	1.99	476	1.69	600	1.32
9	mouth	1	2	alghe	0	469	24	5	669	0.62	657	0.73	422	1.93	269	0.6	641	1.48	121	0.54	225	1.34
9	hand	1	2	alveare	0	713	11	7	679	0.42	674	0.57	421	2.32	267	1.02	609	1.44	150	0.73	363	1.74
9	mouth	1	1	analogia	0	779	8	8	206	1.34	327	1.79	418	1.55	539	0.95	313	2.1	517	1.55	620	1.2
9	hand	1	2	canoa	0	571	25	5	679	0.59	688	0.33	440	2.13	335	1.18	600	1.14	114	0.36	288	1.57
9	mouth	1	2	circo	0	496	43	5	616	1.16	660	0.74	453	1.83	228	0.63	626	0.92	179	0.88	205	1
9	mouth	1	1	circostanza	0	718	70	11	273	1.7	228	1.49	412	1.73	479	1.23	331	2.09	485	1.31	642	0.61
9	hand	1	1	concetto	0	491	118	8	168	0.99	224	1.5	509	1.69	426	0.92	315	2.06	635	1.3	544	1.71
9	hand	1	3	conflitto	0	509	140	9	304	1.25	348	1.81	416	2.19	444	1.15	432	1.87	424	1.1	553	1.39
9	mouth	1	2	cravatta	0	611	38	8	694	0.24	688	0.44	552	1.87	250	0.93	675	0.58	105	0.22	200	1.2
9	hand	1	3	disperazione	0	683	101	12	311	1.55	428	1.74	505	1.61	389	1.35	501	1.86	459	1.43	427	1.96
9	hand	1	2	elefante	0	493	36	8	669	0.6	695	0.23	482	1.77	210	0.79	618	1.45	100	0	296	1.9
9	mouth	1	3	emergenza	0	556	161	9	315	1.64	348	1.9	500	1.6	400	1.21	474	1.88	456	1.37	509	1.42
9	hand	1	2	falce	0	565	5	5	662	0.82	632	1.3	387	1.85	365	1.04	575	1.7	129	0.56	288	1.32
9	hand	1	3	fallimento	0	600	99	10	344	1.59	263	1.74	455	1.8	420	1.28	400	1.94	450	1.69	520	1.85
9	hand	1	1	fascino	0	474	149	7	246	1.56	430	1.33	495	1.75	475	1.18	476	1.83	535	1.28	550	1.44
9	hand	1	2	flotta	0	528	35	6	600	1.2	644	0.75	442	1.71	330	0.95	582	1.66	163	0.72	375	1.9
9	mouth	1	3	fremito	0	874	11	7	335	1.79	312	1.84	273	1.33	516	1.26	304	2.03	390	1.95	600	1.44
9	mouth	1	1	funzione	0	580	185	8	273	1.33	274	1.97	414	1.34	420	1.64	341	1.89	465	1.86	592	1.5
9	hand	1	2	gallo	0	387	12	5	700	0	695	0.23	486	1.74	215	0.75	600	1.39	112	0.54	212	1.48
9	mouth	1	2	giraffa	0	672	1	7	681	0.49	674	0.69	463	2.39	181	0.54	644	1.42	106	0.24	306	1.78
9	mouth	1	3	giuramento	0	540	13	10	309	1.5	344	1.91	393	1.44	400	1.12	417	1.76	400	1.9	553	1.21
9	hand	1	3	impulso	0	476	50	7	300	1.63	300	1.89	437	1.92	452	1.28	338	1.84	506	1	463	1.56
9	mouth	1	1	indiscrezione	0	841	16	13	188	0.99	191	1.16	395	1.9	556	1.15	303	1.71	562	1.26	616	1.49
9	mouth	1	1	inefficienza	0	508	17	12	245	1.3	274	1.56	418	1.87	521	1.14	345	1.88	515	1.69	563	1.71
9	mouth	1	1	inesperienza	0	1005	5	12	232	1.19	220	1.42	427	1.83	458	1.32	355	1.77	550	1.48	556	1.54
9	hand	1	1	insufficienza	0	585	15	13	265	1.67	230	1.55	416	2.03	363	1.2	388	2.09	526	1.42	503	1.49
9	hand	1	3	ira	0	576	45	3	296	1.43	391	1.98	395	2.07	400	1.21	382	1.71	474	1.42	491	1.55
9	hand	1	1	logica	0	556	107	6	220	1.42	195	1.43	536	1.38	435	1.42	362	1.92	559	1.33	580	1.76
9	hand	1	1	merito	0	592	141	6	232	1.38	235	1.67	489	1.41	352	1.23	382	1.82	556	1.5	450	1.81
9	hand	1	2	minerale	0	887	9	8	627	0.88	538	1.46	447	1.71	396	1	505	2.09	174	1.08	388	1.26
9	hand	1	2	oca	0	465	29	3	685	0.54	700	0	468	2.21	150	0.52	659	1.08	106	0.24	197	1.33
9	hand	1	3	orrore	0	642	77	6	305	1.29	356	1.74	491	1.78	400	1.38	475	1.8	450	1.71	363	1.71
9	mouth	1	1	ozio	0	621	9	4	268	1.43	384	1.91	445	1.99	450	1.33	494	1.69	480	1.79	568	0.95
9	mouth	1	2	palude	1		12	6	645	0.77	613	1.13	332	1.93	341	0.95	578	1.65	175	0.9	310	2.05
9	mouth	1	3	pericolo	0	714	250	8	323	1.5	361	1.85	511	1.85	231	0.7	506	1.77	394	1.37	397	1.51
9	hand	1	1	reputazione	0	603	27	11	215	1.01	213	1.39	411	1.76	569	0.95	282	1.85	594	1.2	619	1
9	hand	1	3	stupore	0	521	62	7	339	1.61	440	1.68	515	1.37	366	1.18	422	1.83	496	1.55	500	1.69
9	mouth	1	2	telegrafo	0	649	3	9	614	1.46	556	1.44	321	1.75	438	1.28	455	2.35	153	1.24	531	1.25
9	mouth	1	1	tendenza	0	654	161	8	169	0.87	184	1.12	455	1.9	530	1.69	294	1.76	591	1.4	604	1.06
9	mouth	1	3	terrore	0	567	96	7	297	1.38	408	1.87	421	1.93	326	1.08	488	1.71	455	1.7	463	2.11
9	mouth	1	2	torre	0	520	44	5	656	0.63	674	0.45	423	2.02	245	0.89	579	1.63	129	0.76	228	1.59
9	mouth	1	3	tradimento	0	614	73	10	363	1.2	300	1.83	464	2.05	415	1.18	485	1.88	418	1.49	432	2.04
9	mouth	1	2	trattore	0	571	2	8	685	0.44	672	0.74	482	2.11	209	0.75	669	0.6	105	0.22	216	1.68
9	hand	1	1	unanimità	0	784	37	8	241	1.46	308	2.1	306	1.6	512	1.25	369	1.62	545	1.73	632	1.11
10	hand	1	3	abbandono	0	727	91	9	297	1.55	300	1.73	397	1.79	374	1.52	413	1.71	455	1.93	505	1.65
10	hand	1	1	affermazione	0	772	59	12	274	1.85	265	1.76	516	1.38	424	1.09	376	1.86	375	1.61	425	1.56
10	mouth	1	3	agitazione	0	810	25	10	413	1.5	311	1.56	541	1.75	320	1.44	497	1.82	441	1.54	364	2.04
10	mouth	1	3	agonia	0	665	29	6	294	1.39	332	1.6	305	1.42	480	1.51	444	1.99	476	1.69	600	1.32
10	mouth	1	2	alghe	0	629	24	5	669	0.62	657	0.73	422	1.93	269	0.6	641	1.48	121	0.54	225	1.34
10	hand	1	2	alveare	0	1075	11	7	679	0.42	674	0.57	421	2.32	267	1.02	609	1.44	150	0.73	363	1.74
10	mouth	1	1	analogia	0	850	8	8	206	1.34	327	1.79	418	1.55	539	0.95	313	2.1	517	1.55	620	1.2
10	hand	1	2	canoa	0	706	25	5	679	0.59	688	0.33	440	2.13	335	1.18	600	1.14	114	0.36	288	1.57
10	mouth	1	2	circo	0	626	43	5	616	1.16	660	0.74	453	1.83	228	0.63	626	0.92	179	0.88	205	1
10	mouth	1	1	circostanza	0	1391	70	11	273	1.7	228	1.49	412	1.73	479	1.23	331	2.09	485	1.31	642	0.61
10	hand	1	1	concetto	0	950	118	8	168	0.99	224	1.5	509	1.69	426	0.92	315	2.06	635	1.3	544	1.71
10	hand	1	3	conflitto	0	618	140	9	304	1.25	348	1.81	416	2.19	444	1.15	432	1.87	424	1.1	553	1.39
10	mouth	1	2	cravatta	0	706	38	8	694	0.24	688	0.44	552	1.87	250	0.93	675	0.58	105	0.22	200	1.2
10	hand	1	3	disperazione	0	631	101	12	311	1.55	428	1.74	505	1.61	389	1.35	501	1.86	459	1.43	427	1.96
10	hand	1	2	elefante	0	551	36	8	669	0.6	695	0.23	482	1.77	210	0.79	618	1.45	100	0	296	1.9
10	mouth	1	3	emergenza	0	682	161	9	315	1.64	348	1.9	500	1.6	400	1.21	474	1.88	456	1.37	509	1.42
10	hand	1	2	falce	0	808	5	5	662	0.82	632	1.3	387	1.85	365	1.04	575	1.7	129	0.56	288	1.32
10	hand	1	3	fallimento	0	763	99	10	344	1.59	263	1.74	455	1.8	420	1.28	400	1.94	450	1.69	520	1.85
10	hand	1	1	fascino	0	538	149	7	246	1.56	430	1.33	495	1.75	475	1.18	476	1.83	535	1.28	550	1.44
10	hand	1	2	flotta	0	869	35	6	600	1.2	644	0.75	442	1.71	330	0.95	582	1.66	163	0.72	375	1.9
10	mouth	1	3	fremito	0	1061	11	7	335	1.79	312	1.84	273	1.33	516	1.26	304	2.03	390	1.95	600	1.44
10	mouth	1	1	funzione	0	800	185	8	273	1.33	274	1.97	414	1.34	420	1.64	341	1.89	465	1.86	592	1.5
10	hand	1	2	gallo	0	703	12	5	700	0	695	0.23	486	1.74	215	0.75	600	1.39	112	0.54	212	1.48
10	mouth	1	2	giraffa	0	638	1	7	681	0.49	674	0.69	463	2.39	181	0.54	644	1.42	106	0.24	306	1.78
10	mouth	1	3	giuramento	0	650	13	10	309	1.5	344	1.91	393	1.44	400	1.12	417	1.76	400	1.9	553	1.21
10	hand	1	3	impulso	0	701	50	7	300	1.63	300	1.89	437	1.92	452	1.28	338	1.84	506	1	463	1.56
10	mouth	1	1	indiscrezione	1		16	13	188	0.99	191	1.16	395	1.9	556	1.15	303	1.71	562	1.26	616	1.49
10	mouth	1	1	inefficienza	0	1010	17	12	245	1.3	274	1.56	418	1.87	521	1.14	345	1.88	515	1.69	563	1.71
10	mouth	1	1	inesperienza	0	1330	5	12	232	1.19	220	1.42	427	1.83	458	1.32	355	1.77	550	1.48	556	1.54
10	hand	1	1	insufficienza	0	751	15	13	265	1.67	230	1.55	416	2.03	363	1.2	388	2.09	526	1.42	503	1.49
10	hand	1	3	ira	0	481	45	3	296	1.43	391	1.98	395	2.07	400	1.21	382	1.71	474	1.42	491	1.55
10	hand	1	1	logica	0	601	107	6	220	1.42	195	1.43	536	1.38	435	1.42	362	1.92	559	1.33	580	1.76
10	hand	1	1	merito	0	922	141	6	232	1.38	235	1.67	489	1.41	352	1.23	382	1.82	556	1.5	450	1.81
10	hand	1	2	minerale	0	710	9	8	627	0.88	538	1.46	447	1.71	396	1	505	2.09	174	1.08	388	1.26
10	hand	1	2	oca	0	536	29	3	685	0.54	700	0	468	2.21	150	0.52	659	1.08	106	0.24	197	1.33
10	hand	1	3	orrore	0	820	77	6	305	1.29	356	1.74	491	1.78	400	1.38	475	1.8	450	1.71	363	1.71
10	mouth	1	1	ozio	0	638	9	4	268	1.43	384	1.91	445	1.99	450	1.33	494	1.69	480	1.79	568	0.95
10	mouth	1	2	palude	0	783	12	6	645	0.77	613	1.13	332	1.93	341	0.95	578	1.65	175	0.9	310	2.05
10	mouth	1	3	pericolo	0	963	250	8	323	1.5	361	1.85	511	1.85	231	0.7	506	1.77	394	1.37	397	1.51
10	hand	1	1	reputazione	0	733	27	11	215	1.01	213	1.39	411	1.76	569	0.95	282	1.85	594	1.2	619	1
10	hand	1	3	stupore	0	896	62	7	339	1.61	440	1.68	515	1.37	366	1.18	422	1.83	496	1.55	500	1.69
10	mouth	1	2	telegrafo	0	1118	3	9	614	1.46	556	1.44	321	1.75	438	1.28	455	2.35	153	1.24	531	1.25
10	mouth	1	1	tendenza	0	794	161	8	169	0.87	184	1.12	455	1.9	530	1.69	294	1.76	591	1.4	604	1.06
10	mouth	1	3	terrore	0	659	96	7	297	1.38	408	1.87	421	1.93	326	1.08	488	1.71	455	1.7	463	2.11
10	mouth	1	2	torre	0	606	44	5	656	0.63	674	0.45	423	2.02	245	0.89	579	1.63	129	0.76	228	1.59
10	mouth	1	3	tradimento	0	683	73	10	363	1.2	300	1.83	464	2.05	415	1.18	485	1.88	418	1.49	432	2.04
10	mouth	1	2	trattore	0	739	2	8	685	0.44	672	0.74	482	2.11	209	0.75	669	0.6	105	0.22	216	1.68
10	hand	1	1	unanimità	1		37	8	241	1.46	308	2.1	306	1.6	512	1.25	369	1.62	545	1.73	632	1.11
11	mouth	1	3	abbandono	0	462	91	9	297	1.55	300	1.73	397	1.79	374	1.52	413	1.71	455	1.93	505	1.65
11	mouth	1	1	affermazione	0	765	59	12	274	1.85	265	1.76	516	1.38	424	1.09	376	1.86	375	1.61	425	1.56
11	hand	1	3	agitazione	0	513	25	10	413	1.5	311	1.56	541	1.75	320	1.44	497	1.82	441	1.54	364	2.04
11	hand	1	3	agonia	0	456	29	6	294	1.39	332	1.6	305	1.42	480	1.51	444	1.99	476	1.69	600	1.32
11	hand	1	2	alghe	0	477	24	5	669	0.62	657	0.73	422	1.93	269	0.6	641	1.48	121	0.54	225	1.34
11	mouth	1	2	alveare	0	544	11	7	679	0.42	674	0.57	421	2.32	267	1.02	609	1.44	150	0.73	363	1.74
11	hand	1	1	analogia	0	583	8	8	206	1.34	327	1.79	418	1.55	539	0.95	313	2.1	517	1.55	620	1.2
11	mouth	1	2	canoa	0	508	25	5	679	0.59	688	0.33	440	2.13	335	1.18	600	1.14	114	0.36	288	1.57
11	hand	1	2	circo	0	650	43	5	616	1.16	660	0.74	453	1.83	228	0.63	626	0.92	179	0.88	205	1
11	hand	1	1	circostanza	0	967	70	11	273	1.7	228	1.49	412	1.73	479	1.23	331	2.09	485	1.31	642	0.61
11	mouth	1	1	concetto	0	712	118	8	168	0.99	224	1.5	509	1.69	426	0.92	315	2.06	635	1.3	544	1.71
11	mouth	1	3	conflitto	0	661	140	9	304	1.25	348	1.81	416	2.19	444	1.15	432	1.87	424	1.1	553	1.39
11	hand	1	2	cravatta	0	515	38	8	694	0.24	688	0.44	552	1.87	250	0.93	675	0.58	105	0.22	200	1.2
11	mouth	1	3	disperazione	0	997	101	12	311	1.55	428	1.74	505	1.61	389	1.35	501	1.86	459	1.43	427	1.96
11	mouth	1	2	elefante	0	378	36	8	669	0.6	695	0.23	482	1.77	210	0.79	618	1.45	100	0	296	1.9
11	hand	1	3	emergenza	0	473	161	9	315	1.64	348	1.9	500	1.6	400	1.21	474	1.88	456	1.37	509	1.42
11	mouth	1	2	falce	0	463	5	5	662	0.82	632	1.3	387	1.85	365	1.04	575	1.7	129	0.56	288	1.32
11	mouth	1	3	fallimento	0	487	99	10	344	1.59	263	1.74	455	1.8	420	1.28	400	1.94	450	1.69	520	1.85
11	mouth	1	1	fascino	0	577	149	7	246	1.56	430	1.33	495	1.75	475	1.18	476	1.83	535	1.28	550	1.44
11	mouth	1	2	flotta	0	487	35	6	600	1.2	644	0.75	442	1.71	330	0.95	582	1.66	163	0.72	375	1.9
11	hand	1	3	fremito	0	534	11	7	335	1.79	312	1.84	273	1.33	516	1.26	304	2.03	390	1.95	600	1.44
11	hand	1	1	funzione	0	433	185	8	273	1.33	274	1.97	414	1.34	420	1.64	341	1.89	465	1.86	592	1.5
11	mouth	1	2	gallo	0	582	12	5	700	0	695	0.23	486	1.74	215	0.75	600	1.39	112	0.54	212	1.48
11	hand	1	2	giraffa	0	536	1	7	681	0.49	674	0.69	463	2.39	181	0.54	644	1.42	106	0.24	306	1.78
11	hand	1	3	giuramento	0	596	13	10	309	1.5	344	1.91	393	1.44	400	1.12	417	1.76	400	1.9	553	1.21
11	mouth	1	3	impulso	0	478	50	7	300	1.63	300	1.89	437	1.92	452	1.28	338	1.84	506	1	463	1.56
11	hand	1	1	indiscrezione	0	718	16	13	188	0.99	191	1.16	395	1.9	556	1.15	303	1.71	562	1.26	616	1.49
11	hand	1	1	inefficienza	0	1157	17	12	245	1.3	274	1.56	418	1.87	521	1.14	345	1.88	515	1.69	563	1.71
11	hand	1	1	inesperienza	0	1024	5	12	232	1.19	220	1.42	427	1.83	458	1.32	355	1.77	550	1.48	556	1.54
11	mouth	1	1	insufficienza	0	445	15	13	265	1.67	230	1.55	416	2.03	363	1.2	388	2.09	526	1.42	503	1.49
11	mouth	1	3	ira	0	570	45	3	296	1.43	391	1.98	395	2.07	400	1.21	382	1.71	474	1.42	491	1.55
11	mouth	1	1	logica	0	493	107	6	220	1.42	195	1.43	536	1.38	435	1.42	362	1.92	559	1.33	580	1.76
11	mouth	1	1	merito	0	587	141	6	232	1.38	235	1.67	489	1.41	352	1.23	382	1.82	556	1.5	450	1.81
11	mouth	1	2	minerale	0	452	9	8	627	0.88	538	1.46	447	1.71	396	1	505	2.09	174	1.08	388	1.26
11	mouth	1	2	oca	0	509	29	3	685	0.54	700	0	468	2.21	150	0.52	659	1.08	106	0.24	197	1.33
11	mouth	1	3	orrore	0	413	77	6	305	1.29	356	1.74	491	1.78	400	1.38	475	1.8	450	1.71	363	1.71
11	hand	1	1	ozio	0	484	9	4	268	1.43	384	1.91	445	1.99	450	1.33	494	1.69	480	1.79	568	0.95
11	hand	1	2	palude	0	490	12	6	645	0.77	613	1.13	332	1.93	341	0.95	578	1.65	175	0.9	310	2.05
11	hand	1	3	pericolo	0	466	250	8	323	1.5	361	1.85	511	1.85	231	0.7	506	1.77	394	1.37	397	1.51
11	mouth	1	1	reputazione	0	481	27	11	215	1.01	213	1.39	411	1.76	569	0.95	282	1.85	594	1.2	619	1
11	mouth	1	3	stupore	0	646	62	7	339	1.61	440	1.68	515	1.37	366	1.18	422	1.83	496	1.55	500	1.69
11	hand	1	2	telegrafo	0	526	3	9	614	1.46	556	1.44	321	1.75	438	1.28	455	2.35	153	1.24	531	1.25
11	hand	1	1	tendenza	0	459	161	8	169	0.87	184	1.12	455	1.9	530	1.69	294	1.76	591	1.4	604	1.06
11	hand	1	3	terrore	0	406	96	7	297	1.38	408	1.87	421	1.93	326	1.08	488	1.71	455	1.7	463	2.11
11	hand	1	2	torre	0	512	44	5	656	0.63	674	0.45	423	2.02	245	0.89	579	1.63	129	0.76	228	1.59
11	hand	1	3	tradimento	0	780	73	10	363	1.2	300	1.83	464	2.05	415	1.18	485	1.88	418	1.49	432	2.04
11	hand	1	2	trattore	0	454	2	8	685	0.44	672	0.74	482	2.11	209	0.75	669	0.6	105	0.22	216	1.68
11	mouth	1	1	unanimità	0	1111	37	8	241	1.46	308	2.1	306	1.6	512	1.25	369	1.62	545	1.73	632	1.11
12	mouth	1	3	abbandono	0	617	91	9	297	1.55	300	1.73	397	1.79	374	1.52	413	1.71	455	1.93	505	1.65
12	mouth	1	1	affermazione	0	500	59	12	274	1.85	265	1.76	516	1.38	424	1.09	376	1.86	375	1.61	425	1.56
12	hand	1	3	agitazione	0	451	25	10	413	1.5	311	1.56	541	1.75	320	1.44	497	1.82	441	1.54	364	2.04
12	hand	1	3	agonia	0	531	29	6	294	1.39	332	1.6	305	1.42	480	1.51	444	1.99	476	1.69	600	1.32
12	hand	1	2	alghe	0	482	24	5	669	0.62	657	0.73	422	1.93	269	0.6	641	1.48	121	0.54	225	1.34
12	mouth	1	2	alveare	0	705	11	7	679	0.42	674	0.57	421	2.32	267	1.02	609	1.44	150	0.73	363	1.74
12	hand	1	1	analogia	0	617	8	8	206	1.34	327	1.79	418	1.55	539	0.95	313	2.1	517	1.55	620	1.2
12	mouth	1	2	canoa	0	731	25	5	679	0.59	688	0.33	440	2.13	335	1.18	600	1.14	114	0.36	288	1.57
12	hand	1	2	circo	0	436	43	5	616	1.16	660	0.74	453	1.83	228	0.63	626	0.92	179	0.88	205	1
12	hand	1	1	circostanza	0	471	70	11	273	1.7	228	1.49	412	1.73	479	1.23	331	2.09	485	1.31	642	0.61
12	mouth	1	1	concetto	0	606	118	8	168	0.99	224	1.5	509	1.69	426	0.92	315	2.06	635	1.3	544	1.71
12	mouth	1	3	conflitto	0	551	140	9	304	1.25	348	1.81	416	2.19	444	1.15	432	1.87	424	1.1	553	1.39
12	hand	1	2	cravatta	0	566	38	8	694	0.24	688	0.44	552	1.87	250	0.93	675	0.58	105	0.22	200	1.2
12	mouth	1	3	disperazione	0	830	101	12	311	1.55	428	1.74	505	1.61	389	1.35	501	1.86	459	1.43	427	1.96
12	mouth	1	2	elefante	0	583	36	8	669	0.6	695	0.23	482	1.77	210	0.79	618	1.45	100	0	296	1.9
12	hand	1	3	emergenza	0	497	161	9	315	1.64	348	1.9	500	1.6	400	1.21	474	1.88	456	1.37	509	1.42
12	mouth	1	2	falce	0	719	5	5	662	0.82	632	1.3	387	1.85	365	1.04	575	1.7	129	0.56	288	1.32
12	mouth	1	3	fallimento	0	678	99	10	344	1.59	263	1.74	455	1.8	420	1.28	400	1.94	450	1.69	520	1.85
12	mouth	1	1	fascino	0	437	149	7	246	1.56	430	1.33	495	1.75	475	1.18	476	1.83	535	1.28	550	1.44
12	mouth	1	2	flotta	0	582	35	6	600	1.2	644	0.75	442	1.71	330	0.95	582	1.66	163	0.72	375	1.9
12	hand	1	3	fremito	0	649	11	7	335	1.79	312	1.84	273	1.33	516	1.26	304	2.03	390	1.95	600	1.44
12	hand	1	1	funzione	0	513	185	8	273	1.33	274	1.97	414	1.34	420	1.64	341	1.89	465	1.86	592	1.5
12	mouth	1	2	gallo	0	729	12	5	700	0	695	0.23	486	1.74	215	0.75	600	1.39	112	0.54	212	1.48
12	hand	1	2	giraffa	0	475	1	7	681	0.49	674	0.69	463	2.39	181	0.54	644	1.42	106	0.24	306	1.78
12	hand	1	3	giuramento	0	522	13	10	309	1.5	344	1.91	393	1.44	400	1.12	417	1.76	400	1.9	553	1.21
12	mouth	1	3	impulso	0	504	50	7	300	1.63	300	1.89	437	1.92	452	1.28	338	1.84	506	1	463	1.56
12	hand	1	1	indiscrezione	0	719	16	13	188	0.99	191	1.16	395	1.9	556	1.15	303	1.71	562	1.26	616	1.49
12	hand	1	1	inefficienza	0	938	17	12	245	1.3	274	1.56	418	1.87	521	1.14	345	1.88	515	1.69	563	1.71
12	hand	1	1	inesperienza	0	1015	5	12	232	1.19	220	1.42	427	1.83	458	1.32	355	1.77	550	1.48	556	1.54
12	mouth	1	1	insufficienza	0	841	15	13	265	1.67	230	1.55	416	2.03	363	1.2	388	2.09	526	1.42	503	1.49
12	mouth	1	3	ira	0	545	45	3	296	1.43	391	1.98	395	2.07	400	1.21	382	1.71	474	1.42	491	1.55
12	mouth	1	1	logica	0	507	107	6	220	1.42	195	1.43	536	1.38	435	1.42	362	1.92	559	1.33	580	1.76
12	mouth	1	1	merito	0	507	141	6	232	1.38	235	1.67	489	1.41	352	1.23	382	1.82	556	1.5	450	1.81
12	mouth	1	2	minerale	0	571	9	8	627	0.88	538	1.46	447	1.71	396	1	505	2.09	174	1.08	388	1.26
12	mouth	1	2	oca	0	549	29	3	685	0.54	700	0	468	2.21	150	0.52	659	1.08	106	0.24	197	1.33
12	mouth	1	3	orrore	0	635	77	6	305	1.29	356	1.74	491	1.78	400	1.38	475	1.8	450	1.71	363	1.71
12	hand	1	1	ozio	0	542	9	4	268	1.43	384	1.91	445	1.99	450	1.33	494	1.69	480	1.79	568	0.95
12	hand	1	2	palude	0	593	12	6	645	0.77	613	1.13	332	1.93	341	0.95	578	1.65	175	0.9	310	2.05
12	hand	1	3	pericolo	0	428	250	8	323	1.5	361	1.85	511	1.85	231	0.7	506	1.77	394	1.37	397	1.51
12	mouth	1	1	reputazione	0	633	27	11	215	1.01	213	1.39	411	1.76	569	0.95	282	1.85	594	1.2	619	1
12	mouth	1	3	stupore	0	583	62	7	339	1.61	440	1.68	515	1.37	366	1.18	422	1.83	496	1.55	500	1.69
12	hand	1	2	telegrafo	0	552	3	9	614	1.46	556	1.44	321	1.75	438	1.28	455	2.35	153	1.24	531	1.25
12	hand	1	1	tendenza	0	401	161	8	169	0.87	184	1.12	455	1.9	530	1.69	294	1.76	591	1.4	604	1.06
12	hand	1	3	terrore	0	525	96	7	297	1.38	408	1.87	421	1.93	326	1.08	488	1.71	455	1.7	463	2.11
12	hand	1	2	torre	0	431	44	5	656	0.63	674	0.45	423	2.02	245	0.89	579	1.63	129	0.76	228	1.59
12	hand	1	3	tradimento	0	487	73	10	363	1.2	300	1.83	464	2.05	415	1.18	485	1.88	418	1.49	432	2.04
12	hand	1	2	trattore	0	471	2	8	685	0.44	672	0.74	482	2.11	209	0.75	669	0.6	105	0.22	216	1.68
12	mouth	1	1	unanimità	0	1005	37	8	241	1.46	308	2.1	306	1.6	512	1.25	369	1.62	545	1.73	632	1.11
13	hand	1	3	abbandono	0	646	91	9	297	1.55	300	1.73	397	1.79	374	1.52	413	1.71	455	1.93	505	1.65
13	hand	1	1	affermazione	0	586	59	12	274	1.85	265	1.76	516	1.38	424	1.09	376	1.86	375	1.61	425	1.56
13	mouth	1	3	agitazione	0	900	25	10	413	1.5	311	1.56	541	1.75	320	1.44	497	1.82	441	1.54	364	2.04
13	mouth	1	3	agonia	0	629	29	6	294	1.39	332	1.6	305	1.42	480	1.51	444	1.99	476	1.69	600	1.32
13	mouth	1	2	alghe	0	582	24	5	669	0.62	657	0.73	422	1.93	269	0.6	641	1.48	121	0.54	225	1.34
13	hand	1	2	alveare	0	536	11	7	679	0.42	674	0.57	421	2.32	267	1.02	609	1.44	150	0.73	363	1.74
13	mouth	1	1	analogia	0	720	8	8	206	1.34	327	1.79	418	1.55	539	0.95	313	2.1	517	1.55	620	1.2
13	hand	1	2	canoa	0	566	25	5	679	0.59	688	0.33	440	2.13	335	1.18	600	1.14	114	0.36	288	1.57
13	mouth	1	2	circo	0	574	43	5	616	1.16	660	0.74	453	1.83	228	0.63	626	0.92	179	0.88	205	1
13	mouth	1	1	circostanza	0	682	70	11	273	1.7	228	1.49	412	1.73	479	1.23	331	2.09	485	1.31	642	0.61
13	hand	1	1	concetto	0	508	118	8	168	0.99	224	1.5	509	1.69	426	0.92	315	2.06	635	1.3	544	1.71
13	hand	1	3	conflitto	0	542	140	9	304	1.25	348	1.81	416	2.19	444	1.15	432	1.87	424	1.1	553	1.39
13	mouth	1	2	cravatta	0	609	38	8	694	0.24	688	0.44	552	1.87	250	0.93	675	0.58	105	0.22	200	1.2
13	hand	1	3	disperazione	0	598	101	12	311	1.55	428	1.74	505	1.61	389	1.35	501	1.86	459	1.43	427	1.96
13	hand	1	2	elefante	0	556	36	8	669	0.6	695	0.23	482	1.77	210	0.79	618	1.45	100	0	296	1.9
13	mouth	1	3	emergenza	0	612	161	9	315	1.64	348	1.9	500	1.6	400	1.21	474	1.88	456	1.37	509	1.42
13	hand	1	2	falce	0	648	5	5	662	0.82	632	1.3	387	1.85	365	1.04	575	1.7	129	0.56	288	1.32
13	hand	1	3	fallimento	0	637	99	10	344	1.59	263	1.74	455	1.8	420	1.28	400	1.94	450	1.69	520	1.85
13	hand	1	1	fascino	0	542	149	7	246	1.56	430	1.33	495	1.75	475	1.18	476	1.83	535	1.28	550	1.44
13	hand	1	2	flotta	0	575	35	6	600	1.2	644	0.75	442	1.71	330	0.95	582	1.66	163	0.72	375	1.9
13	mouth	1	3	fremito	0	630	11	7	335	1.79	312	1.84	273	1.33	516	1.26	304	2.03	390	1.95	600	1.44
13	mouth	1	1	funzione	0	636	185	8	273	1.33	274	1.97	414	1.34	420	1.64	341	1.89	465	1.86	592	1.5
13	hand	1	2	gallo	0	826	12	5	700	0	695	0.23	486	1.74	215	0.75	600	1.39	112	0.54	212	1.48
13	mouth	1	2	giraffa	0	784	1	7	681	0.49	674	0.69	463	2.39	181	0.54	644	1.42	106	0.24	306	1.78
13	mouth	1	3	giuramento	0	607	13	10	309	1.5	344	1.91	393	1.44	400	1.12	417	1.76	400	1.9	553	1.21
13	hand	1	3	impulso	0	568	50	7	300	1.63	300	1.89	437	1.92	452	1.28	338	1.84	506	1	463	1.56
13	mouth	1	1	indiscrezione	0	1313	16	13	188	0.99	191	1.16	395	1.9	556	1.15	303	1.71	562	1.26	616	1.49
13	mouth	1	1	inefficienza	0	900	17	12	245	1.3	274	1.56	418	1.87	521	1.14	345	1.88	515	1.69	563	1.71
13	mouth	1	1	inesperienza	0	760	5	12	232	1.19	220	1.42	427	1.83	458	1.32	355	1.77	550	1.48	556	1.54
13	hand	1	1	insufficienza	0	650	15	13	265	1.67	230	1.55	416	2.03	363	1.2	388	2.09	526	1.42	503	1.49
13	hand	1	3	ira	0	514	45	3	296	1.43	391	1.98	395	2.07	400	1.21	382	1.71	474	1.42	491	1.55
13	hand	1	1	logica	0	548	107	6	220	1.42	195	1.43	536	1.38	435	1.42	362	1.92	559	1.33	580	1.76
13	hand	1	1	merito	0	560	141	6	232	1.38	235	1.67	489	1.41	352	1.23	382	1.82	556	1.5	450	1.81
13	hand	1	2	minerale	0	594	9	8	627	0.88	538	1.46	447	1.71	396	1	505	2.09	174	1.08	388	1.26
13	hand	1	2	oca	0	611	29	3	685	0.54	700	0	468	2.21	150	0.52	659	1.08	106	0.24	197	1.33
13	hand	1	3	orrore	0	649	77	6	305	1.29	356	1.74	491	1.78	400	1.38	475	1.8	450	1.71	363	1.71
13	mouth	1	1	ozio	0	634	9	4	268	1.43	384	1.91	445	1.99	450	1.33	494	1.69	480	1.79	568	0.95
13	mouth	1	2	palude	0	562	12	6	645	0.77	613	1.13	332	1.93	341	0.95	578	1.65	175	0.9	310	2.05
13	mouth	1	3	pericolo	1		250	8	323	1.5	361	1.85	511	1.85	231	0.7	506	1.77	394	1.37	397	1.51
13	hand	1	1	reputazione	0	575	27	11	215	1.01	213	1.39	411	1.76	569	0.95	282	1.85	594	1.2	619	1
13	hand	1	3	stupore	0	469	62	7	339	1.61	440	1.68	515	1.37	366	1.18	422	1.83	496	1.55	500	1.69
13	mouth	1	2	telegrafo	0	716	3	9	614	1.46	556	1.44	321	1.75	438	1.28	455	2.35	153	1.24	531	1.25
13	mouth	1	1	tendenza	0	504	161	8	169	0.87	184	1.12	455	1.9	530	1.69	294	1.76	591	1.4	604	1.06
13	mouth	1	3	terrore	0	597	96	7	297	1.38	408	1.87	421	1.93	326	1.08	488	1.71	455	1.7	463	2.11
13	mouth	1	2	torre	0	807	44	5	656	0.63	674	0.45	423	2.02	245	0.89	579	1.63	129	0.76	228	1.59
13	mouth	1	3	tradimento	0	632	73	10	363	1.2	300	1.83	464	2.05	415	1.18	485	1.88	418	1.49	432	2.04
13	mouth	1	2	trattore	0	596	2	8	685	0.44	672	0.74	482	2.11	209	0.75	669	0.6	105	0.22	216	1.68
13	hand	1	1	unanimità	0	696	37	8	241	1.46	308	2.1	306	1.6	512	1.25	369	1.62	545	1.73	632	1.11
14	hand	1	3	abbandono	0	870	91	9	297	1.55	300	1.73	397	1.79	374	1.52	413	1.71	455	1.93	505	1.65
14	hand	1	1	affermazione	0	1179	59	12	274	1.85	265	1.76	516	1.38	424	1.09	376	1.86	375	1.61	425	1.56
14	mouth	1	3	agitazione	0	803	25	10	413	1.5	311	1.56	541	1.75	320	1.44	497	1.82	441	1.54	364	2.04
14	mouth	1	3	agonia	0	636	29	6	294	1.39	332	1.6	305	1.42	480	1.51	444	1.99	476	1.69	600	1.32
14	mouth	1	2	alghe	0	603	24	5	669	0.62	657	0.73	422	1.93	269	0.6	641	1.48	121	0.54	225	1.34
14	hand	1	2	alveare	0	1211	11	7	679	0.42	674	0.57	421	2.32	267	1.02	609	1.44	150	0.73	363	1.74
14	mouth	1	1	analogia	0	792	8	8	206	1.34	327	1.79	418	1.55	539	0.95	313	2.1	517	1.55	620	1.2
14	hand	1	2	canoa	0	703	25	5	679	0.59	688	0.33	440	2.13	335	1.18	600	1.14	114	0.36	288	1.57
14	mouth	1	2	circo	0	626	43	5	616	1.16	660	0.74	453	1.83	228	0.63	626	0.92	179	0.88	205	1
14	mouth	1	1	circostanza	0	723	70	11	273	1.7	228	1.49	412	1.73	479	1.23	331	2.09	485	1.31	642	0.61
14	hand	1	1	concetto	0	654	118	8	168	0.99	224	1.5	509	1.69	426	0.92	315	2.06	635	1.3	544	1.71
14	hand	1	3	conflitto	0	672	140	9	304	1.25	348	1.81	416	2.19	444	1.15	432	1.87	424	1.1	553	1.39
14	mouth	1	2	cravatta	0	790	38	8	694	0.24	688	0.44	552	1.87	250	0.93	675	0.58	105	0.22	200	1.2
14	hand	1	3	disperazione	0	746	101	12	311	1.55	428	1.74	505	1.61	389	1.35	501	1.86	459	1.43	427	1.96
14	hand	1	2	elefante	0	877	36	8	669	0.6	695	0.23	482	1.77	210	0.79	618	1.45	100	0	296	1.9
14	mouth	1	3	emergenza	0	766	161	9	315	1.64	348	1.9	500	1.6	400	1.21	474	1.88	456	1.37	509	1.42
14	hand	1	2	falce	0	887	5	5	662	0.82	632	1.3	387	1.85	365	1.04	575	1.7	129	0.56	288	1.32
14	hand	1	3	fallimento	0	811	99	10	344	1.59	263	1.74	455	1.8	420	1.28	400	1.94	450	1.69	520	1.85
14	hand	1	1	fascino	0	727	149	7	246	1.56	430	1.33	495	1.75	475	1.18	476	1.83	535	1.28	550	1.44
14	hand	1	2	flotta	0	830	35	6	600	1.2	644	0.75	442	1.71	330	0.95	582	1.66	163	0.72	375	1.9
14	mouth	1	3	fremito	0	1059	11	7	335	1.79	312	1.84	273	1.33	516	1.26	304	2.03	390	1.95	600	1.44
14	mouth	1	1	funzione	0	654	185	8	273	1.33	274	1.97	414	1.34	420	1.64	341	1.89	465	1.86	592	1.5
14	hand	1	2	gallo	0	605	12	5	700	0	695	0.23	486	1.74	215	0.75	600	1.39	112	0.54	212	1.48
14	mouth	1	2	giraffa	1		1	7	681	0.49	674	0.69	463	2.39	181	0.54	644	1.42	106	0.24	306	1.78
14	mouth	1	3	giuramento	0	892	13	10	309	1.5	344	1.91	393	1.44	400	1.12	417	1.76	400	1.9	553	1.21
14	hand	1	3	impulso	0	647	50	7	300	1.63	300	1.89	437	1.92	452	1.28	338	1.84	506	1	463	1.56
14	mouth	1	1	indiscrezione	0	1278	16	13	188	0.99	191	1.16	395	1.9	556	1.15	303	1.71	562	1.26	616	1.49
14	mouth	1	1	inefficienza	0	1054	17	12	245	1.3	274	1.56	418	1.87	521	1.14	345	1.88	515	1.69	563	1.71
14	mouth	1	1	inesperienza	0	954	5	12	232	1.19	220	1.42	427	1.83	458	1.32	355	1.77	550	1.48	556	1.54
14	hand	1	1	insufficienza	1		15	13	265	1.67	230	1.55	416	2.03	363	1.2	388	2.09	526	1.42	503	1.49
14	hand	1	3	ira	0	604	45	3	296	1.43	391	1.98	395	2.07	400	1.21	382	1.71	474	1.42	491	1.55
14	hand	1	1	logica	0	908	107	6	220	1.42	195	1.43	536	1.38	435	1.42	362	1.92	559	1.33	580	1.76
14	hand	1	1	merito	0	715	141	6	232	1.38	235	1.67	489	1.41	352	1.23	382	1.82	556	1.5	450	1.81
14	hand	1	2	minerale	0	656	9	8	627	0.88	538	1.46	447	1.71	396	1	505	2.09	174	1.08	388	1.26
14	hand	1	2	oca	0	596	29	3	685	0.54	700	0	468	2.21	150	0.52	659	1.08	106	0.24	197	1.33
14	hand	1	3	orrore	0	849	77	6	305	1.29	356	1.74	491	1.78	400	1.38	475	1.8	450	1.71	363	1.71
14	mouth	1	1	ozio	0	759	9	4	268	1.43	384	1.91	445	1.99	450	1.33	494	1.69	480	1.79	568	0.95
14	mouth	1	2	palude	0	642	12	6	645	0.77	613	1.13	332	1.93	341	0.95	578	1.65	175	0.9	310	2.05
14	mouth	1	3	pericolo	0	695	250	8	323	1.5	361	1.85	511	1.85	231	0.7	506	1.77	394	1.37	397	1.51
14	hand	1	1	reputazione	0	1383	27	11	215	1.01	213	1.39	411	1.76	569	0.95	282	1.85	594	1.2	619	1
14	hand	1	3	stupore	0	934	62	7	339	1.61	440	1.68	515	1.37	366	1.18	422	1.83	496	1.55	500	1.69
14	mouth	1	2	telegrafo	0	764	3	9	614	1.46	556	1.44	321	1.75	438	1.28	455	2.35	153	1.24	531	1.25
14	mouth	1	1	tendenza	0	699	161	8	169	0.87	184	1.12	455	1.9	530	1.69	294	1.76	591	1.4	604	1.06
14	mouth	1	3	terrore	0	755	96	7	297	1.38	408	1.87	421	1.93	326	1.08	488	1.71	455	1.7	463	2.11
14	mouth	1	2	torre	0	887	44	5	656	0.63	674	0.45	423	2.02	245	0.89	579	1.63	129	0.76	228	1.59
14	mouth	1	3	tradimento	0	658	73	10	363	1.2	300	1.83	464	2.05	415	1.18	485	1.88	418	1.49	432	2.04
14	mouth	1	2	trattore	0	679	2	8	685	0.44	672	0.74	482	2.11	209	0.75	669	0.6	105	0.22	216	1.68
14	hand	1	1	unanimità	0	1091	37	8	241	1.46	308	2.1	306	1.6	512	1.25	369	1.62	545	1.73	632	1.11
15	hand	1	3	abbandono	0	880	91	9	297	1.55	300	1.73	397	1.79	374	1.52	413	1.71	455	1.93	505	1.65
15	hand	1	1	affermazione	0	864	59	12	274	1.85	265	1.76	516	1.38	424	1.09	376	1.86	375	1.61	425	1.56
15	mouth	1	3	agitazione	0	839	25	10	413	1.5	311	1.56	541	1.75	320	1.44	497	1.82	441	1.54	364	2.04
15	mouth	1	3	agonia	0	758	29	6	294	1.39	332	1.6	305	1.42	480	1.51	444	1.99	476	1.69	600	1.32
15	mouth	1	2	alghe	0	693	24	5	669	0.62	657	0.73	422	1.93	269	0.6	641	1.48	121	0.54	225	1.34
15	hand	1	2	alveare	0	888	11	7	679	0.42	674	0.57	421	2.32	267	1.02	609	1.44	150	0.73	363	1.74
15	mouth	1	1	analogia	0	1121	8	8	206	1.34	327	1.79	418	1.55	539	0.95	313	2.1	517	1.55	620	1.2
15	hand	1	2	canoa	0	975	25	5	679	0.59	688	0.33	440	2.13	335	1.18	600	1.14	114	0.36	288	1.57
15	mouth	1	2	circo	0	663	43	5	616	1.16	660	0.74	453	1.83	228	0.63	626	0.92	179	0.88	205	1
15	mouth	1	1	circostanza	0	813	70	11	273	1.7	228	1.49	412	1.73	479	1.23	331	2.09	485	1.31	642	0.61
15	hand	1	1	concetto	0	582	118	8	168	0.99	224	1.5	509	1.69	426	0.92	315	2.06	635	1.3	544	1.71
15	hand	1	3	conflitto	0	842	140	9	304	1.25	348	1.81	416	2.19	444	1.15	432	1.87	424	1.1	553	1.39
15	mouth	1	2	cravatta	0	794	38	8	694	0.24	688	0.44	552	1.87	250	0.93	675	0.58	105	0.22	200	1.2
15	hand	1	3	disperazione	0	899	101	12	311	1.55	428	1.74	505	1.61	389	1.35	501	1.86	459	1.43	427	1.96
15	hand	1	2	elefante	0	632	36	8	669	0.6	695	0.23	482	1.77	210	0.79	618	1.45	100	0	296	1.9
15	mouth	1	3	emergenza	0	790	161	9	315	1.64	348	1.9	500	1.6	400	1.21	474	1.88	456	1.37	509	1.42
15	hand	1	2	falce	0	1121	5	5	662	0.82	632	1.3	387	1.85	365	1.04	575	1.7	129	0.56	288	1.32
15	hand	1	3	fallimento	0	643	99	10	344	1.59	263	1.74	455	1.8	420	1.28	400	1.94	450	1.69	520	1.85
15	hand	1	1	fascino	0	602	149	7	246	1.56	430	1.33	495	1.75	475	1.18	476	1.83	535	1.28	550	1.44
15	hand	1	2	flotta	0	817	35	6	600	1.2	644	0.75	442	1.71	330	0.95	582	1.66	163	0.72	375	1.9
15	mouth	1	3	fremito	0	1074	11	7	335	1.79	312	1.84	273	1.33	516	1.26	304	2.03	390	1.95	600	1.44
15	mouth	1	1	funzione	0	874	185	8	273	1.33	274	1.97	414	1.34	420	1.64	341	1.89	465	1.86	592	1.5
15	hand	1	2	gallo	0	501	12	5	700	0	695	0.23	486	1.74	215	0.75	600	1.39	112	0.54	212	1.48
15	mouth	1	2	giraffa	0	664	1	7	681	0.49	674	0.69	463	2.39	181	0.54	644	1.42	106	0.24	306	1.78
15	mouth	1	3	giuramento	0	1105	13	10	309	1.5	344	1.91	393	1.44	400	1.12	417	1.76	400	1.9	553	1.21
15	hand	1	3	impulso	0	587	50	7	300	1.63	300	1.89	437	1.92	452	1.28	338	1.84	506	1	463	1.56
15	mouth	1	1	indiscrezione	0	1094	16	13	188	0.99	191	1.16	395	1.9	556	1.15	303	1.71	562	1.26	616	1.49
15	mouth	1	1	inefficienza	0	955	17	12	245	1.3	274	1.56	418	1.87	521	1.14	345	1.88	515	1.69	563	1.71
15	mouth	1	1	inesperienza	0	1103	5	12	232	1.19	220	1.42	427	1.83	458	1.32	355	1.77	550	1.48	556	1.54
15	hand	1	1	insufficienza	0	1003	15	13	265	1.67	230	1.55	416	2.03	363	1.2	388	2.09	526	1.42	503	1.49
15	hand	1	3	ira	0	933	45	3	296	1.43	391	1.98	395	2.07	400	1.21	382	1.71	474	1.42	491	1.55
15	hand	1	1	logica	0	731	107	6	220	1.42	195	1.43	536	1.38	435	1.42	362	1.92	559	1.33	580	1.76
15	hand	1	1	merito	0	640	141	6	232	1.38	235	1.67	489	1.41	352	1.23	382	1.82	556	1.5	450	1.81
15	hand	1	2	minerale	0	894	9	8	627	0.88	538	1.46	447	1.71	396	1	505	2.09	174	1.08	388	1.26
15	hand	1	2	oca	0	607	29	3	685	0.54	700	0	468	2.21	150	0.52	659	1.08	106	0.24	197	1.33
15	hand	1	3	orrore	0	752	77	6	305	1.29	356	1.74	491	1.78	400	1.38	475	1.8	450	1.71	363	1.71
15	mouth	1	1	ozio	1		9	4	268	1.43	384	1.91	445	1.99	450	1.33	494	1.69	480	1.79	568	0.95
15	mouth	1	2	palude	0	827	12	6	645	0.77	613	1.13	332	1.93	341	0.95	578	1.65	175	0.9	310	2.05
15	mouth	1	3	pericolo	0	748	250	8	323	1.5	361	1.85	511	1.85	231	0.7	506	1.77	394	1.37	397	1.51
15	hand	1	1	reputazione	0	852	27	11	215	1.01	213	1.39	411	1.76	569	0.95	282	1.85	594	1.2	619	1
15	hand	1	3	stupore	0	896	62	7	339	1.61	440	1.68	515	1.37	366	1.18	422	1.83	496	1.55	500	1.69
15	mouth	1	2	telegrafo	0	1305	3	9	614	1.46	556	1.44	321	1.75	438	1.28	455	2.35	153	1.24	531	1.25
15	mouth	1	1	tendenza	0	978	161	8	169	0.87	184	1.12	455	1.9	530	1.69	294	1.76	591	1.4	604	1.06
15	mouth	1	3	terrore	0	1246	96	7	297	1.38	408	1.87	421	1.93	326	1.08	488	1.71	455	1.7	463	2.11
15	mouth	1	2	torre	0	1182	44	5	656	0.63	674	0.45	423	2.02	245	0.89	579	1.63	129	0.76	228	1.59
15	mouth	1	3	tradimento	0	758	73	10	363	1.2	300	1.83	464	2.05	415	1.18	485	1.88	418	1.49	432	2.04
15	mouth	1	2	trattore	0	741	2	8	685	0.44	672	0.74	482	2.11	209	0.75	669	0.6	105	0.22	216	1.68
15	hand	1	1	unanimità	1		37	8	241	1.46	308	2.1	306	1.6	512	1.25	369	1.62	545	1.73	632	1.11
16	hand	1	3	abbandono	0	973	91	9	297	1.55	300	1.73	397	1.79	374	1.52	413	1.71	455	1.93	505	1.65
16	hand	1	1	affermazione	0	1008	59	12	274	1.85	265	1.76	516	1.38	424	1.09	376	1.86	375	1.61	425	1.56
16	mouth	1	3	agitazione	0	903	25	10	413	1.5	311	1.56	541	1.75	320	1.44	497	1.82	441	1.54	364	2.04
16	mouth	1	3	agonia	0	900	29	6	294	1.39	332	1.6	305	1.42	480	1.51	444	1.99	476	1.69	600	1.32
16	mouth	1	2	alghe	0	869	24	5	669	0.62	657	0.73	422	1.93	269	0.6	641	1.48	121	0.54	225	1.34
16	hand	1	2	alveare	0	901	11	7	679	0.42	674	0.57	421	2.32	267	1.02	609	1.44	150	0.73	363	1.74
16	mouth	1	1	analogia	0	877	8	8	206	1.34	327	1.79	418	1.55	539	0.95	313	2.1	517	1.55	620	1.2
16	hand	1	2	canoa	0	704	25	5	679	0.59	688	0.33	440	2.13	335	1.18	600	1.14	114	0.36	288	1.57
16	mouth	1	2	circo	0	837	43	5	616	1.16	660	0.74	453	1.83	228	0.63	626	0.92	179	0.88	205	1
16	mouth	1	1	circostanza	0	969	70	11	273	1.7	228	1.49	412	1.73	479	1.23	331	2.09	485	1.31	642	0.61
16	hand	1	1	concetto	0	647	118	8	168	0.99	224	1.5	509	1.69	426	0.92	315	2.06	635	1.3	544	1.71
16	hand	1	3	conflitto	0	569	140	9	304	1.25	348	1.81	416	2.19	444	1.15	432	1.87	424	1.1	553	1.39
16	mouth	1	2	cravatta	0	712	38	8	694	0.24	688	0.44	552	1.87	250	0.93	675	0.58	105	0.22	200	1.2
16	hand	1	3	disperazione	0	1038	101	12	311	1.55	428	1.74	505	1.61	389	1.35	501	1.86	459	1.43	427	1.96
16	hand	1	2	elefante	0	676	36	8	669	0.6	695	0.23	482	1.77	210	0.79	618	1.45	100	0	296	1.9
16	mouth	1	3	emergenza	0	885	161	9	315	1.64	348	1.9	500	1.6	400	1.21	474	1.88	456	1.37	509	1.42
16	hand	1	2	falce	0	581	5	5	662	0.82	632	1.3	387	1.85	365	1.04	575	1.7	129	0.56	288	1.32
16	hand	1	3	fallimento	0	850	99	10	344	1.59	263	1.74	455	1.8	420	1.28	400	1.94	450	1.69	520	1.85
16	hand	1	1	fascino	0	701	149	7	246	1.56	430	1.33	495	1.75	475	1.18	476	1.83	535	1.28	550	1.44
16	hand	1	2	flotta	0	758	35	6	600	1.2	644	0.75	442	1.71	330	0.95	582	1.66	163	0.72	375	1.9
16	mouth	1	3	fremito	1		11	7	335	1.79	312	1.84	273	1.33	516	1.26	304	2.03	390	1.95	600	1.44
16	mouth	1	1	funzione	0	821	185	8	273	1.33	274	1.97	414	1.34	420	1.64	341	1.89	465	1.86	592	1.5
16	hand	1	2	gallo	0	723	12	5	700	0	695	0.23	486	1.74	215	0.75	600	1.39	112	0.54	212	1.48
16	mouth	1	2	giraffa	0	828	1	7	681	0.49	674	0.69	463	2.39	181	0.54	644	1.42	106	0.24	306	1.78
16	mouth	1	3	giuramento	0	1089	13	10	309	1.5	344	1.91	393	1.44	400	1.12	417	1.76	400	1.9	553	1.21
16	hand	1	3	impulso	0	635	50	7	300	1.63	300	1.89	437	1.92	452	1.28	338	1.84	506	1	463	1.56
16	mouth	1	1	indiscrezione	0	1283	16	13	188	0.99	191	1.16	395	1.9	556	1.15	303	1.71	562	1.26	616	1.49
16	mouth	1	1	inefficienza	0	1092	17	12	245	1.3	274	1.56	418	1.87	521	1.14	345	1.88	515	1.69	563	1.71
16	mouth	1	1	inesperienza	0	939	5	12	232	1.19	220	1.42	427	1.83	458	1.32	355	1.77	550	1.48	556	1.54
16	hand	1	1	insufficienza	0	1118	15	13	265	1.67	230	1.55	416	2.03	363	1.2	388	2.09	526	1.42	503	1.49
16	hand	1	3	ira	0	680	45	3	296	1.43	391	1.98	395	2.07	400	1.21	382	1.71	474	1.42	491	1.55
16	hand	1	1	logica	0	595	107	6	220	1.42	195	1.43	536	1.38	435	1.42	362	1.92	559	1.33	580	1.76
16	hand	1	1	merito	0	674	141	6	232	1.38	235	1.67	489	1.41	352	1.23	382	1.82	556	1.5	450	1.81
16	hand	1	2	minerale	0	654	9	8	627	0.88	538	1.46	447	1.71	396	1	505	2.09	174	1.08	388	1.26
16	hand	1	2	oca	0	657	29	3	685	0.54	700	0	468	2.21	150	0.52	659	1.08	106	0.24	197	1.33
16	hand	1	3	orrore	0	760	77	6	305	1.29	356	1.74	491	1.78	400	1.38	475	1.8	450	1.71	363	1.71
16	mouth	1	1	ozio	0	935	9	4	268	1.43	384	1.91	445	1.99	450	1.33	494	1.69	480	1.79	568	0.95
16	mouth	1	2	palude	0	819	12	6	645	0.77	613	1.13	332	1.93	341	0.95	578	1.65	175	0.9	310	2.05
16	mouth	1	3	pericolo	0	809	250	8	323	1.5	361	1.85	511	1.85	231	0.7	506	1.77	394	1.37	397	1.51
16	hand	1	1	reputazione	0	725	27	11	215	1.01	213	1.39	411	1.76	569	0.95	282	1.85	594	1.2	619	1
16	hand	1	3	stupore	0	675	62	7	339	1.61	440	1.68	515	1.37	366	1.18	422	1.83	496	1.55	500	1.69
16	mouth	1	2	telegrafo	0	900	3	9	614	1.46	556	1.44	321	1.75	438	1.28	455	2.35	153	1.24	531	1.25
16	mouth	1	1	tendenza	0	830	161	8	169	0.87	184	1.12	455	1.9	530	1.69	294	1.76	591	1.4	604	1.06
16	mouth	1	3	terrore	0	955	96	7	297	1.38	408	1.87	421	1.93	326	1.08	488	1.71	455	1.7	463	2.11
16	mouth	1	2	torre	0	762	44	5	656	0.63	674	0.45	423	2.02	245	0.89	579	1.63	129	0.76	228	1.59
16	mouth	1	3	tradimento	0	892	73	10	363	1.2	300	1.83	464	2.05	415	1.18	485	1.88	418	1.49	432	2.04
16	mouth	1	2	trattore	0	883	2	8	685	0.44	672	0.74	482	2.11	209	0.75	669	0.6	105	0.22	216	1.68
16	hand	1	1	unanimità	1		37	8	241	1.46	308	2.1	306	1.6	512	1.25	369	1.62	545	1.73	632	1.11
17	mouth	1	3	abbandono	0	688	91	9	297	1.55	300	1.73	397	1.79	374	1.52	413	1.71	455	1.93	505	1.65
17	mouth	1	1	affermazione	0	568	59	12	274	1.85	265	1.76	516	1.38	424	1.09	376	1.86	375	1.61	425	1.56
17	hand	1	3	agitazione	0	610	25	10	413	1.5	311	1.56	541	1.75	320	1.44	497	1.82	441	1.54	364	2.04
17	hand	1	3	agonia	0	613	29	6	294	1.39	332	1.6	305	1.42	480	1.51	444	1.99	476	1.69	600	1.32
17	hand	1	2	alghe	0	638	24	5	669	0.62	657	0.73	422	1.93	269	0.6	641	1.48	121	0.54	225	1.34
17	mouth	1	2	alveare	0	663	11	7	679	0.42	674	0.57	421	2.32	267	1.02	609	1.44	150	0.73	363	1.74
17	hand	1	1	analogia	0	698	8	8	206	1.34	327	1.79	418	1.55	539	0.95	313	2.1	517	1.55	620	1.2
17	mouth	1	2	canoa	0	640	25	5	679	0.59	688	0.33	440	2.13	335	1.18	600	1.14	114	0.36	288	1.57
17	hand	1	2	circo	0	570	43	5	616	1.16	660	0.74	453	1.83	228	0.63	626	0.92	179	0.88	205	1
17	hand	1	1	circostanza	0	557	70	11	273	1.7	228	1.49	412	1.73	479	1.23	331	2.09	485	1.31	642	0.61
17	mouth	1	1	concetto	0	589	118	8	168	0.99	224	1.5	509	1.69	426	0.92	315	2.06	635	1.3	544	1.71
17	mouth	1	3	conflitto	0	645	140	9	304	1.25	348	1.81	416	2.19	444	1.15	432	1.87	424	1.1	553	1.39
17	hand	1	2	cravatta	0	607	38	8	694	0.24	688	0.44	552	1.87	250	0.93	675	0.58	105	0.22	200	1.2
17	mouth	1	3	disperazione	0	858	101	12	311	1.55	428	1.74	505	1.61	389	1.35	501	1.86	459	1.43	427	1.96
17	mouth	1	2	elefante	0	529	36	8	669	0.6	695	0.23	482	1.77	210	0.79	618	1.45	100	0	296	1.9
17	hand	1	3	emergenza	0	598	161	9	315	1.64	348	1.9	500	1.6	400	1.21	474	1.88	456	1.37	509	1.42
17	mouth	1	2	falce	0	591	5	5	662	0.82	632	1.3	387	1.85	365	1.04	575	1.7	129	0.56	288	1.32
17	mouth	1	3	fallimento	0	554	99	10	344	1.59	263	1.74	455	1.8	420	1.28	400	1.94	450	1.69	520	1.85
17	mouth	1	1	fascino	0	610	149	7	246	1.56	430	1.33	495	1.75	475	1.18	476	1.83	535	1.28	550	1.44
17	mouth	1	2	flotta	0	637	35	6	600	1.2	644	0.75	442	1.71	330	0.95	582	1.66	163	0.72	375	1.9
17	hand	1	3	fremito	0	657	11	7	335	1.79	312	1.84	273	1.33	516	1.26	304	2.03	390	1.95	600	1.44
17	hand	1	1	funzione	0	894	185	8	273	1.33	274	1.97	414	1.34	420	1.64	341	1.89	465	1.86	592	1.5
17	mouth	1	2	gallo	0	549	12	5	700	0	695	0.23	486	1.74	215	0.75	600	1.39	112	0.54	212	1.48
17	hand	1	2	giraffa	0	561	1	7	681	0.49	674	0.69	463	2.39	181	0.54	644	1.42	106	0.24	306	1.78
17	hand	1	3	giuramento	0	657	13	10	309	1.5	344	1.91	393	1.44	400	1.12	417	1.76	400	1.9	553	1.21
17	mouth	1	3	impulso	0	614	50	7	300	1.63	300	1.89	437	1.92	452	1.28	338	1.84	506	1	463	1.56
17	hand	1	1	indiscrezione	0	1265	16	13	188	0.99	191	1.16	395	1.9	556	1.15	303	1.71	562	1.26	616	1.49
17	hand	1	1	inefficienza	0	882	17	12	245	1.3	274	1.56	418	1.87	521	1.14	345	1.88	515	1.69	563	1.71
17	hand	1	1	inesperienza	0	909	5	12	232	1.19	220	1.42	427	1.83	458	1.32	355	1.77	550	1.48	556	1.54
17	mouth	1	1	insufficienza	0	904	15	13	265	1.67	230	1.55	416	2.03	363	1.2	388	2.09	526	1.42	503	1.49
17	mouth	1	3	ira	0	552	45	3	296	1.43	391	1.98	395	2.07	400	1.21	382	1.71	474	1.42	491	1.55
17	mouth	1	1	logica	0	514	107	6	220	1.42	195	1.43	536	1.38	435	1.42	362	1.92	559	1.33	580	1.76
17	mouth	1	1	merito	0	596	141	6	232	1.38	235	1.67	489	1.41	352	1.23	382	1.82	556	1.5	450	1.81
17	mouth	1	2	minerale	0	756	9	8	627	0.88	538	1.46	447	1.71	396	1	505	2.09	174	1.08	388	1.26
17	mouth	1	2	oca	0	589	29	3	685	0.54	700	0	468	2.21	150	0.52	659	1.08	106	0.24	197	1.33
17	mouth	1	3	orrore	0	703	77	6	305	1.29	356	1.74	491	1.78	400	1.38	475	1.8	450	1.71	363	1.71
17	hand	1	1	ozio	0	737	9	4	268	1.43	384	1.91	445	1.99	450	1.33	494	1.69	480	1.79	568	0.95
17	hand	1	2	palude	0	591	12	6	645	0.77	613	1.13	332	1.93	341	0.95	578	1.65	175	0.9	310	2.05
17	hand	1	3	pericolo	0	584	250	8	323	1.5	361	1.85	511	1.85	231	0.7	506	1.77	394	1.37	397	1.51
17	mouth	1	1	reputazione	0	763	27	11	215	1.01	213	1.39	411	1.76	569	0.95	282	1.85	594	1.2	619	1
17	mouth	1	3	stupore	0	562	62	7	339	1.61	440	1.68	515	1.37	366	1.18	422	1.83	496	1.55	500	1.69
17	hand	1	2	telegrafo	0	840	3	9	614	1.46	556	1.44	321	1.75	438	1.28	455	2.35	153	1.24	531	1.25
17	hand	1	1	tendenza	0	641	161	8	169	0.87	184	1.12	455	1.9	530	1.69	294	1.76	591	1.4	604	1.06
17	hand	1	3	terrore	0	572	96	7	297	1.38	408	1.87	421	1.93	326	1.08	488	1.71	455	1.7	463	2.11
17	hand	1	2	torre	0	512	44	5	656	0.63	674	0.45	423	2.02	245	0.89	579	1.63	129	0.76	228	1.59
17	hand	1	3	tradimento	0	660	73	10	363	1.2	300	1.83	464	2.05	415	1.18	485	1.88	418	1.49	432	2.04
17	hand	1	2	trattore	0	694	2	8	685	0.44	672	0.74	482	2.11	209	0.75	669	0.6	105	0.22	216	1.68
17	mouth	1	1	unanimità	0	1146	37	8	241	1.46	308	2.1	306	1.6	512	1.25	369	1.62	545	1.73	632	1.11
18	mouth	1	3	abbandono	0	720	91	9	297	1.55	300	1.73	397	1.79	374	1.52	413	1.71	455	1.93	505	1.65
18	mouth	1	1	affermazione	0	847	59	12	274	1.85	265	1.76	516	1.38	424	1.09	376	1.86	375	1.61	425	1.56
18	hand	1	3	agitazione	0	591	25	10	413	1.5	311	1.56	541	1.75	320	1.44	497	1.82	441	1.54	364	2.04
18	hand	1	3	agonia	0	648	29	6	294	1.39	332	1.6	305	1.42	480	1.51	444	1.99	476	1.69	600	1.32
18	hand	1	2	alghe	0	988	24	5	669	0.62	657	0.73	422	1.93	269	0.6	641	1.48	121	0.54	225	1.34
18	mouth	1	2	alveare	0	636	11	7	679	0.42	674	0.57	421	2.32	267	1.02	609	1.44	150	0.73	363	1.74
18	hand	1	1	analogia	0	836	8	8	206	1.34	327	1.79	418	1.55	539	0.95	313	2.1	517	1.55	620	1.2
18	mouth	1	2	canoa	0	650	25	5	679	0.59	688	0.33	440	2.13	335	1.18	600	1.14	114	0.36	288	1.57
18	hand	1	2	circo	0	705	43	5	616	1.16	660	0.74	453	1.83	228	0.63	626	0.92	179	0.88	205	1
18	hand	1	1	circostanza	0	646	70	11	273	1.7	228	1.49	412	1.73	479	1.23	331	2.09	485	1.31	642	0.61
18	mouth	1	1	concetto	0	571	118	8	168	0.99	224	1.5	509	1.69	426	0.92	315	2.06	635	1.3	544	1.71
18	mouth	1	3	conflitto	0	981	140	9	304	1.25	348	1.81	416	2.19	444	1.15	432	1.87	424	1.1	553	1.39
18	hand	1	2	cravatta	0	602	38	8	694	0.24	688	0.44	552	1.87	250	0.93	675	0.58	105	0.22	200	1.2
18	mouth	1	3	disperazione	0	614	101	12	311	1.55	428	1.74	505	1.61	389	1.35	501	1.86	459	1.43	427	1.96
18	mouth	1	2	elefante	0	698	36	8	669	0.6	695	0.23	482	1.77	210	0.79	618	1.45	100	0	296	1.9
18	hand	1	3	emergenza	0	705	161	9	315	1.64	348	1.9	500	1.6	400	1.21	474	1.88	456	1.37	509	1.42
18	mouth	1	2	falce	0	741	5	5	662	0.82	632	1.3	387	1.85	365	1.04	575	1.7	129	0.56	288	1.32
18	mouth	1	3	fallimento	0	746	99	10	344	1.59	263	1.74	455	1.8	420	1.28	400	1.94	450	1.69	520	1.85
18	mouth	1	1	fascino	0	595	149	7	246	1.56	430	1.33	495	1.75	475	1.18	476	1.83	535	1.28	550	1.44
18	mouth	1	2	flotta	0	495	35	6	600	1.2	644	0.75	442	1.71	330	0.95	582	1.66	163	0.72	375	1.9
18	hand	1	3	fremito	0	666	11	7	335	1.79	312	1.84	273	1.33	516	1.26	304	2.03	390	1.95	600	1.44
18	hand	1	1	funzione	0	565	185	8	273	1.33	274	1.97	414	1.34	420	1.64	341	1.89	465	1.86	592	1.5
18	mouth	1	2	gallo	0	575	12	5	700	0	695	0.23	486	1.74	215	0.75	600	1.39	112	0.54	212	1.48
18	hand	1	2	giraffa	0	604	1	7	681	0.49	674	0.69	463	2.39	181	0.54	644	1.42	106	0.24	306	1.78
18	hand	1	3	giuramento	0	458	13	10	309	1.5	344	1.91	393	1.44	400	1.12	417	1.76	400	1.9	553	1.21
18	mouth	1	3	impulso	0	574	50	7	300	1.63	300	1.89	437	1.92	452	1.28	338	1.84	506	1	463	1.56
18	hand	1	1	indiscrezione	0	760	16	13	188	0.99	191	1.16	395	1.9	556	1.15	303	1.71	562	1.26	616	1.49
18	hand	1	1	inefficienza	0	868	17	12	245	1.3	274	1.56	418	1.87	521	1.14	345	1.88	515	1.69	563	1.71
18	hand	1	1	inesperienza	0	1198	5	12	232	1.19	220	1.42	427	1.83	458	1.32	355	1.77	550	1.48	556	1.54
18	mouth	1	1	insufficienza	0	741	15	13	265	1.67	230	1.55	416	2.03	363	1.2	388	2.09	526	1.42	503	1.49
18	mouth	1	3	ira	0	565	45	3	296	1.43	391	1.98	395	2.07	400	1.21	382	1.71	474	1.42	491	1.55
18	mouth	1	1	logica	0	547	107	6	220	1.42	195	1.43	536	1.38	435	1.42	362	1.92	559	1.33	580	1.76
18	mouth	1	1	merito	0	856	141	6	232	1.38	235	1.67	489	1.41	352	1.23	382	1.82	556	1.5	450	1.81
18	mouth	1	2	minerale	0	653	9	8	627	0.88	538	1.46	447	1.71	396	1	505	2.09	174	1.08	388	1.26
18	mouth	1	2	oca	0	766	29	3	685	0.54	700	0	468	2.21	150	0.52	659	1.08	106	0.24	197	1.33
18	mouth	1	3	orrore	0	713	77	6	305	1.29	356	1.74	491	1.78	400	1.38	475	1.8	450	1.71	363	1.71
18	hand	1	1	ozio	0	995	9	4	268	1.43	384	1.91	445	1.99	450	1.33	494	1.69	480	1.79	568	0.95
18	hand	1	2	palude	0	735	12	6	645	0.77	613	1.13	332	1.93	341	0.95	578	1.65	175	0.9	310	2.05
18	hand	1	3	pericolo	0	533	250	8	323	1.5	361	1.85	511	1.85	231	0.7	506	1.77	394	1.37	397	1.51
18	mouth	1	1	reputazione	0	728	27	11	215	1.01	213	1.39	411	1.76	569	0.95	282	1.85	594	1.2	619	1
18	mouth	1	3	stupore	0	631	62	7	339	1.61	440	1.68	515	1.37	366	1.18	422	1.83	496	1.55	500	1.69
18	hand	1	2	telegrafo	0	699	3	9	614	1.46	556	1.44	321	1.75	438	1.28	455	2.35	153	1.24	531	1.25
18	hand	1	1	tendenza	0	460	161	8	169	0.87	184	1.12	455	1.9	530	1.69	294	1.76	591	1.4	604	1.06
18	hand	1	3	terrore	0	571	96	7	297	1.38	408	1.87	421	1.93	326	1.08	488	1.71	455	1.7	463	2.11
18	hand	1	2	torre	0	786	44	5	656	0.63	674	0.45	423	2.02	245	0.89	579	1.63	129	0.76	228	1.59
18	hand	1	3	tradimento	0	650	73	10	363	1.2	300	1.83	464	2.05	415	1.18	485	1.88	418	1.49	432	2.04
18	hand	1	2	trattore	0	564	2	8	685	0.44	672	0.74	482	2.11	209	0.75	669	0.6	105	0.22	216	1.68
18	mouth	1	1	unanimità	0	1471	37	8	241	1.46	308	2.1	306	1.6	512	1.25	369	1.62	545	1.73	632	1.11
19	hand	1	3	abbandono	0	425	91	9	297	1.55	300	1.73	397	1.79	374	1.52	413	1.71	455	1.93	505	1.65
19	hand	1	1	affermazione	0	551	59	12	274	1.85	265	1.76	516	1.38	424	1.09	376	1.86	375	1.61	425	1.56
19	mouth	1	3	agitazione	0	457	25	10	413	1.5	311	1.56	541	1.75	320	1.44	497	1.82	441	1.54	364	2.04
19	mouth	1	3	agonia	0	534	29	6	294	1.39	332	1.6	305	1.42	480	1.51	444	1.99	476	1.69	600	1.32
19	mouth	1	2	alghe	0	606	24	5	669	0.62	657	0.73	422	1.93	269	0.6	641	1.48	121	0.54	225	1.34
19	hand	1	2	alveare	0	441	11	7	679	0.42	674	0.57	421	2.32	267	1.02	609	1.44	150	0.73	363	1.74
19	mouth	1	1	analogia	0	607	8	8	206	1.34	327	1.79	418	1.55	539	0.95	313	2.1	517	1.55	620	1.2
19	hand	1	2	canoa	0	469	25	5	679	0.59	688	0.33	440	2.13	335	1.18	600	1.14	114	0.36	288	1.57
19	mouth	1	2	circo	0	501	43	5	616	1.16	660	0.74	453	1.83	228	0.63	626	0.92	179	0.88	205	1
19	mouth	1	1	circostanza	0	509	70	11	273	1.7	228	1.49	412	1.73	479	1.23	331	2.09	485	1.31	642	0.61
19	hand	1	1	concetto	0	373	118	8	168	0.99	224	1.5	509	1.69	426	0.92	315	2.06	635	1.3	544	1.71
19	hand	1	3	conflitto	0	431	140	9	304	1.25	348	1.81	416	2.19	444	1.15	432	1.87	424	1.1	553	1.39
19	mouth	1	2	cravatta	0	521	38	8	694	0.24	688	0.44	552	1.87	250	0.93	675	0.58	105	0.22	200	1.2
19	hand	1	3	disperazione	0	633	101	12	311	1.55	428	1.74	505	1.61	389	1.35	501	1.86	459	1.43	427	1.96
19	hand	1	2	elefante	0	423	36	8	669	0.6	695	0.23	482	1.77	210	0.79	618	1.45	100	0	296	1.9
19	mouth	1	3	emergenza	0	596	161	9	315	1.64	348	1.9	500	1.6	400	1.21	474	1.88	456	1.37	509	1.42
19	hand	1	2	falce	0	517	5	5	662	0.82	632	1.3	387	1.85	365	1.04	575	1.7	129	0.56	288	1.32
19	hand	1	3	fallimento	0	493	99	10	344	1.59	263	1.74	455	1.8	420	1.28	400	1.94	450	1.69	520	1.85
19	hand	1	1	fascino	0	373	149	7	246	1.56	430	1.33	495	1.75	475	1.18	476	1.83	535	1.28	550	1.44
19	hand	1	2	flotta	0	551	35	6	600	1.2	644	0.75	442	1.71	330	0.95	582	1.66	163	0.72	375	1.9
19	mouth	1	3	fremito	0	528	11	7	335	1.79	312	1.84	273	1.33	516	1.26	304	2.03	390	1.95	600	1.44
19	mouth	1	1	funzione	0	628	185	8	273	1.33	274	1.97	414	1.34	420	1.64	341	1.89	465	1.86	592	1.5
19	hand	1	2	gallo	0	415	12	5	700	0	695	0.23	486	1.74	215	0.75	600	1.39	112	0.54	212	1.48
19	mouth	1	2	giraffa	0	512	1	7	681	0.49	674	0.69	463	2.39	181	0.54	644	1.42	106	0.24	306	1.78
19	mouth	1	3	giuramento	0	602	13	10	309	1.5	344	1.91	393	1.44	400	1.12	417	1.76	400	1.9	553	1.21
19	hand	1	3	impulso	0	417	50	7	300	1.63	300	1.89	437	1.92	452	1.28	338	1.84	506	1	463	1.56
19	mouth	1	1	indiscrezione	0	595	16	13	188	0.99	191	1.16	395	1.9	556	1.15	303	1.71	562	1.26	616	1.49
19	mouth	1	1	inefficienza	0	720	17	12	245	1.3	274	1.56	418	1.87	521	1.14	345	1.88	515	1.69	563	1.71
19	mouth	1	1	inesperienza	0	1035	5	12	232	1.19	220	1.42	427	1.83	458	1.32	355	1.77	550	1.48	556	1.54
19	hand	1	1	insufficienza	0	494	15	13	265	1.67	230	1.55	416	2.03	363	1.2	388	2.09	526	1.42	503	1.49
19	hand	1	3	ira	0	367	45	3	296	1.43	391	1.98	395	2.07	400	1.21	382	1.71	474	1.42	491	1.55
19	hand	1	1	logica	0	432	107	6	220	1.42	195	1.43	536	1.38	435	1.42	362	1.92	559	1.33	580	1.76
19	hand	1	1	merito	0	355	141	6	232	1.38	235	1.67	489	1.41	352	1.23	382	1.82	556	1.5	450	1.81
19	hand	1	2	minerale	0	443	9	8	627	0.88	538	1.46	447	1.71	396	1	505	2.09	174	1.08	388	1.26
19	hand	1	2	oca	0	410	29	3	685	0.54	700	0	468	2.21	150	0.52	659	1.08	106	0.24	197	1.33
19	hand	1	3	orrore	0	418	77	6	305	1.29	356	1.74	491	1.78	400	1.38	475	1.8	450	1.71	363	1.71
19	mouth	1	1	ozio	0	583	9	4	268	1.43	384	1.91	445	1.99	450	1.33	494	1.69	480	1.79	568	0.95
19	mouth	1	2	palude	0	523	12	6	645	0.77	613	1.13	332	1.93	341	0.95	578	1.65	175	0.9	310	2.05
19	mouth	1	3	pericolo	0	533	250	8	323	1.5	361	1.85	511	1.85	231	0.7	506	1.77	394	1.37	397	1.51
19	hand	1	1	reputazione	0	513	27	11	215	1.01	213	1.39	411	1.76	569	0.95	282	1.85	594	1.2	619	1
19	hand	1	3	stupore	0	392	62	7	339	1.61	440	1.68	515	1.37	366	1.18	422	1.83	496	1.55	500	1.69
19	mouth	1	2	telegrafo	0	564	3	9	614	1.46	556	1.44	321	1.75	438	1.28	455	2.35	153	1.24	531	1.25
19	mouth	1	1	tendenza	0	668	161	8	169	0.87	184	1.12	455	1.9	530	1.69	294	1.76	591	1.4	604	1.06
19	mouth	1	3	terrore	0	549	96	7	297	1.38	408	1.87	421	1.93	326	1.08	488	1.71	455	1.7	463	2.11
19	mouth	1	2	torre	0	473	44	5	656	0.63	674	0.45	423	2.02	245	0.89	579	1.63	129	0.76	228	1.59
19	mouth	1	3	tradimento	0	532	73	10	363	1.2	300	1.83	464	2.05	415	1.18	485	1.88	418	1.49	432	2.04
19	mouth	1	2	trattore	0	469	2	8	685	0.44	672	0.74	482	2.11	209	0.75	669	0.6	105	0.22	216	1.68
19	hand	1	1	unanimità	1		37	8	241	1.46	308	2.1	306	1.6	512	1.25	369	1.62	545	1.73	632	1.11
20	hand	1	3	abbandono	0	810	91	9	297	1.55	300	1.73	397	1.79	374	1.52	413	1.71	455	1.93	505	1.65
20	hand	1	1	affermazione	0	788	59	12	274	1.85	265	1.76	516	1.38	424	1.09	376	1.86	375	1.61	425	1.56
20	mouth	1	3	agitazione	0	990	25	10	413	1.5	311	1.56	541	1.75	320	1.44	497	1.82	441	1.54	364	2.04
20	mouth	1	3	agonia	0	1228	29	6	294	1.39	332	1.6	305	1.42	480	1.51	444	1.99	476	1.69	600	1.32
20	mouth	1	2	alghe	0	621	24	5	669	0.62	657	0.73	422	1.93	269	0.6	641	1.48	121	0.54	225	1.34
20	hand	1	2	alveare	0	782	11	7	679	0.42	674	0.57	421	2.32	267	1.02	609	1.44	150	0.73	363	1.74
20	mouth	1	1	analogia	0	813	8	8	206	1.34	327	1.79	418	1.55	539	0.95	313	2.1	517	1.55	620	1.2
20	hand	1	2	canoa	0	627	25	5	679	0.59	688	0.33	440	2.13	335	1.18	600	1.14	114	0.36	288	1.57
20	mouth	1	2	circo	0	752	43	5	616	1.16	660	0.74	453	1.83	228	0.63	626	0.92	179	0.88	205	1
20	mouth	1	1	circostanza	0	1158	70	11	273	1.7	228	1.49	412	1.73	479	1.23	331	2.09	485	1.31	642	0.61
20	hand	1	1	concetto	0	606	118	8	168	0.99	224	1.5	509	1.69	426	0.92	315	2.06	635	1.3	544	1.71
20	hand	1	3	conflitto	0	599	140	9	304	1.25	348	1.81	416	2.19	444	1.15	432	1.87	424	1.1	553	1.39
20	mouth	1	2	cravatta	0	992	38	8	694	0.24	688	0.44	552	1.87	250	0.93	675	0.58	105	0.22	200	1.2
20	hand	1	3	disperazione	0	924	101	12	311	1.55	428	1.74	505	1.61	389	1.35	501	1.86	459	1.43	427	1.96
20	hand	1	2	elefante	0	564	36	8	669	0.6	695	0.23	482	1.77	210	0.79	618	1.45	100	0	296	1.9
20	mouth	1	3	emergenza	0	859	161	9	315	1.64	348	1.9	500	1.6	400	1.21	474	1.88	456	1.37	509	1.42
20	hand	1	2	falce	0	1023	5	5	662	0.82	632	1.3	387	1.85	365	1.04	575	1.7	129	0.56	288	1.32
20	hand	1	3	fallimento	0	601	99	10	344	1.59	263	1.74	455	1.8	420	1.28	400	1.94	450	1.69	520	1.85
20	hand	1	1	fascino	0	575	149	7	246	1.56	430	1.33	495	1.75	475	1.18	476	1.83	535	1.28	550	1.44
20	hand	1	2	flotta	0	1222	35	6	600	1.2	644	0.75	442	1.71	330	0.95	582	1.66	163	0.72	375	1.9
20	mouth	1	3	fremito	0	926	11	7	335	1.79	312	1.84	273	1.33	516	1.26	304	2.03	390	1.95	600	1.44
20	mouth	1	1	funzione	0	936	185	8	273	1.33	274	1.97	414	1.34	420	1.64	341	1.89	465	1.86	592	1.5
20	hand	1	2	gallo	0	548	12	5	700	0	695	0.23	486	1.74	215	0.75	600	1.39	112	0.54	212	1.48
20	mouth	1	2	giraffa	0	1402	1	7	681	0.49	674	0.69	463	2.39	181	0.54	644	1.42	106	0.24	306	1.78
20	mouth	1	3	giuramento	0	897	13	10	309	1.5	344	1.91	393	1.44	400	1.12	417	1.76	400	1.9	553	1.21
20	hand	1	3	impulso	0	710	50	7	300	1.63	300	1.89	437	1.92	452	1.28	338	1.84	506	1	463	1.56
20	mouth	1	1	indiscrezione	0	1216	16	13	188	0.99	191	1.16	395	1.9	556	1.15	303	1.71	562	1.26	616	1.49
20	mouth	1	1	inefficienza	1		17	12	245	1.3	274	1.56	418	1.87	521	1.14	345	1.88	515	1.69	563	1.71
20	mouth	1	1	inesperienza	1		5	12	232	1.19	220	1.42	427	1.83	458	1.32	355	1.77	550	1.48	556	1.54
20	hand	1	1	insufficienza	0	1125	15	13	265	1.67	230	1.55	416	2.03	363	1.2	388	2.09	526	1.42	503	1.49
20	hand	1	3	ira	0	588	45	3	296	1.43	391	1.98	395	2.07	400	1.21	382	1.71	474	1.42	491	1.55
20	hand	1	1	logica	0	587	107	6	220	1.42	195	1.43	536	1.38	435	1.42	362	1.92	559	1.33	580	1.76
20	hand	1	1	merito	1		141	6	232	1.38	235	1.67	489	1.41	352	1.23	382	1.82	556	1.5	450	1.81
20	hand	1	2	minerale	0	1247	9	8	627	0.88	538	1.46	447	1.71	396	1	505	2.09	174	1.08	388	1.26
20	hand	1	2	oca	0	595	29	3	685	0.54	700	0	468	2.21	150	0.52	659	1.08	106	0.24	197	1.33
20	hand	1	3	orrore	0	1289	77	6	305	1.29	356	1.74	491	1.78	400	1.38	475	1.8	450	1.71	363	1.71
20	mouth	1	1	ozio	0	1080	9	4	268	1.43	384	1.91	445	1.99	450	1.33	494	1.69	480	1.79	568	0.95
20	mouth	1	2	palude	0	880	12	6	645	0.77	613	1.13	332	1.93	341	0.95	578	1.65	175	0.9	310	2.05
20	mouth	1	3	pericolo	0	764	250	8	323	1.5	361	1.85	511	1.85	231	0.7	506	1.77	394	1.37	397	1.51
20	hand	1	1	reputazione	0	555	27	11	215	1.01	213	1.39	411	1.76	569	0.95	282	1.85	594	1.2	619	1
20	hand	1	3	stupore	0	688	62	7	339	1.61	440	1.68	515	1.37	366	1.18	422	1.83	496	1.55	500	1.69
20	mouth	1	2	telegrafo	0	926	3	9	614	1.46	556	1.44	321	1.75	438	1.28	455	2.35	153	1.24	531	1.25
20	mouth	1	1	tendenza	0	1006	161	8	169	0.87	184	1.12	455	1.9	530	1.69	294	1.76	591	1.4	604	1.06
20	mouth	1	3	terrore	0	823	96	7	297	1.38	408	1.87	421	1.93	326	1.08	488	1.71	455	1.7	463	2.11
20	mouth	1	2	torre	0	1016	44	5	656	0.63	674	0.45	423	2.02	245	0.89	579	1.63	129	0.76	228	1.59
20	mouth	1	3	tradimento	0	1212	73	10	363	1.2	300	1.83	464	2.05	415	1.18	485	1.88	418	1.49	432	2.04
20	mouth	1	2	trattore	0	785	2	8	685	0.44	672	0.74	482	2.11	209	0.75	669	0.6	105	0.22	216	1.68
20	hand	1	1	unanimità	1		37	8	241	1.46	308	2.1	306	1.6	512	1.25	369	1.62	545	1.73	632	1.11
21	mouth	1	3	abbandono	0	823	91	9	297	1.55	300	1.73	397	1.79	374	1.52	413	1.71	455	1.93	505	1.65
21	mouth	1	1	affermazione	0	785	59	12	274	1.85	265	1.76	516	1.38	424	1.09	376	1.86	375	1.61	425	1.56
21	hand	1	3	agitazione	0	580	25	10	413	1.5	311	1.56	541	1.75	320	1.44	497	1.82	441	1.54	364	2.04
21	hand	1	3	agonia	0	482	29	6	294	1.39	332	1.6	305	1.42	480	1.51	444	1.99	476	1.69	600	1.32
21	hand	1	2	alghe	0	581	24	5	669	0.62	657	0.73	422	1.93	269	0.6	641	1.48	121	0.54	225	1.34
21	mouth	1	2	alveare	0	1427	11	7	679	0.42	674	0.57	421	2.32	267	1.02	609	1.44	150	0.73	363	1.74
21	hand	1	1	analogia	0	594	8	8	206	1.34	327	1.79	418	1.55	539	0.95	313	2.1	517	1.55	620	1.2
21	mouth	1	2	canoa	0	782	25	5	679	0.59	688	0.33	440	2.13	335	1.18	600	1.14	114	0.36	288	1.57
21	hand	1	2	circo	0	500	43	5	616	1.16	660	0.74	453	1.83	228	0.63	626	0.92	179	0.88	205	1
21	hand	1	1	circostanza	0	535	70	11	273	1.7	228	1.49	412	1.73	479	1.23	331	2.09	485	1.31	642	0.61
21	mouth	1	1	concetto	0	542	118	8	168	0.99	224	1.5	509	1.69	426	0.92	315	2.06	635	1.3	544	1.71
21	mouth	1	3	conflitto	0	703	140	9	304	1.25	348	1.81	416	2.19	444	1.15	432	1.87	424	1.1	553	1.39
21	hand	1	2	cravatta	0	696	38	8	694	0.24	688	0.44	552	1.87	250	0.93	675	0.58	105	0.22	200	1.2
21	mouth	1	3	disperazione	0	643	101	12	311	1.55	428	1.74	505	1.61	389	1.35	501	1.86	459	1.43	427	1.96
21	mouth	1	2	elefante	0	592	36	8	669	0.6	695	0.23	482	1.77	210	0.79	618	1.45	100	0	296	1.9
21	hand	1	3	emergenza	0	537	161	9	315	1.64	348	1.9	500	1.6	400	1.21	474	1.88	456	1.37	509	1.42
21	mouth	1	2	falce	0	870	5	5	662	0.82	632	1.3	387	1.85	365	1.04	575	1.7	129	0.56	288	1.32
21	mouth	1	3	fallimento	0	647	99	10	344	1.59	263	1.74	455	1.8	420	1.28	400	1.94	450	1.69	520	1.85
21	mouth	1	1	fascino	0	538	149	7	246	1.56	430	1.33	495	1.75	475	1.18	476	1.83	535	1.28	550	1.44
21	mouth	1	2	flotta	0	1119	35	6	600	1.2	644	0.75	442	1.71	330	0.95	582	1.66	163	0.72	375	1.9
21	hand	1	3	fremito	0	996	11	7	335	1.79	312	1.84	273	1.33	516	1.26	304	2.03	390	1.95	600	1.44
21	hand	1	1	funzione	0	485	185	8	273	1.33	274	1.97	414	1.34	420	1.64	341	1.89	465	1.86	592	1.5
21	mouth	1	2	gallo	1		12	5	700	0	695	0.23	486	1.74	215	0.75	600	1.39	112	0.54	212	1.48
21	hand	1	2	giraffa	0	562	1	7	681	0.49	674	0.69	463	2.39	181	0.54	644	1.42	106	0.24	306	1.78
21	hand	1	3	giuramento	0	554	13	10	309	1.5	344	1.91	393	1.44	400	1.12	417	1.76	400	1.9	553	1.21
21	mouth	1	3	impulso	0	634	50	7	300	1.63	300	1.89	437	1.92	452	1.28	338	1.84	506	1	463	1.56
21	hand	1	1	indiscrezione	0	601	16	13	188	0.99	191	1.16	395	1.9	556	1.15	303	1.71	562	1.26	616	1.49
21	hand	1	1	inefficienza	0	728	17	12	245	1.3	274	1.56	418	1.87	521	1.14	345	1.88	515	1.69	563	1.71
21	hand	1	1	inesperienza	0	959	5	12	232	1.19	220	1.42	427	1.83	458	1.32	355	1.77	550	1.48	556	1.54
21	mouth	1	1	insufficienza	0	790	15	13	265	1.67	230	1.55	416	2.03	363	1.2	388	2.09	526	1.42	503	1.49
21	mouth	1	3	ira	0	612	45	3	296	1.43	391	1.98	395	2.07	400	1.21	382	1.71	474	1.42	491	1.55
21	mouth	1	1	logica	0	612	107	6	220	1.42	195	1.43	536	1.38	435	1.42	362	1.92	559	1.33	580	1.76
21	mouth	1	1	merito	0	538	141	6	232	1.38	235	1.67	489	1.41	352	1.23	382	1.82	556	1.5	450	1.81
21	mouth	1	2	minerale	0	814	9	8	627	0.88	538	1.46	447	1.71	396	1	505	2.09	174	1.08	388	1.26
21	mouth	1	2	oca	0	601	29	3	685	0.54	700	0	468	2.21	150	0.52	659	1.08	106	0.24	197	1.33
21	mouth	1	3	orrore	0	585	77	6	305	1.29	356	1.74	491	1.78	400	1.38	475	1.8	450	1.71	363	1.71
21	hand	1	1	ozio	1		9	4	268	1.43	384	1.91	445	1.99	450	1.33	494	1.69	480	1.79	568	0.95
21	hand	1	2	palude	0	526	12	6	645	0.77	613	1.13	332	1.93	341	0.95	578	1.65	175	0.9	310	2.05
21	hand	1	3	pericolo	0	637	250	8	323	1.5	361	1.85	511	1.85	231	0.7	506	1.77	394	1.37	397	1.51
21	mouth	1	1	reputazione	0	719	27	11	215	1.01	213	1.39	411	1.76	569	0.95	282	1.85	594	1.2	619	1
21	mouth	1	3	stupore	0	653	62	7	339	1.61	440	1.68	515	1.37	366	1.18	422	1.83	496	1.55	500	1.69
21	hand	1	2	telegrafo	0	651	3	9	614	1.46	556	1.44	321	1.75	438	1.28	455	2.35	153	1.24	531	1.25
21	hand	1	1	tendenza	0	523	161	8	169	0.87	184	1.12	455	1.9	530	1.69	294	1.76	591	1.4	604	1.06
21	hand	1	3	terrore	0	486	96	7	297	1.38	408	1.87	421	1.93	326	1.08	488	1.71	455	1.7	463	2.11
21	hand	1	2	torre	0	505	44	5	656	0.63	674	0.45	423	2.02	245	0.89	579	1.63	129	0.76	228	1.59
21	hand	1	3	tradimento	0	528	73	10	363	1.2	300	1.83	464	2.05	415	1.18	485	1.88	418	1.49	432	2.04
21	hand	1	2	trattore	0	551	2	8	685	0.44	672	0.74	482	2.11	209	0.75	669	0.6	105	0.22	216	1.68
21	mouth	1	1	unanimità	0	987	37	8	241	1.46	308	2.1	306	1.6	512	1.25	369	1.62	545	1.73	632	1.11
22	mouth	1	3	abbandono	0	713	91	9	297	1.55	300	1.73	397	1.79	374	1.52	413	1.71	455	1.93	505	1.65
22	mouth	1	1	affermazione	0	946	59	12	274	1.85	265	1.76	516	1.38	424	1.09	376	1.86	375	1.61	425	1.56
22	hand	1	3	agitazione	0	593	25	10	413	1.5	311	1.56	541	1.75	320	1.44	497	1.82	441	1.54	364	2.04
22	hand	1	3	agonia	0	601	29	6	294	1.39	332	1.6	305	1.42	480	1.51	444	1.99	476	1.69	600	1.32
22	hand	1	2	alghe	0	493	24	5	669	0.62	657	0.73	422	1.93	269	0.6	641	1.48	121	0.54	225	1.34
22	mouth	1	2	alveare	0	723	11	7	679	0.42	674	0.57	421	2.32	267	1.02	609	1.44	150	0.73	363	1.74
22	hand	1	1	analogia	0	525	8	8	206	1.34	327	1.79	418	1.55	539	0.95	313	2.1	517	1.55	620	1.2
22	mouth	1	2	canoa	0	651	25	5	679	0.59	688	0.33	440	2.13	335	1.18	600	1.14	114	0.36	288	1.57
22	hand	1	2	circo	0	459	43	5	616	1.16	660	0.74	453	1.83	228	0.63	626	0.92	179	0.88	205	1
22	hand	1	1	circostanza	0	514	70	11	273	1.7	228	1.49	412	1.73	479	1.23	331	2.09	485	1.31	642	0.61
22	mouth	1	1	concetto	0	589	118	8	168	0.99	224	1.5	509	1.69	426	0.92	315	2.06	635	1.3	544	1.71
22	mouth	1	3	conflitto	0	576	140	9	304	1.25	348	1.81	416	2.19	444	1.15	432	1.87	424	1.1	553	1.39
22	hand	1	2	cravatta	0	584	38	8	694	0.24	688	0.44	552	1.87	250	0.93	675	0.58	105	0.22	200	1.2
22	mouth	1	3	disperazione	0	529	101	12	311	1.55	428	1.74	505	1.61	389	1.35	501	1.86	459	1.43	427	1.96
22	mouth	1	2	elefante	0	847	36	8	669	0.6	695	0.23	482	1.77	210	0.79	618	1.45	100	0	296	1.9
22	hand	1	3	emergenza	0	593	161	9	315	1.64	348	1.9	500	1.6	400	1.21	474	1.88	456	1.37	509	1.42
22	mouth	1	2	falce	0	594	5	5	662	0.82	632	1.3	387	1.85	365	1.04	575	1.7	129	0.56	288	1.32
22	mouth	1	3	fallimento	0	684	99	10	344	1.59	263	1.74	455	1.8	420	1.28	400	1.94	450	1.69	520	1.85
22	mouth	1	1	fascino	0	722	149	7	246	1.56	430	1.33	495	1.75	475	1.18	476	1.83	535	1.28	550	1.44
22	mouth	1	2	flotta	0	549	35	6	600	1.2	644	0.75	442	1.71	330	0.95	582	1.66	163	0.72	375	1.9
22	hand	1	3	fremito	0	846	11	7	335	1.79	312	1.84	273	1.33	516	1.26	304	2.03	390	1.95	600	1.44
22	hand	1	1	funzione	0	462	185	8	273	1.33	274	1.97	414	1.34	420	1.64	341	1.89	465	1.86	592	1.5
22	mouth	1	2	gallo	0	504	12	5	700	0	695	0.23	486	1.74	215	0.75	600	1.39	112	0.54	212	1.48
22	hand	1	2	giraffa	0	537	1	7	681	0.49	674	0.69	463	2.39	181	0.54	644	1.42	106	0.24	306	1.78
22	hand	1	3	giuramento	0	707	13	10	309	1.5	344	1.91	393	1.44	400	1.12	417	1.76	400	1.9	553	1.21
22	mouth	1	3	impulso	0	699	50	7	300	1.63	300	1.89	437	1.92	452	1.28	338	1.84	506	1	463	1.56
22	hand	1	1	indiscrezione	0	735	16	13	188	0.99	191	1.16	395	1.9	556	1.15	303	1.71	562	1.26	616	1.49
22	hand	1	1	inefficienza	0	517	17	12	245	1.3	274	1.56	418	1.87	521	1.14	345	1.88	515	1.69	563	1.71
22	hand	1	1	inesperienza	0	933	5	12	232	1.19	220	1.42	427	1.83	458	1.32	355	1.77	550	1.48	556	1.54
22	mouth	1	1	insufficienza	0	691	15	13	265	1.67	230	1.55	416	2.03	363	1.2	388	2.09	526	1.42	503	1.49
22	mouth	1	3	ira	0	477	45	3	296	1.43	391	1.98	395	2.07	400	1.21	382	1.71	474	1.42	491	1.55
22	mouth	1	1	logica	0	724	107	6	220	1.42	195	1.43	536	1.38	435	1.42	362	1.92	559	1.33	580	1.76
22	mouth	1	1	merito	0	512	141	6	232	1.38	235	1.67	489	1.41	352	1.23	382	1.82	556	1.5	450	1.81
22	mouth	1	2	minerale	0	560	9	8	627	0.88	538	1.46	447	1.71	396	1	505	2.09	174	1.08	388	1.26
22	mouth	1	2	oca	0	491	29	3	685	0.54	700	0	468	2.21	150	0.52	659	1.08	106	0.24	197	1.33
22	mouth	1	3	orrore	0	675	77	6	305	1.29	356	1.74	491	1.78	400	1.38	475	1.8	450	1.71	363	1.71
22	hand	1	1	ozio	0	509	9	4	268	1.43	384	1.91	445	1.99	450	1.33	494	1.69	480	1.79	568	0.95
22	hand	1	2	palude	0	520	12	6	645	0.77	613	1.13	332	1.93	341	0.95	578	1.65	175	0.9	310	2.05
22	hand	1	3	pericolo	0	560	250	8	323	1.5	361	1.85	511	1.85	231	0.7	506	1.77	394	1.37	397	1.51
22	mouth	1	1	reputazione	0	709	27	11	215	1.01	213	1.39	411	1.76	569	0.95	282	1.85	594	1.2	619	1
22	mouth	1	3	stupore	0	660	62	7	339	1.61	440	1.68	515	1.37	366	1.18	422	1.83	496	1.55	500	1.69
22	hand	1	2	telegrafo	0	654	3	9	614	1.46	556	1.44	321	1.75	438	1.28	455	2.35	153	1.24	531	1.25
22	hand	1	1	tendenza	0	700	161	8	169	0.87	184	1.12	455	1.9	530	1.69	294	1.76	591	1.4	604	1.06
22	hand	1	3	terrore	0	520	96	7	297	1.38	408	1.87	421	1.93	326	1.08	488	1.71	455	1.7	463	2.11
22	hand	1	2	torre	0	501	44	5	656	0.63	674	0.45	423	2.02	245	0.89	579	1.63	129	0.76	228	1.59
22	hand	1	3	tradimento	0	560	73	10	363	1.2	300	1.83	464	2.05	415	1.18	485	1.88	418	1.49	432	2.04
22	hand	1	2	trattore	0	528	2	8	685	0.44	672	0.74	482	2.11	209	0.75	669	0.6	105	0.22	216	1.68
22	mouth	1	1	unanimità	1		37	8	241	1.46	308	2.1	306	1.6	512	1.25	369	1.62	545	1.73	632	1.11
23	mouth	1	3	abbandono	0	554	91	9	297	1.55	300	1.73	397	1.79	374	1.52	413	1.71	455	1.93	505	1.65
23	mouth	1	1	affermazione	0	792	59	12	274	1.85	265	1.76	516	1.38	424	1.09	376	1.86	375	1.61	425	1.56
23	hand	1	3	agitazione	0	668	25	10	413	1.5	311	1.56	541	1.75	320	1.44	497	1.82	441	1.54	364	2.04
23	hand	1	3	agonia	0	858	29	6	294	1.39	332	1.6	305	1.42	480	1.51	444	1.99	476	1.69	600	1.32
23	hand	1	2	alghe	0	733	24	5	669	0.62	657	0.73	422	1.93	269	0.6	641	1.48	121	0.54	225	1.34
23	mouth	1	2	alveare	0	753	11	7	679	0.42	674	0.57	421	2.32	267	1.02	609	1.44	150	0.73	363	1.74
23	hand	1	1	analogia	0	670	8	8	206	1.34	327	1.79	418	1.55	539	0.95	313	2.1	517	1.55	620	1.2
23	mouth	1	2	canoa	0	587	25	5	679	0.59	688	0.33	440	2.13	335	1.18	600	1.14	114	0.36	288	1.57
23	hand	1	2	circo	0	477	43	5	616	1.16	660	0.74	453	1.83	228	0.63	626	0.92	179	0.88	205	1
23	hand	1	1	circostanza	0	779	70	11	273	1.7	228	1.49	412	1.73	479	1.23	331	2.09	485	1.31	642	0.61
23	mouth	1	1	concetto	0	718	118	8	168	0.99	224	1.5	509	1.69	426	0.92	315	2.06	635	1.3	544	1.71
23	mouth	1	3	conflitto	0	693	140	9	304	1.25	348	1.81	416	2.19	444	1.15	432	1.87	424	1.1	553	1.39
23	hand	1	2	cravatta	0	486	38	8	694	0.24	688	0.44	552	1.87	250	0.93	675	0.58	105	0.22	200	1.2
23	mouth	1	3	disperazione	0	835	101	12	311	1.55	428	1.74	505	1.61	389	1.35	501	1.86	459	1.43	427	1.96
23	mouth	1	2	elefante	0	895	36	8	669	0.6	695	0.23	482	1.77	210	0.79	618	1.45	100	0	296	1.9
23	hand	1	3	emergenza	0	711	161	9	315	1.64	348	1.9	500	1.6	400	1.21	474	1.88	456	1.37	509	1.42
23	mouth	1	2	falce	0	576	5	5	662	0.82	632	1.3	387	1.85	365	1.04	575	1.7	129	0.56	288	1.32
23	mouth	1	3	fallimento	0	728	99	10	344	1.59	263	1.74	455	1.8	420	1.28	400	1.94	450	1.69	520	1.85
23	mouth	1	1	fascino	0	451	149	7	246	1.56	430	1.33	495	1.75	475	1.18	476	1.83	535	1.28	550	1.44
23	mouth	1	2	flotta	0	640	35	6	600	1.2	644	0.75	442	1.71	330	0.95	582	1.66	163	0.72	375	1.9
23	hand	1	3	fremito	0	721	11	7	335	1.79	312	1.84	273	1.33	516	1.26	304	2.03	390	1.95	600	1.44
23	hand	1	1	funzione	0	544	185	8	273	1.33	274	1.97	414	1.34	420	1.64	341	1.89	465	1.86	592	1.5
23	mouth	1	2	gallo	0	509	12	5	700	0	695	0.23	486	1.74	215	0.75	600	1.39	112	0.54	212	1.48
23	hand	1	2	giraffa	0	719	1	7	681	0.49	674	0.69	463	2.39	181	0.54	644	1.42	106	0.24	306	1.78
23	hand	1	3	giuramento	0	635	13	10	309	1.5	344	1.91	393	1.44	400	1.12	417	1.76	400	1.9	553	1.21
23	mouth	1	3	impulso	0	548	50	7	300	1.63	300	1.89	437	1.92	452	1.28	338	1.84	506	1	463	1.56
23	hand	1	1	indiscrezione	0	976	16	13	188	0.99	191	1.16	395	1.9	556	1.15	303	1.71	562	1.26	616	1.49
23	hand	1	1	inefficienza	0	1150	17	12	245	1.3	274	1.56	418	1.87	521	1.14	345	1.88	515	1.69	563	1.71
23	hand	1	1	inesperienza	0	1009	5	12	232	1.19	220	1.42	427	1.83	458	1.32	355	1.77	550	1.48	556	1.54
23	mouth	1	1	insufficienza	0	637	15	13	265	1.67	230	1.55	416	2.03	363	1.2	388	2.09	526	1.42	503	1.49
23	mouth	1	3	ira	0	449	45	3	296	1.43	391	1.98	395	2.07	400	1.21	382	1.71	474	1.42	491	1.55
23	mouth	1	1	logica	0	610	107	6	220	1.42	195	1.43	536	1.38	435	1.42	362	1.92	559	1.33	580	1.76
23	mouth	1	1	merito	0	566	141	6	232	1.38	235	1.67	489	1.41	352	1.23	382	1.82	556	1.5	450	1.81
23	mouth	1	2	minerale	0	734	9	8	627	0.88	538	1.46	447	1.71	396	1	505	2.09	174	1.08	388	1.26
23	mouth	1	2	oca	0	515	29	3	685	0.54	700	0	468	2.21	150	0.52	659	1.08	106	0.24	197	1.33
23	mouth	1	3	orrore	0	785	77	6	305	1.29	356	1.74	491	1.78	400	1.38	475	1.8	450	1.71	363	1.71
23	hand	1	1	ozio	0	479	9	4	268	1.43	384	1.91	445	1.99	450	1.33	494	1.69	480	1.79	568	0.95
23	hand	1	2	palude	0	611	12	6	645	0.77	613	1.13	332	1.93	341	0.95	578	1.65	175	0.9	310	2.05
23	hand	1	3	pericolo	0	507	250	8	323	1.5	361	1.85	511	1.85	231	0.7	506	1.77	394	1.37	397	1.51
23	mouth	1	1	reputazione	0	993	27	11	215	1.01	213	1.39	411	1.76	569	0.95	282	1.85	594	1.2	619	1
23	mouth	1	3	stupore	0	566	62	7	339	1.61	440	1.68	515	1.37	366	1.18	422	1.83	496	1.55	500	1.69
23	hand	1	2	telegrafo	0	675	3	9	614	1.46	556	1.44	321	1.75	438	1.28	455	2.35	153	1.24	531	1.25
23	hand	1	1	tendenza	0	620	161	8	169	0.87	184	1.12	455	1.9	530	1.69	294	1.76	591	1.4	604	1.06
23	hand	1	3	terrore	0	479	96	7	297	1.38	408	1.87	421	1.93	326	1.08	488	1.71	455	1.7	463	2.11
23	hand	1	2	torre	0	573	44	5	656	0.63	674	0.45	423	2.02	245	0.89	579	1.63	129	0.76	228	1.59
23	hand	1	3	tradimento	0	758	73	10	363	1.2	300	1.83	464	2.05	415	1.18	485	1.88	418	1.49	432	2.04
23	hand	1	2	trattore	0	583	2	8	685	0.44	672	0.74	482	2.11	209	0.75	669	0.6	105	0.22	216	1.68
23	mouth	1	1	unanimità	0	1176	37	8	241	1.46	308	2.1	306	1.6	512	1.25	369	1.62	545	1.73	632	1.11
24	mouth	1	3	abbandono	0	1065	91	9	297	1.55	300	1.73	397	1.79	374	1.52	413	1.71	455	1.93	505	1.65
24	mouth	1	1	affermazione	0	947	59	12	274	1.85	265	1.76	516	1.38	424	1.09	376	1.86	375	1.61	425	1.56
24	hand	1	3	agitazione	0	829	25	10	413	1.5	311	1.56	541	1.75	320	1.44	497	1.82	441	1.54	364	2.04
24	hand	1	3	agonia	0	618	29	6	294	1.39	332	1.6	305	1.42	480	1.51	444	1.99	476	1.69	600	1.32
24	hand	1	2	alghe	0	1003	24	5	669	0.62	657	0.73	422	1.93	269	0.6	641	1.48	121	0.54	225	1.34
24	mouth	1	2	alveare	0	726	11	7	679	0.42	674	0.57	421	2.32	267	1.02	609	1.44	150	0.73	363	1.74
24	hand	1	1	analogia	0	687	8	8	206	1.34	327	1.79	418	1.55	539	0.95	313	2.1	517	1.55	620	1.2
24	mouth	1	2	canoa	0	600	25	5	679	0.59	688	0.33	440	2.13	335	1.18	600	1.14	114	0.36	288	1.57
24	hand	1	2	circo	0	728	43	5	616	1.16	660	0.74	453	1.83	228	0.63	626	0.92	179	0.88	205	1
24	hand	1	1	circostanza	0	790	70	11	273	1.7	228	1.49	412	1.73	479	1.23	331	2.09	485	1.31	642	0.61
24	mouth	1	1	concetto	0	796	118	8	168	0.99	224	1.5	509	1.69	426	0.92	315	2.06	635	1.3	544	1.71
24	mouth	1	3	conflitto	0	833	140	9	304	1.25	348	1.81	416	2.19	444	1.15	432	1.87	424	1.1	553	1.39
24	hand	1	2	cravatta	0	1063	38	8	694	0.24	688	0.44	552	1.87	250	0.93	675	0.58	105	0.22	200	1.2
24	mouth	1	3	disperazione	0	654	101	12	311	1.55	428	1.74	505	1.61	389	1.35	501	1.86	459	1.43	427	1.96
24	mouth	1	2	elefante	0	605	36	8	669	0.6	695	0.23	482	1.77	210	0.79	618	1.45	100	0	296	1.9
24	hand	1	3	emergenza	0	1391	161	9	315	1.64	348	1.9	500	1.6	400	1.21	474	1.88	456	1.37	509	1.42
24	mouth	1	2	falce	1		5	5	662	0.82	632	1.3	387	1.85	365	1.04	575	1.7	129	0.56	288	1.32
24	mouth	1	3	fallimento	0	611	99	10	344	1.59	263	1.74	455	1.8	420	1.28	400	1.94	450	1.69	520	1.85
24	mouth	1	1	fascino	0	638	149	7	246	1.56	430	1.33	495	1.75	475	1.18	476	1.83	535	1.28	550	1.44
24	mouth	1	2	flotta	0	777	35	6	600	1.2	644	0.75	442	1.71	330	0.95	582	1.66	163	0.72	375	1.9
24	hand	1	3	fremito	1		11	7	335	1.79	312	1.84	273	1.33	516	1.26	304	2.03	390	1.95	600	1.44
24	hand	1	1	funzione	0	779	185	8	273	1.33	274	1.97	414	1.34	420	1.64	341	1.89	465	1.86	592	1.5
24	mouth	1	2	gallo	0	1010	12	5	700	0	695	0.23	486	1.74	215	0.75	600	1.39	112	0.54	212	1.48
24	hand	1	2	giraffa	0	855	1	7	681	0.49	674	0.69	463	2.39	181	0.54	644	1.42	106	0.24	306	1.78
24	hand	1	3	giuramento	0	760	13	10	309	1.5	344	1.91	393	1.44	400	1.12	417	1.76	400	1.9	553	1.21
24	mouth	1	3	impulso	1		50	7	300	1.63	300	1.89	437	1.92	452	1.28	338	1.84	506	1	463	1.56
24	hand	1	1	indiscrezione	0	846	16	13	188	0.99	191	1.16	395	1.9	556	1.15	303	1.71	562	1.26	616	1.49
24	hand	1	1	inefficienza	0	809	17	12	245	1.3	274	1.56	418	1.87	521	1.14	345	1.88	515	1.69	563	1.71
24	hand	1	1	inesperienza	0	1024	5	12	232	1.19	220	1.42	427	1.83	458	1.32	355	1.77	550	1.48	556	1.54
24	mouth	1	1	insufficienza	0	1369	15	13	265	1.67	230	1.55	416	2.03	363	1.2	388	2.09	526	1.42	503	1.49
24	mouth	1	3	ira	0	958	45	3	296	1.43	391	1.98	395	2.07	400	1.21	382	1.71	474	1.42	491	1.55
24	mouth	1	1	logica	0	669	107	6	220	1.42	195	1.43	536	1.38	435	1.42	362	1.92	559	1.33	580	1.76
24	mouth	1	1	merito	0	816	141	6	232	1.38	235	1.67	489	1.41	352	1.23	382	1.82	556	1.5	450	1.81
24	mouth	1	2	minerale	0	702	9	8	627	0.88	538	1.46	447	1.71	396	1	505	2.09	174	1.08	388	1.26
24	mouth	1	2	oca	0	670	29	3	685	0.54	700	0	468	2.21	150	0.52	659	1.08	106	0.24	197	1.33
24	mouth	1	3	orrore	0	1304	77	6	305	1.29	356	1.74	491	1.78	400	1.38	475	1.8	450	1.71	363	1.71
24	hand	1	1	ozio	1		9	4	268	1.43	384	1.91	445	1.99	450	1.33	494	1.69	480	1.79	568	0.95
24	hand	1	2	palude	0	758	12	6	645	0.77	613	1.13	332	1.93	341	0.95	578	1.65	175	0.9	310	2.05
24	hand	1	3	pericolo	0	695	250	8	323	1.5	361	1.85	511	1.85	231	0.7	506	1.77	394	1.37	397	1.51
24	mouth	1	1	reputazione	0	1177	27	11	215	1.01	213	1.39	411	1.76	569	0.95	282	1.85	594	1.2	619	1
24	mouth	1	3	stupore	0	607	62	7	339	1.61	440	1.68	515	1.37	366	1.18	422	1.83	496	1.55	500	1.69
24	hand	1	2	telegrafo	0	901	3	9	614	1.46	556	1.44	321	1.75	438	1.28	455	2.35	153	1.24	531	1.25
24	hand	1	1	tendenza	0	684	161	8	169	0.87	184	1.12	455	1.9	530	1.69	294	1.76	591	1.4	604	1.06
24	hand	1	3	terrore	0	1215	96	7	297	1.38	408	1.87	421	1.93	326	1.08	488	1.71	455	1.7	463	2.11
24	hand	1	2	torre	0	746	44	5	656	0.63	674	0.45	423	2.02	245	0.89	579	1.63	129	0.76	228	1.59
24	hand	1	3	tradimento	0	697	73	10	363	1.2	300	1.83	464	2.05	415	1.18	485	1.88	418	1.49	432	2.04
24	hand	1	2	trattore	0	791	2	8	685	0.44	672	0.74	482	2.11	209	0.75	669	0.6	105	0.22	216	1.68
24	mouth	1	1	unanimità	0	1422	37	8	241	1.46	308	2.1	306	1.6	512	1.25	369	1.62	545	1.73	632	1.11
25	mouth	1	3	abbandono	0	1002	91	9	297	1.55	300	1.73	397	1.79	374	1.52	413	1.71	455	1.93	505	1.65
25	mouth	1	1	affermazione	0	726	59	12	274	1.85	265	1.76	516	1.38	424	1.09	376	1.86	375	1.61	425	1.56
25	hand	1	3	agitazione	0	714	25	10	413	1.5	311	1.56	541	1.75	320	1.44	497	1.82	441	1.54	364	2.04
25	hand	1	3	agonia	0	579	29	6	294	1.39	332	1.6	305	1.42	480	1.51	444	1.99	476	1.69	600	1.32
25	hand	1	2	alghe	0	759	24	5	669	0.62	657	0.73	422	1.93	269	0.6	641	1.48	121	0.54	225	1.34
25	mouth	1	2	alveare	0	853	11	7	679	0.42	674	0.57	421	2.32	267	1.02	609	1.44	150	0.73	363	1.74
25	hand	1	1	analogia	0	795	8	8	206	1.34	327	1.79	418	1.55	539	0.95	313	2.1	517	1.55	620	1.2
25	mouth	1	2	canoa	0	678	25	5	679	0.59	688	0.33	440	2.13	335	1.18	600	1.14	114	0.36	288	1.57
25	hand	1	2	circo	0	512	43	5	616	1.16	660	0.74	453	1.83	228	0.63	626	0.92	179	0.88	205	1
25	hand	1	1	circostanza	0	786	70	11	273	1.7	228	1.49	412	1.73	479	1.23	331	2.09	485	1.31	642	0.61
25	mouth	1	1	concetto	0	604	118	8	168	0.99	224	1.5	509	1.69	426	0.92	315	2.06	635	1.3	544	1.71
25	mouth	1	3	conflitto	0	1206	140	9	304	1.25	348	1.81	416	2.19	444	1.15	432	1.87	424	1.1	553	1.39
25	hand	1	2	cravatta	0	1241	38	8	694	0.24	688	0.44	552	1.87	250	0.93	675	0.58	105	0.22	200	1.2
25	mouth	1	3	disperazione	0	726	101	12	311	1.55	428	1.74	505	1.61	389	1.35	501	1.86	459	1.43	427	1.96
25	mouth	1	2	elefante	0	756	36	8	669	0.6	695	0.23	482	1.77	210	0.79	618	1.45	100	0	296	1.9
25	hand	1	3	emergenza	0	712	161	9	315	1.64	348	1.9	500	1.6	400	1.21	474	1.88	456	1.37	509	1.42
25	mouth	1	2	falce	0	1047	5	5	662	0.82	632	1.3	387	1.85	365	1.04	575	1.7	129	0.56	288	1.32
25	mouth	1	3	fallimento	0	1187	99	10	344	1.59	263	1.74	455	1.8	420	1.28	400	1.94	450	1.69	520	1.85
25	mouth	1	1	fascino	0	781	149	7	246	1.56	430	1.33	495	1.75	475	1.18	476	1.83	535	1.28	550	1.44
25	mouth	1	2	flotta	0	729	35	6	600	1.2	644	0.75	442	1.71	330	0.95	582	1.66	163	0.72	375	1.9
25	hand	1	3	fremito	0	706	11	7	335	1.79	312	1.84	273	1.33	516	1.26	304	2.03	390	1.95	600	1.44
25	hand	1	1	funzione	0	753	185	8	273	1.33	274	1.97	414	1.34	420	1.64	341	1.89	465	1.86	592	1.5
25	mouth	1	2	gallo	0	648	12	5	700	0	695	0.23	486	1.74	215	0.75	600	1.39	112	0.54	212	1.48
25	hand	1	2	giraffa	0	966	1	7	681	0.49	674	0.69	463	2.39	181	0.54	644	1.42	106	0.24	306	1.78
25	hand	1	3	giuramento	0	670	13	10	309	1.5	344	1.91	393	1.44	400	1.12	417	1.76	400	1.9	553	1.21
25	mouth	1	3	impulso	0	898	50	7	300	1.63	300	1.89	437	1.92	452	1.28	338	1.84	506	1	463	1.56
25	hand	1	1	indiscrezione	0	714	16	13	188	0.99	191	1.16	395	1.9	556	1.15	303	1.71	562	1.26	616	1.49
25	hand	1	1	inefficienza	0	882	17	12	245	1.3	274	1.56	418	1.87	521	1.14	345	1.88	515	1.69	563	1.71
25	hand	1	1	inesperienza	0	1109	5	12	232	1.19	220	1.42	427	1.83	458	1.32	355	1.77	550	1.48	556	1.54
25	mouth	1	1	insufficienza	0	795	15	13	265	1.67	230	1.55	416	2.03	363	1.2	388	2.09	526	1.42	503	1.49
25	mouth	1	3	ira	0	759	45	3	296	1.43	391	1.98	395	2.07	400	1.21	382	1.71	474	1.42	491	1.55
25	mouth	1	1	logica	0	723	107	6	220	1.42	195	1.43	536	1.38	435	1.42	362	1.92	559	1.33	580	1.76
25	mouth	1	1	merito	0	683	141	6	232	1.38	235	1.67	489	1.41	352	1.23	382	1.82	556	1.5	450	1.81
25	mouth	1	2	minerale	0	652	9	8	627	0.88	538	1.46	447	1.71	396	1	505	2.09	174	1.08	388	1.26
25	mouth	1	2	oca	0	837	29	3	685	0.54	700	0	468	2.21	150	0.52	659	1.08	106	0.24	197	1.33
25	mouth	1	3	orrore	0	596	77	6	305	1.29	356	1.74	491	1.78	400	1.38	475	1.8	450	1.71	363	1.71
25	hand	1	1	ozio	0	780	9	4	268	1.43	384	1.91	445	1.99	450	1.33	494	1.69	480	1.79	568	0.95
25	hand	1	2	palude	0	553	12	6	645	0.77	613	1.13	332	1.93	341	0.95	578	1.65	175	0.9	310	2.05
25	hand	1	3	pericolo	0	510	250	8	323	1.5	361	1.85	511	1.85	231	0.7	506	1.77	394	1.37	397	1.51
25	mouth	1	1	reputazione	0	876	27	11	215	1.01	213	1.39	411	1.76	569	0.95	282	1.85	594	1.2	619	1
25	mouth	1	3	stupore	0	690	62	7	339	1.61	440	1.68	515	1.37	366	1.18	422	1.83	496	1.55	500	1.69
25	hand	1	2	telegrafo	0	634	3	9	614	1.46	556	1.44	321	1.75	438	1.28	455	2.35	153	1.24	531	1.25
25	hand	1	1	tendenza	0	655	161	8	169	0.87	184	1.12	455	1.9	530	1.69	294	1.76	591	1.4	604	1.06
25	hand	1	3	terrore	0	670	96	7	297	1.38	408	1.87	421	1.93	326	1.08	488	1.71	455	1.7	463	2.11
25	hand	1	2	torre	0	716	44	5	656	0.63	674	0.45	423	2.02	245	0.89	579	1.63	129	0.76	228	1.59
25	hand	1	3	tradimento	0	614	73	10	363	1.2	300	1.83	464	2.05	415	1.18	485	1.88	418	1.49	432	2.04
25	hand	1	2	trattore	0	663	2	8	685	0.44	672	0.74	482	2.11	209	0.75	669	0.6	105	0.22	216	1.68
25	mouth	1	1	unanimità	0	1251	37	8	241	1.46	308	2.1	306	1.6	512	1.25	369	1.62	545	1.73	632	1.11
26	hand	1	3	abbandono	0	911	91	9	297	1.55	300	1.73	397	1.79	374	1.52	413	1.71	455	1.93	505	1.65
26	hand	1	1	affermazione	0	878	59	12	274	1.85	265	1.76	516	1.38	424	1.09	376	1.86	375	1.61	425	1.56
26	mouth	1	3	agitazione	0	630	25	10	413	1.5	311	1.56	541	1.75	320	1.44	497	1.82	441	1.54	364	2.04
26	mouth	1	3	agonia	0	524	29	6	294	1.39	332	1.6	305	1.42	480	1.51	444	1.99	476	1.69	600	1.32
26	mouth	1	2	alghe	0	620	24	5	669	0.62	657	0.73	422	1.93	269	0.6	641	1.48	121	0.54	225	1.34
26	hand	1	2	alveare	0	669	11	7	679	0.42	674	0.57	421	2.32	267	1.02	609	1.44	150	0.73	363	1.74
26	mouth	1	1	analogia	0	769	8	8	206	1.34	327	1.79	418	1.55	539	0.95	313	2.1	517	1.55	620	1.2
26	hand	1	2	canoa	0	1096	25	5	679	0.59	688	0.33	440	2.13	335	1.18	600	1.14	114	0.36	288	1.57
26	mouth	1	2	circo	0	601	43	5	616	1.16	660	0.74	453	1.83	228	0.63	626	0.92	179	0.88	205	1
26	mouth	1	1	circostanza	0	674	70	11	273	1.7	228	1.49	412	1.73	479	1.23	331	2.09	485	1.31	642	0.61
26	hand	1	1	concetto	0	800	118	8	168	0.99	224	1.5	509	1.69	426	0.92	315	2.06	635	1.3	544	1.71
26	hand	1	3	conflitto	0	621	140	9	304	1.25	348	1.81	416	2.19	444	1.15	432	1.87	424	1.1	553	1.39
26	mouth	1	2	cravatta	0	743	38	8	694	0.24	688	0.44	552	1.87	250	0.93	675	0.58	105	0.22	200	1.2
26	hand	1	3	disperazione	0	938	101	12	311	1.55	428	1.74	505	1.61	389	1.35	501	1.86	459	1.43	427	1.96
26	hand	1	2	elefante	0	504	36	8	669	0.6	695	0.23	482	1.77	210	0.79	618	1.45	100	0	296	1.9
26	mouth	1	3	emergenza	0	793	161	9	315	1.64	348	1.9	500	1.6	400	1.21	474	1.88	456	1.37	509	1.42
26	hand	1	2	falce	0	767	5	5	662	0.82	632	1.3	387	1.85	365	1.04	575	1.7	129	0.56	288	1.32
26	hand	1	3	fallimento	0	617	99	10	344	1.59	263	1.74	455	1.8	420	1.28	400	1.94	450	1.69	520	1.85
26	hand	1	1	fascino	0	852	149	7	246	1.56	430	1.33	495	1.75	475	1.18	476	1.83	535	1.28	550	1.44
26	hand	1	2	flotta	0	654	35	6	600	1.2	644	0.75	442	1.71	330	0.95	582	1.66	163	0.72	375	1.9
26	mouth	1	3	fremito	0	700	11	7	335	1.79	312	1.84	273	1.33	516	1.26	304	2.03	390	1.95	600	1.44
26	mouth	1	1	funzione	0	653	185	8	273	1.33	274	1.97	414	1.34	420	1.64	341	1.89	465	1.86	592	1.5
26	hand	1	2	gallo	0	684	12	5	700	0	695	0.23	486	1.74	215	0.75	600	1.39	112	0.54	212	1.48
26	mouth	1	2	giraffa	0	499	1	7	681	0.49	674	0.69	463	2.39	181	0.54	644	1.42	106	0.24	306	1.78
26	mouth	1	3	giuramento	0	550	13	10	309	1.5	344	1.91	393	1.44	400	1.12	417	1.76	400	1.9	553	1.21
26	hand	1	3	impulso	0	668	50	7	300	1.63	300	1.89	437	1.92	452	1.28	338	1.84	506	1	463	1.56
26	mouth	1	1	indiscrezione	0	1189	16	13	188	0.99	191	1.16	395	1.9	556	1.15	303	1.71	562	1.26	616	1.49
26	mouth	1	1	inefficienza	0	924	17	12	245	1.3	274	1.56	418	1.87	521	1.14	345	1.88	515	1.69	563	1.71
26	mouth	1	1	inesperienza	0	1342	5	12	232	1.19	220	1.42	427	1.83	458	1.32	355	1.77	550	1.48	556	1.54
26	hand	1	1	insufficienza	0	1109	15	13	265	1.67	230	1.55	416	2.03	363	1.2	388	2.09	526	1.42	503	1.49
26	hand	1	3	ira	0	610	45	3	296	1.43	391	1.98	395	2.07	400	1.21	382	1.71	474	1.42	491	1.55
26	hand	1	1	logica	0	610	107	6	220	1.42	195	1.43	536	1.38	435	1.42	362	1.92	559	1.33	580	1.76
26	hand	1	1	merito	0	534	141	6	232	1.38	235	1.67	489	1.41	352	1.23	382	1.82	556	1.5	450	1.81
26	hand	1	2	minerale	0	822	9	8	627	0.88	538	1.46	447	1.71	396	1	505	2.09	174	1.08	388	1.26
26	hand	1	2	oca	0	610	29	3	685	0.54	700	0	468	2.21	150	0.52	659	1.08	106	0.24	197	1.33
26	hand	1	3	orrore	0	1047	77	6	305	1.29	356	1.74	491	1.78	400	1.38	475	1.8	450	1.71	363	1.71
26	mouth	1	1	ozio	0	561	9	4	268	1.43	384	1.91	445	1.99	450	1.33	494	1.69	480	1.79	568	0.95
26	mouth	1	2	palude	0	722	12	6	645	0.77	613	1.13	332	1.93	341	0.95	578	1.65	175	0.9	310	2.05
26	mouth	1	3	pericolo	0	664	250	8	323	1.5	361	1.85	511	1.85	231	0.7	506	1.77	394	1.37	397	1.51
26	hand	1	1	reputazione	0	763	27	11	215	1.01	213	1.39	411	1.76	569	0.95	282	1.85	594	1.2	619	1
26	hand	1	3	stupore	0	567	62	7	339	1.61	440	1.68	515	1.37	366	1.18	422	1.83	496	1.55	500	1.69
26	mouth	1	2	telegrafo	0	827	3	9	614	1.46	556	1.44	321	1.75	438	1.28	455	2.35	153	1.24	531	1.25
26	mouth	1	1	tendenza	0	542	161	8	169	0.87	184	1.12	455	1.9	530	1.69	294	1.76	591	1.4	604	1.06
26	mouth	1	3	terrore	0	598	96	7	297	1.38	408	1.87	421	1.93	326	1.08	488	1.71	455	1.7	463	2.11
26	mouth	1	2	torre	0	799	44	5	656	0.63	674	0.45	423	2.02	245	0.89	579	1.63	129	0.76	228	1.59
26	mouth	1	3	tradimento	0	685	73	10	363	1.2	300	1.83	464	2.05	415	1.18	485	1.88	418	1.49	432	2.04
26	mouth	1	2	trattore	0	672	2	8	685	0.44	672	0.74	482	2.11	209	0.75	669	0.6	105	0.22	216	1.68
26	hand	1	1	unanimità	0	1091	37	8	241	1.46	308	2.1	306	1.6	512	1.25	369	1.62	545	1.73	632	1.11
27	hand	1	3	abbandono	0	581	91	9	297	1.55	300	1.73	397	1.79	374	1.52	413	1.71	455	1.93	505	1.65
27	hand	1	1	affermazione	0	894	59	12	274	1.85	265	1.76	516	1.38	424	1.09	376	1.86	375	1.61	425	1.56
27	mouth	1	3	agitazione	0	586	25	10	413	1.5	311	1.56	541	1.75	320	1.44	497	1.82	441	1.54	364	2.04
27	mouth	1	3	agonia	0	699	29	6	294	1.39	332	1.6	305	1.42	480	1.51	444	1.99	476	1.69	600	1.32
27	mouth	1	2	alghe	0	643	24	5	669	0.62	657	0.73	422	1.93	269	0.6	641	1.48	121	0.54	225	1.34
27	hand	1	2	alveare	0	528	11	7	679	0.42	674	0.57	421	2.32	267	1.02	609	1.44	150	0.73	363	1.74
27	mouth	1	1	analogia	0	669	8	8	206	1.34	327	1.79	418	1.55	539	0.95	313	2.1	517	1.55	620	1.2
27	hand	1	2	canoa	0	598	25	5	679	0.59	688	0.33	440	2.13	335	1.18	600	1.14	114	0.36	288	1.57
27	mouth	1	2	circo	0	695	43	5	616	1.16	660	0.74	453	1.83	228	0.63	626	0.92	179	0.88	205	1
27	mouth	1	1	circostanza	0	911	70	11	273	1.7	228	1.49	412	1.73	479	1.23	331	2.09	485	1.31	642	0.61
27	hand	1	1	concetto	0	511	118	8	168	0.99	224	1.5	509	1.69	426	0.92	315	2.06	635	1.3	544	1.71
27	hand	1	3	conflitto	0	563	140	9	304	1.25	348	1.81	416	2.19	444	1.15	432	1.87	424	1.1	553	1.39
27	mouth	1	2	cravatta	0	733	38	8	694	0.24	688	0.44	552	1.87	250	0.93	675	0.58	105	0.22	200	1.2
27	hand	1	3	disperazione	0	568	101	12	311	1.55	428	1.74	505	1.61	389	1.35	501	1.86	459	1.43	427	1.96
27	hand	1	2	elefante	0	550	36	8	669	0.6	695	0.23	482	1.77	210	0.79	618	1.45	100	0	296	1.9
27	mouth	1	3	emergenza	0	678	161	9	315	1.64	348	1.9	500	1.6	400	1.21	474	1.88	456	1.37	509	1.42
27	hand	1	2	falce	0	649	5	5	662	0.82	632	1.3	387	1.85	365	1.04	575	1.7	129	0.56	288	1.32
27	hand	1	3	fallimento	0	651	99	10	344	1.59	263	1.74	455	1.8	420	1.28	400	1.94	450	1.69	520	1.85
27	hand	1	1	fascino	0	549	149	7	246	1.56	430	1.33	495	1.75	475	1.18	476	1.83	535	1.28	550	1.44
27	hand	1	2	flotta	0	570	35	6	600	1.2	644	0.75	442	1.71	330	0.95	582	1.66	163	0.72	375	1.9
27	mouth	1	3	fremito	0	790	11	7	335	1.79	312	1.84	273	1.33	516	1.26	304	2.03	390	1.95	600	1.44
27	mouth	1	1	funzione	0	708	185	8	273	1.33	274	1.97	414	1.34	420	1.64	341	1.89	465	1.86	592	1.5
27	hand	1	2	gallo	0	605	12	5	700	0	695	0.23	486	1.74	215	0.75	600	1.39	112	0.54	212	1.48
27	mouth	1	2	giraffa	0	585	1	7	681	0.49	674	0.69	463	2.39	181	0.54	644	1.42	106	0.24	306	1.78
27	mouth	1	3	giuramento	0	587	13	10	309	1.5	344	1.91	393	1.44	400	1.12	417	1.76	400	1.9	553	1.21
27	hand	1	3	impulso	0	544	50	7	300	1.63	300	1.89	437	1.92	452	1.28	338	1.84	506	1	463	1.56
27	mouth	1	1	indiscrezione	1		16	13	188	0.99	191	1.16	395	1.9	556	1.15	303	1.71	562	1.26	616	1.49
27	mouth	1	1	inefficienza	0	1205	17	12	245	1.3	274	1.56	418	1.87	521	1.14	345	1.88	515	1.69	563	1.71
27	mouth	1	1	inesperienza	0	918	5	12	232	1.19	220	1.42	427	1.83	458	1.32	355	1.77	550	1.48	556	1.54
27	hand	1	1	insufficienza	0	683	15	13	265	1.67	230	1.55	416	2.03	363	1.2	388	2.09	526	1.42	503	1.49
27	hand	1	3	ira	0	531	45	3	296	1.43	391	1.98	395	2.07	400	1.21	382	1.71	474	1.42	491	1.55
27	hand	1	1	logica	0	486	107	6	220	1.42	195	1.43	536	1.38	435	1.42	362	1.92	559	1.33	580	1.76
27	hand	1	1	merito	0	504	141	6	232	1.38	235	1.67	489	1.41	352	1.23	382	1.82	556	1.5	450	1.81
27	hand	1	2	minerale	0	518	9	8	627	0.88	538	1.46	447	1.71	396	1	505	2.09	174	1.08	388	1.26
27	hand	1	2	oca	0	537	29	3	685	0.54	700	0	468	2.21	150	0.52	659	1.08	106	0.24	197	1.33
27	hand	1	3	orrore	0	558	77	6	305	1.29	356	1.74	491	1.78	400	1.38	475	1.8	450	1.71	363	1.71
27	mouth	1	1	ozio	0	703	9	4	268	1.43	384	1.91	445	1.99	450	1.33	494	1.69	480	1.79	568	0.95
27	mouth	1	2	palude	0	656	12	6	645	0.77	613	1.13	332	1.93	341	0.95	578	1.65	175	0.9	310	2.05
27	mouth	1	3	pericolo	0	526	250	8	323	1.5	361	1.85	511	1.85	231	0.7	506	1.77	394	1.37	397	1.51
27	hand	1	1	reputazione	0	602	27	11	215	1.01	213	1.39	411	1.76	569	0.95	282	1.85	594	1.2	619	1
27	hand	1	3	stupore	0	540	62	7	339	1.61	440	1.68	515	1.37	366	1.18	422	1.83	496	1.55	500	1.69
27	mouth	1	2	telegrafo	0	701	3	9	614	1.46	556	1.44	321	1.75	438	1.28	455	2.35	153	1.24	531	1.25
27	mouth	1	1	tendenza	0	578	161	8	169	0.87	184	1.12	455	1.9	530	1.69	294	1.76	591	1.4	604	1.06
27	mouth	1	3	terrore	0	598	96	7	297	1.38	408	1.87	421	1.93	326	1.08	488	1.71	455	1.7	463	2.11
27	mouth	1	2	torre	0	714	44	5	656	0.63	674	0.45	423	2.02	245	0.89	579	1.63	129	0.76	228	1.59
27	mouth	1	3	tradimento	0	644	73	10	363	1.2	300	1.83	464	2.05	415	1.18	485	1.88	418	1.49	432	2.04
27	mouth	1	2	trattore	0	605	2	8	685	0.44	672	0.74	482	2.11	209	0.75	669	0.6	105	0.22	216	1.68
27	hand	1	1	unanimità	0	1229	37	8	241	1.46	308	2.1	306	1.6	512	1.25	369	1.62	545	1.73	632	1.11
28	mouth	1	3	abbandono	0	645	91	9	297	1.55	300	1.73	397	1.79	374	1.52	413	1.71	455	1.93	505	1.65
28	mouth	1	1	affermazione	0	507	59	12	274	1.85	265	1.76	516	1.38	424	1.09	376	1.86	375	1.61	425	1.56
28	hand	1	3	agitazione	0	475	25	10	413	1.5	311	1.56	541	1.75	320	1.44	497	1.82	441	1.54	364	2.04
28	hand	1	3	agonia	0	543	29	6	294	1.39	332	1.6	305	1.42	480	1.51	444	1.99	476	1.69	600	1.32
28	hand	1	2	alghe	0	529	24	5	669	0.62	657	0.73	422	1.93	269	0.6	641	1.48	121	0.54	225	1.34
28	mouth	1	2	alveare	0	620	11	7	679	0.42	674	0.57	421	2.32	267	1.02	609	1.44	150	0.73	363	1.74
28	hand	1	1	analogia	0	619	8	8	206	1.34	327	1.79	418	1.55	539	0.95	313	2.1	517	1.55	620	1.2
28	mouth	1	2	canoa	0	771	25	5	679	0.59	688	0.33	440	2.13	335	1.18	600	1.14	114	0.36	288	1.57
28	hand	1	2	circo	0	622	43	5	616	1.16	660	0.74	453	1.83	228	0.63	626	0.92	179	0.88	205	1
28	hand	1	1	circostanza	0	837	70	11	273	1.7	228	1.49	412	1.73	479	1.23	331	2.09	485	1.31	642	0.61
28	mouth	1	1	concetto	0	660	118	8	168	0.99	224	1.5	509	1.69	426	0.92	315	2.06	635	1.3	544	1.71
28	mouth	1	3	conflitto	0	653	140	9	304	1.25	348	1.81	416	2.19	444	1.15	432	1.87	424	1.1	553	1.39
28	hand	1	2	cravatta	0	569	38	8	694	0.24	688	0.44	552	1.87	250	0.93	675	0.58	105	0.22	200	1.2
28	mouth	1	3	disperazione	0	649	101	12	311	1.55	428	1.74	505	1.61	389	1.35	501	1.86	459	1.43	427	1.96
28	mouth	1	2	elefante	0	470	36	8	669	0.6	695	0.23	482	1.77	210	0.79	618	1.45	100	0	296	1.9
28	hand	1	3	emergenza	0	646	161	9	315	1.64	348	1.9	500	1.6	400	1.21	474	1.88	456	1.37	509	1.42
28	mouth	1	2	falce	0	859	5	5	662	0.82	632	1.3	387	1.85	365	1.04	575	1.7	129	0.56	288	1.32
28	mouth	1	3	fallimento	0	863	99	10	344	1.59	263	1.74	455	1.8	420	1.28	400	1.94	450	1.69	520	1.85
28	mouth	1	1	fascino	0	550	149	7	246	1.56	430	1.33	495	1.75	475	1.18	476	1.83	535	1.28	550	1.44
28	mouth	1	2	flotta	0	588	35	6	600	1.2	644	0.75	442	1.71	330	0.95	582	1.66	163	0.72	375	1.9
28	hand	1	3	fremito	0	606	11	7	335	1.79	312	1.84	273	1.33	516	1.26	304	2.03	390	1.95	600	1.44
28	hand	1	1	funzione	0	583	185	8	273	1.33	274	1.97	414	1.34	420	1.64	341	1.89	465	1.86	592	1.5
28	mouth	1	2	gallo	0	708	12	5	700	0	695	0.23	486	1.74	215	0.75	600	1.39	112	0.54	212	1.48
28	hand	1	2	giraffa	0	458	1	7	681	0.49	674	0.69	463	2.39	181	0.54	644	1.42	106	0.24	306	1.78
28	hand	1	3	giuramento	0	674	13	10	309	1.5	344	1.91	393	1.44	400	1.12	417	1.76	400	1.9	553	1.21
28	mouth	1	3	impulso	0	687	50	7	300	1.63	300	1.89	437	1.92	452	1.28	338	1.84	506	1	463	1.56
28	hand	1	1	indiscrezione	0	774	16	13	188	0.99	191	1.16	395	1.9	556	1.15	303	1.71	562	1.26	616	1.49
28	hand	1	1	inefficienza	0	626	17	12	245	1.3	274	1.56	418	1.87	521	1.14	345	1.88	515	1.69	563	1.71
28	hand	1	1	inesperienza	0	724	5	12	232	1.19	220	1.42	427	1.83	458	1.32	355	1.77	550	1.48	556	1.54
28	mouth	1	1	insufficienza	0	615	15	13	265	1.67	230	1.55	416	2.03	363	1.2	388	2.09	526	1.42	503	1.49
28	mouth	1	3	ira	0	1000	45	3	296	1.43	391	1.98	395	2.07	400	1.21	382	1.71	474	1.42	491	1.55
28	mouth	1	1	logica	0	731	107	6	220	1.42	195	1.43	536	1.38	435	1.42	362	1.92	559	1.33	580	1.76
28	mouth	1	1	merito	0	795	141	6	232	1.38	235	1.67	489	1.41	352	1.23	382	1.82	556	1.5	450	1.81
28	mouth	1	2	minerale	0	562	9	8	627	0.88	538	1.46	447	1.71	396	1	505	2.09	174	1.08	388	1.26
28	mouth	1	2	oca	0	548	29	3	685	0.54	700	0	468	2.21	150	0.52	659	1.08	106	0.24	197	1.33
28	mouth	1	3	orrore	0	477	77	6	305	1.29	356	1.74	491	1.78	400	1.38	475	1.8	450	1.71	363	1.71
28	hand	1	1	ozio	0	636	9	4	268	1.43	384	1.91	445	1.99	450	1.33	494	1.69	480	1.79	568	0.95
28	hand	1	2	palude	0	514	12	6	645	0.77	613	1.13	332	1.93	341	0.95	578	1.65	175	0.9	310	2.05
28	hand	1	3	pericolo	0	454	250	8	323	1.5	361	1.85	511	1.85	231	0.7	506	1.77	394	1.37	397	1.51
28	mouth	1	1	reputazione	0	665	27	11	215	1.01	213	1.39	411	1.76	569	0.95	282	1.85	594	1.2	619	1
28	mouth	1	3	stupore	0	489	62	7	339	1.61	440	1.68	515	1.37	366	1.18	422	1.83	496	1.55	500	1.69
28	hand	1	2	telegrafo	0	500	3	9	614	1.46	556	1.44	321	1.75	438	1.28	455	2.35	153	1.24	531	1.25
28	hand	1	1	tendenza	0	502	161	8	169	0.87	184	1.12	455	1.9	530	1.69	294	1.76	591	1.4	604	1.06
28	hand	1	3	terrore	0	619	96	7	297	1.38	408	1.87	421	1.93	326	1.08	488	1.71	455	1.7	463	2.11
28	hand	1	2	torre	0	444	44	5	656	0.63	674	0.45	423	2.02	245	0.89	579	1.63	129	0.76	228	1.59
28	hand	1	3	tradimento	0	636	73	10	363	1.2	300	1.83	464	2.05	415	1.18	485	1.88	418	1.49	432	2.04
28	hand	1	2	trattore	0	521	2	8	685	0.44	672	0.74	482	2.11	209	0.75	669	0.6	105	0.22	216	1.68
28	mouth	1	1	unanimità	0	996	37	8	241	1.46	308	2.1	306	1.6	512	1.25	369	1.62	545	1.73	632	1.11
29	mouth	1	3	abbandono	0	783	91	9	297	1.55	300	1.73	397	1.79	374	1.52	413	1.71	455	1.93	505	1.65
29	mouth	1	1	affermazione	0	820	59	12	274	1.85	265	1.76	516	1.38	424	1.09	376	1.86	375	1.61	425	1.56
29	hand	1	3	agitazione	0	804	25	10	413	1.5	311	1.56	541	1.75	320	1.44	497	1.82	441	1.54	364	2.04
29	hand	1	3	agonia	0	929	29	6	294	1.39	332	1.6	305	1.42	480	1.51	444	1.99	476	1.69	600	1.32
29	hand	1	2	alghe	0	781	24	5	669	0.62	657	0.73	422	1.93	269	0.6	641	1.48	121	0.54	225	1.34
29	mouth	1	2	alveare	0	1176	11	7	679	0.42	674	0.57	421	2.32	267	1.02	609	1.44	150	0.73	363	1.74
29	hand	1	1	analogia	0	751	8	8	206	1.34	327	1.79	418	1.55	539	0.95	313	2.1	517	1.55	620	1.2
29	mouth	1	2	canoa	0	906	25	5	679	0.59	688	0.33	440	2.13	335	1.18	600	1.14	114	0.36	288	1.57
29	hand	1	2	circo	0	770	43	5	616	1.16	660	0.74	453	1.83	228	0.63	626	0.92	179	0.88	205	1
29	hand	1	1	circostanza	0	1247	70	11	273	1.7	228	1.49	412	1.73	479	1.23	331	2.09	485	1.31	642	0.61
29	mouth	1	1	concetto	0	1038	118	8	168	0.99	224	1.5	509	1.69	426	0.92	315	2.06	635	1.3	544	1.71
29	mouth	1	3	conflitto	0	590	140	9	304	1.25	348	1.81	416	2.19	444	1.15	432	1.87	424	1.1	553	1.39
29	hand	1	2	cravatta	0	855	38	8	694	0.24	688	0.44	552	1.87	250	0.93	675	0.58	105	0.22	200	1.2
29	mouth	1	3	disperazione	0	955	101	12	311	1.55	428	1.74	505	1.61	389	1.35	501	1.86	459	1.43	427	1.96
29	mouth	1	2	elefante	0	687	36	8	669	0.6	695	0.23	482	1.77	210	0.79	618	1.45	100	0	296	1.9
29	hand	1	3	emergenza	0	781	161	9	315	1.64	348	1.9	500	1.6	400	1.21	474	1.88	456	1.37	509	1.42
29	mouth	1	2	falce	0	959	5	5	662	0.82	632	1.3	387	1.85	365	1.04	575	1.7	129	0.56	288	1.32
29	mouth	1	3	fallimento	0	870	99	10	344	1.59	263	1.74	455	1.8	420	1.28	400	1.94	450	1.69	520	1.85
29	mouth	1	1	fascino	0	786	149	7	246	1.56	430	1.33	495	1.75	475	1.18	476	1.83	535	1.28	550	1.44
29	mouth	1	2	flotta	0	1111	35	6	600	1.2	644	0.75	442	1.71	330	0.95	582	1.66	163	0.72	375	1.9
29	hand	1	3	fremito	0	830	11	7	335	1.79	312	1.84	273	1.33	516	1.26	304	2.03	390	1.95	600	1.44
29	hand	1	1	funzione	0	1091	185	8	273	1.33	274	1.97	414	1.34	420	1.64	341	1.89	465	1.86	592	1.5
29	mouth	1	2	gallo	0	970	12	5	700	0	695	0.23	486	1.74	215	0.75	600	1.39	112	0.54	212	1.48
29	hand	1	2	giraffa	0	606	1	7	681	0.49	674	0.69	463	2.39	181	0.54	644	1.42	106	0.24	306	1.78
29	hand	1	3	giuramento	0	830	13	10	309	1.5	344	1.91	393	1.44	400	1.12	417	1.76	400	1.9	553	1.21
29	mouth	1	3	impulso	0	597	50	7	300	1.63	300	1.89	437	1.92	452	1.28	338	1.84	506	1	463	1.56
29	hand	1	1	indiscrezione	0	1455	16	13	188	0.99	191	1.16	395	1.9	556	1.15	303	1.71	562	1.26	616	1.49
29	hand	1	1	inefficienza	1		17	12	245	1.3	274	1.56	418	1.87	521	1.14	345	1.88	515	1.69	563	1.71
29	hand	1	1	inesperienza	1		5	12	232	1.19	220	1.42	427	1.83	458	1.32	355	1.77	550	1.48	556	1.54
29	mouth	1	1	insufficienza	0	693	15	13	265	1.67	230	1.55	416	2.03	363	1.2	388	2.09	526	1.42	503	1.49
29	mouth	1	3	ira	0	575	45	3	296	1.43	391	1.98	395	2.07	400	1.21	382	1.71	474	1.42	491	1.55
29	mouth	1	1	logica	0	616	107	6	220	1.42	195	1.43	536	1.38	435	1.42	362	1.92	559	1.33	580	1.76
29	mouth	1	1	merito	0	720	141	6	232	1.38	235	1.67	489	1.41	352	1.23	382	1.82	556	1.5	450	1.81
29	mouth	1	2	minerale	0	791	9	8	627	0.88	538	1.46	447	1.71	396	1	505	2.09	174	1.08	388	1.26
29	mouth	1	2	oca	0	618	29	3	685	0.54	700	0	468	2.21	150	0.52	659	1.08	106	0.24	197	1.33
29	mouth	1	3	orrore	0	832	77	6	305	1.29	356	1.74	491	1.78	400	1.38	475	1.8	450	1.71	363	1.71
29	hand	1	1	ozio	0	760	9	4	268	1.43	384	1.91	445	1.99	450	1.33	494	1.69	480	1.79	568	0.95
29	hand	1	2	palude	0	860	12	6	645	0.77	613	1.13	332	1.93	341	0.95	578	1.65	175	0.9	310	2.05
29	hand	1	3	pericolo	0	888	250	8	323	1.5	361	1.85	511	1.85	231	0.7	506	1.77	394	1.37	397	1.51
29	mouth	1	1	reputazione	0	649	27	11	215	1.01	213	1.39	411	1.76	569	0.95	282	1.85	594	1.2	619	1
29	mouth	1	3	stupore	0	594	62	7	339	1.61	440	1.68	515	1.37	366	1.18	422	1.83	496	1.55	500	1.69
29	hand	1	2	telegrafo	0	816	3	9	614	1.46	556	1.44	321	1.75	438	1.28	455	2.35	153	1.24	531	1.25
29	hand	1	1	tendenza	0	1010	161	8	169	0.87	184	1.12	455	1.9	530	1.69	294	1.76	591	1.4	604	1.06
29	hand	1	3	terrore	0	711	96	7	297	1.38	408	1.87	421	1.93	326	1.08	488	1.71	455	1.7	463	2.11
29	hand	1	2	torre	0	911	44	5	656	0.63	674	0.45	423	2.02	245	0.89	579	1.63	129	0.76	228	1.59
29	hand	1	3	tradimento	0	706	73	10	363	1.2	300	1.83	464	2.05	415	1.18	485	1.88	418	1.49	432	2.04
29	hand	1	2	trattore	0	719	2	8	685	0.44	672	0.74	482	2.11	209	0.75	669	0.6	105	0.22	216	1.68
29	mouth	1	1	unanimità	0	1397	37	8	241	1.46	308	2.1	306	1.6	512	1.25	369	1.62	545	1.73	632	1.11
30	hand	1	3	abbandono	0	700	91	9	297	1.55	300	1.73	397	1.79	374	1.52	413	1.71	455	1.93	505	1.65
30	hand	1	1	affermazione	0	1033	59	12	274	1.85	265	1.76	516	1.38	424	1.09	376	1.86	375	1.61	425	1.56
30	mouth	1	3	agitazione	0	693	25	10	413	1.5	311	1.56	541	1.75	320	1.44	497	1.82	441	1.54	364	2.04
30	mouth	1	3	agonia	0	912	29	6	294	1.39	332	1.6	305	1.42	480	1.51	444	1.99	476	1.69	600	1.32
30	mouth	1	2	alghe	0	779	24	5	669	0.62	657	0.73	422	1.93	269	0.6	641	1.48	121	0.54	225	1.34
30	hand	1	2	alveare	0	651	11	7	679	0.42	674	0.57	421	2.32	267	1.02	609	1.44	150	0.73	363	1.74
30	mouth	1	1	analogia	0	1426	8	8	206	1.34	327	1.79	418	1.55	539	0.95	313	2.1	517	1.55	620	1.2
30	hand	1	2	canoa	0	604	25	5	679	0.59	688	0.33	440	2.13	335	1.18	600	1.14	114	0.36	288	1.57
30	mouth	1	2	circo	0	536	43	5	616	1.16	660	0.74	453	1.83	228	0.63	626	0.92	179	0.88	205	1
30	mouth	1	1	circostanza	0	763	70	11	273	1.7	228	1.49	412	1.73	479	1.23	331	2.09	485	1.31	642	0.61
30	hand	1	1	concetto	0	670	118	8	168	0.99	224	1.5	509	1.69	426	0.92	315	2.06	635	1.3	544	1.71
30	hand	1	3	conflitto	0	728	140	9	304	1.25	348	1.81	416	2.19	444	1.15	432	1.87	424	1.1	553	1.39
30	mouth	1	2	cravatta	0	644	38	8	694	0.24	688	0.44	552	1.87	250	0.93	675	0.58	105	0.22	200	1.2
30	hand	1	3	disperazione	0	696	101	12	311	1.55	428	1.74	505	1.61	389	1.35	501	1.86	459	1.43	427	1.96
30	hand	1	2	elefante	0	550	36	8	669	0.6	695	0.23	482	1.77	210	0.79	618	1.45	100	0	296	1.9
30	mouth	1	3	emergenza	0	568	161	9	315	1.64	348	1.9	500	1.6	400	1.21	474	1.88	456	1.37	509	1.42
30	hand	1	2	falce	0	744	5	5	662	0.82	632	1.3	387	1.85	365	1.04	575	1.7	129	0.56	288	1.32
30	hand	1	3	fallimento	0	719	99	10	344	1.59	263	1.74	455	1.8	420	1.28	400	1.94	450	1.69	520	1.85
30	hand	1	1	fascino	0	510	149	7	246	1.56	430	1.33	495	1.75	475	1.18	476	1.83	535	1.28	550	1.44
30	hand	1	2	flotta	0	580	35	6	600	1.2	644	0.75	442	1.71	330	0.95	582	1.66	163	0.72	375	1.9
30	mouth	1	3	fremito	0	1357	11	7	335	1.79	312	1.84	273	1.33	516	1.26	304	2.03	390	1.95	600	1.44
30	mouth	1	1	funzione	0	818	185	8	273	1.33	274	1.97	414	1.34	420	1.64	341	1.89	465	1.86	592	1.5
30	hand	1	2	gallo	0	520	12	5	700	0	695	0.23	486	1.74	215	0.75	600	1.39	112	0.54	212	1.48
30	mouth	1	2	giraffa	0	734	1	7	681	0.49	674	0.69	463	2.39	181	0.54	644	1.42	106	0.24	306	1.78
30	mouth	1	3	giuramento	0	648	13	10	309	1.5	344	1.91	393	1.44	400	1.12	417	1.76	400	1.9	553	1.21
30	hand	1	3	impulso	0	573	50	7	300	1.63	300	1.89	437	1.92	452	1.28	338	1.84	506	1	463	1.56
30	mouth	1	1	indiscrezione	0	1313	16	13	188	0.99	191	1.16	395	1.9	556	1.15	303	1.71	562	1.26	616	1.49
30	mouth	1	1	inefficienza	0	877	17	12	245	1.3	274	1.56	418	1.87	521	1.14	345	1.88	515	1.69	563	1.71
30	mouth	1	1	inesperienza	1		5	12	232	1.19	220	1.42	427	1.83	458	1.32	355	1.77	550	1.48	556	1.54
30	hand	1	1	insufficienza	0	1011	15	13	265	1.67	230	1.55	416	2.03	363	1.2	388	2.09	526	1.42	503	1.49
30	hand	1	3	ira	0	780	45	3	296	1.43	391	1.98	395	2.07	400	1.21	382	1.71	474	1.42	491	1.55
30	hand	1	1	logica	0	662	107	6	220	1.42	195	1.43	536	1.38	435	1.42	362	1.92	559	1.33	580	1.76
30	hand	1	1	merito	0	538	141	6	232	1.38	235	1.67	489	1.41	352	1.23	382	1.82	556	1.5	450	1.81
30	hand	1	2	minerale	0	518	9	8	627	0.88	538	1.46	447	1.71	396	1	505	2.09	174	1.08	388	1.26
30	hand	1	2	oca	0	589	29	3	685	0.54	700	0	468	2.21	150	0.52	659	1.08	106	0.24	197	1.33
30	hand	1	3	orrore	0	651	77	6	305	1.29	356	1.74	491	1.78	400	1.38	475	1.8	450	1.71	363	1.71
30	mouth	1	1	ozio	0	615	9	4	268	1.43	384	1.91	445	1.99	450	1.33	494	1.69	480	1.79	568	0.95
30	mouth	1	2	palude	0	763	12	6	645	0.77	613	1.13	332	1.93	341	0.95	578	1.65	175	0.9	310	2.05
30	mouth	1	3	pericolo	0	786	250	8	323	1.5	361	1.85	511	1.85	231	0.7	506	1.77	394	1.37	397	1.51
30	hand	1	1	reputazione	0	737	27	11	215	1.01	213	1.39	411	1.76	569	0.95	282	1.85	594	1.2	619	1
30	hand	1	3	stupore	0	599	62	7	339	1.61	440	1.68	515	1.37	366	1.18	422	1.83	496	1.55	500	1.69
30	mouth	1	2	telegrafo	0	792	3	9	614	1.46	556	1.44	321	1.75	438	1.28	455	2.35	153	1.24	531	1.25
30	mouth	1	1	tendenza	0	682	161	8	169	0.87	184	1.12	455	1.9	530	1.69	294	1.76	591	1.4	604	1.06
30	mouth	1	3	terrore	0	613	96	7	297	1.38	408	1.87	421	1.93	326	1.08	488	1.71	455	1.7	463	2.11
30	mouth	1	2	torre	0	827	44	5	656	0.63	674	0.45	423	2.02	245	0.89	579	1.63	129	0.76	228	1.59
30	mouth	1	3	tradimento	0	739	73	10	363	1.2	300	1.83	464	2.05	415	1.18	485	1.88	418	1.49	432	2.04
30	mouth	1	2	trattore	0	589	2	8	685	0.44	672	0.74	482	2.11	209	0.75	669	0.6	105	0.22	216	1.68
30	hand	1	1	unanimità	1		37	8	241	1.46	308	2.1	306	1.6	512	1.25	369	1.62	545	1.73	632	1.11
31	hand	1	3	abbandono	0	528	91	9	297	1.55	300	1.73	397	1.79	374	1.52	413	1.71	455	1.93	505	1.65
31	hand	1	1	affermazione	0	763	59	12	274	1.85	265	1.76	516	1.38	424	1.09	376	1.86	375	1.61	425	1.56
31	mouth	1	3	agitazione	0	649	25	10	413	1.5	311	1.56	541	1.75	320	1.44	497	1.82	441	1.54	364	2.04
31	mouth	1	3	agonia	0	878	29	6	294	1.39	332	1.6	305	1.42	480	1.51	444	1.99	476	1.69	600	1.32
31	mouth	1	2	alghe	0	555	24	5	669	0.62	657	0.73	422	1.93	269	0.6	641	1.48	121	0.54	225	1.34
31	hand	1	2	alveare	0	595	11	7	679	0.42	674	0.57	421	2.32	267	1.02	609	1.44	150	0.73	363	1.74
31	mouth	1	1	analogia	0	719	8	8	206	1.34	327	1.79	418	1.55	539	0.95	313	2.1	517	1.55	620	1.2
31	hand	1	2	canoa	0	605	25	5	679	0.59	688	0.33	440	2.13	335	1.18	600	1.14	114	0.36	288	1.57
31	mouth	1	2	circo	0	671	43	5	616	1.16	660	0.74	453	1.83	228	0.63	626	0.92	179	0.88	205	1
31	mouth	1	1	circostanza	0	592	70	11	273	1.7	228	1.49	412	1.73	479	1.23	331	2.09	485	1.31	642	0.61
31	hand	1	1	concetto	0	555	118	8	168	0.99	224	1.5	509	1.69	426	0.92	315	2.06	635	1.3	544	1.71
31	hand	1	3	conflitto	0	430	140	9	304	1.25	348	1.81	416	2.19	444	1.15	432	1.87	424	1.1	553	1.39
31	mouth	1	2	cravatta	0	653	38	8	694	0.24	688	0.44	552	1.87	250	0.93	675	0.58	105	0.22	200	1.2
31	hand	1	3	disperazione	0	651	101	12	311	1.55	428	1.74	505	1.61	389	1.35	501	1.86	459	1.43	427	1.96
31	hand	1	2	elefante	0	459	36	8	669	0.6	695	0.23	482	1.77	210	0.79	618	1.45	100	0	296	1.9
31	mouth	1	3	emergenza	0	529	161	9	315	1.64	348	1.9	500	1.6	400	1.21	474	1.88	456	1.37	509	1.42
31	hand	1	2	falce	0	552	5	5	662	0.82	632	1.3	387	1.85	365	1.04	575	1.7	129	0.56	288	1.32
31	hand	1	3	fallimento	0	534	99	10	344	1.59	263	1.74	455	1.8	420	1.28	400	1.94	450	1.69	520	1.85
31	hand	1	1	fascino	0	656	149	7	246	1.56	430	1.33	495	1.75	475	1.18	476	1.83	535	1.28	550	1.44
31	hand	1	2	flotta	0	500	35	6	600	1.2	644	0.75	442	1.71	330	0.95	582	1.66	163	0.72	375	1.9
31	mouth	1	3	fremito	0	965	11	7	335	1.79	312	1.84	273	1.33	516	1.26	304	2.03	390	1.95	600	1.44
31	mouth	1	1	funzione	0	517	185	8	273	1.33	274	1.97	414	1.34	420	1.64	341	1.89	465	1.86	592	1.5
31	hand	1	2	gallo	0	493	12	5	700	0	695	0.23	486	1.74	215	0.75	600	1.39	112	0.54	212	1.48
31	mouth	1	2	giraffa	0	584	1	7	681	0.49	674	0.69	463	2.39	181	0.54	644	1.42	106	0.24	306	1.78
31	mouth	1	3	giuramento	0	888	13	10	309	1.5	344	1.91	393	1.44	400	1.12	417	1.76	400	1.9	553	1.21
31	hand	1	3	impulso	0	454	50	7	300	1.63	300	1.89	437	1.92	452	1.28	338	1.84	506	1	463	1.56
31	mouth	1	1	indiscrezione	0	896	16	13	188	0.99	191	1.16	395	1.9	556	1.15	303	1.71	562	1.26	616	1.49
31	mouth	1	1	inefficienza	0	622	17	12	245	1.3	274	1.56	418	1.87	521	1.14	345	1.88	515	1.69	563	1.71
31	mouth	1	1	inesperienza	0	1097	5	12	232	1.19	220	1.42	427	1.83	458	1.32	355	1.77	550	1.48	556	1.54
31	hand	1	1	insufficienza	0	781	15	13	265	1.67	230	1.55	416	2.03	363	1.2	388	2.09	526	1.42	503	1.49
31	hand	1	3	ira	0	476	45	3	296	1.43	391	1.98	395	2.07	400	1.21	382	1.71	474	1.42	491	1.55
31	hand	1	1	logica	0	861	107	6	220	1.42	195	1.43	536	1.38	435	1.42	362	1.92	559	1.33	580	1.76
31	hand	1	1	merito	0	563	141	6	232	1.38	235	1.67	489	1.41	352	1.23	382	1.82	556	1.5	450	1.81
31	hand	1	2	minerale	0	496	9	8	627	0.88	538	1.46	447	1.71	396	1	505	2.09	174	1.08	388	1.26
31	hand	1	2	oca	0	496	29	3	685	0.54	700	0	468	2.21	150	0.52	659	1.08	106	0.24	197	1.33
31	hand	1	3	orrore	0	533	77	6	305	1.29	356	1.74	491	1.78	400	1.38	475	1.8	450	1.71	363	1.71
31	mouth	1	1	ozio	0	587	9	4	268	1.43	384	1.91	445	1.99	450	1.33	494	1.69	480	1.79	568	0.95
31	mouth	1	2	palude	0	651	12	6	645	0.77	613	1.13	332	1.93	341	0.95	578	1.65	175	0.9	310	2.05
31	mouth	1	3	pericolo	0	549	250	8	323	1.5	361	1.85	511	1.85	231	0.7	506	1.77	394	1.37	397	1.51
31	hand	1	1	reputazione	0	668	27	11	215	1.01	213	1.39	411	1.76	569	0.95	282	1.85	594	1.2	619	1
31	hand	1	3	stupore	0	461	62	7	339	1.61	440	1.68	515	1.37	366	1.18	422	1.83	496	1.55	500	1.69
31	mouth	1	2	telegrafo	0	645	3	9	614	1.46	556	1.44	321	1.75	438	1.28	455	2.35	153	1.24	531	1.25
31	mouth	1	1	tendenza	0	436	161	8	169	0.87	184	1.12	455	1.9	530	1.69	294	1.76	591	1.4	604	1.06
31	mouth	1	3	terrore	0	860	96	7	297	1.38	408	1.87	421	1.93	326	1.08	488	1.71	455	1.7	463	2.11
31	mouth	1	2	torre	0	863	44	5	656	0.63	674	0.45	423	2.02	245	0.89	579	1.63	129	0.76	228	1.59
31	mouth	1	3	tradimento	0	539	73	10	363	1.2	300	1.83	464	2.05	415	1.18	485	1.88	418	1.49	432	2.04
31	mouth	1	2	trattore	0	598	2	8	685	0.44	672	0.74	482	2.11	209	0.75	669	0.6	105	0.22	216	1.68
31	hand	1	1	unanimità	0	1147	37	8	241	1.46	308	2.1	306	1.6	512	1.25	369	1.62	545	1.73	632	1.11
32	hand	1	3	abbandono	0	848	91	9	297	1.55	300	1.73	397	1.79	374	1.52	413	1.71	455	1.93	505	1.65
32	hand	1	1	affermazione	0	1021	59	12	274	1.85	265	1.76	516	1.38	424	1.09	376	1.86	375	1.61	425	1.56
32	mouth	1	3	agitazione	0	694	25	10	413	1.5	311	1.56	541	1.75	320	1.44	497	1.82	441	1.54	364	2.04
32	mouth	1	3	agonia	0	725	29	6	294	1.39	332	1.6	305	1.42	480	1.51	444	1.99	476	1.69	600	1.32
32	mouth	1	2	alghe	0	743	24	5	669	0.62	657	0.73	422	1.93	269	0.6	641	1.48	121	0.54	225	1.34
32	hand	1	2	alveare	0	913	11	7	679	0.42	674	0.57	421	2.32	267	1.02	609	1.44	150	0.73	363	1.74
32	mouth	1	1	analogia	0	1060	8	8	206	1.34	327	1.79	418	1.55	539	0.95	313	2.1	517	1.55	620	1.2
32	hand	1	2	canoa	0	818	25	5	679	0.59	688	0.33	440	2.13	335	1.18	600	1.14	114	0.36	288	1.57
32	mouth	1	2	circo	0	662	43	5	616	1.16	660	0.74	453	1.83	228	0.63	626	0.92	179	0.88	205	1
32	mouth	1	1	circostanza	0	800	70	11	273	1.7	228	1.49	412	1.73	479	1.23	331	2.09	485	1.31	642	0.61
32	hand	1	1	concetto	0	850	118	8	168	0.99	224	1.5	509	1.69	426	0.92	315	2.06	635	1.3	544	1.71
32	hand	1	3	conflitto	0	655	140	9	304	1.25	348	1.81	416	2.19	444	1.15	432	1.87	424	1.1	553	1.39
32	mouth	1	2	cravatta	0	976	38	8	694	0.24	688	0.44	552	1.87	250	0.93	675	0.58	105	0.22	200	1.2
32	hand	1	3	disperazione	0	994	101	12	311	1.55	428	1.74	505	1.61	389	1.35	501	1.86	459	1.43	427	1.96
32	hand	1	2	elefante	0	604	36	8	669	0.6	695	0.23	482	1.77	210	0.79	618	1.45	100	0	296	1.9
32	mouth	1	3	emergenza	0	1096	161	9	315	1.64	348	1.9	500	1.6	400	1.21	474	1.88	456	1.37	509	1.42
32	hand	1	2	falce	0	695	5	5	662	0.82	632	1.3	387	1.85	365	1.04	575	1.7	129	0.56	288	1.32
32	hand	1	3	fallimento	0	739	99	10	344	1.59	263	1.74	455	1.8	420	1.28	400	1.94	450	1.69	520	1.85
32	hand	1	1	fascino	0	942	149	7	246	1.56	430	1.33	495	1.75	475	1.18	476	1.83	535	1.28	550	1.44
32	hand	1	2	flotta	0	589	35	6	600	1.2	644	0.75	442	1.71	330	0.95	582	1.66	163	0.72	375	1.9
32	mouth	1	3	fremito	0	806	11	7	335	1.79	312	1.84	273	1.33	516	1.26	304	2.03	390	1.95	600	1.44
32	mouth	1	1	funzione	0	946	185	8	273	1.33	274	1.97	414	1.34	420	1.64	341	1.89	465	1.86	592	1.5
32	hand	1	2	gallo	0	632	12	5	700	0	695	0.23	486	1.74	215	0.75	600	1.39	112	0.54	212	1.48
32	mouth	1	2	giraffa	0	870	1	7	681	0.49	674	0.69	463	2.39	181	0.54	644	1.42	106	0.24	306	1.78
32	mouth	1	3	giuramento	0	906	13	10	309	1.5	344	1.91	393	1.44	400	1.12	417	1.76	400	1.9	553	1.21
32	hand	1	3	impulso	0	888	50	7	300	1.63	300	1.89	437	1.92	452	1.28	338	1.84	506	1	463	1.56
32	mouth	1	1	indiscrezione	0	1069	16	13	188	0.99	191	1.16	395	1.9	556	1.15	303	1.71	562	1.26	616	1.49
32	mouth	1	1	inefficienza	0	955	17	12	245	1.3	274	1.56	418	1.87	521	1.14	345	1.88	515	1.69	563	1.71
32	mouth	1	1	inesperienza	0	1179	5	12	232	1.19	220	1.42	427	1.83	458	1.32	355	1.77	550	1.48	556	1.54
32	hand	1	1	insufficienza	0	771	15	13	265	1.67	230	1.55	416	2.03	363	1.2	388	2.09	526	1.42	503	1.49
32	hand	1	3	ira	0	630	45	3	296	1.43	391	1.98	395	2.07	400	1.21	382	1.71	474	1.42	491	1.55
32	hand	1	1	logica	0	629	107	6	220	1.42	195	1.43	536	1.38	435	1.42	362	1.92	559	1.33	580	1.76
32	hand	1	1	merito	0	652	141	6	232	1.38	235	1.67	489	1.41	352	1.23	382	1.82	556	1.5	450	1.81
32	hand	1	2	minerale	0	806	9	8	627	0.88	538	1.46	447	1.71	396	1	505	2.09	174	1.08	388	1.26
32	hand	1	2	oca	0	541	29	3	685	0.54	700	0	468	2.21	150	0.52	659	1.08	106	0.24	197	1.33
32	hand	1	3	orrore	0	695	77	6	305	1.29	356	1.74	491	1.78	400	1.38	475	1.8	450	1.71	363	1.71
32	mouth	1	1	ozio	0	779	9	4	268	1.43	384	1.91	445	1.99	450	1.33	494	1.69	480	1.79	568	0.95
32	mouth	1	2	palude	0	870	12	6	645	0.77	613	1.13	332	1.93	341	0.95	578	1.65	175	0.9	310	2.05
32	mouth	1	3	pericolo	0	884	250	8	323	1.5	361	1.85	511	1.85	231	0.7	506	1.77	394	1.37	397	1.51
32	hand	1	1	reputazione	0	576	27	11	215	1.01	213	1.39	411	1.76	569	0.95	282	1.85	594	1.2	619	1
32	hand	1	3	stupore	0	656	62	7	339	1.61	440	1.68	515	1.37	366	1.18	422	1.83	496	1.55	500	1.69
32	mouth	1	2	telegrafo	0	1021	3	9	614	1.46	556	1.44	321	1.75	438	1.28	455	2.35	153	1.24	531	1.25
32	mouth	1	1	tendenza	0	979	161	8	169	0.87	184	1.12	455	1.9	530	1.69	294	1.76	591	1.4	604	1.06
32	mouth	1	3	terrore	0	1012	96	7	297	1.38	408	1.87	421	1.93	326	1.08	488	1.71	455	1.7	463	2.11
32	mouth	1	2	torre	0	663	44	5	656	0.63	674	0.45	423	2.02	245	0.89	579	1.63	129	0.76	228	1.59
32	mouth	1	3	tradimento	0	787	73	10	363	1.2	300	1.83	464	2.05	415	1.18	485	1.88	418	1.49	432	2.04
32	mouth	1	2	trattore	0	876	2	8	685	0.44	672	0.74	482	2.11	209	0.75	669	0.6	105	0.22	216	1.68
32	hand	1	1	unanimità	0	1341	37	8	241	1.46	308	2.1	306	1.6	512	1.25	369	1.62	545	1.73	632	1.11
33	mouth	1	3	abbandono	0	551	91	9	297	1.55	300	1.73	397	1.79	374	1.52	413	1.71	455	1.93	505	1.65
33	mouth	1	1	affermazione	0	656	59	12	274	1.85	265	1.76	516	1.38	424	1.09	376	1.86	375	1.61	425	1.56
33	hand	1	3	agitazione	0	563	25	10	413	1.5	311	1.56	541	1.75	320	1.44	497	1.82	441	1.54	364	2.04
33	hand	1	3	agonia	0	681	29	6	294	1.39	332	1.6	305	1.42	480	1.51	444	1.99	476	1.69	600	1.32
33	hand	1	2	alghe	0	443	24	5	669	0.62	657	0.73	422	1.93	269	0.6	641	1.48	121	0.54	225	1.34
33	mouth	1	2	alveare	0	636	11	7	679	0.42	674	0.57	421	2.32	267	1.02	609	1.44	150	0.73	363	1.74
33	hand	1	1	analogia	0	650	8	8	206	1.34	327	1.79	418	1.55	539	0.95	313	2.1	517	1.55	620	1.2
33	mouth	1	2	canoa	0	842	25	5	679	0.59	688	0.33	440	2.13	335	1.18	600	1.14	114	0.36	288	1.57
33	hand	1	2	circo	0	550	43	5	616	1.16	660	0.74	453	1.83	228	0.63	626	0.92	179	0.88	205	1
33	hand	1	1	circostanza	0	550	70	11	273	1.7	228	1.49	412	1.73	479	1.23	331	2.09	485	1.31	642	0.61
33	mouth	1	1	concetto	0	494	118	8	168	0.99	224	1.5	509	1.69	426	0.92	315	2.06	635	1.3	544	1.71
33	mouth	1	3	conflitto	0	490	140	9	304	1.25	348	1.81	416	2.19	444	1.15	432	1.87	424	1.1	553	1.39
33	hand	1	2	cravatta	0	527	38	8	694	0.24	688	0.44	552	1.87	250	0.93	675	0.58	105	0.22	200	1.2
33	mouth	1	3	disperazione	0	633	101	12	311	1.55	428	1.74	505	1.61	389	1.35	501	1.86	459	1.43	427	1.96
33	mouth	1	2	elefante	0	509	36	8	669	0.6	695	0.23	482	1.77	210	0.79	618	1.45	100	0	296	1.9
33	hand	1	3	emergenza	0	642	161	9	315	1.64	348	1.9	500	1.6	400	1.21	474	1.88	456	1.37	509	1.42
33	mouth	1	2	falce	0	560	5	5	662	0.82	632	1.3	387	1.85	365	1.04	575	1.7	129	0.56	288	1.32
33	mouth	1	3	fallimento	0	558	99	10	344	1.59	263	1.74	455	1.8	420	1.28	400	1.94	450	1.69	520	1.85
33	mouth	1	1	fascino	0	555	149	7	246	1.56	430	1.33	495	1.75	475	1.18	476	1.83	535	1.28	550	1.44
33	mouth	1	2	flotta	0	511	35	6	600	1.2	644	0.75	442	1.71	330	0.95	582	1.66	163	0.72	375	1.9
33	hand	1	3	fremito	0	644	11	7	335	1.79	312	1.84	273	1.33	516	1.26	304	2.03	390	1.95	600	1.44
33	hand	1	1	funzione	0	532	185	8	273	1.33	274	1.97	414	1.34	420	1.64	341	1.89	465	1.86	592	1.5
33	mouth	1	2	gallo	0	578	12	5	700	0	695	0.23	486	1.74	215	0.75	600	1.39	112	0.54	212	1.48
33	hand	1	2	giraffa	0	557	1	7	681	0.49	674	0.69	463	2.39	181	0.54	644	1.42	106	0.24	306	1.78
33	hand	1	3	giuramento	0	661	13	10	309	1.5	344	1.91	393	1.44	400	1.12	417	1.76	400	1.9	553	1.21
33	mouth	1	3	impulso	0	590	50	7	300	1.63	300	1.89	437	1.92	452	1.28	338	1.84	506	1	463	1.56
33	hand	1	1	indiscrezione	0	671	16	13	188	0.99	191	1.16	395	1.9	556	1.15	303	1.71	562	1.26	616	1.49
33	hand	1	1	inefficienza	0	792	17	12	245	1.3	274	1.56	418	1.87	521	1.14	345	1.88	515	1.69	563	1.71
33	hand	1	1	inesperienza	0	579	5	12	232	1.19	220	1.42	427	1.83	458	1.32	355	1.77	550	1.48	556	1.54
33	mouth	1	1	insufficienza	0	620	15	13	265	1.67	230	1.55	416	2.03	363	1.2	388	2.09	526	1.42	503	1.49
33	mouth	1	3	ira	0	541	45	3	296	1.43	391	1.98	395	2.07	400	1.21	382	1.71	474	1.42	491	1.55
33	mouth	1	1	logica	0	550	107	6	220	1.42	195	1.43	536	1.38	435	1.42	362	1.92	559	1.33	580	1.76
33	mouth	1	1	merito	0	514	141	6	232	1.38	235	1.67	489	1.41	352	1.23	382	1.82	556	1.5	450	1.81
33	mouth	1	2	minerale	0	504	9	8	627	0.88	538	1.46	447	1.71	396	1	505	2.09	174	1.08	388	1.26
33	mouth	1	2	oca	0	468	29	3	685	0.54	700	0	468	2.21	150	0.52	659	1.08	106	0.24	197	1.33
33	mouth	1	3	orrore	0	755	77	6	305	1.29	356	1.74	491	1.78	400	1.38	475	1.8	450	1.71	363	1.71
33	hand	1	1	ozio	0	906	9	4	268	1.43	384	1.91	445	1.99	450	1.33	494	1.69	480	1.79	568	0.95
33	hand	1	2	palude	0	599	12	6	645	0.77	613	1.13	332	1.93	341	0.95	578	1.65	175	0.9	310	2.05
33	hand	1	3	pericolo	0	555	250	8	323	1.5	361	1.85	511	1.85	231	0.7	506	1.77	394	1.37	397	1.51
33	mouth	1	1	reputazione	0	705	27	11	215	1.01	213	1.39	411	1.76	569	0.95	282	1.85	594	1.2	619	1
33	mouth	1	3	stupore	0	636	62	7	339	1.61	440	1.68	515	1.37	366	1.18	422	1.83	496	1.55	500	1.69
33	hand	1	2	telegrafo	0	624	3	9	614	1.46	556	1.44	321	1.75	438	1.28	455	2.35	153	1.24	531	1.25
33	hand	1	1	tendenza	0	616	161	8	169	0.87	184	1.12	455	1.9	530	1.69	294	1.76	591	1.4	604	1.06
33	hand	1	3	terrore	0	623	96	7	297	1.38	408	1.87	421	1.93	326	1.08	488	1.71	455	1.7	463	2.11
33	hand	1	2	torre	0	521	44	5	656	0.63	674	0.45	423	2.02	245	0.89	579	1.63	129	0.76	228	1.59
33	hand	1	3	tradimento	0	574	73	10	363	1.2	300	1.83	464	2.05	415	1.18	485	1.88	418	1.49	432	2.04
33	hand	1	2	trattore	0	537	2	8	685	0.44	672	0.74	482	2.11	209	0.75	669	0.6	105	0.22	216	1.68
33	mouth	1	1	unanimità	0	917	37	8	241	1.46	308	2.1	306	1.6	512	1.25	369	1.62	545	1.73	632	1.11
34	mouth	1	3	abbandono	0	819	91	9	297	1.55	300	1.73	397	1.79	374	1.52	413	1.71	455	1.93	505	1.65
34	mouth	1	1	affermazione	0	707	59	12	274	1.85	265	1.76	516	1.38	424	1.09	376	1.86	375	1.61	425	1.56
34	hand	1	3	agitazione	0	568	25	10	413	1.5	311	1.56	541	1.75	320	1.44	497	1.82	441	1.54	364	2.04
34	hand	1	3	agonia	0	626	29	6	294	1.39	332	1.6	305	1.42	480	1.51	444	1.99	476	1.69	600	1.32
34	hand	1	2	alghe	0	538	24	5	669	0.62	657	0.73	422	1.93	269	0.6	641	1.48	121	0.54	225	1.34
34	mouth	1	2	alveare	0	1131	11	7	679	0.42	674	0.57	421	2.32	267	1.02	609	1.44	150	0.73	363	1.74
34	hand	1	1	analogia	0	539	8	8	206	1.34	327	1.79	418	1.55	539	0.95	313	2.1	517	1.55	620	1.2
34	mouth	1	2	canoa	0	734	25	5	679	0.59	688	0.33	440	2.13	335	1.18	600	1.14	114	0.36	288	1.57
34	hand	1	2	circo	0	603	43	5	616	1.16	660	0.74	453	1.83	228	0.63	626	0.92	179	0.88	205	1
34	hand	1	1	circostanza	0	698	70	11	273	1.7	228	1.49	412	1.73	479	1.23	331	2.09	485	1.31	642	0.61
34	mouth	1	1	concetto	0	601	118	8	168	0.99	224	1.5	509	1.69	426	0.92	315	2.06	635	1.3	544	1.71
34	mouth	1	3	conflitto	0	682	140	9	304	1.25	348	1.81	416	2.19	444	1.15	432	1.87	424	1.1	553	1.39
34	hand	1	2	cravatta	0	497	38	8	694	0.24	688	0.44	552	1.87	250	0.93	675	0.58	105	0.22	200	1.2
34	mouth	1	3	disperazione	0	708	101	12	311	1.55	428	1.74	505	1.61	389	1.35	501	1.86	459	1.43	427	1.96
34	mouth	1	2	elefante	0	1064	36	8	669	0.6	695	0.23	482	1.77	210	0.79	618	1.45	100	0	296	1.9
34	hand	1	3	emergenza	0	633	161	9	315	1.64	348	1.9	500	1.6	400	1.21	474	1.88	456	1.37	509	1.42
34	mouth	1	2	falce	0	542	5	5	662	0.82	632	1.3	387	1.85	365	1.04	575	1.7	129	0.56	288	1.32
34	mouth	1	3	fallimento	0	606	99	10	344	1.59	263	1.74	455	1.8	420	1.28	400	1.94	450	1.69	520	1.85
34	mouth	1	1	fascino	0	553	149	7	246	1.56	430	1.33	495	1.75	475	1.18	476	1.83	535	1.28	550	1.44
34	mouth	1	2	flotta	0	609	35	6	600	1.2	644	0.75	442	1.71	330	0.95	582	1.66	163	0.72	375	1.9
34	hand	1	3	fremito	0	719	11	7	335	1.79	312	1.84	273	1.33	516	1.26	304	2.03	390	1.95	600	1.44
34	hand	1	1	funzione	0	505	185	8	273	1.33	274	1.97	414	1.34	420	1.64	341	1.89	465	1.86	592	1.5
34	mouth	1	2	gallo	0	787	12	5	700	0	695	0.23	486	1.74	215	0.75	600	1.39	112	0.54	212	1.48
34	hand	1	2	giraffa	0	451	1	7	681	0.49	674	0.69	463	2.39	181	0.54	644	1.42	106	0.24	306	1.78
34	hand	1	3	giuramento	0	561	13	10	309	1.5	344	1.91	393	1.44	400	1.12	417	1.76	400	1.9	553	1.21
34	mouth	1	3	impulso	0	561	50	7	300	1.63	300	1.89	437	1.92	452	1.28	338	1.84	506	1	463	1.56
34	hand	1	1	indiscrezione	0	929	16	13	188	0.99	191	1.16	395	1.9	556	1.15	303	1.71	562	1.26	616	1.49
34	hand	1	1	inefficienza	0	822	17	12	245	1.3	274	1.56	418	1.87	521	1.14	345	1.88	515	1.69	563	1.71
34	hand	1	1	inesperienza	0	986	5	12	232	1.19	220	1.42	427	1.83	458	1.32	355	1.77	550	1.48	556	1.54
34	mouth	1	1	insufficienza	0	925	15	13	265	1.67	230	1.55	416	2.03	363	1.2	388	2.09	526	1.42	503	1.49
34	mouth	1	3	ira	0	730	45	3	296	1.43	391	1.98	395	2.07	400	1.21	382	1.71	474	1.42	491	1.55
34	mouth	1	1	logica	0	558	107	6	220	1.42	195	1.43	536	1.38	435	1.42	362	1.92	559	1.33	580	1.76
34	mouth	1	1	merito	0	898	141	6	232	1.38	235	1.67	489	1.41	352	1.23	382	1.82	556	1.5	450	1.81
34	mouth	1	2	minerale	0	958	9	8	627	0.88	538	1.46	447	1.71	396	1	505	2.09	174	1.08	388	1.26
34	mouth	1	2	oca	0	562	29	3	685	0.54	700	0	468	2.21	150	0.52	659	1.08	106	0.24	197	1.33
34	mouth	1	3	orrore	0	583	77	6	305	1.29	356	1.74	491	1.78	400	1.38	475	1.8	450	1.71	363	1.71
34	hand	1	1	ozio	0	548	9	4	268	1.43	384	1.91	445	1.99	450	1.33	494	1.69	480	1.79	568	0.95
34	hand	1	2	palude	0	710	12	6	645	0.77	613	1.13	332	1.93	341	0.95	578	1.65	175	0.9	310	2.05
34	hand	1	3	pericolo	0	500	250	8	323	1.5	361	1.85	511	1.85	231	0.7	506	1.77	394	1.37	397	1.51
34	mouth	1	1	reputazione	0	656	27	11	215	1.01	213	1.39	411	1.76	569	0.95	282	1.85	594	1.2	619	1
34	mouth	1	3	stupore	0	614	62	7	339	1.61	440	1.68	515	1.37	366	1.18	422	1.83	496	1.55	500	1.69
34	hand	1	2	telegrafo	0	614	3	9	614	1.46	556	1.44	321	1.75	438	1.28	455	2.35	153	1.24	531	1.25
34	hand	1	1	tendenza	0	563	161	8	169	0.87	184	1.12	455	1.9	530	1.69	294	1.76	591	1.4	604	1.06
34	hand	1	3	terrore	0	548	96	7	297	1.38	408	1.87	421	1.93	326	1.08	488	1.71	455	1.7	463	2.11
34	hand	1	2	torre	0	479	44	5	656	0.63	674	0.45	423	2.02	245	0.89	579	1.63	129	0.76	228	1.59
34	hand	1	3	tradimento	0	505	73	10	363	1.2	300	1.83	464	2.05	415	1.18	485	1.88	418	1.49	432	2.04
34	hand	1	2	trattore	0	597	2	8	685	0.44	672	0.74	482	2.11	209	0.75	669	0.6	105	0.22	216	1.68
34	mouth	1	1	unanimità	0	1005	37	8	241	1.46	308	2.1	306	1.6	512	1.25	369	1.62	545	1.73	632	1.11
35	hand	1	3	abbandono	0	678	91	9	297	1.55	300	1.73	397	1.79	374	1.52	413	1.71	455	1.93	505	1.65
35	hand	1	1	affermazione	0	580	59	12	274	1.85	265	1.76	516	1.38	424	1.09	376	1.86	375	1.61	425	1.56
35	mouth	1	3	agitazione	0	765	25	10	413	1.5	311	1.56	541	1.75	320	1.44	497	1.82	441	1.54	364	2.04
35	mouth	1	3	agonia	0	526	29	6	294	1.39	332	1.6	305	1.42	480	1.51	444	1.99	476	1.69	600	1.32
35	mouth	1	2	alghe	0	641	24	5	669	0.62	657	0.73	422	1.93	269	0.6	641	1.48	121	0.54	225	1.34
35	hand	1	2	alveare	0	794	11	7	679	0.42	674	0.57	421	2.32	267	1.02	609	1.44	150	0.73	363	1.74
35	mouth	1	1	analogia	0	698	8	8	206	1.34	327	1.79	418	1.55	539	0.95	313	2.1	517	1.55	620	1.2
35	hand	1	2	canoa	0	728	25	5	679	0.59	688	0.33	440	2.13	335	1.18	600	1.14	114	0.36	288	1.57
35	mouth	1	2	circo	0	659	43	5	616	1.16	660	0.74	453	1.83	228	0.63	626	0.92	179	0.88	205	1
35	mouth	1	1	circostanza	0	639	70	11	273	1.7	228	1.49	412	1.73	479	1.23	331	2.09	485	1.31	642	0.61
35	hand	1	1	concetto	0	531	118	8	168	0.99	224	1.5	509	1.69	426	0.92	315	2.06	635	1.3	544	1.71
35	hand	1	3	conflitto	0	636	140	9	304	1.25	348	1.81	416	2.19	444	1.15	432	1.87	424	1.1	553	1.39
35	mouth	1	2	cravatta	0	649	38	8	694	0.24	688	0.44	552	1.87	250	0.93	675	0.58	105	0.22	200	1.2
35	hand	1	3	disperazione	0	813	101	12	311	1.55	428	1.74	505	1.61	389	1.35	501	1.86	459	1.43	427	1.96
35	hand	1	2	elefante	0	531	36	8	669	0.6	695	0.23	482	1.77	210	0.79	618	1.45	100	0	296	1.9
35	mouth	1	3	emergenza	0	667	161	9	315	1.64	348	1.9	500	1.6	400	1.21	474	1.88	456	1.37	509	1.42
35	hand	1	2	falce	0	488	5	5	662	0.82	632	1.3	387	1.85	365	1.04	575	1.7	129	0.56	288	1.32
35	hand	1	3	fallimento	0	468	99	10	344	1.59	263	1.74	455	1.8	420	1.28	400	1.94	450	1.69	520	1.85
35	hand	1	1	fascino	0	609	149	7	246	1.56	430	1.33	495	1.75	475	1.18	476	1.83	535	1.28	550	1.44
35	hand	1	2	flotta	0	694	35	6	600	1.2	644	0.75	442	1.71	330	0.95	582	1.66	163	0.72	375	1.9
35	mouth	1	3	fremito	0	825	11	7	335	1.79	312	1.84	273	1.33	516	1.26	304	2.03	390	1.95	600	1.44
35	mouth	1	1	funzione	0	650	185	8	273	1.33	274	1.97	414	1.34	420	1.64	341	1.89	465	1.86	592	1.5
35	hand	1	2	gallo	0	516	12	5	700	0	695	0.23	486	1.74	215	0.75	600	1.39	112	0.54	212	1.48
35	mouth	1	2	giraffa	0	772	1	7	681	0.49	674	0.69	463	2.39	181	0.54	644	1.42	106	0.24	306	1.78
35	mouth	1	3	giuramento	0	704	13	10	309	1.5	344	1.91	393	1.44	400	1.12	417	1.76	400	1.9	553	1.21
35	hand	1	3	impulso	0	557	50	7	300	1.63	300	1.89	437	1.92	452	1.28	338	1.84	506	1	463	1.56
35	mouth	1	1	indiscrezione	0	908	16	13	188	0.99	191	1.16	395	1.9	556	1.15	303	1.71	562	1.26	616	1.49
35	mouth	1	1	inefficienza	0	980	17	12	245	1.3	274	1.56	418	1.87	521	1.14	345	1.88	515	1.69	563	1.71
35	mouth	1	1	inesperienza	0	1279	5	12	232	1.19	220	1.42	427	1.83	458	1.32	355	1.77	550	1.48	556	1.54
35	hand	1	1	insufficienza	0	927	15	13	265	1.67	230	1.55	416	2.03	363	1.2	388	2.09	526	1.42	503	1.49
35	hand	1	3	ira	0	614	45	3	296	1.43	391	1.98	395	2.07	400	1.21	382	1.71	474	1.42	491	1.55
35	hand	1	1	logica	0	742	107	6	220	1.42	195	1.43	536	1.38	435	1.42	362	1.92	559	1.33	580	1.76
35	hand	1	1	merito	0	592	141	6	232	1.38	235	1.67	489	1.41	352	1.23	382	1.82	556	1.5	450	1.81
35	hand	1	2	minerale	0	1002	9	8	627	0.88	538	1.46	447	1.71	396	1	505	2.09	174	1.08	388	1.26
35	hand	1	2	oca	0	503	29	3	685	0.54	700	0	468	2.21	150	0.52	659	1.08	106	0.24	197	1.33
35	hand	1	3	orrore	0	658	77	6	305	1.29	356	1.74	491	1.78	400	1.38	475	1.8	450	1.71	363	1.71
35	mouth	1	1	ozio	0	570	9	4	268	1.43	384	1.91	445	1.99	450	1.33	494	1.69	480	1.79	568	0.95
35	mouth	1	2	palude	0	665	12	6	645	0.77	613	1.13	332	1.93	341	0.95	578	1.65	175	0.9	310	2.05
35	mouth	1	3	pericolo	0	467	250	8	323	1.5	361	1.85	511	1.85	231	0.7	506	1.77	394	1.37	397	1.51
35	hand	1	1	reputazione	0	665	27	11	215	1.01	213	1.39	411	1.76	569	0.95	282	1.85	594	1.2	619	1
35	hand	1	3	stupore	0	506	62	7	339	1.61	440	1.68	515	1.37	366	1.18	422	1.83	496	1.55	500	1.69
35	mouth	1	2	telegrafo	0	715	3	9	614	1.46	556	1.44	321	1.75	438	1.28	455	2.35	153	1.24	531	1.25
35	mouth	1	1	tendenza	0	681	161	8	169	0.87	184	1.12	455	1.9	530	1.69	294	1.76	591	1.4	604	1.06
35	mouth	1	3	terrore	0	551	96	7	297	1.38	408	1.87	421	1.93	326	1.08	488	1.71	455	1.7	463	2.11
35	mouth	1	2	torre	0	763	44	5	656	0.63	674	0.45	423	2.02	245	0.89	579	1.63	129	0.76	228	1.59
35	mouth	1	3	tradimento	0	595	73	10	363	1.2	300	1.83	464	2.05	415	1.18	485	1.88	418	1.49	432	2.04
35	mouth	1	2	trattore	0	506	2	8	685	0.44	672	0.74	482	2.11	209	0.75	669	0.6	105	0.22	216	1.68
35	hand	1	1	unanimità	0	1232	37	8	241	1.46	308	2.1	306	1.6	512	1.25	369	1.62	545	1.73	632	1.11
36	hand	1	3	abbandono	0	902	91	9	297	1.55	300	1.73	397	1.79	374	1.52	413	1.71	455	1.93	505	1.65
36	hand	1	1	affermazione	0	1143	59	12	274	1.85	265	1.76	516	1.38	424	1.09	376	1.86	375	1.61	425	1.56
36	mouth	1	3	agitazione	0	624	25	10	413	1.5	311	1.56	541	1.75	320	1.44	497	1.82	441	1.54	364	2.04
36	mouth	1	3	agonia	0	741	29	6	294	1.39	332	1.6	305	1.42	480	1.51	444	1.99	476	1.69	600	1.32
36	mouth	1	2	alghe	0	703	24	5	669	0.62	657	0.73	422	1.93	269	0.6	641	1.48	121	0.54	225	1.34
36	hand	1	2	alveare	0	848	11	7	679	0.42	674	0.57	421	2.32	267	1.02	609	1.44	150	0.73	363	1.74
36	mouth	1	1	analogia	0	1068	8	8	206	1.34	327	1.79	418	1.55	539	0.95	313	2.1	517	1.55	620	1.2
36	hand	1	2	canoa	0	1031	25	5	679	0.59	688	0.33	440	2.13	335	1.18	600	1.14	114	0.36	288	1.57
36	mouth	1	2	circo	0	686	43	5	616	1.16	660	0.74	453	1.83	228	0.63	626	0.92	179	0.88	205	1
36	mouth	1	1	circostanza	0	842	70	11	273	1.7	228	1.49	412	1.73	479	1.23	331	2.09	485	1.31	642	0.61
36	hand	1	1	concetto	0	636	118	8	168	0.99	224	1.5	509	1.69	426	0.92	315	2.06	635	1.3	544	1.71
36	hand	1	3	conflitto	0	810	140	9	304	1.25	348	1.81	416	2.19	444	1.15	432	1.87	424	1.1	553	1.39
36	mouth	1	2	cravatta	0	867	38	8	694	0.24	688	0.44	552	1.87	250	0.93	675	0.58	105	0.22	200	1.2
36	hand	1	3	disperazione	0	957	101	12	311	1.55	428	1.74	505	1.61	389	1.35	501	1.86	459	1.43	427	1.96
36	hand	1	2	elefante	0	744	36	8	669	0.6	695	0.23	482	1.77	210	0.79	618	1.45	100	0	296	1.9
36	mouth	1	3	emergenza	0	807	161	9	315	1.64	348	1.9	500	1.6	400	1.21	474	1.88	456	1.37	509	1.42
36	hand	1	2	falce	0	1017	5	5	662	0.82	632	1.3	387	1.85	365	1.04	575	1.7	129	0.56	288	1.32
36	hand	1	3	fallimento	0	684	99	10	344	1.59	263	1.74	455	1.8	420	1.28	400	1.94	450	1.69	520	1.85
36	hand	1	1	fascino	0	995	149	7	246	1.56	430	1.33	495	1.75	475	1.18	476	1.83	535	1.28	550	1.44
36	hand	1	2	flotta	0	604	35	6	600	1.2	644	0.75	442	1.71	330	0.95	582	1.66	163	0.72	375	1.9
36	mouth	1	3	fremito	1		11	7	335	1.79	312	1.84	273	1.33	516	1.26	304	2.03	390	1.95	600	1.44
36	mouth	1	1	funzione	0	1061	185	8	273	1.33	274	1.97	414	1.34	420	1.64	341	1.89	465	1.86	592	1.5
36	hand	1	2	gallo	0	679	12	5	700	0	695	0.23	486	1.74	215	0.75	600	1.39	112	0.54	212	1.48
36	mouth	1	2	giraffa	0	719	1	7	681	0.49	674	0.69	463	2.39	181	0.54	644	1.42	106	0.24	306	1.78
36	mouth	1	3	giuramento	0	763	13	10	309	1.5	344	1.91	393	1.44	400	1.12	417	1.76	400	1.9	553	1.21
36	hand	1	3	impulso	0	578	50	7	300	1.63	300	1.89	437	1.92	452	1.28	338	1.84	506	1	463	1.56
36	mouth	1	1	indiscrezione	0	991	16	13	188	0.99	191	1.16	395	1.9	556	1.15	303	1.71	562	1.26	616	1.49
36	mouth	1	1	inefficienza	0	1186	17	12	245	1.3	274	1.56	418	1.87	521	1.14	345	1.88	515	1.69	563	1.71
36	mouth	1	1	inesperienza	0	944	5	12	232	1.19	220	1.42	427	1.83	458	1.32	355	1.77	550	1.48	556	1.54
36	hand	1	1	insufficienza	0	786	15	13	265	1.67	230	1.55	416	2.03	363	1.2	388	2.09	526	1.42	503	1.49
36	hand	1	3	ira	0	615	45	3	296	1.43	391	1.98	395	2.07	400	1.21	382	1.71	474	1.42	491	1.55
36	hand	1	1	logica	0	549	107	6	220	1.42	195	1.43	536	1.38	435	1.42	362	1.92	559	1.33	580	1.76
36	hand	1	1	merito	0	775	141	6	232	1.38	235	1.67	489	1.41	352	1.23	382	1.82	556	1.5	450	1.81
36	hand	1	2	minerale	0	990	9	8	627	0.88	538	1.46	447	1.71	396	1	505	2.09	174	1.08	388	1.26
36	hand	1	2	oca	0	558	29	3	685	0.54	700	0	468	2.21	150	0.52	659	1.08	106	0.24	197	1.33
36	hand	1	3	orrore	0	793	77	6	305	1.29	356	1.74	491	1.78	400	1.38	475	1.8	450	1.71	363	1.71
36	mouth	1	1	ozio	0	1189	9	4	268	1.43	384	1.91	445	1.99	450	1.33	494	1.69	480	1.79	568	0.95
36	mouth	1	2	palude	0	826	12	6	645	0.77	613	1.13	332	1.93	341	0.95	578	1.65	175	0.9	310	2.05
36	mouth	1	3	pericolo	0	731	250	8	323	1.5	361	1.85	511	1.85	231	0.7	506	1.77	394	1.37	397	1.51
36	hand	1	1	reputazione	0	778	27	11	215	1.01	213	1.39	411	1.76	569	0.95	282	1.85	594	1.2	619	1
36	hand	1	3	stupore	0	659	62	7	339	1.61	440	1.68	515	1.37	366	1.18	422	1.83	496	1.55	500	1.69
36	mouth	1	2	telegrafo	0	1120	3	9	614	1.46	556	1.44	321	1.75	438	1.28	455	2.35	153	1.24	531	1.25
36	mouth	1	1	tendenza	0	903	161	8	169	0.87	184	1.12	455	1.9	530	1.69	294	1.76	591	1.4	604	1.06
36	mouth	1	3	terrore	0	543	96	7	297	1.38	408	1.87	421	1.93	326	1.08	488	1.71	455	1.7	463	2.11
36	mouth	1	2	torre	0	669	44	5	656	0.63	674	0.45	423	2.02	245	0.89	579	1.63	129	0.76	228	1.59
36	mouth	1	3	tradimento	0	935	73	10	363	1.2	300	1.83	464	2.05	415	1.18	485	1.88	418	1.49	432	2.04
36	mouth	1	2	trattore	0	794	2	8	685	0.44	672	0.74	482	2.11	209	0.75	669	0.6	105	0.22	216	1.68
36	hand	1	1	unanimità	0	1497	37	8	241	1.46	308	2.1	306	1.6	512	1.25	369	1.62	545	1.73	632	1.11
37	mouth	1	3	abbandono	0	448	91	9	297	1.55	300	1.73	397	1.79	374	1.52	413	1.71	455	1.93	505	1.65
37	mouth	1	1	affermazione	0	872	59	12	274	1.85	265	1.76	516	1.38	424	1.09	376	1.86	375	1.61	425	1.56
37	hand	1	3	agitazione	0	483	25	10	413	1.5	311	1.56	541	1.75	320	1.44	497	1.82	441	1.54	364	2.04
37	hand	1	3	agonia	0	976	29	6	294	1.39	332	1.6	305	1.42	480	1.51	444	1.99	476	1.69	600	1.32
37	hand	1	2	alghe	0	473	24	5	669	0.62	657	0.73	422	1.93	269	0.6	641	1.48	121	0.54	225	1.34
37	mouth	1	2	alveare	1		11	7	679	0.42	674	0.57	421	2.32	267	1.02	609	1.44	150	0.73	363	1.74
37	hand	1	1	analogia	0	930	8	8	206	1.34	327	1.79	418	1.55	539	0.95	313	2.1	517	1.55	620	1.2
37	mouth	1	2	canoa	0	745	25	5	679	0.59	688	0.33	440	2.13	335	1.18	600	1.14	114	0.36	288	1.57
37	hand	1	2	circo	0	543	43	5	616	1.16	660	0.74	453	1.83	228	0.63	626	0.92	179	0.88	205	1
37	hand	1	1	circostanza	0	424	70	11	273	1.7	228	1.49	412	1.73	479	1.23	331	2.09	485	1.31	642	0.61
37	mouth	1	1	concetto	0	471	118	8	168	0.99	224	1.5	509	1.69	426	0.92	315	2.06	635	1.3	544	1.71
37	mouth	1	3	conflitto	0	517	140	9	304	1.25	348	1.81	416	2.19	444	1.15	432	1.87	424	1.1	553	1.39
37	hand	1	2	cravatta	0	424	38	8	694	0.24	688	0.44	552	1.87	250	0.93	675	0.58	105	0.22	200	1.2
37	mouth	1	3	disperazione	0	1213	101	12	311	1.55	428	1.74	505	1.61	389	1.35	501	1.86	459	1.43	427	1.96
37	mouth	1	2	elefante	0	572	36	8	669	0.6	695	0.23	482	1.77	210	0.79	618	1.45	100	0	296	1.9
37	hand	1	3	emergenza	0	608	161	9	315	1.64	348	1.9	500	1.6	400	1.21	474	1.88	456	1.37	509	1.42
37	mouth	1	2	falce	0	829	5	5	662	0.82	632	1.3	387	1.85	365	1.04	575	1.7	129	0.56	288	1.32
37	mouth	1	3	fallimento	0	547	99	10	344	1.59	263	1.74	455	1.8	420	1.28	400	1.94	450	1.69	520	1.85
37	mouth	1	1	fascino	0	526	149	7	246	1.56	430	1.33	495	1.75	475	1.18	476	1.83	535	1.28	550	1.44
37	mouth	1	2	flotta	0	553	35	6	600	1.2	644	0.75	442	1.71	330	0.95	582	1.66	163	0.72	375	1.9
37	hand	1	3	fremito	0	944	11	7	335	1.79	312	1.84	273	1.33	516	1.26	304	2.03	390	1.95	600	1.44
37	hand	1	1	funzione	0	534	185	8	273	1.33	274	1.97	414	1.34	420	1.64	341	1.89	465	1.86	592	1.5
37	mouth	1	2	gallo	0	567	12	5	700	0	695	0.23	486	1.74	215	0.75	600	1.39	112	0.54	212	1.48
37	hand	1	2	giraffa	0	600	1	7	681	0.49	674	0.69	463	2.39	181	0.54	644	1.42	106	0.24	306	1.78
37	hand	1	3	giuramento	0	577	13	10	309	1.5	344	1.91	393	1.44	400	1.12	417	1.76	400	1.9	553	1.21
37	mouth	1	3	impulso	0	506	50	7	300	1.63	300	1.89	437	1.92	452	1.28	338	1.84	506	1	463	1.56
37	hand	1	1	indiscrezione	0	481	16	13	188	0.99	191	1.16	395	1.9	556	1.15	303	1.71	562	1.26	616	1.49
37	hand	1	1	inefficienza	0	673	17	12	245	1.3	274	1.56	418	1.87	521	1.14	345	1.88	515	1.69	563	1.71
37	hand	1	1	inesperienza	0	1081	5	12	232	1.19	220	1.42	427	1.83	458	1.32	355	1.77	550	1.48	556	1.54
37	mouth	1	1	insufficienza	0	685	15	13	265	1.67	230	1.55	416	2.03	363	1.2	388	2.09	526	1.42	503	1.49
37	mouth	1	3	ira	0	662	45	3	296	1.43	391	1.98	395	2.07	400	1.21	382	1.71	474	1.42	491	1.55
37	mouth	1	1	logica	0	531	107	6	220	1.42	195	1.43	536	1.38	435	1.42	362	1.92	559	1.33	580	1.76
37	mouth	1	1	merito	0	691	141	6	232	1.38	235	1.67	489	1.41	352	1.23	382	1.82	556	1.5	450	1.81
37	mouth	1	2	minerale	0	625	9	8	627	0.88	538	1.46	447	1.71	396	1	505	2.09	174	1.08	388	1.26
37	mouth	1	2	oca	0	568	29	3	685	0.54	700	0	468	2.21	150	0.52	659	1.08	106	0.24	197	1.33
37	mouth	1	3	orrore	0	802	77	6	305	1.29	356	1.74	491	1.78	400	1.38	475	1.8	450	1.71	363	1.71
37	hand	1	1	ozio	0	580	9	4	268	1.43	384	1.91	445	1.99	450	1.33	494	1.69	480	1.79	568	0.95
37	hand	1	2	palude	0	659	12	6	645	0.77	613	1.13	332	1.93	341	0.95	578	1.65	175	0.9	310	2.05
37	hand	1	3	pericolo	0	490	250	8	323	1.5	361	1.85	511	1.85	231	0.7	506	1.77	394	1.37	397	1.51
37	mouth	1	1	reputazione	0	631	27	11	215	1.01	213	1.39	411	1.76	569	0.95	282	1.85	594	1.2	619	1
37	mouth	1	3	stupore	0	551	62	7	339	1.61	440	1.68	515	1.37	366	1.18	422	1.83	496	1.55	500	1.69
37	hand	1	2	telegrafo	0	547	3	9	614	1.46	556	1.44	321	1.75	438	1.28	455	2.35	153	1.24	531	1.25
37	hand	1	1	tendenza	0	495	161	8	169	0.87	184	1.12	455	1.9	530	1.69	294	1.76	591	1.4	604	1.06
37	hand	1	3	terrore	0	511	96	7	297	1.38	408	1.87	421	1.93	326	1.08	488	1.71	455	1.7	463	2.11
37	hand	1	2	torre	0	503	44	5	656	0.63	674	0.45	423	2.02	245	0.89	579	1.63	129	0.76	228	1.59
37	hand	1	3	tradimento	0	550	73	10	363	1.2	300	1.83	464	2.05	415	1.18	485	1.88	418	1.49	432	2.04
37	hand	1	2	trattore	0	665	2	8	685	0.44	672	0.74	482	2.11	209	0.75	669	0.6	105	0.22	216	1.68
37	mouth	1	1	unanimità	1		37	8	241	1.46	308	2.1	306	1.6	512	1.25	369	1.62	545	1.73	632	1.11
38	mouth	1	3	abbandono	0	634	91	9	297	1.55	300	1.73	397	1.79	374	1.52	413	1.71	455	1.93	505	1.65
38	mouth	1	1	affermazione	0	661	59	12	274	1.85	265	1.76	516	1.38	424	1.09	376	1.86	375	1.61	425	1.56
38	hand	1	3	agitazione	0	798	25	10	413	1.5	311	1.56	541	1.75	320	1.44	497	1.82	441	1.54	364	2.04
38	hand	1	3	agonia	0	401	29	6	294	1.39	332	1.6	305	1.42	480	1.51	444	1.99	476	1.69	600	1.32
38	hand	1	2	alghe	0	488	24	5	669	0.62	657	0.73	422	1.93	269	0.6	641	1.48	121	0.54	225	1.34
38	mouth	1	2	alveare	0	559	11	7	679	0.42	674	0.57	421	2.32	267	1.02	609	1.44	150	0.73	363	1.74
38	hand	1	1	analogia	0	549	8	8	206	1.34	327	1.79	418	1.55	539	0.95	313	2.1	517	1.55	620	1.2
38	mouth	1	2	canoa	0	423	25	5	679	0.59	688	0.33	440	2.13	335	1.18	600	1.14	114	0.36	288	1.57
38	hand	1	2	circo	0	507	43	5	616	1.16	660	0.74	453	1.83	228	0.63	626	0.92	179	0.88	205	1
38	hand	1	1	circostanza	0	661	70	11	273	1.7	228	1.49	412	1.73	479	1.23	331	2.09	485	1.31	642	0.61
38	mouth	1	1	concetto	0	583	118	8	168	0.99	224	1.5	509	1.69	426	0.92	315	2.06	635	1.3	544	1.71
38	mouth	1	3	conflitto	0	597	140	9	304	1.25	348	1.81	416	2.19	444	1.15	432	1.87	424	1.1	553	1.39
38	hand	1	2	cravatta	0	631	38	8	694	0.24	688	0.44	552	1.87	250	0.93	675	0.58	105	0.22	200	1.2
38	mouth	1	3	disperazione	0	549	101	12	311	1.55	428	1.74	505	1.61	389	1.35	501	1.86	459	1.43	427	1.96
38	mouth	1	2	elefante	0	798	36	8	669	0.6	695	0.23	482	1.77	210	0.79	618	1.45	100	0	296	1.9
38	hand	1	3	emergenza	0	533	161	9	315	1.64	348	1.9	500	1.6	400	1.21	474	1.88	456	1.37	509	1.42
38	mouth	1	2	falce	0	773	5	5	662	0.82	632	1.3	387	1.85	365	1.04	575	1.7	129	0.56	288	1.32
38	mouth	1	3	fallimento	0	572	99	10	344	1.59	263	1.74	455	1.8	420	1.28	400	1.94	450	1.69	520	1.85
38	mouth	1	1	fascino	0	591	149	7	246	1.56	430	1.33	495	1.75	475	1.18	476	1.83	535	1.28	550	1.44
38	mouth	1	2	flotta	0	578	35	6	600	1.2	644	0.75	442	1.71	330	0.95	582	1.66	163	0.72	375	1.9
38	hand	1	3	fremito	0	663	11	7	335	1.79	312	1.84	273	1.33	516	1.26	304	2.03	390	1.95	600	1.44
38	hand	1	1	funzione	0	519	185	8	273	1.33	274	1.97	414	1.34	420	1.64	341	1.89	465	1.86	592	1.5
38	mouth	1	2	gallo	0	967	12	5	700	0	695	0.23	486	1.74	215	0.75	600	1.39	112	0.54	212	1.48
38	hand	1	2	giraffa	0	472	1	7	681	0.49	674	0.69	463	2.39	181	0.54	644	1.42	106	0.24	306	1.78
38	hand	1	3	giuramento	0	848	13	10	309	1.5	344	1.91	393	1.44	400	1.12	417	1.76	400	1.9	553	1.21
38	mouth	1	3	impulso	0	537	50	7	300	1.63	300	1.89	437	1.92	452	1.28	338	1.84	506	1	463	1.56
38	hand	1	1	indiscrezione	0	518	16	13	188	0.99	191	1.16	395	1.9	556	1.15	303	1.71	562	1.26	616	1.49
38	hand	1	1	inefficienza	0	577	17	12	245	1.3	274	1.56	418	1.87	521	1.14	345	1.88	515	1.69	563	1.71
38	hand	1	1	inesperienza	0	590	5	12	232	1.19	220	1.42	427	1.83	458	1.32	355	1.77	550	1.48	556	1.54
38	mouth	1	1	insufficienza	0	733	15	13	265	1.67	230	1.55	416	2.03	363	1.2	388	2.09	526	1.42	503	1.49
38	mouth	1	3	ira	0	516	45	3	296	1.43	391	1.98	395	2.07	400	1.21	382	1.71	474	1.42	491	1.55
38	mouth	1	1	logica	0	535	107	6	220	1.42	195	1.43	536	1.38	435	1.42	362	1.92	559	1.33	580	1.76
38	mouth	1	1	merito	0	604	141	6	232	1.38	235	1.67	489	1.41	352	1.23	382	1.82	556	1.5	450	1.81
38	mouth	1	2	minerale	0	581	9	8	627	0.88	538	1.46	447	1.71	396	1	505	2.09	174	1.08	388	1.26
38	mouth	1	2	oca	0	526	29	3	685	0.54	700	0	468	2.21	150	0.52	659	1.08	106	0.24	197	1.33
38	mouth	1	3	orrore	0	485	77	6	305	1.29	356	1.74	491	1.78	400	1.38	475	1.8	450	1.71	363	1.71
38	hand	1	1	ozio	0	513	9	4	268	1.43	384	1.91	445	1.99	450	1.33	494	1.69	480	1.79	568	0.95
38	hand	1	2	palude	0	444	12	6	645	0.77	613	1.13	332	1.93	341	0.95	578	1.65	175	0.9	310	2.05
38	hand	1	3	pericolo	0	446	250	8	323	1.5	361	1.85	511	1.85	231	0.7	506	1.77	394	1.37	397	1.51
38	mouth	1	1	reputazione	0	554	27	11	215	1.01	213	1.39	411	1.76	569	0.95	282	1.85	594	1.2	619	1
38	mouth	1	3	stupore	0	514	62	7	339	1.61	440	1.68	515	1.37	366	1.18	422	1.83	496	1.55	500	1.69
38	hand	1	2	telegrafo	0	500	3	9	614	1.46	556	1.44	321	1.75	438	1.28	455	2.35	153	1.24	531	1.25
38	hand	1	1	tendenza	0	502	161	8	169	0.87	184	1.12	455	1.9	530	1.69	294	1.76	591	1.4	604	1.06
38	hand	1	3	terrore	0	481	96	7	297	1.38	408	1.87	421	1.93	326	1.08	488	1.71	455	1.7	463	2.11
38	hand	1	2	torre	0	495	44	5	656	0.63	674	0.45	423	2.02	245	0.89	579	1.63	129	0.76	228	1.59
38	hand	1	3	tradimento	0	474	73	10	363	1.2	300	1.83	464	2.05	415	1.18	485	1.88	418	1.49	432	2.04
38	hand	1	2	trattore	0	472	2	8	685	0.44	672	0.74	482	2.11	209	0.75	669	0.6	105	0.22	216	1.68
38	mouth	1	1	unanimità	0	625	37	8	241	1.46	308	2.1	306	1.6	512	1.25	369	1.62	545	1.73	632	1.11
39	hand	1	3	abbandono	0	636	91	9	297	1.55	300	1.73	397	1.79	374	1.52	413	1.71	455	1.93	505	1.65
39	hand	1	1	affermazione	0	731	59	12	274	1.85	265	1.76	516	1.38	424	1.09	376	1.86	375	1.61	425	1.56
39	mouth	1	3	agitazione	0	863	25	10	413	1.5	311	1.56	541	1.75	320	1.44	497	1.82	441	1.54	364	2.04
39	mouth	1	3	agonia	0	682	29	6	294	1.39	332	1.6	305	1.42	480	1.51	444	1.99	476	1.69	600	1.32
39	mouth	1	2	alghe	0	725	24	5	669	0.62	657	0.73	422	1.93	269	0.6	641	1.48	121	0.54	225	1.34
39	hand	1	2	alveare	0	999	11	7	679	0.42	674	0.57	421	2.32	267	1.02	609	1.44	150	0.73	363	1.74
39	mouth	1	1	analogia	0	830	8	8	206	1.34	327	1.79	418	1.55	539	0.95	313	2.1	517	1.55	620	1.2
39	hand	1	2	canoa	1		25	5	679	0.59	688	0.33	440	2.13	335	1.18	600	1.14	114	0.36	288	1.57
39	mouth	1	2	circo	0	597	43	5	616	1.16	660	0.74	453	1.83	228	0.63	626	0.92	179	0.88	205	1
39	mouth	1	1	circostanza	0	1076	70	11	273	1.7	228	1.49	412	1.73	479	1.23	331	2.09	485	1.31	642	0.61
39	hand	1	1	concetto	0	721	118	8	168	0.99	224	1.5	509	1.69	426	0.92	315	2.06	635	1.3	544	1.71
39	hand	1	3	conflitto	0	674	140	9	304	1.25	348	1.81	416	2.19	444	1.15	432	1.87	424	1.1	553	1.39
39	mouth	1	2	cravatta	0	1267	38	8	694	0.24	688	0.44	552	1.87	250	0.93	675	0.58	105	0.22	200	1.2
39	hand	1	3	disperazione	0	1370	101	12	311	1.55	428	1.74	505	1.61	389	1.35	501	1.86	459	1.43	427	1.96
39	hand	1	2	elefante	0	531	36	8	669	0.6	695	0.23	482	1.77	210	0.79	618	1.45	100	0	296	1.9
39	mouth	1	3	emergenza	0	670	161	9	315	1.64	348	1.9	500	1.6	400	1.21	474	1.88	456	1.37	509	1.42
39	hand	1	2	falce	0	754	5	5	662	0.82	632	1.3	387	1.85	365	1.04	575	1.7	129	0.56	288	1.32
39	hand	1	3	fallimento	0	613	99	10	344	1.59	263	1.74	455	1.8	420	1.28	400	1.94	450	1.69	520	1.85
39	hand	1	1	fascino	0	765	149	7	246	1.56	430	1.33	495	1.75	475	1.18	476	1.83	535	1.28	550	1.44
39	hand	1	2	flotta	0	891	35	6	600	1.2	644	0.75	442	1.71	330	0.95	582	1.66	163	0.72	375	1.9
39	mouth	1	3	fremito	0	780	11	7	335	1.79	312	1.84	273	1.33	516	1.26	304	2.03	390	1.95	600	1.44
39	mouth	1	1	funzione	0	738	185	8	273	1.33	274	1.97	414	1.34	420	1.64	341	1.89	465	1.86	592	1.5
39	hand	1	2	gallo	0	583	12	5	700	0	695	0.23	486	1.74	215	0.75	600	1.39	112	0.54	212	1.48
39	mouth	1	2	giraffa	0	735	1	7	681	0.49	674	0.69	463	2.39	181	0.54	644	1.42	106	0.24	306	1.78
39	mouth	1	3	giuramento	0	710	13	10	309	1.5	344	1.91	393	1.44	400	1.12	417	1.76	400	1.9	553	1.21
39	hand	1	3	impulso	0	713	50	7	300	1.63	300	1.89	437	1.92	452	1.28	338	1.84	506	1	463	1.56
39	mouth	1	1	indiscrezione	0	736	16	13	188	0.99	191	1.16	395	1.9	556	1.15	303	1.71	562	1.26	616	1.49
39	mouth	1	1	inefficienza	0	535	17	12	245	1.3	274	1.56	418	1.87	521	1.14	345	1.88	515	1.69	563	1.71
39	mouth	1	1	inesperienza	0	800	5	12	232	1.19	220	1.42	427	1.83	458	1.32	355	1.77	550	1.48	556	1.54
39	hand	1	1	insufficienza	0	664	15	13	265	1.67	230	1.55	416	2.03	363	1.2	388	2.09	526	1.42	503	1.49
39	hand	1	3	ira	0	548	45	3	296	1.43	391	1.98	395	2.07	400	1.21	382	1.71	474	1.42	491	1.55
39	hand	1	1	logica	0	541	107	6	220	1.42	195	1.43	536	1.38	435	1.42	362	1.92	559	1.33	580	1.76
39	hand	1	1	merito	0	696	141	6	232	1.38	235	1.67	489	1.41	352	1.23	382	1.82	556	1.5	450	1.81
39	hand	1	2	minerale	0	637	9	8	627	0.88	538	1.46	447	1.71	396	1	505	2.09	174	1.08	388	1.26
39	hand	1	2	oca	0	601	29	3	685	0.54	700	0	468	2.21	150	0.52	659	1.08	106	0.24	197	1.33
39	hand	1	3	orrore	0	673	77	6	305	1.29	356	1.74	491	1.78	400	1.38	475	1.8	450	1.71	363	1.71
39	mouth	1	1	ozio	0	534	9	4	268	1.43	384	1.91	445	1.99	450	1.33	494	1.69	480	1.79	568	0.95
39	mouth	1	2	palude	0	569	12	6	645	0.77	613	1.13	332	1.93	341	0.95	578	1.65	175	0.9	310	2.05
39	mouth	1	3	pericolo	0	659	250	8	323	1.5	361	1.85	511	1.85	231	0.7	506	1.77	394	1.37	397	1.51
39	hand	1	1	reputazione	0	917	27	11	215	1.01	213	1.39	411	1.76	569	0.95	282	1.85	594	1.2	619	1
39	hand	1	3	stupore	0	563	62	7	339	1.61	440	1.68	515	1.37	366	1.18	422	1.83	496	1.55	500	1.69
39	mouth	1	2	telegrafo	0	685	3	9	614	1.46	556	1.44	321	1.75	438	1.28	455	2.35	153	1.24	531	1.25
39	mouth	1	1	tendenza	0	769	161	8	169	0.87	184	1.12	455	1.9	530	1.69	294	1.76	591	1.4	604	1.06
39	mouth	1	3	terrore	0	597	96	7	297	1.38	408	1.87	421	1.93	326	1.08	488	1.71	455	1.7	463	2.11
39	mouth	1	2	torre	0	635	44	5	656	0.63	674	0.45	423	2.02	245	0.89	579	1.63	129	0.76	228	1.59
39	mouth	1	3	tradimento	0	834	73	10	363	1.2	300	1.83	464	2.05	415	1.18	485	1.88	418	1.49	432	2.04
39	mouth	1	2	trattore	0	685	2	8	685	0.44	672	0.74	482	2.11	209	0.75	669	0.6	105	0.22	216	1.68
39	hand	1	1	unanimità	0	1032	37	8	241	1.46	308	2.1	306	1.6	512	1.25	369	1.62	545	1.73	632	1.11
40	mouth	1	3	abbandono	0	588	91	9	297	1.55	300	1.73	397	1.79	374	1.52	413	1.71	455	1.93	505	1.65
40	mouth	1	1	affermazione	0	549	59	12	274	1.85	265	1.76	516	1.38	424	1.09	376	1.86	375	1.61	425	1.56
40	hand	1	3	agitazione	0	459	25	10	413	1.5	311	1.56	541	1.75	320	1.44	497	1.82	441	1.54	364	2.04
40	hand	1	3	agonia	0	612	29	6	294	1.39	332	1.6	305	1.42	480	1.51	444	1.99	476	1.69	600	1.32
40	hand	1	2	alghe	0	611	24	5	669	0.62	657	0.73	422	1.93	269	0.6	641	1.48	121	0.54	225	1.34
40	mouth	1	2	alveare	0	571	11	7	679	0.42	674	0.57	421	2.32	267	1.02	609	1.44	150	0.73	363	1.74
40	hand	1	1	analogia	0	442	8	8	206	1.34	327	1.79	418	1.55	539	0.95	313	2.1	517	1.55	620	1.2
40	mouth	1	2	canoa	0	637	25	5	679	0.59	688	0.33	440	2.13	335	1.18	600	1.14	114	0.36	288	1.57
40	hand	1	2	circo	0	499	43	5	616	1.16	660	0.74	453	1.83	228	0.63	626	0.92	179	0.88	205	1
40	hand	1	1	circostanza	0	461	70	11	273	1.7	228	1.49	412	1.73	479	1.23	331	2.09	485	1.31	642	0.61
40	mouth	1	1	concetto	0	572	118	8	168	0.99	224	1.5	509	1.69	426	0.92	315	2.06	635	1.3	544	1.71
40	mouth	1	3	conflitto	0	654	140	9	304	1.25	348	1.81	416	2.19	444	1.15	432	1.87	424	1.1	553	1.39
40	hand	1	2	cravatta	0	490	38	8	694	0.24	688	0.44	552	1.87	250	0.93	675	0.58	105	0.22	200	1.2
40	mouth	1	3	disperazione	0	551	101	12	311	1.55	428	1.74	505	1.61	389	1.35	501	1.86	459	1.43	427	1.96
40	mouth	1	2	elefante	0	707	36	8	669	0.6	695	0.23	482	1.77	210	0.79	618	1.45	100	0	296	1.9
40	hand	1	3	emergenza	0	505	161	9	315	1.64	348	1.9	500	1.6	400	1.21	474	1.88	456	1.37	509	1.42
40	mouth	1	2	falce	0	801	5	5	662	0.82	632	1.3	387	1.85	365	1.04	575	1.7	129	0.56	288	1.32
40	mouth	1	3	fallimento	0	617	99	10	344	1.59	263	1.74	455	1.8	420	1.28	400	1.94	450	1.69	520	1.85
40	mouth	1	1	fascino	0	473	149	7	246	1.56	430	1.33	495	1.75	475	1.18	476	1.83	535	1.28	550	1.44
40	mouth	1	2	flotta	0	641	35	6	600	1.2	644	0.75	442	1.71	330	0.95	582	1.66	163	0.72	375	1.9
40	hand	1	3	fremito	0	567	11	7	335	1.79	312	1.84	273	1.33	516	1.26	304	2.03	390	1.95	600	1.44
40	hand	1	1	funzione	0	438	185	8	273	1.33	274	1.97	414	1.34	420	1.64	341	1.89	465	1.86	592	1.5
40	mouth	1	2	gallo	0	641	12	5	700	0	695	0.23	486	1.74	215	0.75	600	1.39	112	0.54	212	1.48
40	hand	1	2	giraffa	0	507	1	7	681	0.49	674	0.69	463	2.39	181	0.54	644	1.42	106	0.24	306	1.78
40	hand	1	3	giuramento	0	590	13	10	309	1.5	344	1.91	393	1.44	400	1.12	417	1.76	400	1.9	553	1.21
40	mouth	1	3	impulso	0	426	50	7	300	1.63	300	1.89	437	1.92	452	1.28	338	1.84	506	1	463	1.56
40	hand	1	1	indiscrezione	0	951	16	13	188	0.99	191	1.16	395	1.9	556	1.15	303	1.71	562	1.26	616	1.49
40	hand	1	1	inefficienza	0	776	17	12	245	1.3	274	1.56	418	1.87	521	1.14	345	1.88	515	1.69	563	1.71
40	hand	1	1	inesperienza	0	728	5	12	232	1.19	220	1.42	427	1.83	458	1.32	355	1.77	550	1.48	556	1.54
40	mouth	1	1	insufficienza	0	606	15	13	265	1.67	230	1.55	416	2.03	363	1.2	388	2.09	526	1.42	503	1.49
40	mouth	1	3	ira	0	580	45	3	296	1.43	391	1.98	395	2.07	400	1.21	382	1.71	474	1.42	491	1.55
40	mouth	1	1	logica	0	525	107	6	220	1.42	195	1.43	536	1.38	435	1.42	362	1.92	559	1.33	580	1.76
40	mouth	1	1	merito	0	497	141	6	232	1.38	235	1.67	489	1.41	352	1.23	382	1.82	556	1.5	450	1.81
40	mouth	1	2	minerale	0	614	9	8	627	0.88	538	1.46	447	1.71	396	1	505	2.09	174	1.08	388	1.26
40	mouth	1	2	oca	0	633	29	3	685	0.54	700	0	468	2.21	150	0.52	659	1.08	106	0.24	197	1.33
40	mouth	1	3	orrore	0	585	77	6	305	1.29	356	1.74	491	1.78	400	1.38	475	1.8	450	1.71	363	1.71
40	hand	1	1	ozio	0	441	9	4	268	1.43	384	1.91	445	1.99	450	1.33	494	1.69	480	1.79	568	0.95
40	hand	1	2	palude	0	536	12	6	645	0.77	613	1.13	332	1.93	341	0.95	578	1.65	175	0.9	310	2.05
40	hand	1	3	pericolo	0	424	250	8	323	1.5	361	1.85	511	1.85	231	0.7	506	1.77	394	1.37	397	1.51
40	mouth	1	1	reputazione	0	586	27	11	215	1.01	213	1.39	411	1.76	569	0.95	282	1.85	594	1.2	619	1
40	mouth	1	3	stupore	0	645	62	7	339	1.61	440	1.68	515	1.37	366	1.18	422	1.83	496	1.55	500	1.69
40	hand	1	2	telegrafo	0	570	3	9	614	1.46	556	1.44	321	1.75	438	1.28	455	2.35	153	1.24	531	1.25
40	hand	1	1	tendenza	0	452	161	8	169	0.87	184	1.12	455	1.9	530	1.69	294	1.76	591	1.4	604	1.06
40	hand	1	3	terrore	0	430	96	7	297	1.38	408	1.87	421	1.93	326	1.08	488	1.71	455	1.7	463	2.11
40	hand	1	2	torre	0	629	44	5	656	0.63	674	0.45	423	2.02	245	0.89	579	1.63	129	0.76	228	1.59
40	hand	1	3	tradimento	0	428	73	10	363	1.2	300	1.83	464	2.05	415	1.18	485	1.88	418	1.49	432	2.04
40	hand	1	2	trattore	0	602	2	8	685	0.44	672	0.74	482	2.11	209	0.75	669	0.6	105	0.22	216	1.68
40	mouth	1	1	unanimità	0	720	37	8	241	1.46	308	2.1	306	1.6	512	1.25	369	1.62	545	1.73	632	1.11
1	hand	2	3	abbandono	0	505	91	9	297	1.55	300	1.73	397	1.79	374	1.52	413	1.71	455	1.93	505	1.65
1	hand	2	1	affermazione	0	836	59	12	274	1.85	265	1.76	516	1.38	424	1.09	376	1.86	375	1.61	425	1.56
1	mouth	2	3	agitazione	0	806	25	10	413	1.5	311	1.56	541	1.75	320	1.44	497	1.82	441	1.54	364	2.04
1	hand	2	3	agonia	0	686	29	6	294	1.39	332	1.6	305	1.42	480	1.51	444	1.99	476	1.69	600	1.32
1	mouth	2	2	alghe	0	571	24	5	669	0.62	657	0.73	422	1.93	269	0.6	641	1.48	121	0.54	225	1.34
1	mouth	2	2	alveare	0	809	11	7	679	0.42	674	0.57	421	2.32	267	1.02	609	1.44	150	0.73	363	1.74
1	mouth	2	1	analogia	0	809	8	8	206	1.34	327	1.79	418	1.55	539	0.95	313	2.1	517	1.55	620	1.2
1	hand	2	2	canoa	0	587	25	5	679	0.59	688	0.33	440	2.13	335	1.18	600	1.14	114	0.36	288	1.57
1	hand	2	2	circo	0	790	43	5	616	1.16	660	0.74	453	1.83	228	0.63	626	0.92	179	0.88	205	1
1	hand	2	1	circostanza	1		70	11	273	1.7	228	1.49	412	1.73	479	1.23	331	2.09	485	1.31	642	0.61
1	mouth	2	1	concetto	0	665	118	8	168	0.99	224	1.5	509	1.69	426	0.92	315	2.06	635	1.3	544	1.71
1	mouth	2	3	conflitto	0	756	140	9	304	1.25	348	1.81	416	2.19	444	1.15	432	1.87	424	1.1	553	1.39
1	hand	2	2	cravatta	0	561	38	8	694	0.24	688	0.44	552	1.87	250	0.93	675	0.58	105	0.22	200	1.2
1	hand	2	3	disperazione	1		101	12	311	1.55	428	1.74	505	1.61	389	1.35	501	1.86	459	1.43	427	1.96
1	mouth	2	2	elefante	1		36	8	669	0.6	695	0.23	482	1.77	210	0.79	618	1.45	100	0	296	1.9
1	mouth	2	3	emergenza	1		161	9	315	1.64	348	1.9	500	1.6	400	1.21	474	1.88	456	1.37	509	1.42
1	hand	2	2	falce	0	877	5	5	662	0.82	632	1.3	387	1.85	365	1.04	575	1.7	129	0.56	288	1.32
1	mouth	2	3	fallimento	0	1110	99	10	344	1.59	263	1.74	455	1.8	420	1.28	400	1.94	450	1.69	520	1.85
1	mouth	2	1	fascino	0	682	149	7	246	1.56	430	1.33	495	1.75	475	1.18	476	1.83	535	1.28	550	1.44
1	mouth	2	2	flotta	0	777	35	6	600	1.2	644	0.75	442	1.71	330	0.95	582	1.66	163	0.72	375	1.9
1	hand	2	3	fremito	1		11	7	335	1.79	312	1.84	273	1.33	516	1.26	304	2.03	390	1.95	600	1.44
1	hand	2	1	funzione	0	642	185	8	273	1.33	274	1.97	414	1.34	420	1.64	341	1.89	465	1.86	592	1.5
1	hand	2	2	gallo	0	688	12	5	700	0	695	0.23	486	1.74	215	0.75	600	1.39	112	0.54	212	1.48
1	mouth	2	2	giraffa	1		1	7	681	0.49	674	0.69	463	2.39	181	0.54	644	1.42	106	0.24	306	1.78
1	mouth	2	3	giuramento	0	1028	13	10	309	1.5	344	1.91	393	1.44	400	1.12	417	1.76	400	1.9	553	1.21
1	hand	2	3	impulso	0	680	50	7	300	1.63	300	1.89	437	1.92	452	1.28	338	1.84	506	1	463	1.56
1	mouth	2	1	indiscrezione	0	925	16	13	188	0.99	191	1.16	395	1.9	556	1.15	303	1.71	562	1.26	616	1.49
1	hand	2	1	inefficienza	0	1022	17	12	245	1.3	274	1.56	418	1.87	521	1.14	345	1.88	515	1.69	563	1.71
1	mouth	2	1	inesperienza	0	832	5	12	232	1.19	220	1.42	427	1.83	458	1.32	355	1.77	550	1.48	556	1.54
1	mouth	2	1	insufficienza	0	724	15	13	265	1.67	230	1.55	416	2.03	363	1.2	388	2.09	526	1.42	503	1.49
1	mouth	2	3	ira	0	831	45	3	296	1.43	391	1.98	395	2.07	400	1.21	382	1.71	474	1.42	491	1.55
1	hand	2	1	logica	0	562	107	6	220	1.42	195	1.43	536	1.38	435	1.42	362	1.92	559	1.33	580	1.76
1	hand	2	1	merito	0	625	141	6	232	1.38	235	1.67	489	1.41	352	1.23	382	1.82	556	1.5	450	1.81
1	hand	2	2	minerale	0	768	9	8	627	0.88	538	1.46	447	1.71	396	1	505	2.09	174	1.08	388	1.26
1	mouth	2	2	oca	1		29	3	685	0.54	700	0	468	2.21	150	0.52	659	1.08	106	0.24	197	1.33
1	hand	2	3	orrore	0	534	77	6	305	1.29	356	1.74	491	1.78	400	1.38	475	1.8	450	1.71	363	1.71
1	hand	2	1	ozio	0	531	9	4	268	1.43	384	1.91	445	1.99	450	1.33	494	1.69	480	1.79	568	0.95
1	mouth	2	2	palude	0	875	12	6	645	0.77	613	1.13	332	1.93	341	0.95	578	1.65	175	0.9	310	2.05
1	hand	2	3	pericolo	1		250	8	323	1.5	361	1.85	511	1.85	231	0.7	506	1.77	394	1.37	397	1.51
1	hand	2	1	reputazione	1		27	11	215	1.01	213	1.39	411	1.76	569	0.95	282	1.85	594	1.2	619	1
1	mouth	2	3	stupore	1		62	7	339	1.61	440	1.68	515	1.37	366	1.18	422	1.83	496	1.55	500	1.69
1	hand	2	2	telegrafo	1		3	9	614	1.46	556	1.44	321	1.75	438	1.28	455	2.35	153	1.24	531	1.25
1	mouth	2	1	tendenza	0	990	161	8	169	0.87	184	1.12	455	1.9	530	1.69	294	1.76	591	1.4	604	1.06
1	hand	2	3	terrore	0	800	96	7	297	1.38	408	1.87	421	1.93	326	1.08	488	1.71	455	1.7	463	2.11
1	mouth	2	2	torre	0	633	44	5	656	0.63	674	0.45	423	2.02	245	0.89	579	1.63	129	0.76	228	1.59
1	mouth	2	3	tradimento	1		73	10	363	1.2	300	1.83	464	2.05	415	1.18	485	1.88	418	1.49	432	2.04
1	hand	2	2	trattore	1		2	8	685	0.44	672	0.74	482	2.11	209	0.75	669	0.6	105	0.22	216	1.68
1	mouth	2	1	unanimità	1		37	8	241	1.46	308	2.1	306	1.6	512	1.25	369	1.62	545	1.73	632	1.11
2	mouth	2	3	abbandono	1		91	9	297	1.55	300	1.73	397	1.79	374	1.52	413	1.71	455	1.93	505	1.65
2	mouth	2	1	affermazione	0	1036	59	12	274	1.85	265	1.76	516	1.38	424	1.09	376	1.86	375	1.61	425	1.56
2	hand	2	3	agitazione	0	558	25	10	413	1.5	311	1.56	541	1.75	320	1.44	497	1.82	441	1.54	364	2.04
2	mouth	2	3	agonia	0	694	29	6	294	1.39	332	1.6	305	1.42	480	1.51	444	1.99	476	1.69	600	1.32
2	hand	2	2	alghe	0	513	24	5	669	0.62	657	0.73	422	1.93	269	0.6	641	1.48	121	0.54	225	1.34
2	hand	2	2	alveare	0	661	11	7	679	0.42	674	0.57	421	2.32	267	1.02	609	1.44	150	0.73	363	1.74
2	hand	2	1	analogia	1		8	8	206	1.34	327	1.79	418	1.55	539	0.95	313	2.1	517	1.55	620	1.2
2	mouth	2	2	canoa	0	625	25	5	679	0.59	688	0.33	440	2.13	335	1.18	600	1.14	114	0.36	288	1.57
2	mouth	2	2	circo	0	1483	43	5	616	1.16	660	0.74	453	1.83	228	0.63	626	0.92	179	0.88	205	1
2	mouth	2	1	circostanza	0	1367	70	11	273	1.7	228	1.49	412	1.73	479	1.23	331	2.09	485	1.31	642	0.61
2	hand	2	1	concetto	0	858	118	8	168	0.99	224	1.5	509	1.69	426	0.92	315	2.06	635	1.3	544	1.71
2	hand	2	3	conflitto	0	837	140	9	304	1.25	348	1.81	416	2.19	444	1.15	432	1.87	424	1.1	553	1.39
2	mouth	2	2	cravatta	0	611	38	8	694	0.24	688	0.44	552	1.87	250	0.93	675	0.58	105	0.22	200	1.2
2	mouth	2	3	disperazione	0	772	101	12	311	1.55	428	1.74	505	1.61	389	1.35	501	1.86	459	1.43	427	1.96
2	hand	2	2	elefante	0	838	36	8	669	0.6	695	0.23	482	1.77	210	0.79	618	1.45	100	0	296	1.9
2	hand	2	3	emergenza	0	703	161	9	315	1.64	348	1.9	500	1.6	400	1.21	474	1.88	456	1.37	509	1.42
2	mouth	2	2	falce	0	628	5	5	662	0.82	632	1.3	387	1.85	365	1.04	575	1.7	129	0.56	288	1.32
2	hand	2	3	fallimento	0	760	99	10	344	1.59	263	1.74	455	1.8	420	1.28	400	1.94	450	1.69	520	1.85
2	hand	2	1	fascino	0	922	149	7	246	1.56	430	1.33	495	1.75	475	1.18	476	1.83	535	1.28	550	1.44
2	hand	2	2	flotta	0	636	35	6	600	1.2	644	0.75	442	1.71	330	0.95	582	1.66	163	0.72	375	1.9
2	mouth	2	3	fremito	0	782	11	7	335	1.79	312	1.84	273	1.33	516	1.26	304	2.03	390	1.95	600	1.44
2	mouth	2	1	funzione	0	727	185	8	273	1.33	274	1.97	414	1.34	420	1.64	341	1.89	465	1.86	592	1.5
2	mouth	2	2	gallo	0	783	12	5	700	0	695	0.23	486	1.74	215	0.75	600	1.39	112	0.54	212	1.48
2	hand	2	2	giraffa	0	634	1	7	681	0.49	674	0.69	463	2.39	181	0.54	644	1.42	106	0.24	306	1.78
2	hand	2	3	giuramento	0	646	13	10	309	1.5	344	1.91	393	1.44	400	1.12	417	1.76	400	1.9	553	1.21
2	mouth	2	3	impulso	0	1026	50	7	300	1.63	300	1.89	437	1.92	452	1.28	338	1.84	506	1	463	1.56
2	hand	2	1	indiscrezione	0	880	16	13	188	0.99	191	1.16	395	1.9	556	1.15	303	1.71	562	1.26	616	1.49
2	mouth	2	1	inefficienza	1		17	12	245	1.3	274	1.56	418	1.87	521	1.14	345	1.88	515	1.69	563	1.71
2	hand	2	1	inesperienza	1		5	12	232	1.19	220	1.42	427	1.83	458	1.32	355	1.77	550	1.48	556	1.54
2	hand	2	1	insufficienza	0	919	15	13	265	1.67	230	1.55	416	2.03	363	1.2	388	2.09	526	1.42	503	1.49
2	hand	2	3	ira	0	632	45	3	296	1.43	391	1.98	395	2.07	400	1.21	382	1.71	474	1.42	491	1.55
[truncated: 1,841 more rows]

## Sheet: Experiment2
Subject	effector	task	concept	stimulus	accuracy	RT	freq	n.lett	CNC	CNCSd	IMG	IMGSd	FAM	FAMSd	AoA	AoASd	CA	CASd	ABS	ABSSd	MoA	MoASd
1	hand	1	3	abbandono	0	1269	91	9	297	1.55	300	1.73	397	1.79	374	1.52	413	1.71	455	1.93	505	1.65
1	hand	1	1	affermazione	0	930	59	12	274	1.85	265	1.76	516	1.38	424	1.09	376	1.86	375	1.61	425	1.56
1	mouth	1	3	agitazione	0	732	25	10	413	1.5	311	1.56	541	1.75	320	1.44	497	1.82	441	1.54	364	2.04
1	mouth	1	3	agonia	0	934	29	6	294	1.39	332	1.6	305	1.42	480	1.51	444	1.99	476	1.69	600	1.32
1	mouth	1	2	alghe	0	992	24	5	669	0.62	657	0.73	422	1.93	269	0.6	641	1.48	121	0.54	225	1.34
1	hand	1	2	alveare	0	1080	11	7	679	0.42	674	0.57	421	2.32	267	1.02	609	1.44	150	0.73	363	1.74
1	mouth	1	1	analogia	1		8	8	206	1.34	327	1.79	418	1.55	539	0.95	313	2.1	517	1.55	620	1.2
1	hand	1	2	canoa	0	945	25	5	679	0.59	688	0.33	440	2.13	335	1.18	600	1.14	114	0.36	288	1.57
1	mouth	1	2	circo	0	868	43	5	616	1.16	660	0.74	453	1.83	228	0.63	626	0.92	179	0.88	205	1
1	mouth	1	1	circostanza	0	761	70	11	273	1.7	228	1.49	412	1.73	479	1.23	331	2.09	485	1.31	642	0.61
1	hand	1	1	concetto	0	836	118	8	168	0.99	224	1.5	509	1.69	426	0.92	315	2.06	635	1.3	544	1.71
1	hand	1	3	conflitto	0	824	140	9	304	1.25	348	1.81	416	2.19	444	1.15	432	1.87	424	1.1	553	1.39
1	mouth	1	2	cravatta	0	825	38	8	694	0.24	688	0.44	552	1.87	250	0.93	675	0.58	105	0.22	200	1.2
1	hand	1	3	disperazione	0	1078	101	12	311	1.55	428	1.74	505	1.61	389	1.35	501	1.86	459	1.43	427	1.96
1	hand	1	2	elefante	0	999	36	8	669	0.6	695	0.23	482	1.77	210	0.79	618	1.45	100	0	296	1.9
1	mouth	1	3	emergenza	0	1064	161	9	315	1.64	348	1.9	500	1.6	400	1.21	474	1.88	456	1.37	509	1.42
1	hand	1	2	falce	0	1056	5	5	662	0.82	632	1.3	387	1.85	365	1.04	575	1.7	129	0.56	288	1.32
1	hand	1	3	fallimento	0	751	99	10	344	1.59	263	1.74	455	1.8	420	1.28	400	1.94	450	1.69	520	1.85
1	hand	1	1	fascino	0	1187	149	7	246	1.56	430	1.33	495	1.75	475	1.18	476	1.83	535	1.28	550	1.44
1	hand	1	2	flotta	0	818	35	6	600	1.2	644	0.75	442	1.71	330	0.95	582	1.66	163	0.72	375	1.9
1	mouth	1	3	fremito	0	1007	11	7	335	1.79	312	1.84	273	1.33	516	1.26	304	2.03	390	1.95	600	1.44
1	mouth	1	1	funzione	1		185	8	273	1.33	274	1.97	414	1.34	420	1.64	341	1.89	465	1.86	592	1.5
1	hand	1	2	gallo	0	889	12	5	700	0	695	0.23	486	1.74	215	0.75	600	1.39	112	0.54	212	1.48
1	mouth	1	2	giraffa	0	797	1	7	681	0.49	674	0.69	463	2.39	181	0.54	644	1.42	106	0.24	306	1.78
1	mouth	1	3	giuramento	0	1107	13	10	309	1.5	344	1.91	393	1.44	400	1.12	417	1.76	400	1.9	553	1.21
1	hand	1	3	impulso	0	680	50	7	300	1.63	300	1.89	437	1.92	452	1.28	338	1.84	506	1	463	1.56
1	mouth	1	1	indiscrezione	0	1009	16	13	188	0.99	191	1.16	395	1.9	556	1.15	303	1.71	562	1.26	616	1.49
1	mouth	1	1	inefficienza	0	629	17	12	245	1.3	274	1.56	418	1.87	521	1.14	345	1.88	515	1.69	563	1.71
1	mouth	1	1	inesperienza	0	795	5	12	232	1.19	220	1.42	427	1.83	458	1.32	355	1.77	550	1.48	556	1.54
1	hand	1	1	insufficienza	0	921	15	13	265	1.67	230	1.55	416	2.03	363	1.2	388	2.09	526	1.42	503	1.49
1	hand	1	3	ira	0	821	45	3	296	1.43	391	1.98	395	2.07	400	1.21	382	1.71	474	1.42	491	1.55
1	hand	1	1	logica	0	755	107	6	220	1.42	195	1.43	536	1.38	435	1.42	362	1.92	559	1.33	580	1.76
1	hand	1	1	merito	0	1288	141	6	232	1.38	235	1.67	489	1.41	352	1.23	382	1.82	556	1.5	450	1.81
1	hand	1	2	minerale	0	947	9	8	627	0.88	538	1.46	447	1.71	396	1	505	2.09	174	1.08	388	1.26
1	hand	1	2	oca	0	654	29	3	685	0.54	700	0	468	2.21	150	0.52	659	1.08	106	0.24	197	1.33
1	hand	1	3	orrore	1		77	6	305	1.29	356	1.74	491	1.78	400	1.38	475	1.8	450	1.71	363	1.71
1	mouth	1	1	ozio	0	834	9	4	268	1.43	384	1.91	445	1.99	450	1.33	494	1.69	480	1.79	568	0.95
1	mouth	1	2	palude	0	829	12	6	645	0.77	613	1.13	332	1.93	341	0.95	578	1.65	175	0.9	310	2.05
1	mouth	1	3	pericolo	1		250	8	323	1.5	361	1.85	511	1.85	231	0.7	506	1.77	394	1.37	397	1.51
1	hand	1	1	reputazione	0	1370	27	11	215	1.01	213	1.39	411	1.76	569	0.95	282	1.85	594	1.2	619	1
1	hand	1	3	stupore	0	748	62	7	339	1.61	440	1.68	515	1.37	366	1.18	422	1.83	496	1.55	500	1.69
1	mouth	1	2	telegrafo	0	823	3	9	614	1.46	556	1.44	321	1.75	438	1.28	455	2.35	153	1.24	531	1.25
1	mouth	1	1	tendenza	0	933	161	8	169	0.87	184	1.12	455	1.9	530	1.69	294	1.76	591	1.4	604	1.06
1	mouth	1	3	terrore	0	933	96	7	297	1.38	408	1.87	421	1.93	326	1.08	488	1.71	455	1.7	463	2.11
1	mouth	1	2	torre	0	795	44	5	656	0.63	674	0.45	423	2.02	245	0.89	579	1.63	129	0.76	228	1.59
1	mouth	1	3	tradimento	0	852	73	10	363	1.2	300	1.83	464	2.05	415	1.18	485	1.88	418	1.49	432	2.04
1	mouth	1	2	trattore	0	860	2	8	685	0.44	672	0.74	482	2.11	209	0.75	669	0.6	105	0.22	216	1.68
1	hand	1	1	unanimità	0	1201	37	8	241	1.46	308	2.1	306	1.6	512	1.25	369	1.62	545	1.73	632	1.11
2	hand	1	3	abbandono	1		91	9	297	1.55	300	1.73	397	1.79	374	1.52	413	1.71	455	1.93	505	1.65
2	hand	1	1	affermazione	1		59	12	274	1.85	265	1.76	516	1.38	424	1.09	376	1.86	375	1.61	425	1.56
2	mouth	1	3	agitazione	0	799	25	10	413	1.5	311	1.56	541	1.75	320	1.44	497	1.82	441	1.54	364	2.04
2	mouth	1	3	agonia	0	809	29	6	294	1.39	332	1.6	305	1.42	480	1.51	444	1.99	476	1.69	600	1.32
2	mouth	1	2	alghe	0	738	24	5	669	0.62	657	0.73	422	1.93	269	0.6	641	1.48	121	0.54	225	1.34
2	hand	1	2	alveare	0	1294	11	7	679	0.42	674	0.57	421	2.32	267	1.02	609	1.44	150	0.73	363	1.74
2	mouth	1	1	analogia	0	909	8	8	206	1.34	327	1.79	418	1.55	539	0.95	313	2.1	517	1.55	620	1.2
2	hand	1	2	canoa	0	1092	25	5	679	0.59	688	0.33	440	2.13	335	1.18	600	1.14	114	0.36	288	1.57
2	mouth	1	2	circo	0	689	43	5	616	1.16	660	0.74	453	1.83	228	0.63	626	0.92	179	0.88	205	1
2	mouth	1	1	circostanza	0	1285	70	11	273	1.7	228	1.49	412	1.73	479	1.23	331	2.09	485	1.31	642	0.61
2	hand	1	1	concetto	0	706	118	8	168	0.99	224	1.5	509	1.69	426	0.92	315	2.06	635	1.3	544	1.71
2	hand	1	3	conflitto	0	1067	140	9	304	1.25	348	1.81	416	2.19	444	1.15	432	1.87	424	1.1	553	1.39
2	mouth	1	2	cravatta	0	891	38	8	694	0.24	688	0.44	552	1.87	250	0.93	675	0.58	105	0.22	200	1.2
2	hand	1	3	disperazione	0	1224	101	12	311	1.55	428	1.74	505	1.61	389	1.35	501	1.86	459	1.43	427	1.96
2	hand	1	2	elefante	0	1261	36	8	669	0.6	695	0.23	482	1.77	210	0.79	618	1.45	100	0	296	1.9
2	mouth	1	3	emergenza	0	1343	161	9	315	1.64	348	1.9	500	1.6	400	1.21	474	1.88	456	1.37	509	1.42
2	hand	1	2	falce	0	1365	5	5	662	0.82	632	1.3	387	1.85	365	1.04	575	1.7	129	0.56	288	1.32
2	hand	1	3	fallimento	0	972	99	10	344	1.59	263	1.74	455	1.8	420	1.28	400	1.94	450	1.69	520	1.85
2	hand	1	1	fascino	0	1288	149	7	246	1.56	430	1.33	495	1.75	475	1.18	476	1.83	535	1.28	550	1.44
2	hand	1	2	flotta	0	723	35	6	600	1.2	644	0.75	442	1.71	330	0.95	582	1.66	163	0.72	375	1.9
2	mouth	1	3	fremito	0	1275	11	7	335	1.79	312	1.84	273	1.33	516	1.26	304	2.03	390	1.95	600	1.44
2	mouth	1	1	funzione	0	617	185	8	273	1.33	274	1.97	414	1.34	420	1.64	341	1.89	465	1.86	592	1.5
2	hand	1	2	gallo	0	740	12	5	700	0	695	0.23	486	1.74	215	0.75	600	1.39	112	0.54	212	1.48
2	mouth	1	2	giraffa	0	1270	1	7	681	0.49	674	0.69	463	2.39	181	0.54	644	1.42	106	0.24	306	1.78
2	mouth	1	3	giuramento	1		13	10	309	1.5	344	1.91	393	1.44	400	1.12	417	1.76	400	1.9	553	1.21
2	hand	1	3	impulso	0	1187	50	7	300	1.63	300	1.89	437	1.92	452	1.28	338	1.84	506	1	463	1.56
2	mouth	1	1	indiscrezione	0	1441	16	13	188	0.99	191	1.16	395	1.9	556	1.15	303	1.71	562	1.26	616	1.49
2	mouth	1	1	inefficienza	0	780	17	12	245	1.3	274	1.56	418	1.87	521	1.14	345	1.88	515	1.69	563	1.71
2	mouth	1	1	inesperienza	1		5	12	232	1.19	220	1.42	427	1.83	458	1.32	355	1.77	550	1.48	556	1.54
2	hand	1	1	insufficienza	0	739	15	13	265	1.67	230	1.55	416	2.03	363	1.2	388	2.09	526	1.42	503	1.49
2	hand	1	3	ira	0	742	45	3	296	1.43	391	1.98	395	2.07	400	1.21	382	1.71	474	1.42	491	1.55
2	hand	1	1	logica	0	870	107	6	220	1.42	195	1.43	536	1.38	435	1.42	362	1.92	559	1.33	580	1.76
2	hand	1	1	merito	0	954	141	6	232	1.38	235	1.67	489	1.41	352	1.23	382	1.82	556	1.5	450	1.81
2	hand	1	2	minerale	0	921	9	8	627	0.88	538	1.46	447	1.71	396	1	505	2.09	174	1.08	388	1.26
2	hand	1	2	oca	1		29	3	685	0.54	700	0	468	2.21	150	0.52	659	1.08	106	0.24	197	1.33
2	hand	1	3	orrore	0	1051	77	6	305	1.29	356	1.74	491	1.78	400	1.38	475	1.8	450	1.71	363	1.71
2	mouth	1	1	ozio	0	624	9	4	268	1.43	384	1.91	445	1.99	450	1.33	494	1.69	480	1.79	568	0.95
2	mouth	1	2	palude	0	1126	12	6	645	0.77	613	1.13	332	1.93	341	0.95	578	1.65	175	0.9	310	2.05
2	mouth	1	3	pericolo	0	1116	250	8	323	1.5	361	1.85	511	1.85	231	0.7	506	1.77	394	1.37	397	1.51
2	hand	1	1	reputazione	0	891	27	11	215	1.01	213	1.39	411	1.76	569	0.95	282	1.85	594	1.2	619	1
2	hand	1	3	stupore	0	817	62	7	339	1.61	440	1.68	515	1.37	366	1.18	422	1.83	496	1.55	500	1.69
2	mouth	1	2	telegrafo	0	822	3	9	614	1.46	556	1.44	321	1.75	438	1.28	455	2.35	153	1.24	531	1.25
2	mouth	1	1	tendenza	0	926	161	8	169	0.87	184	1.12	455	1.9	530	1.69	294	1.76	591	1.4	604	1.06
2	mouth	1	3	terrore	0	1243	96	7	297	1.38	408	1.87	421	1.93	326	1.08	488	1.71	455	1.7	463	2.11
2	mouth	1	2	torre	0	571	44	5	656	0.63	674	0.45	423	2.02	245	0.89	579	1.63	129	0.76	228	1.59
2	mouth	1	3	tradimento	0	840	73	10	363	1.2	300	1.83	464	2.05	415	1.18	485	1.88	418	1.49	432	2.04
2	mouth	1	2	trattore	0	873	2	8	685	0.44	672	0.74	482	2.11	209	0.75	669	0.6	105	0.22	216	1.68
2	hand	1	1	unanimità	0	1402	37	8	241	1.46	308	2.1	306	1.6	512	1.25	369	1.62	545	1.73	632	1.11
3	mouth	1	3	abbandono	0	804	91	9	297	1.55	300	1.73	397	1.79	374	1.52	413	1.71	455	1.93	505	1.65
3	mouth	1	1	affermazione	0	1008	59	12	274	1.85	265	1.76	516	1.38	424	1.09	376	1.86	375	1.61	425	1.56
3	hand	1	3	agitazione	0	989	25	10	413	1.5	311	1.56	541	1.75	320	1.44	497	1.82	441	1.54	364	2.04
3	hand	1	3	agonia	0	760	29	6	294	1.39	332	1.6	305	1.42	480	1.51	444	1.99	476	1.69	600	1.32
3	hand	1	2	alghe	0	923	24	5	669	0.62	657	0.73	422	1.93	269	0.6	641	1.48	121	0.54	225	1.34
3	mouth	1	2	alveare	0	1038	11	7	679	0.42	674	0.57	421	2.32	267	1.02	609	1.44	150	0.73	363	1.74
3	hand	1	1	analogia	0	901	8	8	206	1.34	327	1.79	418	1.55	539	0.95	313	2.1	517	1.55	620	1.2
3	mouth	1	2	canoa	0	1078	25	5	679	0.59	688	0.33	440	2.13	335	1.18	600	1.14	114	0.36	288	1.57
3	hand	1	2	circo	0	1091	43	5	616	1.16	660	0.74	453	1.83	228	0.63	626	0.92	179	0.88	205	1
3	hand	1	1	circostanza	0	1259	70	11	273	1.7	228	1.49	412	1.73	479	1.23	331	2.09	485	1.31	642	0.61
3	mouth	1	1	concetto	0	793	118	8	168	0.99	224	1.5	509	1.69	426	0.92	315	2.06	635	1.3	544	1.71
3	mouth	1	3	conflitto	0	859	140	9	304	1.25	348	1.81	416	2.19	444	1.15	432	1.87	424	1.1	553	1.39
3	hand	1	2	cravatta	0	860	38	8	694	0.24	688	0.44	552	1.87	250	0.93	675	0.58	105	0.22	200	1.2
3	mouth	1	3	disperazione	0	1017	101	12	311	1.55	428	1.74	505	1.61	389	1.35	501	1.86	459	1.43	427	1.96
3	mouth	1	2	elefante	0	814	36	8	669	0.6	695	0.23	482	1.77	210	0.79	618	1.45	100	0	296	1.9
3	hand	1	3	emergenza	0	846	161	9	315	1.64	348	1.9	500	1.6	400	1.21	474	1.88	456	1.37	509	1.42
3	mouth	1	2	falce	1		5	5	662	0.82	632	1.3	387	1.85	365	1.04	575	1.7	129	0.56	288	1.32
3	mouth	1	3	fallimento	0	976	99	10	344	1.59	263	1.74	455	1.8	420	1.28	400	1.94	450	1.69	520	1.85
3	mouth	1	1	fascino	0	823	149	7	246	1.56	430	1.33	495	1.75	475	1.18	476	1.83	535	1.28	550	1.44
3	mouth	1	2	flotta	0	978	35	6	600	1.2	644	0.75	442	1.71	330	0.95	582	1.66	163	0.72	375	1.9
3	hand	1	3	fremito	1		11	7	335	1.79	312	1.84	273	1.33	516	1.26	304	2.03	390	1.95	600	1.44
3	hand	1	1	funzione	0	985	185	8	273	1.33	274	1.97	414	1.34	420	1.64	341	1.89	465	1.86	592	1.5
3	mouth	1	2	gallo	0	830	12	5	700	0	695	0.23	486	1.74	215	0.75	600	1.39	112	0.54	212	1.48
3	hand	1	2	giraffa	0	1240	1	7	681	0.49	674	0.69	463	2.39	181	0.54	644	1.42	106	0.24	306	1.78
3	hand	1	3	giuramento	0	1011	13	10	309	1.5	344	1.91	393	1.44	400	1.12	417	1.76	400	1.9	553	1.21
3	mouth	1	3	impulso	0	908	50	7	300	1.63	300	1.89	437	1.92	452	1.28	338	1.84	506	1	463	1.56
3	hand	1	1	indiscrezione	0	928	16	13	188	0.99	191	1.16	395	1.9	556	1.15	303	1.71	562	1.26	616	1.49
3	hand	1	1	inefficienza	0	1317	17	12	245	1.3	274	1.56	418	1.87	521	1.14	345	1.88	515	1.69	563	1.71
3	hand	1	1	inesperienza	0	811	5	12	232	1.19	220	1.42	427	1.83	458	1.32	355	1.77	550	1.48	556	1.54
3	mouth	1	1	insufficienza	0	1080	15	13	265	1.67	230	1.55	416	2.03	363	1.2	388	2.09	526	1.42	503	1.49
3	mouth	1	3	ira	0	900	45	3	296	1.43	391	1.98	395	2.07	400	1.21	382	1.71	474	1.42	491	1.55
3	mouth	1	1	logica	0	1364	107	6	220	1.42	195	1.43	536	1.38	435	1.42	362	1.92	559	1.33	580	1.76
3	mouth	1	1	merito	0	987	141	6	232	1.38	235	1.67	489	1.41	352	1.23	382	1.82	556	1.5	450	1.81
3	mouth	1	2	minerale	0	1218	9	8	627	0.88	538	1.46	447	1.71	396	1	505	2.09	174	1.08	388	1.26
3	mouth	1	2	oca	0	772	29	3	685	0.54	700	0	468	2.21	150	0.52	659	1.08	106	0.24	197	1.33
3	mouth	1	3	orrore	0	946	77	6	305	1.29	356	1.74	491	1.78	400	1.38	475	1.8	450	1.71	363	1.71
3	hand	1	1	ozio	0	1123	9	4	268	1.43	384	1.91	445	1.99	450	1.33	494	1.69	480	1.79	568	0.95
3	hand	1	2	palude	0	1032	12	6	645	0.77	613	1.13	332	1.93	341	0.95	578	1.65	175	0.9	310	2.05
3	hand	1	3	pericolo	0	790	250	8	323	1.5	361	1.85	511	1.85	231	0.7	506	1.77	394	1.37	397	1.51
3	mouth	1	1	reputazione	0	1039	27	11	215	1.01	213	1.39	411	1.76	569	0.95	282	1.85	594	1.2	619	1
3	mouth	1	3	stupore	0	799	62	7	339	1.61	440	1.68	515	1.37	366	1.18	422	1.83	496	1.55	500	1.69
3	hand	1	2	telegrafo	0	962	3	9	614	1.46	556	1.44	321	1.75	438	1.28	455	2.35	153	1.24	531	1.25
3	hand	1	1	tendenza	0	912	161	8	169	0.87	184	1.12	455	1.9	530	1.69	294	1.76	591	1.4	604	1.06
3	hand	1	3	terrore	0	962	96	7	297	1.38	408	1.87	421	1.93	326	1.08	488	1.71	455	1.7	463	2.11
3	hand	1	2	torre	0	810	44	5	656	0.63	674	0.45	423	2.02	245	0.89	579	1.63	129	0.76	228	1.59
3	hand	1	3	tradimento	0	899	73	10	363	1.2	300	1.83	464	2.05	415	1.18	485	1.88	418	1.49	432	2.04
3	hand	1	2	trattore	0	838	2	8	685	0.44	672	0.74	482	2.11	209	0.75	669	0.6	105	0.22	216	1.68
3	mouth	1	1	unanimità	0	1286	37	8	241	1.46	308	2.1	306	1.6	512	1.25	369	1.62	545	1.73	632	1.11
4	mouth	1	3	abbandono	0	758	91	9	297	1.55	300	1.73	397	1.79	374	1.52	413	1.71	455	1.93	505	1.65
4	mouth	1	1	affermazione	0	972	59	12	274	1.85	265	1.76	516	1.38	424	1.09	376	1.86	375	1.61	425	1.56
4	hand	1	3	agitazione	0	679	25	10	413	1.5	311	1.56	541	1.75	320	1.44	497	1.82	441	1.54	364	2.04
4	hand	1	3	agonia	0	607	29	6	294	1.39	332	1.6	305	1.42	480	1.51	444	1.99	476	1.69	600	1.32
4	hand	1	2	alghe	0	879	24	5	669	0.62	657	0.73	422	1.93	269	0.6	641	1.48	121	0.54	225	1.34
4	mouth	1	2	alveare	0	762	11	7	679	0.42	674	0.57	421	2.32	267	1.02	609	1.44	150	0.73	363	1.74
4	hand	1	1	analogia	0	545	8	8	206	1.34	327	1.79	418	1.55	539	0.95	313	2.1	517	1.55	620	1.2
4	mouth	1	2	canoa	0	674	25	5	679	0.59	688	0.33	440	2.13	335	1.18	600	1.14	114	0.36	288	1.57
4	hand	1	2	circo	0	685	43	5	616	1.16	660	0.74	453	1.83	228	0.63	626	0.92	179	0.88	205	1
4	hand	1	1	circostanza	0	932	70	11	273	1.7	228	1.49	412	1.73	479	1.23	331	2.09	485	1.31	642	0.61
4	mouth	1	1	concetto	0	1103	118	8	168	0.99	224	1.5	509	1.69	426	0.92	315	2.06	635	1.3	544	1.71
4	mouth	1	3	conflitto	0	691	140	9	304	1.25	348	1.81	416	2.19	444	1.15	432	1.87	424	1.1	553	1.39
4	hand	1	2	cravatta	0	520	38	8	694	0.24	688	0.44	552	1.87	250	0.93	675	0.58	105	0.22	200	1.2
4	mouth	1	3	disperazione	0	608	101	12	311	1.55	428	1.74	505	1.61	389	1.35	501	1.86	459	1.43	427	1.96
4	mouth	1	2	elefante	0	730	36	8	669	0.6	695	0.23	482	1.77	210	0.79	618	1.45	100	0	296	1.9
4	hand	1	3	emergenza	0	843	161	9	315	1.64	348	1.9	500	1.6	400	1.21	474	1.88	456	1.37	509	1.42
4	mouth	1	2	falce	0	628	5	5	662	0.82	632	1.3	387	1.85	365	1.04	575	1.7	129	0.56	288	1.32
4	mouth	1	3	fallimento	0	1291	99	10	344	1.59	263	1.74	455	1.8	420	1.28	400	1.94	450	1.69	520	1.85
4	mouth	1	1	fascino	0	548	149	7	246	1.56	430	1.33	495	1.75	475	1.18	476	1.83	535	1.28	550	1.44
4	mouth	1	2	flotta	0	1310	35	6	600	1.2	644	0.75	442	1.71	330	0.95	582	1.66	163	0.72	375	1.9
4	hand	1	3	fremito	0	743	11	7	335	1.79	312	1.84	273	1.33	516	1.26	304	2.03	390	1.95	600	1.44
4	hand	1	1	funzione	0	734	185	8	273	1.33	274	1.97	414	1.34	420	1.64	341	1.89	465	1.86	592	1.5
4	mouth	1	2	gallo	0	940	12	5	700	0	695	0.23	486	1.74	215	0.75	600	1.39	112	0.54	212	1.48
4	hand	1	2	giraffa	0	502	1	7	681	0.49	674	0.69	463	2.39	181	0.54	644	1.42	106	0.24	306	1.78
4	hand	1	3	giuramento	0	618	13	10	309	1.5	344	1.91	393	1.44	400	1.12	417	1.76	400	1.9	553	1.21
4	mouth	1	3	impulso	0	754	50	7	300	1.63	300	1.89	437	1.92	452	1.28	338	1.84	506	1	463	1.56
4	hand	1	1	indiscrezione	0	685	16	13	188	0.99	191	1.16	395	1.9	556	1.15	303	1.71	562	1.26	616	1.49
4	hand	1	1	inefficienza	0	1054	17	12	245	1.3	274	1.56	418	1.87	521	1.14	345	1.88	515	1.69	563	1.71
4	hand	1	1	inesperienza	0	1123	5	12	232	1.19	220	1.42	427	1.83	458	1.32	355	1.77	550	1.48	556	1.54
4	mouth	1	1	insufficienza	0	702	15	13	265	1.67	230	1.55	416	2.03	363	1.2	388	2.09	526	1.42	503	1.49
4	mouth	1	3	ira	0	805	45	3	296	1.43	391	1.98	395	2.07	400	1.21	382	1.71	474	1.42	491	1.55
4	mouth	1	1	logica	0	497	107	6	220	1.42	195	1.43	536	1.38	435	1.42	362	1.92	559	1.33	580	1.76
4	mouth	1	1	merito	0	718	141	6	232	1.38	235	1.67	489	1.41	352	1.23	382	1.82	556	1.5	450	1.81
4	mouth	1	2	minerale	0	719	9	8	627	0.88	538	1.46	447	1.71	396	1	505	2.09	174	1.08	388	1.26
4	mouth	1	2	oca	0	669	29	3	685	0.54	700	0	468	2.21	150	0.52	659	1.08	106	0.24	197	1.33
4	mouth	1	3	orrore	0	938	77	6	305	1.29	356	1.74	491	1.78	400	1.38	475	1.8	450	1.71	363	1.71
4	hand	1	1	ozio	0	682	9	4	268	1.43	384	1.91	445	1.99	450	1.33	494	1.69	480	1.79	568	0.95
4	hand	1	2	palude	0	634	12	6	645	0.77	613	1.13	332	1.93	341	0.95	578	1.65	175	0.9	310	2.05
4	hand	1	3	pericolo	0	634	250	8	323	1.5	361	1.85	511	1.85	231	0.7	506	1.77	394	1.37	397	1.51
4	mouth	1	1	reputazione	0	653	27	11	215	1.01	213	1.39	411	1.76	569	0.95	282	1.85	594	1.2	619	1
4	mouth	1	3	stupore	0	659	62	7	339	1.61	440	1.68	515	1.37	366	1.18	422	1.83	496	1.55	500	1.69
4	hand	1	2	telegrafo	0	523	3	9	614	1.46	556	1.44	321	1.75	438	1.28	455	2.35	153	1.24	531	1.25
4	hand	1	1	tendenza	0	1415	161	8	169	0.87	184	1.12	455	1.9	530	1.69	294	1.76	591	1.4	604	1.06
4	hand	1	3	terrore	0	643	96	7	297	1.38	408	1.87	421	1.93	326	1.08	488	1.71	455	1.7	463	2.11
4	hand	1	2	torre	0	641	44	5	656	0.63	674	0.45	423	2.02	245	0.89	579	1.63	129	0.76	228	1.59
4	hand	1	3	tradimento	0	687	73	10	363	1.2	300	1.83	464	2.05	415	1.18	485	1.88	418	1.49	432	2.04
4	hand	1	2	trattore	0	695	2	8	685	0.44	672	0.74	482	2.11	209	0.75	669	0.6	105	0.22	216	1.68
4	mouth	1	1	unanimità	0	684	37	8	241	1.46	308	2.1	306	1.6	512	1.25	369	1.62	545	1.73	632	1.11
5	hand	1	3	abbandono	0	1310	91	9	297	1.55	300	1.73	397	1.79	374	1.52	413	1.71	455	1.93	505	1.65
5	hand	1	1	affermazione	0	849	59	12	274	1.85	265	1.76	516	1.38	424	1.09	376	1.86	375	1.61	425	1.56
5	mouth	1	3	agitazione	0	570	25	10	413	1.5	311	1.56	541	1.75	320	1.44	497	1.82	441	1.54	364	2.04
5	mouth	1	3	agonia	0	675	29	6	294	1.39	332	1.6	305	1.42	480	1.51	444	1.99	476	1.69	600	1.32
5	mouth	1	2	alghe	0	506	24	5	669	0.62	657	0.73	422	1.93	269	0.6	641	1.48	121	0.54	225	1.34
5	hand	1	2	alveare	0	771	11	7	679	0.42	674	0.57	421	2.32	267	1.02	609	1.44	150	0.73	363	1.74
5	mouth	1	1	analogia	1		8	8	206	1.34	327	1.79	418	1.55	539	0.95	313	2.1	517	1.55	620	1.2
5	hand	1	2	canoa	0	614	25	5	679	0.59	688	0.33	440	2.13	335	1.18	600	1.14	114	0.36	288	1.57
5	mouth	1	2	circo	0	756	43	5	616	1.16	660	0.74	453	1.83	228	0.63	626	0.92	179	0.88	205	1
5	mouth	1	1	circostanza	0	670	70	11	273	1.7	228	1.49	412	1.73	479	1.23	331	2.09	485	1.31	642	0.61
5	hand	1	1	concetto	0	775	118	8	168	0.99	224	1.5	509	1.69	426	0.92	315	2.06	635	1.3	544	1.71
5	hand	1	3	conflitto	0	592	140	9	304	1.25	348	1.81	416	2.19	444	1.15	432	1.87	424	1.1	553	1.39
5	mouth	1	2	cravatta	0	901	38	8	694	0.24	688	0.44	552	1.87	250	0.93	675	0.58	105	0.22	200	1.2
5	hand	1	3	disperazione	0	583	101	12	311	1.55	428	1.74	505	1.61	389	1.35	501	1.86	459	1.43	427	1.96
5	hand	1	2	elefante	0	1003	36	8	669	0.6	695	0.23	482	1.77	210	0.79	618	1.45	100	0	296	1.9
5	mouth	1	3	emergenza	0	507	161	9	315	1.64	348	1.9	500	1.6	400	1.21	474	1.88	456	1.37	509	1.42
5	hand	1	2	falce	0	692	5	5	662	0.82	632	1.3	387	1.85	365	1.04	575	1.7	129	0.56	288	1.32
5	hand	1	3	fallimento	0	570	99	10	344	1.59	263	1.74	455	1.8	420	1.28	400	1.94	450	1.69	520	1.85
5	hand	1	1	fascino	0	990	149	7	246	1.56	430	1.33	495	1.75	475	1.18	476	1.83	535	1.28	550	1.44
5	hand	1	2	flotta	0	1051	35	6	600	1.2	644	0.75	442	1.71	330	0.95	582	1.66	163	0.72	375	1.9
5	mouth	1	3	fremito	1		11	7	335	1.79	312	1.84	273	1.33	516	1.26	304	2.03	390	1.95	600	1.44
5	mouth	1	1	funzione	0	553	185	8	273	1.33	274	1.97	414	1.34	420	1.64	341	1.89	465	1.86	592	1.5
5	hand	1	2	gallo	0	700	12	5	700	0	695	0.23	486	1.74	215	0.75	600	1.39	112	0.54	212	1.48
5	mouth	1	2	giraffa	0	468	1	7	681	0.49	674	0.69	463	2.39	181	0.54	644	1.42	106	0.24	306	1.78
5	mouth	1	3	giuramento	0	467	13	10	309	1.5	344	1.91	393	1.44	400	1.12	417	1.76	400	1.9	553	1.21
5	hand	1	3	impulso	0	700	50	7	300	1.63	300	1.89	437	1.92	452	1.28	338	1.84	506	1	463	1.56
5	mouth	1	1	indiscrezione	1		16	13	188	0.99	191	1.16	395	1.9	556	1.15	303	1.71	562	1.26	616	1.49
5	mouth	1	1	inefficienza	0	884	17	12	245	1.3	274	1.56	418	1.87	521	1.14	345	1.88	515	1.69	563	1.71
5	mouth	1	1	inesperienza	0	1302	5	12	232	1.19	220	1.42	427	1.83	458	1.32	355	1.77	550	1.48	556	1.54
5	hand	1	1	insufficienza	0	581	15	13	265	1.67	230	1.55	416	2.03	363	1.2	388	2.09	526	1.42	503	1.49
5	hand	1	3	ira	0	646	45	3	296	1.43	391	1.98	395	2.07	400	1.21	382	1.71	474	1.42	491	1.55
5	hand	1	1	logica	0	755	107	6	220	1.42	195	1.43	536	1.38	435	1.42	362	1.92	559	1.33	580	1.76
5	hand	1	1	merito	0	692	141	6	232	1.38	235	1.67	489	1.41	352	1.23	382	1.82	556	1.5	450	1.81
5	hand	1	2	minerale	0	638	9	8	627	0.88	538	1.46	447	1.71	396	1	505	2.09	174	1.08	388	1.26
5	hand	1	2	oca	0	1275	29	3	685	0.54	700	0	468	2.21	150	0.52	659	1.08	106	0.24	197	1.33
5	hand	1	3	orrore	0	808	77	6	305	1.29	356	1.74	491	1.78	400	1.38	475	1.8	450	1.71	363	1.71
5	mouth	1	1	ozio	1		9	4	268	1.43	384	1.91	445	1.99	450	1.33	494	1.69	480	1.79	568	0.95
5	mouth	1	2	palude	0	725	12	6	645	0.77	613	1.13	332	1.93	341	0.95	578	1.65	175	0.9	310	2.05
5	mouth	1	3	pericolo	0	704	250	8	323	1.5	361	1.85	511	1.85	231	0.7	506	1.77	394	1.37	397	1.51
5	hand	1	1	reputazione	0	941	27	11	215	1.01	213	1.39	411	1.76	569	0.95	282	1.85	594	1.2	619	1
5	hand	1	3	stupore	0	585	62	7	339	1.61	440	1.68	515	1.37	366	1.18	422	1.83	496	1.55	500	1.69
5	mouth	1	2	telegrafo	0	1022	3	9	614	1.46	556	1.44	321	1.75	438	1.28	455	2.35	153	1.24	531	1.25
5	mouth	1	1	tendenza	0	1077	161	8	169	0.87	184	1.12	455	1.9	530	1.69	294	1.76	591	1.4	604	1.06
5	mouth	1	3	terrore	0	575	96	7	297	1.38	408	1.87	421	1.93	326	1.08	488	1.71	455	1.7	463	2.11
5	mouth	1	2	torre	0	888	44	5	656	0.63	674	0.45	423	2.02	245	0.89	579	1.63	129	0.76	228	1.59
5	mouth	1	3	tradimento	0	856	73	10	363	1.2	300	1.83	464	2.05	415	1.18	485	1.88	418	1.49	432	2.04
5	mouth	1	2	trattore	0	527	2	8	685	0.44	672	0.74	482	2.11	209	0.75	669	0.6	105	0.22	216	1.68
5	hand	1	1	unanimità	0	1187	37	8	241	1.46	308	2.1	306	1.6	512	1.25	369	1.62	545	1.73	632	1.11
6	hand	1	3	abbandono	0	955	91	9	297	1.55	300	1.73	397	1.79	374	1.52	413	1.71	455	1.93	505	1.65
6	hand	1	1	affermazione	0	556	59	12	274	1.85	265	1.76	516	1.38	424	1.09	376	1.86	375	1.61	425	1.56
6	mouth	1	3	agitazione	0	662	25	10	413	1.5	311	1.56	541	1.75	320	1.44	497	1.82	441	1.54	364	2.04
6	mouth	1	3	agonia	0	673	29	6	294	1.39	332	1.6	305	1.42	480	1.51	444	1.99	476	1.69	600	1.32
6	mouth	1	2	alghe	0	691	24	5	669	0.62	657	0.73	422	1.93	269	0.6	641	1.48	121	0.54	225	1.34
6	hand	1	2	alveare	0	710	11	7	679	0.42	674	0.57	421	2.32	267	1.02	609	1.44	150	0.73	363	1.74
6	mouth	1	1	analogia	0	1123	8	8	206	1.34	327	1.79	418	1.55	539	0.95	313	2.1	517	1.55	620	1.2
6	hand	1	2	canoa	0	1268	25	5	679	0.59	688	0.33	440	2.13	335	1.18	600	1.14	114	0.36	288	1.57
6	mouth	1	2	circo	0	636	43	5	616	1.16	660	0.74	453	1.83	228	0.63	626	0.92	179	0.88	205	1
6	mouth	1	1	circostanza	0	787	70	11	273	1.7	228	1.49	412	1.73	479	1.23	331	2.09	485	1.31	642	0.61
6	hand	1	1	concetto	0	610	118	8	168	0.99	224	1.5	509	1.69	426	0.92	315	2.06	635	1.3	544	1.71
6	hand	1	3	conflitto	0	622	140	9	304	1.25	348	1.81	416	2.19	444	1.15	432	1.87	424	1.1	553	1.39
6	mouth	1	2	cravatta	0	790	38	8	694	0.24	688	0.44	552	1.87	250	0.93	675	0.58	105	0.22	200	1.2
6	hand	1	3	disperazione	0	581	101	12	311	1.55	428	1.74	505	1.61	389	1.35	501	1.86	459	1.43	427	1.96
6	hand	1	2	elefante	0	467	36	8	669	0.6	695	0.23	482	1.77	210	0.79	618	1.45	100	0	296	1.9
6	mouth	1	3	emergenza	0	697	161	9	315	1.64	348	1.9	500	1.6	400	1.21	474	1.88	456	1.37	509	1.42
6	hand	1	2	falce	0	555	5	5	662	0.82	632	1.3	387	1.85	365	1.04	575	1.7	129	0.56	288	1.32
6	hand	1	3	fallimento	0	532	99	10	344	1.59	263	1.74	455	1.8	420	1.28	400	1.94	450	1.69	520	1.85
6	hand	1	1	fascino	0	530	149	7	246	1.56	430	1.33	495	1.75	475	1.18	476	1.83	535	1.28	550	1.44
6	hand	1	2	flotta	0	748	35	6	600	1.2	644	0.75	442	1.71	330	0.95	582	1.66	163	0.72	375	1.9
6	mouth	1	3	fremito	0	883	11	7	335	1.79	312	1.84	273	1.33	516	1.26	304	2.03	390	1.95	600	1.44
6	mouth	1	1	funzione	0	821	185	8	273	1.33	274	1.97	414	1.34	420	1.64	341	1.89	465	1.86	592	1.5
6	hand	1	2	gallo	0	657	12	5	700	0	695	0.23	486	1.74	215	0.75	600	1.39	112	0.54	212	1.48
6	mouth	1	2	giraffa	0	729	1	7	681	0.49	674	0.69	463	2.39	181	0.54	644	1.42	106	0.24	306	1.78
6	mouth	1	3	giuramento	0	664	13	10	309	1.5	344	1.91	393	1.44	400	1.12	417	1.76	400	1.9	553	1.21
6	hand	1	3	impulso	0	598	50	7	300	1.63	300	1.89	437	1.92	452	1.28	338	1.84	506	1	463	1.56
6	mouth	1	1	indiscrezione	0	929	16	13	188	0.99	191	1.16	395	1.9	556	1.15	303	1.71	562	1.26	616	1.49
6	mouth	1	1	inefficienza	0	730	17	12	245	1.3	274	1.56	418	1.87	521	1.14	345	1.88	515	1.69	563	1.71
6	mouth	1	1	inesperienza	0	791	5	12	232	1.19	220	1.42	427	1.83	458	1.32	355	1.77	550	1.48	556	1.54
6	hand	1	1	insufficienza	0	589	15	13	265	1.67	230	1.55	416	2.03	363	1.2	388	2.09	526	1.42	503	1.49
6	hand	1	3	ira	0	612	45	3	296	1.43	391	1.98	395	2.07	400	1.21	382	1.71	474	1.42	491	1.55
6	hand	1	1	logica	0	611	107	6	220	1.42	195	1.43	536	1.38	435	1.42	362	1.92	559	1.33	580	1.76
6	hand	1	1	merito	0	748	141	6	232	1.38	235	1.67	489	1.41	352	1.23	382	1.82	556	1.5	450	1.81
6	hand	1	2	minerale	0	612	9	8	627	0.88	538	1.46	447	1.71	396	1	505	2.09	174	1.08	388	1.26
6	hand	1	2	oca	0	784	29	3	685	0.54	700	0	468	2.21	150	0.52	659	1.08	106	0.24	197	1.33
6	hand	1	3	orrore	0	692	77	6	305	1.29	356	1.74	491	1.78	400	1.38	475	1.8	450	1.71	363	1.71
6	mouth	1	1	ozio	0	676	9	4	268	1.43	384	1.91	445	1.99	450	1.33	494	1.69	480	1.79	568	0.95
6	mouth	1	2	palude	0	687	12	6	645	0.77	613	1.13	332	1.93	341	0.95	578	1.65	175	0.9	310	2.05
6	mouth	1	3	pericolo	0	779	250	8	323	1.5	361	1.85	511	1.85	231	0.7	506	1.77	394	1.37	397	1.51
6	hand	1	1	reputazione	0	685	27	11	215	1.01	213	1.39	411	1.76	569	0.95	282	1.85	594	1.2	619	1
6	hand	1	3	stupore	0	712	62	7	339	1.61	440	1.68	515	1.37	366	1.18	422	1.83	496	1.55	500	1.69
6	mouth	1	2	telegrafo	0	690	3	9	614	1.46	556	1.44	321	1.75	438	1.28	455	2.35	153	1.24	531	1.25
6	mouth	1	1	tendenza	0	715	161	8	169	0.87	184	1.12	455	1.9	530	1.69	294	1.76	591	1.4	604	1.06
6	mouth	1	3	terrore	0	700	96	7	297	1.38	408	1.87	421	1.93	326	1.08	488	1.71	455	1.7	463	2.11
6	mouth	1	2	torre	0	818	44	5	656	0.63	674	0.45	423	2.02	245	0.89	579	1.63	129	0.76	228	1.59
6	mouth	1	3	tradimento	0	656	73	10	363	1.2	300	1.83	464	2.05	415	1.18	485	1.88	418	1.49	432	2.04
6	mouth	1	2	trattore	0	596	2	8	685	0.44	672	0.74	482	2.11	209	0.75	669	0.6	105	0.22	216	1.68
6	hand	1	1	unanimità	0	806	37	8	241	1.46	308	2.1	306	1.6	512	1.25	369	1.62	545	1.73	632	1.11
7	mouth	1	3	abbandono	0	918	91	9	297	1.55	300	1.73	397	1.79	374	1.52	413	1.71	455	1.93	505	1.65
7	mouth	1	1	affermazione	0	1018	59	12	274	1.85	265	1.76	516	1.38	424	1.09	376	1.86	375	1.61	425	1.56
7	hand	1	3	agitazione	0	737	25	10	413	1.5	311	1.56	541	1.75	320	1.44	497	1.82	441	1.54	364	2.04
7	hand	1	3	agonia	0	843	29	6	294	1.39	332	1.6	305	1.42	480	1.51	444	1.99	476	1.69	600	1.32
7	hand	1	2	alghe	0	765	24	5	669	0.62	657	0.73	422	1.93	269	0.6	641	1.48	121	0.54	225	1.34
7	mouth	1	2	alveare	0	881	11	7	679	0.42	674	0.57	421	2.32	267	1.02	609	1.44	150	0.73	363	1.74
7	hand	1	1	analogia	0	704	8	8	206	1.34	327	1.79	418	1.55	539	0.95	313	2.1	517	1.55	620	1.2
7	mouth	1	2	canoa	0	774	25	5	679	0.59	688	0.33	440	2.13	335	1.18	600	1.14	114	0.36	288	1.57
7	hand	1	2	circo	0	728	43	5	616	1.16	660	0.74	453	1.83	228	0.63	626	0.92	179	0.88	205	1
7	hand	1	1	circostanza	0	713	70	11	273	1.7	228	1.49	412	1.73	479	1.23	331	2.09	485	1.31	642	0.61
7	mouth	1	1	concetto	0	863	118	8	168	0.99	224	1.5	509	1.69	426	0.92	315	2.06	635	1.3	544	1.71
7	mouth	1	3	conflitto	0	782	140	9	304	1.25	348	1.81	416	2.19	444	1.15	432	1.87	424	1.1	553	1.39
7	hand	1	2	cravatta	0	758	38	8	694	0.24	688	0.44	552	1.87	250	0.93	675	0.58	105	0.22	200	1.2
7	mouth	1	3	disperazione	0	689	101	12	311	1.55	428	1.74	505	1.61	389	1.35	501	1.86	459	1.43	427	1.96
7	mouth	1	2	elefante	0	814	36	8	669	0.6	695	0.23	482	1.77	210	0.79	618	1.45	100	0	296	1.9
7	hand	1	3	emergenza	0	681	161	9	315	1.64	348	1.9	500	1.6	400	1.21	474	1.88	456	1.37	509	1.42
7	mouth	1	2	falce	0	656	5	5	662	0.82	632	1.3	387	1.85	365	1.04	575	1.7	129	0.56	288	1.32
7	mouth	1	3	fallimento	0	798	99	10	344	1.59	263	1.74	455	1.8	420	1.28	400	1.94	450	1.69	520	1.85
7	mouth	1	1	fascino	0	1001	149	7	246	1.56	430	1.33	495	1.75	475	1.18	476	1.83	535	1.28	550	1.44
7	mouth	1	2	flotta	0	955	35	6	600	1.2	644	0.75	442	1.71	330	0.95	582	1.66	163	0.72	375	1.9
7	hand	1	3	fremito	0	642	11	7	335	1.79	312	1.84	273	1.33	516	1.26	304	2.03	390	1.95	600	1.44
7	hand	1	1	funzione	0	811	185	8	273	1.33	274	1.97	414	1.34	420	1.64	341	1.89	465	1.86	592	1.5
7	mouth	1	2	gallo	0	1022	12	5	700	0	695	0.23	486	1.74	215	0.75	600	1.39	112	0.54	212	1.48
7	hand	1	2	giraffa	0	731	1	7	681	0.49	674	0.69	463	2.39	181	0.54	644	1.42	106	0.24	306	1.78
7	hand	1	3	giuramento	0	835	13	10	309	1.5	344	1.91	393	1.44	400	1.12	417	1.76	400	1.9	553	1.21
7	mouth	1	3	impulso	0	620	50	7	300	1.63	300	1.89	437	1.92	452	1.28	338	1.84	506	1	463	1.56
7	hand	1	1	indiscrezione	0	940	16	13	188	0.99	191	1.16	395	1.9	556	1.15	303	1.71	562	1.26	616	1.49
7	hand	1	1	inefficienza	0	890	17	12	245	1.3	274	1.56	418	1.87	521	1.14	345	1.88	515	1.69	563	1.71
7	hand	1	1	inesperienza	0	758	5	12	232	1.19	220	1.42	427	1.83	458	1.32	355	1.77	550	1.48	556	1.54
7	mouth	1	1	insufficienza	0	1307	15	13	265	1.67	230	1.55	416	2.03	363	1.2	388	2.09	526	1.42	503	1.49
7	mouth	1	3	ira	0	682	45	3	296	1.43	391	1.98	395	2.07	400	1.21	382	1.71	474	1.42	491	1.55
7	mouth	1	1	logica	0	724	107	6	220	1.42	195	1.43	536	1.38	435	1.42	362	1.92	559	1.33	580	1.76
7	mouth	1	1	merito	0	688	141	6	232	1.38	235	1.67	489	1.41	352	1.23	382	1.82	556	1.5	450	1.81
7	mouth	1	2	minerale	0	635	9	8	627	0.88	538	1.46	447	1.71	396	1	505	2.09	174	1.08	388	1.26
7	mouth	1	2	oca	0	921	29	3	685	0.54	700	0	468	2.21	150	0.52	659	1.08	106	0.24	197	1.33
7	mouth	1	3	orrore	0	631	77	6	305	1.29	356	1.74	491	1.78	400	1.38	475	1.8	450	1.71	363	1.71
7	hand	1	1	ozio	0	709	9	4	268	1.43	384	1.91	445	1.99	450	1.33	494	1.69	480	1.79	568	0.95
7	hand	1	2	palude	0	671	12	6	645	0.77	613	1.13	332	1.93	341	0.95	578	1.65	175	0.9	310	2.05
7	hand	1	3	pericolo	0	765	250	8	323	1.5	361	1.85	511	1.85	231	0.7	506	1.77	394	1.37	397	1.51
7	mouth	1	1	reputazione	0	1188	27	11	215	1.01	213	1.39	411	1.76	569	0.95	282	1.85	594	1.2	619	1
7	mouth	1	3	stupore	0	738	62	7	339	1.61	440	1.68	515	1.37	366	1.18	422	1.83	496	1.55	500	1.69
7	hand	1	2	telegrafo	0	748	3	9	614	1.46	556	1.44	321	1.75	438	1.28	455	2.35	153	1.24	531	1.25
7	hand	1	1	tendenza	0	873	161	8	169	0.87	184	1.12	455	1.9	530	1.69	294	1.76	591	1.4	604	1.06
7	hand	1	3	terrore	0	812	96	7	297	1.38	408	1.87	421	1.93	326	1.08	488	1.71	455	1.7	463	2.11
7	hand	1	2	torre	0	697	44	5	656	0.63	674	0.45	423	2.02	245	0.89	579	1.63	129	0.76	228	1.59
7	hand	1	3	tradimento	0	624	73	10	363	1.2	300	1.83	464	2.05	415	1.18	485	1.88	418	1.49	432	2.04
7	hand	1	2	trattore	0	804	2	8	685	0.44	672	0.74	482	2.11	209	0.75	669	0.6	105	0.22	216	1.68
7	mouth	1	1	unanimità	0	1222	37	8	241	1.46	308	2.1	306	1.6	512	1.25	369	1.62	545	1.73	632	1.11
8	mouth	1	3	abbandono	0	1049	91	9	297	1.55	300	1.73	397	1.79	374	1.52	413	1.71	455	1.93	505	1.65
8	mouth	1	1	affermazione	0	663	59	12	274	1.85	265	1.76	516	1.38	424	1.09	376	1.86	375	1.61	425	1.56
8	hand	1	3	agitazione	0	946	25	10	413	1.5	311	1.56	541	1.75	320	1.44	497	1.82	441	1.54	364	2.04
8	hand	1	3	agonia	0	825	29	6	294	1.39	332	1.6	305	1.42	480	1.51	444	1.99	476	1.69	600	1.32
8	hand	1	2	alghe	0	778	24	5	669	0.62	657	0.73	422	1.93	269	0.6	641	1.48	121	0.54	225	1.34
8	mouth	1	2	alveare	0	827	11	7	679	0.42	674	0.57	421	2.32	267	1.02	609	1.44	150	0.73	363	1.74
8	hand	1	1	analogia	0	970	8	8	206	1.34	327	1.79	418	1.55	539	0.95	313	2.1	517	1.55	620	1.2
8	mouth	1	2	canoa	0	784	25	5	679	0.59	688	0.33	440	2.13	335	1.18	600	1.14	114	0.36	288	1.57
8	hand	1	2	circo	1		43	5	616	1.16	660	0.74	453	1.83	228	0.63	626	0.92	179	0.88	205	1
8	hand	1	1	circostanza	0	735	70	11	273	1.7	228	1.49	412	1.73	479	1.23	331	2.09	485	1.31	642	0.61
8	mouth	1	1	concetto	0	877	118	8	168	0.99	224	1.5	509	1.69	426	0.92	315	2.06	635	1.3	544	1.71
8	mouth	1	3	conflitto	0	795	140	9	304	1.25	348	1.81	416	2.19	444	1.15	432	1.87	424	1.1	553	1.39
8	hand	1	2	cravatta	0	857	38	8	694	0.24	688	0.44	552	1.87	250	0.93	675	0.58	105	0.22	200	1.2
8	mouth	1	3	disperazione	0	627	101	12	311	1.55	428	1.74	505	1.61	389	1.35	501	1.86	459	1.43	427	1.96
8	mouth	1	2	elefante	0	1475	36	8	669	0.6	695	0.23	482	1.77	210	0.79	618	1.45	100	0	296	1.9
8	hand	1	3	emergenza	0	886	161	9	315	1.64	348	1.9	500	1.6	400	1.21	474	1.88	456	1.37	509	1.42
8	mouth	1	2	falce	0	951	5	5	662	0.82	632	1.3	387	1.85	365	1.04	575	1.7	129	0.56	288	1.32
8	mouth	1	3	fallimento	0	770	99	10	344	1.59	263	1.74	455	1.8	420	1.28	400	1.94	450	1.69	520	1.85
8	mouth	1	1	fascino	0	742	149	7	246	1.56	430	1.33	495	1.75	475	1.18	476	1.83	535	1.28	550	1.44
8	mouth	1	2	flotta	1		35	6	600	1.2	644	0.75	442	1.71	330	0.95	582	1.66	163	0.72	375	1.9
8	hand	1	3	fremito	0	1096	11	7	335	1.79	312	1.84	273	1.33	516	1.26	304	2.03	390	1.95	600	1.44
8	hand	1	1	funzione	0	879	185	8	273	1.33	274	1.97	414	1.34	420	1.64	341	1.89	465	1.86	592	1.5
8	mouth	1	2	gallo	0	840	12	5	700	0	695	0.23	486	1.74	215	0.75	600	1.39	112	0.54	212	1.48
8	hand	1	2	giraffa	0	752	1	7	681	0.49	674	0.69	463	2.39	181	0.54	644	1.42	106	0.24	306	1.78
8	hand	1	3	giuramento	0	742	13	10	309	1.5	344	1.91	393	1.44	400	1.12	417	1.76	400	1.9	553	1.21
8	mouth	1	3	impulso	0	967	50	7	300	1.63	300	1.89	437	1.92	452	1.28	338	1.84	506	1	463	1.56
8	hand	1	1	indiscrezione	0	879	16	13	188	0.99	191	1.16	395	1.9	556	1.15	303	1.71	562	1.26	616	1.49
8	hand	1	1	inefficienza	0	1449	17	12	245	1.3	274	1.56	418	1.87	521	1.14	345	1.88	515	1.69	563	1.71
8	hand	1	1	inesperienza	0	858	5	12	232	1.19	220	1.42	427	1.83	458	1.32	355	1.77	550	1.48	556	1.54
8	mouth	1	1	insufficienza	0	867	15	13	265	1.67	230	1.55	416	2.03	363	1.2	388	2.09	526	1.42	503	1.49
8	mouth	1	3	ira	0	666	45	3	296	1.43	391	1.98	395	2.07	400	1.21	382	1.71	474	1.42	491	1.55
8	mouth	1	1	logica	0	882	107	6	220	1.42	195	1.43	536	1.38	435	1.42	362	1.92	559	1.33	580	1.76
8	mouth	1	1	merito	0	894	141	6	232	1.38	235	1.67	489	1.41	352	1.23	382	1.82	556	1.5	450	1.81
8	mouth	1	2	minerale	0	910	9	8	627	0.88	538	1.46	447	1.71	396	1	505	2.09	174	1.08	388	1.26
8	mouth	1	2	oca	0	925	29	3	685	0.54	700	0	468	2.21	150	0.52	659	1.08	106	0.24	197	1.33
8	mouth	1	3	orrore	0	816	77	6	305	1.29	356	1.74	491	1.78	400	1.38	475	1.8	450	1.71	363	1.71
8	hand	1	1	ozio	0	815	9	4	268	1.43	384	1.91	445	1.99	450	1.33	494	1.69	480	1.79	568	0.95
8	hand	1	2	palude	0	851	12	6	645	0.77	613	1.13	332	1.93	341	0.95	578	1.65	175	0.9	310	2.05
8	hand	1	3	pericolo	0	962	250	8	323	1.5	361	1.85	511	1.85	231	0.7	506	1.77	394	1.37	397	1.51
8	mouth	1	1	reputazione	1		27	11	215	1.01	213	1.39	411	1.76	569	0.95	282	1.85	594	1.2	619	1
8	mouth	1	3	stupore	0	644	62	7	339	1.61	440	1.68	515	1.37	366	1.18	422	1.83	496	1.55	500	1.69
8	hand	1	2	telegrafo	0	776	3	9	614	1.46	556	1.44	321	1.75	438	1.28	455	2.35	153	1.24	531	1.25
8	hand	1	1	tendenza	0	720	161	8	169	0.87	184	1.12	455	1.9	530	1.69	294	1.76	591	1.4	604	1.06
8	hand	1	3	terrore	0	792	96	7	297	1.38	408	1.87	421	1.93	326	1.08	488	1.71	455	1.7	463	2.11
8	hand	1	2	torre	0	666	44	5	656	0.63	674	0.45	423	2.02	245	0.89	579	1.63	129	0.76	228	1.59
8	hand	1	3	tradimento	0	784	73	10	363	1.2	300	1.83	464	2.05	415	1.18	485	1.88	418	1.49	432	2.04
8	hand	1	2	trattore	0	717	2	8	685	0.44	672	0.74	482	2.11	209	0.75	669	0.6	105	0.22	216	1.68
8	mouth	1	1	unanimità	1		37	8	241	1.46	308	2.1	306	1.6	512	1.25	369	1.62	545	1.73	632	1.11
9	mouth	1	3	abbandono	0	849	91	9	297	1.55	300	1.73	397	1.79	374	1.52	413	1.71	455	1.93	505	1.65
9	mouth	1	1	affermazione	0	1112	59	12	274	1.85	265	1.76	516	1.38	424	1.09	376	1.86	375	1.61	425	1.56
9	hand	1	3	agitazione	0	1350	25	10	413	1.5	311	1.56	541	1.75	320	1.44	497	1.82	441	1.54	364	2.04
9	hand	1	3	agonia	0	1022	29	6	294	1.39	332	1.6	305	1.42	480	1.51	444	1.99	476	1.69	600	1.32
9	hand	1	2	alghe	0	1079	24	5	669	0.62	657	0.73	422	1.93	269	0.6	641	1.48	121	0.54	225	1.34
9	mouth	1	2	alveare	0	959	11	7	679	0.42	674	0.57	421	2.32	267	1.02	609	1.44	150	0.73	363	1.74
9	hand	1	1	analogia	0	960	8	8	206	1.34	327	1.79	418	1.55	539	0.95	313	2.1	517	1.55	620	1.2
9	mouth	1	2	canoa	0	1091	25	5	679	0.59	688	0.33	440	2.13	335	1.18	600	1.14	114	0.36	288	1.57
9	hand	1	2	circo	0	1082	43	5	616	1.16	660	0.74	453	1.83	228	0.63	626	0.92	179	0.88	205	1
9	hand	1	1	circostanza	0	1160	70	11	273	1.7	228	1.49	412	1.73	479	1.23	331	2.09	485	1.31	642	0.61
9	mouth	1	1	concetto	0	1079	118	8	168	0.99	224	1.5	509	1.69	426	0.92	315	2.06	635	1.3	544	1.71
9	mouth	1	3	conflitto	0	1197	140	9	304	1.25	348	1.81	416	2.19	444	1.15	432	1.87	424	1.1	553	1.39
9	hand	1	2	cravatta	0	896	38	8	694	0.24	688	0.44	552	1.87	250	0.93	675	0.58	105	0.22	200	1.2
9	mouth	1	3	disperazione	0	1003	101	12	311	1.55	428	1.74	505	1.61	389	1.35	501	1.86	459	1.43	427	1.96
9	mouth	1	2	elefante	0	769	36	8	669	0.6	695	0.23	482	1.77	210	0.79	618	1.45	100	0	296	1.9
9	hand	1	3	emergenza	1		161	9	315	1.64	348	1.9	500	1.6	400	1.21	474	1.88	456	1.37	509	1.42
9	mouth	1	2	falce	0	904	5	5	662	0.82	632	1.3	387	1.85	365	1.04	575	1.7	129	0.56	288	1.32
9	mouth	1	3	fallimento	0	847	99	10	344	1.59	263	1.74	455	1.8	420	1.28	400	1.94	450	1.69	520	1.85
9	mouth	1	1	fascino	0	1183	149	7	246	1.56	430	1.33	495	1.75	475	1.18	476	1.83	535	1.28	550	1.44
9	mouth	1	2	flotta	0	1131	35	6	600	1.2	644	0.75	442	1.71	330	0.95	582	1.66	163	0.72	375	1.9
9	hand	1	3	fremito	1		11	7	335	1.79	312	1.84	273	1.33	516	1.26	304	2.03	390	1.95	600	1.44
9	hand	1	1	funzione	0	1282	185	8	273	1.33	274	1.97	414	1.34	420	1.64	341	1.89	465	1.86	592	1.5
9	mouth	1	2	gallo	0	815	12	5	700	0	695	0.23	486	1.74	215	0.75	600	1.39	112	0.54	212	1.48
9	hand	1	2	giraffa	0	1087	1	7	681	0.49	674	0.69	463	2.39	181	0.54	644	1.42	106	0.24	306	1.78
9	hand	1	3	giuramento	0	1122	13	10	309	1.5	344	1.91	393	1.44	400	1.12	417	1.76	400	1.9	553	1.21
9	mouth	1	3	impulso	0	962	50	7	300	1.63	300	1.89	437	1.92	452	1.28	338	1.84	506	1	463	1.56
9	hand	1	1	indiscrezione	1		16	13	188	0.99	191	1.16	395	1.9	556	1.15	303	1.71	562	1.26	616	1.49
9	hand	1	1	inefficienza	0	1201	17	12	245	1.3	274	1.56	418	1.87	521	1.14	345	1.88	515	1.69	563	1.71
9	hand	1	1	inesperienza	0	1162	5	12	232	1.19	220	1.42	427	1.83	458	1.32	355	1.77	550	1.48	556	1.54
9	mouth	1	1	insufficienza	0	1424	15	13	265	1.67	230	1.55	416	2.03	363	1.2	388	2.09	526	1.42	503	1.49
9	mouth	1	3	ira	0	1037	45	3	296	1.43	391	1.98	395	2.07	400	1.21	382	1.71	474	1.42	491	1.55
9	mouth	1	1	logica	0	1005	107	6	220	1.42	195	1.43	536	1.38	435	1.42	362	1.92	559	1.33	580	1.76
9	mouth	1	1	merito	0	995	141	6	232	1.38	235	1.67	489	1.41	352	1.23	382	1.82	556	1.5	450	1.81
9	mouth	1	2	minerale	0	1028	9	8	627	0.88	538	1.46	447	1.71	396	1	505	2.09	174	1.08	388	1.26
9	mouth	1	2	oca	0	783	29	3	685	0.54	700	0	468	2.21	150	0.52	659	1.08	106	0.24	197	1.33
9	mouth	1	3	orrore	0	909	77	6	305	1.29	356	1.74	491	1.78	400	1.38	475	1.8	450	1.71	363	1.71
9	hand	1	1	ozio	0	1260	9	4	268	1.43	384	1.91	445	1.99	450	1.33	494	1.69	480	1.79	568	0.95
9	hand	1	2	palude	0	889	12	6	645	0.77	613	1.13	332	1.93	341	0.95	578	1.65	175	0.9	310	2.05
9	hand	1	3	pericolo	0	837	250	8	323	1.5	361	1.85	511	1.85	231	0.7	506	1.77	394	1.37	397	1.51
9	mouth	1	1	reputazione	0	1082	27	11	215	1.01	213	1.39	411	1.76	569	0.95	282	1.85	594	1.2	619	1
9	mouth	1	3	stupore	0	748	62	7	339	1.61	440	1.68	515	1.37	366	1.18	422	1.83	496	1.55	500	1.69
9	hand	1	2	telegrafo	0	783	3	9	614	1.46	556	1.44	321	1.75	438	1.28	455	2.35	153	1.24	531	1.25
9	hand	1	1	tendenza	0	1032	161	8	169	0.87	184	1.12	455	1.9	530	1.69	294	1.76	591	1.4	604	1.06
9	hand	1	3	terrore	0	851	96	7	297	1.38	408	1.87	421	1.93	326	1.08	488	1.71	455	1.7	463	2.11
9	hand	1	2	torre	0	837	44	5	656	0.63	674	0.45	423	2.02	245	0.89	579	1.63	129	0.76	228	1.59
9	hand	1	3	tradimento	0	821	73	10	363	1.2	300	1.83	464	2.05	415	1.18	485	1.88	418	1.49	432	2.04
9	hand	1	2	trattore	0	825	2	8	685	0.44	672	0.74	482	2.11	209	0.75	669	0.6	105	0.22	216	1.68
9	mouth	1	1	unanimità	0	1128	37	8	241	1.46	308	2.1	306	1.6	512	1.25	369	1.62	545	1.73	632	1.11
10	mouth	1	3	abbandono	0	1334	91	9	297	1.55	300	1.73	397	1.79	374	1.52	413	1.71	455	1.93	505	1.65
10	mouth	1	1	affermazione	0	1094	59	12	274	1.85	265	1.76	516	1.38	424	1.09	376	1.86	375	1.61	425	1.56
10	hand	1	3	agitazione	0	759	25	10	413	1.5	311	1.56	541	1.75	320	1.44	497	1.82	441	1.54	364	2.04
10	hand	1	3	agonia	0	843	29	6	294	1.39	332	1.6	305	1.42	480	1.51	444	1.99	476	1.69	600	1.32
10	hand	1	2	alghe	0	755	24	5	669	0.62	657	0.73	422	1.93	269	0.6	641	1.48	121	0.54	225	1.34
10	mouth	1	2	alveare	0	1258	11	7	679	0.42	674	0.57	421	2.32	267	1.02	609	1.44	150	0.73	363	1.74
10	hand	1	1	analogia	0	767	8	8	206	1.34	327	1.79	418	1.55	539	0.95	313	2.1	517	1.55	620	1.2
10	mouth	1	2	canoa	1		25	5	679	0.59	688	0.33	440	2.13	335	1.18	600	1.14	114	0.36	288	1.57
10	hand	1	2	circo	0	851	43	5	616	1.16	660	0.74	453	1.83	228	0.63	626	0.92	179	0.88	205	1
10	hand	1	1	circostanza	0	954	70	11	273	1.7	228	1.49	412	1.73	479	1.23	331	2.09	485	1.31	642	0.61
10	mouth	1	1	concetto	0	938	118	8	168	0.99	224	1.5	509	1.69	426	0.92	315	2.06	635	1.3	544	1.71
10	mouth	1	3	conflitto	0	742	140	9	304	1.25	348	1.81	416	2.19	444	1.15	432	1.87	424	1.1	553	1.39
10	hand	1	2	cravatta	0	1210	38	8	694	0.24	688	0.44	552	1.87	250	0.93	675	0.58	105	0.22	200	1.2
10	mouth	1	3	disperazione	0	1107	101	12	311	1.55	428	1.74	505	1.61	389	1.35	501	1.86	459	1.43	427	1.96
10	mouth	1	2	elefante	0	844	36	8	669	0.6	695	0.23	482	1.77	210	0.79	618	1.45	100	0	296	1.9
10	hand	1	3	emergenza	0	908	161	9	315	1.64	348	1.9	500	1.6	400	1.21	474	1.88	456	1.37	509	1.42
10	mouth	1	2	falce	0	1229	5	5	662	0.82	632	1.3	387	1.85	365	1.04	575	1.7	129	0.56	288	1.32
10	mouth	1	3	fallimento	0	800	99	10	344	1.59	263	1.74	455	1.8	420	1.28	400	1.94	450	1.69	520	1.85
10	mouth	1	1	fascino	0	983	149	7	246	1.56	430	1.33	495	1.75	475	1.18	476	1.83	535	1.28	550	1.44
10	mouth	1	2	flotta	0	719	35	6	600	1.2	644	0.75	442	1.71	330	0.95	582	1.66	163	0.72	375	1.9
10	hand	1	3	fremito	0	1138	11	7	335	1.79	312	1.84	273	1.33	516	1.26	304	2.03	390	1.95	600	1.44
10	hand	1	1	funzione	0	758	185	8	273	1.33	274	1.97	414	1.34	420	1.64	341	1.89	465	1.86	592	1.5
10	mouth	1	2	gallo	0	1112	12	5	700	0	695	0.23	486	1.74	215	0.75	600	1.39	112	0.54	212	1.48
10	hand	1	2	giraffa	0	725	1	7	681	0.49	674	0.69	463	2.39	181	0.54	644	1.42	106	0.24	306	1.78
10	hand	1	3	giuramento	0	862	13	10	309	1.5	344	1.91	393	1.44	400	1.12	417	1.76	400	1.9	553	1.21
10	mouth	1	3	impulso	0	1446	50	7	300	1.63	300	1.89	437	1.92	452	1.28	338	1.84	506	1	463	1.56
10	hand	1	1	indiscrezione	0	1037	16	13	188	0.99	191	1.16	395	1.9	556	1.15	303	1.71	562	1.26	616	1.49
10	hand	1	1	inefficienza	0	1130	17	12	245	1.3	274	1.56	418	1.87	521	1.14	345	1.88	515	1.69	563	1.71
10	hand	1	1	inesperienza	0	1449	5	12	232	1.19	220	1.42	427	1.83	458	1.32	355	1.77	550	1.48	556	1.54
10	mouth	1	1	insufficienza	1		15	13	265	1.67	230	1.55	416	2.03	363	1.2	388	2.09	526	1.42	503	1.49
10	mouth	1	3	ira	0	976	45	3	296	1.43	391	1.98	395	2.07	400	1.21	382	1.71	474	1.42	491	1.55
10	mouth	1	1	logica	0	864	107	6	220	1.42	195	1.43	536	1.38	435	1.42	362	1.92	559	1.33	580	1.76
10	mouth	1	1	merito	0	851	141	6	232	1.38	235	1.67	489	1.41	352	1.23	382	1.82	556	1.5	450	1.81
10	mouth	1	2	minerale	0	1191	9	8	627	0.88	538	1.46	447	1.71	396	1	505	2.09	174	1.08	388	1.26
10	mouth	1	2	oca	0	769	29	3	685	0.54	700	0	468	2.21	150	0.52	659	1.08	106	0.24	197	1.33
10	mouth	1	3	orrore	0	1252	77	6	305	1.29	356	1.74	491	1.78	400	1.38	475	1.8	450	1.71	363	1.71
10	hand	1	1	ozio	0	897	9	4	268	1.43	384	1.91	445	1.99	450	1.33	494	1.69	480	1.79	568	0.95
10	hand	1	2	palude	0	818	12	6	645	0.77	613	1.13	332	1.93	341	0.95	578	1.65	175	0.9	310	2.05
10	hand	1	3	pericolo	0	776	250	8	323	1.5	361	1.85	511	1.85	231	0.7	506	1.77	394	1.37	397	1.51
10	mouth	1	1	reputazione	0	1289	27	11	215	1.01	213	1.39	411	1.76	569	0.95	282	1.85	594	1.2	619	1
10	mouth	1	3	stupore	0	848	62	7	339	1.61	440	1.68	515	1.37	366	1.18	422	1.83	496	1.55	500	1.69
10	hand	1	2	telegrafo	0	899	3	9	614	1.46	556	1.44	321	1.75	438	1.28	455	2.35	153	1.24	531	1.25
10	hand	1	1	tendenza	0	838	161	8	169	0.87	184	1.12	455	1.9	530	1.69	294	1.76	591	1.4	604	1.06
10	hand	1	3	terrore	0	777	96	7	297	1.38	408	1.87	421	1.93	326	1.08	488	1.71	455	1.7	463	2.11
10	hand	1	2	torre	0	832	44	5	656	0.63	674	0.45	423	2.02	245	0.89	579	1.63	129	0.76	228	1.59
10	hand	1	3	tradimento	0	821	73	10	363	1.2	300	1.83	464	2.05	415	1.18	485	1.88	418	1.49	432	2.04
10	hand	1	2	trattore	0	684	2	8	685	0.44	672	0.74	482	2.11	209	0.75	669	0.6	105	0.22	216	1.68
10	mouth	1	1	unanimità	0	885	37	8	241	1.46	308	2.1	306	1.6	512	1.25	369	1.62	545	1.73	632	1.11
11	hand	1	3	abbandono	0	927	91	9	297	1.55	300	1.73	397	1.79	374	1.52	413	1.71	455	1.93	505	1.65
11	hand	1	1	affermazione	0	1022	59	12	274	1.85	265	1.76	516	1.38	424	1.09	376	1.86	375	1.61	425	1.56
11	mouth	1	3	agitazione	0	932	25	10	413	1.5	311	1.56	541	1.75	320	1.44	497	1.82	441	1.54	364	2.04
11	mouth	1	3	agonia	0	959	29	6	294	1.39	332	1.6	305	1.42	480	1.51	444	1.99	476	1.69	600	1.32
11	mouth	1	2	alghe	0	1165	24	5	669	0.62	657	0.73	422	1.93	269	0.6	641	1.48	121	0.54	225	1.34
11	hand	1	2	alveare	0	994	11	7	679	0.42	674	0.57	421	2.32	267	1.02	609	1.44	150	0.73	363	1.74
11	mouth	1	1	analogia	0	834	8	8	206	1.34	327	1.79	418	1.55	539	0.95	313	2.1	517	1.55	620	1.2
11	hand	1	2	canoa	0	739	25	5	679	0.59	688	0.33	440	2.13	335	1.18	600	1.14	114	0.36	288	1.57
11	mouth	1	2	circo	0	749	43	5	616	1.16	660	0.74	453	1.83	228	0.63	626	0.92	179	0.88	205	1
11	mouth	1	1	circostanza	0	821	70	11	273	1.7	228	1.49	412	1.73	479	1.23	331	2.09	485	1.31	642	0.61
11	hand	1	1	concetto	0	785	118	8	168	0.99	224	1.5	509	1.69	426	0.92	315	2.06	635	1.3	544	1.71
11	hand	1	3	conflitto	0	801	140	9	304	1.25	348	1.81	416	2.19	444	1.15	432	1.87	424	1.1	553	1.39
11	mouth	1	2	cravatta	0	1116	38	8	694	0.24	688	0.44	552	1.87	250	0.93	675	0.58	105	0.22	200	1.2
11	hand	1	3	disperazione	0	1099	101	12	311	1.55	428	1.74	505	1.61	389	1.35	501	1.86	459	1.43	427	1.96
11	hand	1	2	elefante	0	760	36	8	669	0.6	695	0.23	482	1.77	210	0.79	618	1.45	100	0	296	1.9
11	mouth	1	3	emergenza	0	844	161	9	315	1.64	348	1.9	500	1.6	400	1.21	474	1.88	456	1.37	509	1.42
11	hand	1	2	falce	0	1158	5	5	662	0.82	632	1.3	387	1.85	365	1.04	575	1.7	129	0.56	288	1.32
11	hand	1	3	fallimento	0	778	99	10	344	1.59	263	1.74	455	1.8	420	1.28	400	1.94	450	1.69	520	1.85
11	hand	1	1	fascino	0	697	149	7	246	1.56	430	1.33	495	1.75	475	1.18	476	1.83	535	1.28	550	1.44
11	hand	1	2	flotta	0	1043	35	6	600	1.2	644	0.75	442	1.71	330	0.95	582	1.66	163	0.72	375	1.9
11	mouth	1	3	fremito	0	1430	11	7	335	1.79	312	1.84	273	1.33	516	1.26	304	2.03	390	1.95	600	1.44
11	mouth	1	1	funzione	0	841	185	8	273	1.33	274	1.97	414	1.34	420	1.64	341	1.89	465	1.86	592	1.5
11	hand	1	2	gallo	0	868	12	5	700	0	695	0.23	486	1.74	215	0.75	600	1.39	112	0.54	212	1.48
11	mouth	1	2	giraffa	0	784	1	7	681	0.49	674	0.69	463	2.39	181	0.54	644	1.42	106	0.24	306	1.78
11	mouth	1	3	giuramento	0	881	13	10	309	1.5	344	1.91	393	1.44	400	1.12	417	1.76	400	1.9	553	1.21
11	hand	1	3	impulso	0	705	50	7	300	1.63	300	1.89	437	1.92	452	1.28	338	1.84	506	1	463	1.56
11	mouth	1	1	indiscrezione	0	1154	16	13	188	0.99	191	1.16	395	1.9	556	1.15	303	1.71	562	1.26	616	1.49
11	mouth	1	1	inefficienza	0	1468	17	12	245	1.3	274	1.56	418	1.87	521	1.14	345	1.88	515	1.69	563	1.71
11	mouth	1	1	inesperienza	0	954	5	12	232	1.19	220	1.42	427	1.83	458	1.32	355	1.77	550	1.48	556	1.54
11	hand	1	1	insufficienza	0	1398	15	13	265	1.67	230	1.55	416	2.03	363	1.2	388	2.09	526	1.42	503	1.49
11	hand	1	3	ira	0	766	45	3	296	1.43	391	1.98	395	2.07	400	1.21	382	1.71	474	1.42	491	1.55
11	hand	1	1	logica	0	665	107	6	220	1.42	195	1.43	536	1.38	435	1.42	362	1.92	559	1.33	580	1.76
11	hand	1	1	merito	0	855	141	6	232	1.38	235	1.67	489	1.41	352	1.23	382	1.82	556	1.5	450	1.81
11	hand	1	2	minerale	0	1231	9	8	627	0.88	538	1.46	447	1.71	396	1	505	2.09	174	1.08	388	1.26
11	hand	1	2	oca	0	762	29	3	685	0.54	700	0	468	2.21	150	0.52	659	1.08	106	0.24	197	1.33
11	hand	1	3	orrore	0	839	77	6	305	1.29	356	1.74	491	1.78	400	1.38	475	1.8	450	1.71	363	1.71
11	mouth	1	1	ozio	0	881	9	4	268	1.43	384	1.91	445	1.99	450	1.33	494	1.69	480	1.79	568	0.95
11	mouth	1	2	palude	0	1188	12	6	645	0.77	613	1.13	332	1.93	341	0.95	578	1.65	175	0.9	310	2.05
11	mouth	1	3	pericolo	0	838	250	8	323	1.5	361	1.85	511	1.85	231	0.7	506	1.77	394	1.37	397	1.51
11	hand	1	1	reputazione	0	1200	27	11	215	1.01	213	1.39	411	1.76	569	0.95	282	1.85	594	1.2	619	1
11	hand	1	3	stupore	0	710	62	7	339	1.61	440	1.68	515	1.37	366	1.18	422	1.83	496	1.55	500	1.69
11	mouth	1	2	telegrafo	0	914	3	9	614	1.46	556	1.44	321	1.75	438	1.28	455	2.35	153	1.24	531	1.25
11	mouth	1	1	tendenza	0	928	161	8	169	0.87	184	1.12	455	1.9	530	1.69	294	1.76	591	1.4	604	1.06
11	mouth	1	3	terrore	0	794	96	7	297	1.38	408	1.87	421	1.93	326	1.08	488	1.71	455	1.7	463	2.11
11	mouth	1	2	torre	0	938	44	5	656	0.63	674	0.45	423	2.02	245	0.89	579	1.63	129	0.76	228	1.59
11	mouth	1	3	tradimento	0	839	73	10	363	1.2	300	1.83	464	2.05	415	1.18	485	1.88	418	1.49	432	2.04
11	mouth	1	2	trattore	0	810	2	8	685	0.44	672	0.74	482	2.11	209	0.75	669	0.6	105	0.22	216	1.68
11	hand	1	1	unanimità	0	1037	37	8	241	1.46	308	2.1	306	1.6	512	1.25	369	1.62	545	1.73	632	1.11
12	hand	1	3	abbandono	0	864	91	9	297	1.55	300	1.73	397	1.79	374	1.52	413	1.71	455	1.93	505	1.65
12	hand	1	1	affermazione	0	802	59	12	274	1.85	265	1.76	516	1.38	424	1.09	376	1.86	375	1.61	425	1.56
12	mouth	1	3	agitazione	0	702	25	10	413	1.5	311	1.56	541	1.75	320	1.44	497	1.82	441	1.54	364	2.04
12	mouth	1	3	agonia	0	750	29	6	294	1.39	332	1.6	305	1.42	480	1.51	444	1.99	476	1.69	600	1.32
12	mouth	1	2	alghe	0	723	24	5	669	0.62	657	0.73	422	1.93	269	0.6	641	1.48	121	0.54	225	1.34
12	hand	1	2	alveare	0	1283	11	7	679	0.42	674	0.57	421	2.32	267	1.02	609	1.44	150	0.73	363	1.74
12	mouth	1	1	analogia	1		8	8	206	1.34	327	1.79	418	1.55	539	0.95	313	2.1	517	1.55	620	1.2
12	hand	1	2	canoa	0	1069	25	5	679	0.59	688	0.33	440	2.13	335	1.18	600	1.14	114	0.36	288	1.57
12	mouth	1	2	circo	0	900	43	5	616	1.16	660	0.74	453	1.83	228	0.63	626	0.92	179	0.88	205	1
12	mouth	1	1	circostanza	0	826	70	11	273	1.7	228	1.49	412	1.73	479	1.23	331	2.09	485	1.31	642	0.61
12	hand	1	1	concetto	0	734	118	8	168	0.99	224	1.5	509	1.69	426	0.92	315	2.06	635	1.3	544	1.71
12	hand	1	3	conflitto	0	763	140	9	304	1.25	348	1.81	416	2.19	444	1.15	432	1.87	424	1.1	553	1.39
12	mouth	1	2	cravatta	0	559	38	8	694	0.24	688	0.44	552	1.87	250	0.93	675	0.58	105	0.22	200	1.2
12	hand	1	3	disperazione	0	973	101	12	311	1.55	428	1.74	505	1.61	389	1.35	501	1.86	459	1.43	427	1.96
12	hand	1	2	elefante	0	1205	36	8	669	0.6	695	0.23	482	1.77	210	0.79	618	1.45	100	0	296	1.9
12	mouth	1	3	emergenza	0	667	161	9	315	1.64	348	1.9	500	1.6	400	1.21	474	1.88	456	1.37	509	1.42
12	hand	1	2	falce	1		5	5	662	0.82	632	1.3	387	1.85	365	1.04	575	1.7	129	0.56	288	1.32
12	hand	1	3	fallimento	0	905	99	10	344	1.59	263	1.74	455	1.8	420	1.28	400	1.94	450	1.69	520	1.85
12	hand	1	1	fascino	1		149	7	246	1.56	430	1.33	495	1.75	475	1.18	476	1.83	535	1.28	550	1.44
12	hand	1	2	flotta	0	807	35	6	600	1.2	644	0.75	442	1.71	330	0.95	582	1.66	163	0.72	375	1.9
12	mouth	1	3	fremito	0	995	11	7	335	1.79	312	1.84	273	1.33	516	1.26	304	2.03	390	1.95	600	1.44
12	mouth	1	1	funzione	0	783	185	8	273	1.33	274	1.97	414	1.34	420	1.64	341	1.89	465	1.86	592	1.5
12	hand	1	2	gallo	0	704	12	5	700	0	695	0.23	486	1.74	215	0.75	600	1.39	112	0.54	212	1.48
12	mouth	1	2	giraffa	0	672	1	7	681	0.49	674	0.69	463	2.39	181	0.54	644	1.42	106	0.24	306	1.78
12	mouth	1	3	giuramento	0	746	13	10	309	1.5	344	1.91	393	1.44	400	1.12	417	1.76	400	1.9	553	1.21
12	hand	1	3	impulso	0	775	50	7	300	1.63	300	1.89	437	1.92	452	1.28	338	1.84	506	1	463	1.56
12	mouth	1	1	indiscrezione	0	847	16	13	188	0.99	191	1.16	395	1.9	556	1.15	303	1.71	562	1.26	616	1.49
12	mouth	1	1	inefficienza	0	782	17	12	245	1.3	274	1.56	418	1.87	521	1.14	345	1.88	515	1.69	563	1.71
12	mouth	1	1	inesperienza	0	781	5	12	232	1.19	220	1.42	427	1.83	458	1.32	355	1.77	550	1.48	556	1.54
12	hand	1	1	insufficienza	0	1144	15	13	265	1.67	230	1.55	416	2.03	363	1.2	388	2.09	526	1.42	503	1.49
12	hand	1	3	ira	0	894	45	3	296	1.43	391	1.98	395	2.07	400	1.21	382	1.71	474	1.42	491	1.55
12	hand	1	1	logica	0	1034	107	6	220	1.42	195	1.43	536	1.38	435	1.42	362	1.92	559	1.33	580	1.76
12	hand	1	1	merito	0	843	141	6	232	1.38	235	1.67	489	1.41	352	1.23	382	1.82	556	1.5	450	1.81
12	hand	1	2	minerale	0	769	9	8	627	0.88	538	1.46	447	1.71	396	1	505	2.09	174	1.08	388	1.26
12	hand	1	2	oca	0	890	29	3	685	0.54	700	0	468	2.21	150	0.52	659	1.08	106	0.24	197	1.33
12	hand	1	3	orrore	0	721	77	6	305	1.29	356	1.74	491	1.78	400	1.38	475	1.8	450	1.71	363	1.71
12	mouth	1	1	ozio	0	1141	9	4	268	1.43	384	1.91	445	1.99	450	1.33	494	1.69	480	1.79	568	0.95
12	mouth	1	2	palude	0	928	12	6	645	0.77	613	1.13	332	1.93	341	0.95	578	1.65	175	0.9	310	2.05
12	mouth	1	3	pericolo	0	816	250	8	323	1.5	361	1.85	511	1.85	231	0.7	506	1.77	394	1.37	397	1.51
12	hand	1	1	reputazione	0	734	27	11	215	1.01	213	1.39	411	1.76	569	0.95	282	1.85	594	1.2	619	1
12	hand	1	3	stupore	0	887	62	7	339	1.61	440	1.68	515	1.37	366	1.18	422	1.83	496	1.55	500	1.69
12	mouth	1	2	telegrafo	0	646	3	9	614	1.46	556	1.44	321	1.75	438	1.28	455	2.35	153	1.24	531	1.25
12	mouth	1	1	tendenza	0	638	161	8	169	0.87	184	1.12	455	1.9	530	1.69	294	1.76	591	1.4	604	1.06
12	mouth	1	3	terrore	0	677	96	7	297	1.38	408	1.87	421	1.93	326	1.08	488	1.71	455	1.7	463	2.11
12	mouth	1	2	torre	1		44	5	656	0.63	674	0.45	423	2.02	245	0.89	579	1.63	129	0.76	228	1.59
12	mouth	1	3	tradimento	0	705	73	10	363	1.2	300	1.83	464	2.05	415	1.18	485	1.88	418	1.49	432	2.04
12	mouth	1	2	trattore	0	789	2	8	685	0.44	672	0.74	482	2.11	209	0.75	669	0.6	105	0.22	216	1.68
12	hand	1	1	unanimità	0	824	37	8	241	1.46	308	2.1	306	1.6	512	1.25	369	1.62	545	1.73	632	1.11
13	mouth	1	3	abbandono	0	919	91	9	297	1.55	300	1.73	397	1.79	374	1.52	413	1.71	455	1.93	505	1.65
13	mouth	1	1	affermazione	0	958	59	12	274	1.85	265	1.76	516	1.38	424	1.09	376	1.86	375	1.61	425	1.56
13	hand	1	3	agitazione	0	869	25	10	413	1.5	311	1.56	541	1.75	320	1.44	497	1.82	441	1.54	364	2.04
13	hand	1	3	agonia	0	844	29	6	294	1.39	332	1.6	305	1.42	480	1.51	444	1.99	476	1.69	600	1.32
13	hand	1	2	alghe	0	699	24	5	669	0.62	657	0.73	422	1.93	269	0.6	641	1.48	121	0.54	225	1.34
13	mouth	1	2	alveare	0	921	11	7	679	0.42	674	0.57	421	2.32	267	1.02	609	1.44	150	0.73	363	1.74
13	hand	1	1	analogia	0	858	8	8	206	1.34	327	1.79	418	1.55	539	0.95	313	2.1	517	1.55	620	1.2
13	mouth	1	2	canoa	0	847	25	5	679	0.59	688	0.33	440	2.13	335	1.18	600	1.14	114	0.36	288	1.57
13	hand	1	2	circo	0	814	43	5	616	1.16	660	0.74	453	1.83	228	0.63	626	0.92	179	0.88	205	1
13	hand	1	1	circostanza	0	782	70	11	273	1.7	228	1.49	412	1.73	479	1.23	331	2.09	485	1.31	642	0.61
13	mouth	1	1	concetto	0	858	118	8	168	0.99	224	1.5	509	1.69	426	0.92	315	2.06	635	1.3	544	1.71
13	mouth	1	3	conflitto	0	705	140	9	304	1.25	348	1.81	416	2.19	444	1.15	432	1.87	424	1.1	553	1.39
13	hand	1	2	cravatta	1		38	8	694	0.24	688	0.44	552	1.87	250	0.93	675	0.58	105	0.22	200	1.2
13	mouth	1	3	disperazione	0	1170	101	12	311	1.55	428	1.74	505	1.61	389	1.35	501	1.86	459	1.43	427	1.96
13	mouth	1	2	elefante	0	1016	36	8	669	0.6	695	0.23	482	1.77	210	0.79	618	1.45	100	0	296	1.9
13	hand	1	3	emergenza	0	730	161	9	315	1.64	348	1.9	500	1.6	400	1.21	474	1.88	456	1.37	509	1.42
13	mouth	1	2	falce	0	1315	5	5	662	0.82	632	1.3	387	1.85	365	1.04	575	1.7	129	0.56	288	1.32
13	mouth	1	3	fallimento	0	853	99	10	344	1.59	263	1.74	455	1.8	420	1.28	400	1.94	450	1.69	520	1.85
13	mouth	1	1	fascino	0	665	149	7	246	1.56	430	1.33	495	1.75	475	1.18	476	1.83	535	1.28	550	1.44
13	mouth	1	2	flotta	0	984	35	6	600	1.2	644	0.75	442	1.71	330	0.95	582	1.66	163	0.72	375	1.9
13	hand	1	3	fremito	1		11	7	335	1.79	312	1.84	273	1.33	516	1.26	304	2.03	390	1.95	600	1.44
13	hand	1	1	funzione	0	811	185	8	273	1.33	274	1.97	414	1.34	420	1.64	341	1.89	465	1.86	592	1.5
13	mouth	1	2	gallo	0	1229	12	5	700	0	695	0.23	486	1.74	215	0.75	600	1.39	112	0.54	212	1.48
13	hand	1	2	giraffa	0	972	1	7	681	0.49	674	0.69	463	2.39	181	0.54	644	1.42	106	0.24	306	1.78
13	hand	1	3	giuramento	0	804	13	10	309	1.5	344	1.91	393	1.44	400	1.12	417	1.76	400	1.9	553	1.21
13	mouth	1	3	impulso	0	934	50	7	300	1.63	300	1.89	437	1.92	452	1.28	338	1.84	506	1	463	1.56
13	hand	1	1	indiscrezione	0	1259	16	13	188	0.99	191	1.16	395	1.9	556	1.15	303	1.71	562	1.26	616	1.49
13	hand	1	1	inefficienza	0	1298	17	12	245	1.3	274	1.56	418	1.87	521	1.14	345	1.88	515	1.69	563	1.71
13	hand	1	1	inesperienza	0	1268	5	12	232	1.19	220	1.42	427	1.83	458	1.32	355	1.77	550	1.48	556	1.54
13	mouth	1	1	insufficienza	0	1311	15	13	265	1.67	230	1.55	416	2.03	363	1.2	388	2.09	526	1.42	503	1.49
13	mouth	1	3	ira	0	1092	45	3	296	1.43	391	1.98	395	2.07	400	1.21	382	1.71	474	1.42	491	1.55
13	mouth	1	1	logica	0	927	107	6	220	1.42	195	1.43	536	1.38	435	1.42	362	1.92	559	1.33	580	1.76
13	mouth	1	1	merito	0	821	141	6	232	1.38	235	1.67	489	1.41	352	1.23	382	1.82	556	1.5	450	1.81
13	mouth	1	2	minerale	0	701	9	8	627	0.88	538	1.46	447	1.71	396	1	505	2.09	174	1.08	388	1.26
13	mouth	1	2	oca	0	866	29	3	685	0.54	700	0	468	2.21	150	0.52	659	1.08	106	0.24	197	1.33
13	mouth	1	3	orrore	0	1001	77	6	305	1.29	356	1.74	491	1.78	400	1.38	475	1.8	450	1.71	363	1.71
13	hand	1	1	ozio	0	802	9	4	268	1.43	384	1.91	445	1.99	450	1.33	494	1.69	480	1.79	568	0.95
13	hand	1	2	palude	0	736	12	6	645	0.77	613	1.13	332	1.93	341	0.95	578	1.65	175	0.9	310	2.05
13	hand	1	3	pericolo	0	1341	250	8	323	1.5	361	1.85	511	1.85	231	0.7	506	1.77	394	1.37	397	1.51
13	mouth	1	1	reputazione	0	1075	27	11	215	1.01	213	1.39	411	1.76	569	0.95	282	1.85	594	1.2	619	1
13	mouth	1	3	stupore	0	810	62	7	339	1.61	440	1.68	515	1.37	366	1.18	422	1.83	496	1.55	500	1.69
13	hand	1	2	telegrafo	0	773	3	9	614	1.46	556	1.44	321	1.75	438	1.28	455	2.35	153	1.24	531	1.25
13	hand	1	1	tendenza	0	768	161	8	169	0.87	184	1.12	455	1.9	530	1.69	294	1.76	591	1.4	604	1.06
13	hand	1	3	terrore	0	1125	96	7	297	1.38	408	1.87	421	1.93	326	1.08	488	1.71	455	1.7	463	2.11
13	hand	1	2	torre	0	726	44	5	656	0.63	674	0.45	423	2.02	245	0.89	579	1.63	129	0.76	228	1.59
13	hand	1	3	tradimento	0	851	73	10	363	1.2	300	1.83	464	2.05	415	1.18	485	1.88	418	1.49	432	2.04
13	hand	1	2	trattore	0	838	2	8	685	0.44	672	0.74	482	2.11	209	0.75	669	0.6	105	0.22	216	1.68
13	mouth	1	1	unanimità	0	1463	37	8	241	1.46	308	2.1	306	1.6	512	1.25	369	1.62	545	1.73	632	1.11
14	mouth	1	3	abbandono	0	687	91	9	297	1.55	300	1.73	397	1.79	374	1.52	413	1.71	455	1.93	505	1.65
14	mouth	1	1	affermazione	0	747	59	12	274	1.85	265	1.76	516	1.38	424	1.09	376	1.86	375	1.61	425	1.56
14	hand	1	3	agitazione	0	754	25	10	413	1.5	311	1.56	541	1.75	320	1.44	497	1.82	441	1.54	364	2.04
14	hand	1	3	agonia	0	710	29	6	294	1.39	332	1.6	305	1.42	480	1.51	444	1.99	476	1.69	600	1.32
14	hand	1	2	alghe	0	701	24	5	669	0.62	657	0.73	422	1.93	269	0.6	641	1.48	121	0.54	225	1.34
14	mouth	1	2	alveare	0	682	11	7	679	0.42	674	0.57	421	2.32	267	1.02	609	1.44	150	0.73	363	1.74
14	hand	1	1	analogia	0	694	8	8	206	1.34	327	1.79	418	1.55	539	0.95	313	2.1	517	1.55	620	1.2
14	mouth	1	2	canoa	0	866	25	5	679	0.59	688	0.33	440	2.13	335	1.18	600	1.14	114	0.36	288	1.57
14	hand	1	2	circo	0	796	43	5	616	1.16	660	0.74	453	1.83	228	0.63	626	0.92	179	0.88	205	1
14	hand	1	1	circostanza	0	675	70	11	273	1.7	228	1.49	412	1.73	479	1.23	331	2.09	485	1.31	642	0.61
14	mouth	1	1	concetto	0	519	118	8	168	0.99	224	1.5	509	1.69	426	0.92	315	2.06	635	1.3	544	1.71
14	mouth	1	3	conflitto	0	618	140	9	304	1.25	348	1.81	416	2.19	444	1.15	432	1.87	424	1.1	553	1.39
14	hand	1	2	cravatta	0	891	38	8	694	0.24	688	0.44	552	1.87	250	0.93	675	0.58	105	0.22	200	1.2
14	mouth	1	3	disperazione	0	652	101	12	311	1.55	428	1.74	505	1.61	389	1.35	501	1.86	459	1.43	427	1.96
14	mouth	1	2	elefante	0	591	36	8	669	0.6	695	0.23	482	1.77	210	0.79	618	1.45	100	0	296	1.9
14	hand	1	3	emergenza	0	633	161	9	315	1.64	348	1.9	500	1.6	400	1.21	474	1.88	456	1.37	509	1.42
14	mouth	1	2	falce	0	493	5	5	662	0.82	632	1.3	387	1.85	365	1.04	575	1.7	129	0.56	288	1.32
14	mouth	1	3	fallimento	0	555	99	10	344	1.59	263	1.74	455	1.8	420	1.28	400	1.94	450	1.69	520	1.85
14	mouth	1	1	fascino	0	686	149	7	246	1.56	430	1.33	495	1.75	475	1.18	476	1.83	535	1.28	550	1.44
14	mouth	1	2	flotta	0	771	35	6	600	1.2	644	0.75	442	1.71	330	0.95	582	1.66	163	0.72	375	1.9
14	hand	1	3	fremito	0	934	11	7	335	1.79	312	1.84	273	1.33	516	1.26	304	2.03	390	1.95	600	1.44
14	hand	1	1	funzione	0	632	185	8	273	1.33	274	1.97	414	1.34	420	1.64	341	1.89	465	1.86	592	1.5
14	mouth	1	2	gallo	0	594	12	5	700	0	695	0.23	486	1.74	215	0.75	600	1.39	112	0.54	212	1.48
14	hand	1	2	giraffa	0	798	1	7	681	0.49	674	0.69	463	2.39	181	0.54	644	1.42	106	0.24	306	1.78
14	hand	1	3	giuramento	0	607	13	10	309	1.5	344	1.91	393	1.44	400	1.12	417	1.76	400	1.9	553	1.21
14	mouth	1	3	impulso	0	590	50	7	300	1.63	300	1.89	437	1.92	452	1.28	338	1.84	506	1	463	1.56
14	hand	1	1	indiscrezione	0	991	16	13	188	0.99	191	1.16	395	1.9	556	1.15	303	1.71	562	1.26	616	1.49
14	hand	1	1	inefficienza	0	1004	17	12	245	1.3	274	1.56	418	1.87	521	1.14	345	1.88	515	1.69	563	1.71
14	hand	1	1	inesperienza	0	1320	5	12	232	1.19	220	1.42	427	1.83	458	1.32	355	1.77	550	1.48	556	1.54
14	mouth	1	1	insufficienza	0	835	15	13	265	1.67	230	1.55	416	2.03	363	1.2	388	2.09	526	1.42	503	1.49
14	mouth	1	3	ira	0	717	45	3	296	1.43	391	1.98	395	2.07	400	1.21	382	1.71	474	1.42	491	1.55
14	mouth	1	1	logica	0	565	107	6	220	1.42	195	1.43	536	1.38	435	1.42	362	1.92	559	1.33	580	1.76
14	mouth	1	1	merito	0	719	141	6	232	1.38	235	1.67	489	1.41	352	1.23	382	1.82	556	1.5	450	1.81
14	mouth	1	2	minerale	0	773	9	8	627	0.88	538	1.46	447	1.71	396	1	505	2.09	174	1.08	388	1.26
14	mouth	1	2	oca	0	553	29	3	685	0.54	700	0	468	2.21	150	0.52	659	1.08	106	0.24	197	1.33
14	mouth	1	3	orrore	0	882	77	6	305	1.29	356	1.74	491	1.78	400	1.38	475	1.8	450	1.71	363	1.71
14	hand	1	1	ozio	0	685	9	4	268	1.43	384	1.91	445	1.99	450	1.33	494	1.69	480	1.79	568	0.95
14	hand	1	2	palude	0	896	12	6	645	0.77	613	1.13	332	1.93	341	0.95	578	1.65	175	0.9	310	2.05
14	hand	1	3	pericolo	0	858	250	8	323	1.5	361	1.85	511	1.85	231	0.7	506	1.77	394	1.37	397	1.51
14	mouth	1	1	reputazione	0	609	27	11	215	1.01	213	1.39	411	1.76	569	0.95	282	1.85	594	1.2	619	1
14	mouth	1	3	stupore	0	798	62	7	339	1.61	440	1.68	515	1.37	366	1.18	422	1.83	496	1.55	500	1.69
14	hand	1	2	telegrafo	0	752	3	9	614	1.46	556	1.44	321	1.75	438	1.28	455	2.35	153	1.24	531	1.25
14	hand	1	1	tendenza	0	837	161	8	169	0.87	184	1.12	455	1.9	530	1.69	294	1.76	591	1.4	604	1.06
14	hand	1	3	terrore	0	619	96	7	297	1.38	408	1.87	421	1.93	326	1.08	488	1.71	455	1.7	463	2.11
14	hand	1	2	torre	0	887	44	5	656	0.63	674	0.45	423	2.02	245	0.89	579	1.63	129	0.76	228	1.59
14	hand	1	3	tradimento	0	669	73	10	363	1.2	300	1.83	464	2.05	415	1.18	485	1.88	418	1.49	432	2.04
14	hand	1	2	trattore	0	1158	2	8	685	0.44	672	0.74	482	2.11	209	0.75	669	0.6	105	0.22	216	1.68
14	mouth	1	1	unanimità	0	844	37	8	241	1.46	308	2.1	306	1.6	512	1.25	369	1.62	545	1.73	632	1.11
15	hand	1	3	abbandono	0	866	91	9	297	1.55	300	1.73	397	1.79	374	1.52	413	1.71	455	1.93	505	1.65
15	hand	1	1	affermazione	0	1179	59	12	274	1.85	265	1.76	516	1.38	424	1.09	376	1.86	375	1.61	425	1.56
15	mouth	1	3	agitazione	1		25	10	413	1.5	311	1.56	541	1.75	320	1.44	497	1.82	441	1.54	364	2.04
15	mouth	1	3	agonia	0	1349	29	6	294	1.39	332	1.6	305	1.42	480	1.51	444	1.99	476	1.69	600	1.32
15	mouth	1	2	alghe	0	808	24	5	669	0.62	657	0.73	422	1.93	269	0.6	641	1.48	121	0.54	225	1.34
15	hand	1	2	alveare	0	793	11	7	679	0.42	674	0.57	421	2.32	267	1.02	609	1.44	150	0.73	363	1.74
15	mouth	1	1	analogia	0	990	8	8	206	1.34	327	1.79	418	1.55	539	0.95	313	2.1	517	1.55	620	1.2
15	hand	1	2	canoa	1		25	5	679	0.59	688	0.33	440	2.13	335	1.18	600	1.14	114	0.36	288	1.57
15	mouth	1	2	circo	1		43	5	616	1.16	660	0.74	453	1.83	228	0.63	626	0.92	179	0.88	205	1
15	mouth	1	1	circostanza	0	1137	70	11	273	1.7	228	1.49	412	1.73	479	1.23	331	2.09	485	1.31	642	0.61
15	hand	1	1	concetto	0	932	118	8	168	0.99	224	1.5	509	1.69	426	0.92	315	2.06	635	1.3	544	1.71
15	hand	1	3	conflitto	0	693	140	9	304	1.25	348	1.81	416	2.19	444	1.15	432	1.87	424	1.1	553	1.39
15	mouth	1	2	cravatta	0	1254	38	8	694	0.24	688	0.44	552	1.87	250	0.93	675	0.58	105	0.22	200	1.2
15	hand	1	3	disperazione	0	1045	101	12	311	1.55	428	1.74	505	1.61	389	1.35	501	1.86	459	1.43	427	1.96
15	hand	1	2	elefante	0	779	36	8	669	0.6	695	0.23	482	1.77	210	0.79	618	1.45	100	0	296	1.9
15	mouth	1	3	emergenza	0	1145	161	9	315	1.64	348	1.9	500	1.6	400	1.21	474	1.88	456	1.37	509	1.42
15	hand	1	2	falce	1		5	5	662	0.82	632	1.3	387	1.85	365	1.04	575	1.7	129	0.56	288	1.32
15	hand	1	3	fallimento	0	824	99	10	344	1.59	263	1.74	455	1.8	420	1.28	400	1.94	450	1.69	520	1.85
15	hand	1	1	fascino	0	816	149	7	246	1.56	430	1.33	495	1.75	475	1.18	476	1.83	535	1.28	550	1.44
15	hand	1	2	flotta	0	797	35	6	600	1.2	644	0.75	442	1.71	330	0.95	582	1.66	163	0.72	375	1.9
15	mouth	1	3	fremito	0	836	11	7	335	1.79	312	1.84	273	1.33	516	1.26	304	2.03	390	1.95	600	1.44
15	mouth	1	1	funzione	0	851	185	8	273	1.33	274	1.97	414	1.34	420	1.64	341	1.89	465	1.86	592	1.5
15	hand	1	2	gallo	0	708	12	5	700	0	695	0.23	486	1.74	215	0.75	600	1.39	112	0.54	212	1.48
15	mouth	1	2	giraffa	0	688	1	7	681	0.49	674	0.69	463	2.39	181	0.54	644	1.42	106	0.24	306	1.78
15	mouth	1	3	giuramento	1		13	10	309	1.5	344	1.91	393	1.44	400	1.12	417	1.76	400	1.9	553	1.21
15	hand	1	3	impulso	0	687	50	7	300	1.63	300	1.89	437	1.92	452	1.28	338	1.84	506	1	463	1.56
15	mouth	1	1	indiscrezione	0	1060	16	13	188	0.99	191	1.16	395	1.9	556	1.15	303	1.71	562	1.26	616	1.49
15	mouth	1	1	inefficienza	0	1406	17	12	245	1.3	274	1.56	418	1.87	521	1.14	345	1.88	515	1.69	563	1.71
15	mouth	1	1	inesperienza	0	1084	5	12	232	1.19	220	1.42	427	1.83	458	1.32	355	1.77	550	1.48	556	1.54
15	hand	1	1	insufficienza	0	868	15	13	265	1.67	230	1.55	416	2.03	363	1.2	388	2.09	526	1.42	503	1.49
15	hand	1	3	ira	0	780	45	3	296	1.43	391	1.98	395	2.07	400	1.21	382	1.71	474	1.42	491	1.55
15	hand	1	1	logica	0	675	107	6	220	1.42	195	1.43	536	1.38	435	1.42	362	1.92	559	1.33	580	1.76
15	hand	1	1	merito	0	866	141	6	232	1.38	235	1.67	489	1.41	352	1.23	382	1.82	556	1.5	450	1.81
15	hand	1	2	minerale	0	1044	9	8	627	0.88	538	1.46	447	1.71	396	1	505	2.09	174	1.08	388	1.26
15	hand	1	2	oca	0	984	29	3	685	0.54	700	0	468	2.21	150	0.52	659	1.08	106	0.24	197	1.33
15	hand	1	3	orrore	0	799	77	6	305	1.29	356	1.74	491	1.78	400	1.38	475	1.8	450	1.71	363	1.71
15	mouth	1	1	ozio	0	753	9	4	268	1.43	384	1.91	445	1.99	450	1.33	494	1.69	480	1.79	568	0.95
15	mouth	1	2	palude	0	974	12	6	645	0.77	613	1.13	332	1.93	341	0.95	578	1.65	175	0.9	310	2.05
15	mouth	1	3	pericolo	0	1341	250	8	323	1.5	361	1.85	511	1.85	231	0.7	506	1.77	394	1.37	397	1.51
15	hand	1	1	reputazione	0	1284	27	11	215	1.01	213	1.39	411	1.76	569	0.95	282	1.85	594	1.2	619	1
15	hand	1	3	stupore	0	706	62	7	339	1.61	440	1.68	515	1.37	366	1.18	422	1.83	496	1.55	500	1.69
15	mouth	1	2	telegrafo	0	938	3	9	614	1.46	556	1.44	321	1.75	438	1.28	455	2.35	153	1.24	531	1.25
15	mouth	1	1	tendenza	0	682	161	8	169	0.87	184	1.12	455	1.9	530	1.69	294	1.76	591	1.4	604	1.06
15	mouth	1	3	terrore	0	866	96	7	297	1.38	408	1.87	421	1.93	326	1.08	488	1.71	455	1.7	463	2.11
15	mouth	1	2	torre	0	909	44	5	656	0.63	674	0.45	423	2.02	245	0.89	579	1.63	129	0.76	228	1.59
15	mouth	1	3	tradimento	0	1022	73	10	363	1.2	300	1.83	464	2.05	415	1.18	485	1.88	418	1.49	432	2.04
15	mouth	1	2	trattore	1		2	8	685	0.44	672	0.74	482	2.11	209	0.75	669	0.6	105	0.22	216	1.68
15	hand	1	1	unanimità	1		37	8	241	1.46	308	2.1	306	1.6	512	1.25	369	1.62	545	1.73	632	1.11
16	hand	1	3	abbandono	0	751	91	9	297	1.55	300	1.73	397	1.79	374	1.52	413	1.71	455	1.93	505	1.65
16	hand	1	1	affermazione	0	691	59	12	274	1.85	265	1.76	516	1.38	424	1.09	376	1.86	375	1.61	425	1.56
16	mouth	1	3	agitazione	0	625	25	10	413	1.5	311	1.56	541	1.75	320	1.44	497	1.82	441	1.54	364	2.04
16	mouth	1	3	agonia	0	628	29	6	294	1.39	332	1.6	305	1.42	480	1.51	444	1.99	476	1.69	600	1.32
16	mouth	1	2	alghe	0	892	24	5	669	0.62	657	0.73	422	1.93	269	0.6	641	1.48	121	0.54	225	1.34
16	hand	1	2	alveare	0	797	11	7	679	0.42	674	0.57	421	2.32	267	1.02	609	1.44	150	0.73	363	1.74
16	mouth	1	1	analogia	0	807	8	8	206	1.34	327	1.79	418	1.55	539	0.95	313	2.1	517	1.55	620	1.2
16	hand	1	2	canoa	0	722	25	5	679	0.59	688	0.33	440	2.13	335	1.18	600	1.14	114	0.36	288	1.57
16	mouth	1	2	circo	0	619	43	5	616	1.16	660	0.74	453	1.83	228	0.63	626	0.92	179	0.88	205	1
16	mouth	1	1	circostanza	0	842	70	11	273	1.7	228	1.49	412	1.73	479	1.23	331	2.09	485	1.31	642	0.61
16	hand	1	1	concetto	0	759	118	8	168	0.99	224	1.5	509	1.69	426	0.92	315	2.06	635	1.3	544	1.71
16	hand	1	3	conflitto	0	784	140	9	304	1.25	348	1.81	416	2.19	444	1.15	432	1.87	424	1.1	553	1.39
16	mouth	1	2	cravatta	0	769	38	8	694	0.24	688	0.44	552	1.87	250	0.93	675	0.58	105	0.22	200	1.2
16	hand	1	3	disperazione	0	892	101	12	311	1.55	428	1.74	505	1.61	389	1.35	501	1.86	459	1.43	427	1.96
16	hand	1	2	elefante	0	1404	36	8	669	0.6	695	0.23	482	1.77	210	0.79	618	1.45	100	0	296	1.9
16	mouth	1	3	emergenza	0	852	161	9	315	1.64	348	1.9	500	1.6	400	1.21	474	1.88	456	1.37	509	1.42
16	hand	1	2	falce	0	775	5	5	662	0.82	632	1.3	387	1.85	365	1.04	575	1.7	129	0.56	288	1.32
16	hand	1	3	fallimento	0	690	99	10	344	1.59	263	1.74	455	1.8	420	1.28	400	1.94	450	1.69	520	1.85
16	hand	1	1	fascino	0	815	149	7	246	1.56	430	1.33	495	1.75	475	1.18	476	1.83	535	1.28	550	1.44
16	hand	1	2	flotta	0	958	35	6	600	1.2	644	0.75	442	1.71	330	0.95	582	1.66	163	0.72	375	1.9
16	mouth	1	3	fremito	0	615	11	7	335	1.79	312	1.84	273	1.33	516	1.26	304	2.03	390	1.95	600	1.44
16	mouth	1	1	funzione	0	842	185	8	273	1.33	274	1.97	414	1.34	420	1.64	341	1.89	465	1.86	592	1.5
16	hand	1	2	gallo	0	1272	12	5	700	0	695	0.23	486	1.74	215	0.75	600	1.39	112	0.54	212	1.48
16	mouth	1	2	giraffa	0	703	1	7	681	0.49	674	0.69	463	2.39	181	0.54	644	1.42	106	0.24	306	1.78
16	mouth	1	3	giuramento	0	805	13	10	309	1.5	344	1.91	393	1.44	400	1.12	417	1.76	400	1.9	553	1.21
16	hand	1	3	impulso	0	533	50	7	300	1.63	300	1.89	437	1.92	452	1.28	338	1.84	506	1	463	1.56
16	mouth	1	1	indiscrezione	0	722	16	13	188	0.99	191	1.16	395	1.9	556	1.15	303	1.71	562	1.26	616	1.49
16	mouth	1	1	inefficienza	0	805	17	12	245	1.3	274	1.56	418	1.87	521	1.14	345	1.88	515	1.69	563	1.71
16	mouth	1	1	inesperienza	1		5	12	232	1.19	220	1.42	427	1.83	458	1.32	355	1.77	550	1.48	556	1.54
16	hand	1	1	insufficienza	0	667	15	13	265	1.67	230	1.55	416	2.03	363	1.2	388	2.09	526	1.42	503	1.49
16	hand	1	3	ira	0	643	45	3	296	1.43	391	1.98	395	2.07	400	1.21	382	1.71	474	1.42	491	1.55
16	hand	1	1	logica	0	932	107	6	220	1.42	195	1.43	536	1.38	435	1.42	362	1.92	559	1.33	580	1.76
16	hand	1	1	merito	0	564	141	6	232	1.38	235	1.67	489	1.41	352	1.23	382	1.82	556	1.5	450	1.81
16	hand	1	2	minerale	0	894	9	8	627	0.88	538	1.46	447	1.71	396	1	505	2.09	174	1.08	388	1.26
16	hand	1	2	oca	0	566	29	3	685	0.54	700	0	468	2.21	150	0.52	659	1.08	106	0.24	197	1.33
16	hand	1	3	orrore	0	902	77	6	305	1.29	356	1.74	491	1.78	400	1.38	475	1.8	450	1.71	363	1.71
16	mouth	1	1	ozio	0	594	9	4	268	1.43	384	1.91	445	1.99	450	1.33	494	1.69	480	1.79	568	0.95
16	mouth	1	2	palude	0	619	12	6	645	0.77	613	1.13	332	1.93	341	0.95	578	1.65	175	0.9	310	2.05
16	mouth	1	3	pericolo	1		250	8	323	1.5	361	1.85	511	1.85	231	0.7	506	1.77	394	1.37	397	1.51
16	hand	1	1	reputazione	0	792	27	11	215	1.01	213	1.39	411	1.76	569	0.95	282	1.85	594	1.2	619	1
16	hand	1	3	stupore	0	857	62	7	339	1.61	440	1.68	515	1.37	366	1.18	422	1.83	496	1.55	500	1.69
16	mouth	1	2	telegrafo	0	984	3	9	614	1.46	556	1.44	321	1.75	438	1.28	455	2.35	153	1.24	531	1.25
16	mouth	1	1	tendenza	0	695	161	8	169	0.87	184	1.12	455	1.9	530	1.69	294	1.76	591	1.4	604	1.06
16	mouth	1	3	terrore	0	648	96	7	297	1.38	408	1.87	421	1.93	326	1.08	488	1.71	455	1.7	463	2.11
16	mouth	1	2	torre	0	657	44	5	656	0.63	674	0.45	423	2.02	245	0.89	579	1.63	129	0.76	228	1.59
16	mouth	1	3	tradimento	0	526	73	10	363	1.2	300	1.83	464	2.05	415	1.18	485	1.88	418	1.49	432	2.04
16	mouth	1	2	trattore	0	586	2	8	685	0.44	672	0.74	482	2.11	209	0.75	669	0.6	105	0.22	216	1.68
16	hand	1	1	unanimità	0	819	37	8	241	1.46	308	2.1	306	1.6	512	1.25	369	1.62	545	1.73	632	1.11
17	hand	1	3	abbandono	0	696	91	9	297	1.55	300	1.73	397	1.79	374	1.52	413	1.71	455	1.93	505	1.65
17	hand	1	1	affermazione	0	626	59	12	274	1.85	265	1.76	516	1.38	424	1.09	376	1.86	375	1.61	425	1.56
17	mouth	1	3	agitazione	0	646	25	10	413	1.5	311	1.56	541	1.75	320	1.44	497	1.82	441	1.54	364	2.04
17	mouth	1	3	agonia	0	634	29	6	294	1.39	332	1.6	305	1.42	480	1.51	444	1.99	476	1.69	600	1.32
17	mouth	1	2	alghe	0	526	24	5	669	0.62	657	0.73	422	1.93	269	0.6	641	1.48	121	0.54	225	1.34
17	hand	1	2	alveare	0	804	11	7	679	0.42	674	0.57	421	2.32	267	1.02	609	1.44	150	0.73	363	1.74
17	mouth	1	1	analogia	0	616	8	8	206	1.34	327	1.79	418	1.55	539	0.95	313	2.1	517	1.55	620	1.2
17	hand	1	2	canoa	0	885	25	5	679	0.59	688	0.33	440	2.13	335	1.18	600	1.14	114	0.36	288	1.57
17	mouth	1	2	circo	1		43	5	616	1.16	660	0.74	453	1.83	228	0.63	626	0.92	179	0.88	205	1
17	mouth	1	1	circostanza	0	579	70	11	273	1.7	228	1.49	412	1.73	479	1.23	331	2.09	485	1.31	642	0.61
17	hand	1	1	concetto	0	576	118	8	168	0.99	224	1.5	509	1.69	426	0.92	315	2.06	635	1.3	544	1.71
17	hand	1	3	conflitto	0	634	140	9	304	1.25	348	1.81	416	2.19	444	1.15	432	1.87	424	1.1	553	1.39
17	mouth	1	2	cravatta	0	673	38	8	694	0.24	688	0.44	552	1.87	250	0.93	675	0.58	105	0.22	200	1.2
17	hand	1	3	disperazione	0	679	101	12	311	1.55	428	1.74	505	1.61	389	1.35	501	1.86	459	1.43	427	1.96
17	hand	1	2	elefante	0	751	36	8	669	0.6	695	0.23	482	1.77	210	0.79	618	1.45	100	0	296	1.9
17	mouth	1	3	emergenza	0	740	161	9	315	1.64	348	1.9	500	1.6	400	1.21	474	1.88	456	1.37	509	1.42
17	hand	1	2	falce	0	620	5	5	662	0.82	632	1.3	387	1.85	365	1.04	575	1.7	129	0.56	288	1.32
17	hand	1	3	fallimento	0	603	99	10	344	1.59	263	1.74	455	1.8	420	1.28	400	1.94	450	1.69	520	1.85
17	hand	1	1	fascino	0	907	149	7	246	1.56	430	1.33	495	1.75	475	1.18	476	1.83	535	1.28	550	1.44
17	hand	1	2	flotta	0	635	35	6	600	1.2	644	0.75	442	1.71	330	0.95	582	1.66	163	0.72	375	1.9
17	mouth	1	3	fremito	1		11	7	335	1.79	312	1.84	273	1.33	516	1.26	304	2.03	390	1.95	600	1.44
17	mouth	1	1	funzione	0	795	185	8	273	1.33	274	1.97	414	1.34	420	1.64	341	1.89	465	1.86	592	1.5
17	hand	1	2	gallo	0	803	12	5	700	0	695	0.23	486	1.74	215	0.75	600	1.39	112	0.54	212	1.48
17	mouth	1	2	giraffa	0	553	1	7	681	0.49	674	0.69	463	2.39	181	0.54	644	1.42	106	0.24	306	1.78
17	mouth	1	3	giuramento	0	639	13	10	309	1.5	344	1.91	393	1.44	400	1.12	417	1.76	400	1.9	553	1.21
17	hand	1	3	impulso	0	616	50	7	300	1.63	300	1.89	437	1.92	452	1.28	338	1.84	506	1	463	1.56
17	mouth	1	1	indiscrezione	0	630	16	13	188	0.99	191	1.16	395	1.9	556	1.15	303	1.71	562	1.26	616	1.49
17	mouth	1	1	inefficienza	0	790	17	12	245	1.3	274	1.56	418	1.87	521	1.14	345	1.88	515	1.69	563	1.71
17	mouth	1	1	inesperienza	0	770	5	12	232	1.19	220	1.42	427	1.83	458	1.32	355	1.77	550	1.48	556	1.54
17	hand	1	1	insufficienza	0	748	15	13	265	1.67	230	1.55	416	2.03	363	1.2	388	2.09	526	1.42	503	1.49
17	hand	1	3	ira	0	686	45	3	296	1.43	391	1.98	395	2.07	400	1.21	382	1.71	474	1.42	491	1.55
17	hand	1	1	logica	0	615	107	6	220	1.42	195	1.43	536	1.38	435	1.42	362	1.92	559	1.33	580	1.76
17	hand	1	1	merito	0	614	141	6	232	1.38	235	1.67	489	1.41	352	1.23	382	1.82	556	1.5	450	1.81
17	hand	1	2	minerale	0	741	9	8	627	0.88	538	1.46	447	1.71	396	1	505	2.09	174	1.08	388	1.26
17	hand	1	2	oca	0	576	29	3	685	0.54	700	0	468	2.21	150	0.52	659	1.08	106	0.24	197	1.33
17	hand	1	3	orrore	0	515	77	6	305	1.29	356	1.74	491	1.78	400	1.38	475	1.8	450	1.71	363	1.71
17	mouth	1	1	ozio	0	510	9	4	268	1.43	384	1.91	445	1.99	450	1.33	494	1.69	480	1.79	568	0.95
17	mouth	1	2	palude	0	901	12	6	645	0.77	613	1.13	332	1.93	341	0.95	578	1.65	175	0.9	310	2.05
17	mouth	1	3	pericolo	0	582	250	8	323	1.5	361	1.85	511	1.85	231	0.7	506	1.77	394	1.37	397	1.51
17	hand	1	1	reputazione	0	662	27	11	215	1.01	213	1.39	411	1.76	569	0.95	282	1.85	594	1.2	619	1
17	hand	1	3	stupore	0	547	62	7	339	1.61	440	1.68	515	1.37	366	1.18	422	1.83	496	1.55	500	1.69
17	mouth	1	2	telegrafo	0	761	3	9	614	1.46	556	1.44	321	1.75	438	1.28	455	2.35	153	1.24	531	1.25
17	mouth	1	1	tendenza	0	588	161	8	169	0.87	184	1.12	455	1.9	530	1.69	294	1.76	591	1.4	604	1.06
17	mouth	1	3	terrore	0	653	96	7	297	1.38	408	1.87	421	1.93	326	1.08	488	1.71	455	1.7	463	2.11
17	mouth	1	2	torre	0	763	44	5	656	0.63	674	0.45	423	2.02	245	0.89	579	1.63	129	0.76	228	1.59
17	mouth	1	3	tradimento	0	759	73	10	363	1.2	300	1.83	464	2.05	415	1.18	485	1.88	418	1.49	432	2.04
17	mouth	1	2	trattore	0	632	2	8	685	0.44	672	0.74	482	2.11	209	0.75	669	0.6	105	0.22	216	1.68
17	hand	1	1	unanimità	0	1186	37	8	241	1.46	308	2.1	306	1.6	512	1.25	369	1.62	545	1.73	632	1.11
18	mouth	1	3	abbandono	0	903	91	9	297	1.55	300	1.73	397	1.79	374	1.52	413	1.71	455	1.93	505	1.65
18	mouth	1	1	affermazione	0	1059	59	12	274	1.85	265	1.76	516	1.38	424	1.09	376	1.86	375	1.61	425	1.56
18	hand	1	3	agitazione	1		25	10	413	1.5	311	1.56	541	1.75	320	1.44	497	1.82	441	1.54	364	2.04
18	hand	1	3	agonia	0	916	29	6	294	1.39	332	1.6	305	1.42	480	1.51	444	1.99	476	1.69	600	1.32
18	hand	1	2	alghe	0	974	24	5	669	0.62	657	0.73	422	1.93	269	0.6	641	1.48	121	0.54	225	1.34
18	mouth	1	2	alveare	1		11	7	679	0.42	674	0.57	421	2.32	267	1.02	609	1.44	150	0.73	363	1.74
18	hand	1	1	analogia	0	900	8	8	206	1.34	327	1.79	418	1.55	539	0.95	313	2.1	517	1.55	620	1.2
18	mouth	1	2	canoa	0	999	25	5	679	0.59	688	0.33	440	2.13	335	1.18	600	1.14	114	0.36	288	1.57
18	hand	1	2	circo	0	1013	43	5	616	1.16	660	0.74	453	1.83	228	0.63	626	0.92	179	0.88	205	1
18	hand	1	1	circostanza	0	1047	70	11	273	1.7	228	1.49	412	1.73	479	1.23	331	2.09	485	1.31	642	0.61
18	mouth	1	1	concetto	0	835	118	8	168	0.99	224	1.5	509	1.69	426	0.92	315	2.06	635	1.3	544	1.71
18	mouth	1	3	conflitto	0	983	140	9	304	1.25	348	1.81	416	2.19	444	1.15	432	1.87	424	1.1	553	1.39
18	hand	1	2	cravatta	0	889	38	8	694	0.24	688	0.44	552	1.87	250	0.93	675	0.58	105	0.22	200	1.2
18	mouth	1	3	disperazione	0	825	101	12	311	1.55	428	1.74	505	1.61	389	1.35	501	1.86	459	1.43	427	1.96
18	mouth	1	2	elefante	1		36	8	669	0.6	695	0.23	482	1.77	210	0.79	618	1.45	100	0	296	1.9
18	hand	1	3	emergenza	0	707	161	9	315	1.64	348	1.9	500	1.6	400	1.21	474	1.88	456	1.37	509	1.42
18	mouth	1	2	falce	0	1089	5	5	662	0.82	632	1.3	387	1.85	365	1.04	575	1.7	129	0.56	288	1.32
18	mouth	1	3	fallimento	1		99	10	344	1.59	263	1.74	455	1.8	420	1.28	400	1.94	450	1.69	520	1.85
18	mouth	1	1	fascino	0	960	149	7	246	1.56	430	1.33	495	1.75	475	1.18	476	1.83	535	1.28	550	1.44
18	mouth	1	2	flotta	0	1034	35	6	600	1.2	644	0.75	442	1.71	330	0.95	582	1.66	163	0.72	375	1.9
18	hand	1	3	fremito	1		11	7	335	1.79	312	1.84	273	1.33	516	1.26	304	2.03	390	1.95	600	1.44
18	hand	1	1	funzione	0	852	185	8	273	1.33	274	1.97	414	1.34	420	1.64	341	1.89	465	1.86	592	1.5
18	mouth	1	2	gallo	0	959	12	5	700	0	695	0.23	486	1.74	215	0.75	600	1.39	112	0.54	212	1.48
18	hand	1	2	giraffa	0	1410	1	7	681	0.49	674	0.69	463	2.39	181	0.54	644	1.42	106	0.24	306	1.78
18	hand	1	3	giuramento	0	1013	13	10	309	1.5	344	1.91	393	1.44	400	1.12	417	1.76	400	1.9	553	1.21
18	mouth	1	3	impulso	0	753	50	7	300	1.63	300	1.89	437	1.92	452	1.28	338	1.84	506	1	463	1.56
18	hand	1	1	indiscrezione	0	1180	16	13	188	0.99	191	1.16	395	1.9	556	1.15	303	1.71	562	1.26	616	1.49
18	hand	1	1	inefficienza	0	1181	17	12	245	1.3	274	1.56	418	1.87	521	1.14	345	1.88	515	1.69	563	1.71
18	hand	1	1	inesperienza	1		5	12	232	1.19	220	1.42	427	1.83	458	1.32	355	1.77	550	1.48	556	1.54
18	mouth	1	1	insufficienza	0	1312	15	13	265	1.67	230	1.55	416	2.03	363	1.2	388	2.09	526	1.42	503	1.49
18	mouth	1	3	ira	0	865	45	3	296	1.43	391	1.98	395	2.07	400	1.21	382	1.71	474	1.42	491	1.55
18	mouth	1	1	logica	0	1115	107	6	220	1.42	195	1.43	536	1.38	435	1.42	362	1.92	559	1.33	580	1.76
18	mouth	1	1	merito	0	1242	141	6	232	1.38	235	1.67	489	1.41	352	1.23	382	1.82	556	1.5	450	1.81
18	mouth	1	2	minerale	1		9	8	627	0.88	538	1.46	447	1.71	396	1	505	2.09	174	1.08	388	1.26
18	mouth	1	2	oca	1		29	3	685	0.54	700	0	468	2.21	150	0.52	659	1.08	106	0.24	197	1.33
18	mouth	1	3	orrore	0	1453	77	6	305	1.29	356	1.74	491	1.78	400	1.38	475	1.8	450	1.71	363	1.71
18	hand	1	1	ozio	0	807	9	4	268	1.43	384	1.91	445	1.99	450	1.33	494	1.69	480	1.79	568	0.95
18	hand	1	2	palude	0	1207	12	6	645	0.77	613	1.13	332	1.93	341	0.95	578	1.65	175	0.9	310	2.05
18	hand	1	3	pericolo	0	758	250	8	323	1.5	361	1.85	511	1.85	231	0.7	506	1.77	394	1.37	397	1.51
18	mouth	1	1	reputazione	0	857	27	11	215	1.01	213	1.39	411	1.76	569	0.95	282	1.85	594	1.2	619	1
18	mouth	1	3	stupore	0	800	62	7	339	1.61	440	1.68	515	1.37	366	1.18	422	1.83	496	1.55	500	1.69
18	hand	1	2	telegrafo	0	904	3	9	614	1.46	556	1.44	321	1.75	438	1.28	455	2.35	153	1.24	531	1.25
18	hand	1	1	tendenza	0	783	161	8	169	0.87	184	1.12	455	1.9	530	1.69	294	1.76	591	1.4	604	1.06
18	hand	1	3	terrore	0	831	96	7	297	1.38	408	1.87	421	1.93	326	1.08	488	1.71	455	1.7	463	2.11
18	hand	1	2	torre	0	1084	44	5	656	0.63	674	0.45	423	2.02	245	0.89	579	1.63	129	0.76	228	1.59
18	hand	1	3	tradimento	0	880	73	10	363	1.2	300	1.83	464	2.05	415	1.18	485	1.88	418	1.49	432	2.04
18	hand	1	2	trattore	0	1021	2	8	685	0.44	672	0.74	482	2.11	209	0.75	669	0.6	105	0.22	216	1.68
18	mouth	1	1	unanimità	0	1061	37	8	241	1.46	308	2.1	306	1.6	512	1.25	369	1.62	545	1.73	632	1.11
19	mouth	1	3	abbandono	0	655	91	9	297	1.55	300	1.73	397	1.79	374	1.52	413	1.71	455	1.93	505	1.65
19	mouth	1	1	affermazione	0	689	59	12	274	1.85	265	1.76	516	1.38	424	1.09	376	1.86	375	1.61	425	1.56
19	hand	1	3	agitazione	0	621	25	10	413	1.5	311	1.56	541	1.75	320	1.44	497	1.82	441	1.54	364	2.04
19	hand	1	3	agonia	0	774	29	6	294	1.39	332	1.6	305	1.42	480	1.51	444	1.99	476	1.69	600	1.32
19	hand	1	2	alghe	0	677	24	5	669	0.62	657	0.73	422	1.93	269	0.6	641	1.48	121	0.54	225	1.34
19	mouth	1	2	alveare	0	982	11	7	679	0.42	674	0.57	421	2.32	267	1.02	609	1.44	150	0.73	363	1.74
19	hand	1	1	analogia	0	758	8	8	206	1.34	327	1.79	418	1.55	539	0.95	313	2.1	517	1.55	620	1.2
19	mouth	1	2	canoa	0	708	25	5	679	0.59	688	0.33	440	2.13	335	1.18	600	1.14	114	0.36	288	1.57
19	hand	1	2	circo	0	1001	43	5	616	1.16	660	0.74	453	1.83	228	0.63	626	0.92	179	0.88	205	1
19	hand	1	1	circostanza	0	710	70	11	273	1.7	228	1.49	412	1.73	479	1.23	331	2.09	485	1.31	642	0.61
19	mouth	1	1	concetto	0	615	118	8	168	0.99	224	1.5	509	1.69	426	0.92	315	2.06	635	1.3	544	1.71
19	mouth	1	3	conflitto	0	572	140	9	304	1.25	348	1.81	416	2.19	444	1.15	432	1.87	424	1.1	553	1.39
19	hand	1	2	cravatta	0	806	38	8	694	0.24	688	0.44	552	1.87	250	0.93	675	0.58	105	0.22	200	1.2
19	mouth	1	3	disperazione	0	1490	101	12	311	1.55	428	1.74	505	1.61	389	1.35	501	1.86	459	1.43	427	1.96
19	mouth	1	2	elefante	0	908	36	8	669	0.6	695	0.23	482	1.77	210	0.79	618	1.45	100	0	296	1.9
19	hand	1	3	emergenza	0	613	161	9	315	1.64	348	1.9	500	1.6	400	1.21	474	1.88	456	1.37	509	1.42
19	mouth	1	2	falce	0	754	5	5	662	0.82	632	1.3	387	1.85	365	1.04	575	1.7	129	0.56	288	1.32
19	mouth	1	3	fallimento	0	690	99	10	344	1.59	263	1.74	455	1.8	420	1.28	400	1.94	450	1.69	520	1.85
19	mouth	1	1	fascino	0	623	149	7	246	1.56	430	1.33	495	1.75	475	1.18	476	1.83	535	1.28	550	1.44
19	mouth	1	2	flotta	0	675	35	6	600	1.2	644	0.75	442	1.71	330	0.95	582	1.66	163	0.72	375	1.9
19	hand	1	3	fremito	0	868	11	7	335	1.79	312	1.84	273	1.33	516	1.26	304	2.03	390	1.95	600	1.44
19	hand	1	1	funzione	0	609	185	8	273	1.33	274	1.97	414	1.34	420	1.64	341	1.89	465	1.86	592	1.5
19	mouth	1	2	gallo	0	986	12	5	700	0	695	0.23	486	1.74	215	0.75	600	1.39	112	0.54	212	1.48
19	hand	1	2	giraffa	0	888	1	7	681	0.49	674	0.69	463	2.39	181	0.54	644	1.42	106	0.24	306	1.78
19	hand	1	3	giuramento	0	1388	13	10	309	1.5	344	1.91	393	1.44	400	1.12	417	1.76	400	1.9	553	1.21
19	mouth	1	3	impulso	0	575	50	7	300	1.63	300	1.89	437	1.92	452	1.28	338	1.84	506	1	463	1.56
19	hand	1	1	indiscrezione	0	983	16	13	188	0.99	191	1.16	395	1.9	556	1.15	303	1.71	562	1.26	616	1.49
19	hand	1	1	inefficienza	0	1275	17	12	245	1.3	274	1.56	418	1.87	521	1.14	345	1.88	515	1.69	563	1.71
19	hand	1	1	inesperienza	0	979	5	12	232	1.19	220	1.42	427	1.83	458	1.32	355	1.77	550	1.48	556	1.54
19	mouth	1	1	insufficienza	0	784	15	13	265	1.67	230	1.55	416	2.03	363	1.2	388	2.09	526	1.42	503	1.49
19	mouth	1	3	ira	0	627	45	3	296	1.43	391	1.98	395	2.07	400	1.21	382	1.71	474	1.42	491	1.55
19	mouth	1	1	logica	0	800	107	6	220	1.42	195	1.43	536	1.38	435	1.42	362	1.92	559	1.33	580	1.76
19	mouth	1	1	merito	0	594	141	6	232	1.38	235	1.67	489	1.41	352	1.23	382	1.82	556	1.5	450	1.81
19	mouth	1	2	minerale	0	731	9	8	627	0.88	538	1.46	447	1.71	396	1	505	2.09	174	1.08	388	1.26
19	mouth	1	2	oca	0	813	29	3	685	0.54	700	0	468	2.21	150	0.52	659	1.08	106	0.24	197	1.33
19	mouth	1	3	orrore	0	850	77	6	305	1.29	356	1.74	491	1.78	400	1.38	475	1.8	450	1.71	363	1.71
19	hand	1	1	ozio	0	690	9	4	268	1.43	384	1.91	445	1.99	450	1.33	494	1.69	480	1.79	568	0.95
19	hand	1	2	palude	0	705	12	6	645	0.77	613	1.13	332	1.93	341	0.95	578	1.65	175	0.9	310	2.05
19	hand	1	3	pericolo	0	644	250	8	323	1.5	361	1.85	511	1.85	231	0.7	506	1.77	394	1.37	397	1.51
19	mouth	1	1	reputazione	0	655	27	11	215	1.01	213	1.39	411	1.76	569	0.95	282	1.85	594	1.2	619	1
19	mouth	1	3	stupore	0	1348	62	7	339	1.61	440	1.68	515	1.37	366	1.18	422	1.83	496	1.55	500	1.69
19	hand	1	2	telegrafo	0	702	3	9	614	1.46	556	1.44	321	1.75	438	1.28	455	2.35	153	1.24	531	1.25
19	hand	1	1	tendenza	0	704	161	8	169	0.87	184	1.12	455	1.9	530	1.69	294	1.76	591	1.4	604	1.06
19	hand	1	3	terrore	0	607	96	7	297	1.38	408	1.87	421	1.93	326	1.08	488	1.71	455	1.7	463	2.11
19	hand	1	2	torre	0	859	44	5	656	0.63	674	0.45	423	2.02	245	0.89	579	1.63	129	0.76	228	1.59
19	hand	1	3	tradimento	0	759	73	10	363	1.2	300	1.83	464	2.05	415	1.18	485	1.88	418	1.49	432	2.04
19	hand	1	2	trattore	0	514	2	8	685	0.44	672	0.74	482	2.11	209	0.75	669	0.6	105	0.22	216	1.68
19	mouth	1	1	unanimità	1		37	8	241	1.46	308	2.1	306	1.6	512	1.25	369	1.62	545	1.73	632	1.11
20	hand	1	3	abbandono	0	829	91	9	297	1.55	300	1.73	397	1.79	374	1.52	413	1.71	455	1.93	505	1.65
20	hand	1	1	affermazione	0	1045	59	12	274	1.85	265	1.76	516	1.38	424	1.09	376	1.86	375	1.61	425	1.56
20	mouth	1	3	agitazione	0	933	25	10	413	1.5	311	1.56	541	1.75	320	1.44	497	1.82	441	1.54	364	2.04
20	mouth	1	3	agonia	0	716	29	6	294	1.39	332	1.6	305	1.42	480	1.51	444	1.99	476	1.69	600	1.32
20	mouth	1	2	alghe	1		24	5	669	0.62	657	0.73	422	1.93	269	0.6	641	1.48	121	0.54	225	1.34
20	hand	1	2	alveare	0	705	11	7	679	0.42	674	0.57	421	2.32	267	1.02	609	1.44	150	0.73	363	1.74
20	mouth	1	1	analogia	0	700	8	8	206	1.34	327	1.79	418	1.55	539	0.95	313	2.1	517	1.55	620	1.2
20	hand	1	2	canoa	0	894	25	5	679	0.59	688	0.33	440	2.13	335	1.18	600	1.14	114	0.36	288	1.57
20	mouth	1	2	circo	0	766	43	5	616	1.16	660	0.74	453	1.83	228	0.63	626	0.92	179	0.88	205	1
20	mouth	1	1	circostanza	0	1012	70	11	273	1.7	228	1.49	412	1.73	479	1.23	331	2.09	485	1.31	642	0.61
20	hand	1	1	concetto	0	696	118	8	168	0.99	224	1.5	509	1.69	426	0.92	315	2.06	635	1.3	544	1.71
20	hand	1	3	conflitto	0	871	140	9	304	1.25	348	1.81	416	2.19	444	1.15	432	1.87	424	1.1	553	1.39
20	mouth	1	2	cravatta	0	929	38	8	694	0.24	688	0.44	552	1.87	250	0.93	675	0.58	105	0.22	200	1.2
20	hand	1	3	disperazione	0	928	101	12	311	1.55	428	1.74	505	1.61	389	1.35	501	1.86	459	1.43	427	1.96
20	hand	1	2	elefante	0	854	36	8	669	0.6	695	0.23	482	1.77	210	0.79	618	1.45	100	0	296	1.9
20	mouth	1	3	emergenza	0	664	161	9	315	1.64	348	1.9	500	1.6	400	1.21	474	1.88	456	1.37	509	1.42
20	hand	1	2	falce	0	812	5	5	662	0.82	632	1.3	387	1.85	365	1.04	575	1.7	129	0.56	288	1.32
20	hand	1	3	fallimento	0	861	99	10	344	1.59	263	1.74	455	1.8	420	1.28	400	1.94	450	1.69	520	1.85
20	hand	1	1	fascino	0	821	149	7	246	1.56	430	1.33	495	1.75	475	1.18	476	1.83	535	1.28	550	1.44
20	hand	1	2	flotta	0	775	35	6	600	1.2	644	0.75	442	1.71	330	0.95	582	1.66	163	0.72	375	1.9
20	mouth	1	3	fremito	0	1243	11	7	335	1.79	312	1.84	273	1.33	516	1.26	304	2.03	390	1.95	600	1.44
20	mouth	1	1	funzione	0	817	185	8	273	1.33	274	1.97	414	1.34	420	1.64	341	1.89	465	1.86	592	1.5
20	hand	1	2	gallo	0	886	12	5	700	0	695	0.23	486	1.74	215	0.75	600	1.39	112	0.54	212	1.48
20	mouth	1	2	giraffa	0	672	1	7	681	0.49	674	0.69	463	2.39	181	0.54	644	1.42	106	0.24	306	1.78
20	mouth	1	3	giuramento	0	901	13	10	309	1.5	344	1.91	393	1.44	400	1.12	417	1.76	400	1.9	553	1.21
20	hand	1	3	impulso	0	1008	50	7	300	1.63	300	1.89	437	1.92	452	1.28	338	1.84	506	1	463	1.56
20	mouth	1	1	indiscrezione	0	882	16	13	188	0.99	191	1.16	395	1.9	556	1.15	303	1.71	562	1.26	616	1.49
20	mouth	1	1	inefficienza	0	1036	17	12	245	1.3	274	1.56	418	1.87	521	1.14	345	1.88	515	1.69	563	1.71
20	mouth	1	1	inesperienza	0	1180	5	12	232	1.19	220	1.42	427	1.83	458	1.32	355	1.77	550	1.48	556	1.54
20	hand	1	1	insufficienza	0	967	15	13	265	1.67	230	1.55	416	2.03	363	1.2	388	2.09	526	1.42	503	1.49
20	hand	1	3	ira	0	718	45	3	296	1.43	391	1.98	395	2.07	400	1.21	382	1.71	474	1.42	491	1.55
20	hand	1	1	logica	0	746	107	6	220	1.42	195	1.43	536	1.38	435	1.42	362	1.92	559	1.33	580	1.76
20	hand	1	1	merito	0	613	141	6	232	1.38	235	1.67	489	1.41	352	1.23	382	1.82	556	1.5	450	1.81
20	hand	1	2	minerale	0	604	9	8	627	0.88	538	1.46	447	1.71	396	1	505	2.09	174	1.08	388	1.26
20	hand	1	2	oca	0	719	29	3	685	0.54	700	0	468	2.21	150	0.52	659	1.08	106	0.24	197	1.33
20	hand	1	3	orrore	0	674	77	6	305	1.29	356	1.74	491	1.78	400	1.38	475	1.8	450	1.71	363	1.71
20	mouth	1	1	ozio	0	824	9	4	268	1.43	384	1.91	445	1.99	450	1.33	494	1.69	480	1.79	568	0.95
20	mouth	1	2	palude	0	769	12	6	645	0.77	613	1.13	332	1.93	341	0.95	578	1.65	175	0.9	310	2.05
20	mouth	1	3	pericolo	0	722	250	8	323	1.5	361	1.85	511	1.85	231	0.7	506	1.77	394	1.37	397	1.51
20	hand	1	1	reputazione	0	1037	27	11	215	1.01	213	1.39	411	1.76	569	0.95	282	1.85	594	1.2	619	1
20	hand	1	3	stupore	0	713	62	7	339	1.61	440	1.68	515	1.37	366	1.18	422	1.83	496	1.55	500	1.69
20	mouth	1	2	telegrafo	0	839	3	9	614	1.46	556	1.44	321	1.75	438	1.28	455	2.35	153	1.24	531	1.25
20	mouth	1	1	tendenza	0	779	161	8	169	0.87	184	1.12	455	1.9	530	1.69	294	1.76	591	1.4	604	1.06
20	mouth	1	3	terrore	0	778	96	7	297	1.38	408	1.87	421	1.93	326	1.08	488	1.71	455	1.7	463	2.11
20	mouth	1	2	torre	0	1037	44	5	656	0.63	674	0.45	423	2.02	245	0.89	579	1.63	129	0.76	228	1.59
20	mouth	1	3	tradimento	0	838	73	10	363	1.2	300	1.83	464	2.05	415	1.18	485	1.88	418	1.49	432	2.04
20	mouth	1	2	trattore	0	885	2	8	685	0.44	672	0.74	482	2.11	209	0.75	669	0.6	105	0.22	216	1.68
20	hand	1	1	unanimità	1		37	8	241	1.46	308	2.1	306	1.6	512	1.25	369	1.62	545	1.73	632	1.11
21	mouth	1	3	abbandono	0	650	91	9	297	1.55	300	1.73	397	1.79	374	1.52	413	1.71	455	1.93	505	1.65
21	mouth	1	1	affermazione	0	823	59	12	274	1.85	265	1.76	516	1.38	424	1.09	376	1.86	375	1.61	425	1.56
21	hand	1	3	agitazione	0	833	25	10	413	1.5	311	1.56	541	1.75	320	1.44	497	1.82	441	1.54	364	2.04
21	hand	1	3	agonia	0	777	29	6	294	1.39	332	1.6	305	1.42	480	1.51	444	1.99	476	1.69	600	1.32
21	hand	1	2	alghe	0	877	24	5	669	0.62	657	0.73	422	1.93	269	0.6	641	1.48	121	0.54	225	1.34
21	mouth	1	2	alveare	0	684	11	7	679	0.42	674	0.57	421	2.32	267	1.02	609	1.44	150	0.73	363	1.74
21	hand	1	1	analogia	0	663	8	8	206	1.34	327	1.79	418	1.55	539	0.95	313	2.1	517	1.55	620	1.2
21	mouth	1	2	canoa	0	679	25	5	679	0.59	688	0.33	440	2.13	335	1.18	600	1.14	114	0.36	288	1.57
21	hand	1	2	circo	0	784	43	5	616	1.16	660	0.74	453	1.83	228	0.63	626	0.92	179	0.88	205	1
21	hand	1	1	circostanza	0	737	70	11	273	1.7	228	1.49	412	1.73	479	1.23	331	2.09	485	1.31	642	0.61
21	mouth	1	1	concetto	0	794	118	8	168	0.99	224	1.5	509	1.69	426	0.92	315	2.06	635	1.3	544	1.71
21	mouth	1	3	conflitto	0	729	140	9	304	1.25	348	1.81	416	2.19	444	1.15	432	1.87	424	1.1	553	1.39
21	hand	1	2	cravatta	0	1060	38	8	694	0.24	688	0.44	552	1.87	250	0.93	675	0.58	105	0.22	200	1.2
21	mouth	1	3	disperazione	0	1127	101	12	311	1.55	428	1.74	505	1.61	389	1.35	501	1.86	459	1.43	427	1.96
21	mouth	1	2	elefante	0	568	36	8	669	0.6	695	0.23	482	1.77	210	0.79	618	1.45	100	0	296	1.9
21	hand	1	3	emergenza	0	866	161	9	315	1.64	348	1.9	500	1.6	400	1.21	474	1.88	456	1.37	509	1.42
21	mouth	1	2	falce	0	932	5	5	662	0.82	632	1.3	387	1.85	365	1.04	575	1.7	129	0.56	288	1.32
21	mouth	1	3	fallimento	0	710	99	10	344	1.59	263	1.74	455	1.8	420	1.28	400	1.94	450	1.69	520	1.85
21	mouth	1	1	fascino	0	977	149	7	246	1.56	430	1.33	495	1.75	475	1.18	476	1.83	535	1.28	550	1.44
21	mouth	1	2	flotta	0	813	35	6	600	1.2	644	0.75	442	1.71	330	0.95	582	1.66	163	0.72	375	1.9
21	hand	1	3	fremito	0	806	11	7	335	1.79	312	1.84	273	1.33	516	1.26	304	2.03	390	1.95	600	1.44
21	hand	1	1	funzione	0	874	185	8	273	1.33	274	1.97	414	1.34	420	1.64	341	1.89	465	1.86	592	1.5
21	mouth	1	2	gallo	0	1089	12	5	700	0	695	0.23	486	1.74	215	0.75	600	1.39	112	0.54	212	1.48
21	hand	1	2	giraffa	0	904	1	7	681	0.49	674	0.69	463	2.39	181	0.54	644	1.42	106	0.24	306	1.78
21	hand	1	3	giuramento	0	610	13	10	309	1.5	344	1.91	393	1.44	400	1.12	417	1.76	400	1.9	553	1.21
21	mouth	1	3	impulso	0	609	50	7	300	1.63	300	1.89	437	1.92	452	1.28	338	1.84	506	1	463	1.56
21	hand	1	1	indiscrezione	0	784	16	13	188	0.99	191	1.16	395	1.9	556	1.15	303	1.71	562	1.26	616	1.49
21	hand	1	1	inefficienza	0	913	17	12	245	1.3	274	1.56	418	1.87	521	1.14	345	1.88	515	1.69	563	1.71
21	hand	1	1	inesperienza	0	729	5	12	232	1.19	220	1.42	427	1.83	458	1.32	355	1.77	550	1.48	556	1.54
21	mouth	1	1	insufficienza	0	964	15	13	265	1.67	230	1.55	416	2.03	363	1.2	388	2.09	526	1.42	503	1.49
21	mouth	1	3	ira	0	729	45	3	296	1.43	391	1.98	395	2.07	400	1.21	382	1.71	474	1.42	491	1.55
21	mouth	1	1	logica	0	794	107	6	220	1.42	195	1.43	536	1.38	435	1.42	362	1.92	559	1.33	580	1.76
21	mouth	1	1	merito	0	660	141	6	232	1.38	235	1.67	489	1.41	352	1.23	382	1.82	556	1.5	450	1.81
21	mouth	1	2	minerale	0	727	9	8	627	0.88	538	1.46	447	1.71	396	1	505	2.09	174	1.08	388	1.26
21	mouth	1	2	oca	0	755	29	3	685	0.54	700	0	468	2.21	150	0.52	659	1.08	106	0.24	197	1.33
21	mouth	1	3	orrore	0	876	77	6	305	1.29	356	1.74	491	1.78	400	1.38	475	1.8	450	1.71	363	1.71
21	hand	1	1	ozio	0	800	9	4	268	1.43	384	1.91	445	1.99	450	1.33	494	1.69	480	1.79	568	0.95
21	hand	1	2	palude	0	661	12	6	645	0.77	613	1.13	332	1.93	341	0.95	578	1.65	175	0.9	310	2.05
21	hand	1	3	pericolo	0	577	250	8	323	1.5	361	1.85	511	1.85	231	0.7	506	1.77	394	1.37	397	1.51
21	mouth	1	1	reputazione	0	780	27	11	215	1.01	213	1.39	411	1.76	569	0.95	282	1.85	594	1.2	619	1
21	mouth	1	3	stupore	0	693	62	7	339	1.61	440	1.68	515	1.37	366	1.18	422	1.83	496	1.55	500	1.69
21	hand	1	2	telegrafo	0	745	3	9	614	1.46	556	1.44	321	1.75	438	1.28	455	2.35	153	1.24	531	1.25
21	hand	1	1	tendenza	0	636	161	8	169	0.87	184	1.12	455	1.9	530	1.69	294	1.76	591	1.4	604	1.06
21	hand	1	3	terrore	0	659	96	7	297	1.38	408	1.87	421	1.93	326	1.08	488	1.71	455	1.7	463	2.11
21	hand	1	2	torre	0	551	44	5	656	0.63	674	0.45	423	2.02	245	0.89	579	1.63	129	0.76	228	1.59
21	hand	1	3	tradimento	0	548	73	10	363	1.2	300	1.83	464	2.05	415	1.18	485	1.88	418	1.49	432	2.04
21	hand	1	2	trattore	0	541	2	8	685	0.44	672	0.74	482	2.11	209	0.75	669	0.6	105	0.22	216	1.68
21	mouth	1	1	unanimità	0	787	37	8	241	1.46	308	2.1	306	1.6	512	1.25	369	1.62	545	1.73	632	1.11
22	mouth	1	3	abbandono	1		91	9	297	1.55	300	1.73	397	1.79	374	1.52	413	1.71	455	1.93	505	1.65
22	mouth	1	1	affermazione	0	1023	59	12	274	1.85	265	1.76	516	1.38	424	1.09	376	1.86	375	1.61	425	1.56
22	hand	1	3	agitazione	0	874	25	10	413	1.5	311	1.56	541	1.75	320	1.44	497	1.82	441	1.54	364	2.04
22	hand	1	3	agonia	0	596	29	6	294	1.39	332	1.6	305	1.42	480	1.51	444	1.99	476	1.69	600	1.32
22	hand	1	2	alghe	0	1090	24	5	669	0.62	657	0.73	422	1.93	269	0.6	641	1.48	121	0.54	225	1.34
22	mouth	1	2	alveare	0	863	11	7	679	0.42	674	0.57	421	2.32	267	1.02	609	1.44	150	0.73	363	1.74
22	hand	1	1	analogia	0	1039	8	8	206	1.34	327	1.79	418	1.55	539	0.95	313	2.1	517	1.55	620	1.2
22	mouth	1	2	canoa	0	816	25	5	679	0.59	688	0.33	440	2.13	335	1.18	600	1.14	114	0.36	288	1.57
22	hand	1	2	circo	0	767	43	5	616	1.16	660	0.74	453	1.83	228	0.63	626	0.92	179	0.88	205	1
22	hand	1	1	circostanza	0	857	70	11	273	1.7	228	1.49	412	1.73	479	1.23	331	2.09	485	1.31	642	0.61
22	mouth	1	1	concetto	0	1187	118	8	168	0.99	224	1.5	509	1.69	426	0.92	315	2.06	635	1.3	544	1.71
22	mouth	1	3	conflitto	0	722	140	9	304	1.25	348	1.81	416	2.19	444	1.15	432	1.87	424	1.1	553	1.39
22	hand	1	2	cravatta	0	863	38	8	694	0.24	688	0.44	552	1.87	250	0.93	675	0.58	105	0.22	200	1.2
22	mouth	1	3	disperazione	0	1435	101	12	311	1.55	428	1.74	505	1.61	389	1.35	501	1.86	459	1.43	427	1.96
22	mouth	1	2	elefante	0	1250	36	8	669	0.6	695	0.23	482	1.77	210	0.79	618	1.45	100	0	296	1.9
22	hand	1	3	emergenza	0	1246	161	9	315	1.64	348	1.9	500	1.6	400	1.21	474	1.88	456	1.37	509	1.42
22	mouth	1	2	falce	0	1173	5	5	662	0.82	632	1.3	387	1.85	365	1.04	575	1.7	129	0.56	288	1.32
22	mouth	1	3	fallimento	0	802	99	10	344	1.59	263	1.74	455	1.8	420	1.28	400	1.94	450	1.69	520	1.85
22	mouth	1	1	fascino	0	978	149	7	246	1.56	430	1.33	495	1.75	475	1.18	476	1.83	535	1.28	550	1.44
22	mouth	1	2	flotta	0	694	35	6	600	1.2	644	0.75	442	1.71	330	0.95	582	1.66	163	0.72	375	1.9
22	hand	1	3	fremito	1		11	7	335	1.79	312	1.84	273	1.33	516	1.26	304	2.03	390	1.95	600	1.44
22	hand	1	1	funzione	0	753	185	8	273	1.33	274	1.97	414	1.34	420	1.64	341	1.89	465	1.86	592	1.5
22	mouth	1	2	gallo	0	884	12	5	700	0	695	0.23	486	1.74	215	0.75	600	1.39	112	0.54	212	1.48
22	hand	1	2	giraffa	0	830	1	7	681	0.49	674	0.69	463	2.39	181	0.54	644	1.42	106	0.24	306	1.78
22	hand	1	3	giuramento	0	1067	13	10	309	1.5	344	1.91	393	1.44	400	1.12	417	1.76	400	1.9	553	1.21
22	mouth	1	3	impulso	0	983	50	7	300	1.63	300	1.89	437	1.92	452	1.28	338	1.84	506	1	463	1.56
22	hand	1	1	indiscrezione	0	1477	16	13	188	0.99	191	1.16	395	1.9	556	1.15	303	1.71	562	1.26	616	1.49
22	hand	1	1	inefficienza	1		17	12	245	1.3	274	1.56	418	1.87	521	1.14	345	1.88	515	1.69	563	1.71
22	hand	1	1	inesperienza	0	1133	5	12	232	1.19	220	1.42	427	1.83	458	1.32	355	1.77	550	1.48	556	1.54
22	mouth	1	1	insufficienza	0	1427	15	13	265	1.67	230	1.55	416	2.03	363	1.2	388	2.09	526	1.42	503	1.49
22	mouth	1	3	ira	0	903	45	3	296	1.43	391	1.98	395	2.07	400	1.21	382	1.71	474	1.42	491	1.55
22	mouth	1	1	logica	0	899	107	6	220	1.42	195	1.43	536	1.38	435	1.42	362	1.92	559	1.33	580	1.76
22	mouth	1	1	merito	0	1103	141	6	232	1.38	235	1.67	489	1.41	352	1.23	382	1.82	556	1.5	450	1.81
22	mouth	1	2	minerale	0	874	9	8	627	0.88	538	1.46	447	1.71	396	1	505	2.09	174	1.08	388	1.26
22	mouth	1	2	oca	0	948	29	3	685	0.54	700	0	468	2.21	150	0.52	659	1.08	106	0.24	197	1.33
22	mouth	1	3	orrore	0	913	77	6	305	1.29	356	1.74	491	1.78	400	1.38	475	1.8	450	1.71	363	1.71
22	hand	1	1	ozio	0	678	9	4	268	1.43	384	1.91	445	1.99	450	1.33	494	1.69	480	1.79	568	0.95
22	hand	1	2	palude	0	1348	12	6	645	0.77	613	1.13	332	1.93	341	0.95	578	1.65	175	0.9	310	2.05
22	hand	1	3	pericolo	0	645	250	8	323	1.5	361	1.85	511	1.85	231	0.7	506	1.77	394	1.37	397	1.51
22	mouth	1	1	reputazione	1		27	11	215	1.01	213	1.39	411	1.76	569	0.95	282	1.85	594	1.2	619	1
22	mouth	1	3	stupore	0	816	62	7	339	1.61	440	1.68	515	1.37	366	1.18	422	1.83	496	1.55	500	1.69
22	hand	1	2	telegrafo	0	1343	3	9	614	1.46	556	1.44	321	1.75	438	1.28	455	2.35	153	1.24	531	1.25
22	hand	1	1	tendenza	0	1136	161	8	169	0.87	184	1.12	455	1.9	530	1.69	294	1.76	591	1.4	604	1.06
22	hand	1	3	terrore	0	963	96	7	297	1.38	408	1.87	421	1.93	326	1.08	488	1.71	455	1.7	463	2.11
22	hand	1	2	torre	0	820	44	5	656	0.63	674	0.45	423	2.02	245	0.89	579	1.63	129	0.76	228	1.59
22	hand	1	3	tradimento	0	870	73	10	363	1.2	300	1.83	464	2.05	415	1.18	485	1.88	418	1.49	432	2.04
22	hand	1	2	trattore	0	858	2	8	685	0.44	672	0.74	482	2.11	209	0.75	669	0.6	105	0.22	216	1.68
22	mouth	1	1	unanimità	0	1424	37	8	241	1.46	308	2.1	306	1.6	512	1.25	369	1.62	545	1.73	632	1.11
23	mouth	1	3	abbandono	0	787	91	9	297	1.55	300	1.73	397	1.79	374	1.52	413	1.71	455	1.93	505	1.65
23	mouth	1	1	affermazione	0	1087	59	12	274	1.85	265	1.76	516	1.38	424	1.09	376	1.86	375	1.61	425	1.56
23	hand	1	3	agitazione	0	753	25	10	413	1.5	311	1.56	541	1.75	320	1.44	497	1.82	441	1.54	364	2.04
23	hand	1	3	agonia	0	1170	29	6	294	1.39	332	1.6	305	1.42	480	1.51	444	1.99	476	1.69	600	1.32
23	hand	1	2	alghe	0	767	24	5	669	0.62	657	0.73	422	1.93	269	0.6	641	1.48	121	0.54	225	1.34
23	mouth	1	2	alveare	0	776	11	7	679	0.42	674	0.57	421	2.32	267	1.02	609	1.44	150	0.73	363	1.74
23	hand	1	1	analogia	0	674	8	8	206	1.34	327	1.79	418	1.55	539	0.95	313	2.1	517	1.55	620	1.2
23	mouth	1	2	canoa	0	828	25	5	679	0.59	688	0.33	440	2.13	335	1.18	600	1.14	114	0.36	288	1.57
23	hand	1	2	circo	0	549	43	5	616	1.16	660	0.74	453	1.83	228	0.63	626	0.92	179	0.88	205	1
23	hand	1	1	circostanza	0	752	70	11	273	1.7	228	1.49	412	1.73	479	1.23	331	2.09	485	1.31	642	0.61
23	mouth	1	1	concetto	0	876	118	8	168	0.99	224	1.5	509	1.69	426	0.92	315	2.06	635	1.3	544	1.71
23	mouth	1	3	conflitto	0	724	140	9	304	1.25	348	1.81	416	2.19	444	1.15	432	1.87	424	1.1	553	1.39
23	hand	1	2	cravatta	0	658	38	8	694	0.24	688	0.44	552	1.87	250	0.93	675	0.58	105	0.22	200	1.2
23	mouth	1	3	disperazione	0	1123	101	12	311	1.55	428	1.74	505	1.61	389	1.35	501	1.86	459	1.43	427	1.96
23	mouth	1	2	elefante	0	936	36	8	669	0.6	695	0.23	482	1.77	210	0.79	618	1.45	100	0	296	1.9
23	hand	1	3	emergenza	0	751	161	9	315	1.64	348	1.9	500	1.6	400	1.21	474	1.88	456	1.37	509	1.42
23	mouth	1	2	falce	0	768	5	5	662	0.82	632	1.3	387	1.85	365	1.04	575	1.7	129	0.56	288	1.32
23	mouth	1	3	fallimento	0	846	99	10	344	1.59	263	1.74	455	1.8	420	1.28	400	1.94	450	1.69	520	1.85
23	mouth	1	1	fascino	0	913	149	7	246	1.56	430	1.33	495	1.75	475	1.18	476	1.83	535	1.28	550	1.44
23	mouth	1	2	flotta	0	1249	35	6	600	1.2	644	0.75	442	1.71	330	0.95	582	1.66	163	0.72	375	1.9
23	hand	1	3	fremito	0	978	11	7	335	1.79	312	1.84	273	1.33	516	1.26	304	2.03	390	1.95	600	1.44
23	hand	1	1	funzione	0	718	185	8	273	1.33	274	1.97	414	1.34	420	1.64	341	1.89	465	1.86	592	1.5
23	mouth	1	2	gallo	0	920	12	5	700	0	695	0.23	486	1.74	215	0.75	600	1.39	112	0.54	212	1.48
23	hand	1	2	giraffa	0	740	1	7	681	0.49	674	0.69	463	2.39	181	0.54	644	1.42	106	0.24	306	1.78
23	hand	1	3	giuramento	0	777	13	10	309	1.5	344	1.91	393	1.44	400	1.12	417	1.76	400	1.9	553	1.21
23	mouth	1	3	impulso	0	830	50	7	300	1.63	300	1.89	437	1.92	452	1.28	338	1.84	506	1	463	1.56
23	hand	1	1	indiscrezione	0	958	16	13	188	0.99	191	1.16	395	1.9	556	1.15	303	1.71	562	1.26	616	1.49
23	hand	1	1	inefficienza	0	1085	17	12	245	1.3	274	1.56	418	1.87	521	1.14	345	1.88	515	1.69	563	1.71
23	hand	1	1	inesperienza	0	867	5	12	232	1.19	220	1.42	427	1.83	458	1.32	355	1.77	550	1.48	556	1.54
23	mouth	1	1	insufficienza	0	649	15	13	265	1.67	230	1.55	416	2.03	363	1.2	388	2.09	526	1.42	503	1.49
23	mouth	1	3	ira	0	1062	45	3	296	1.43	391	1.98	395	2.07	400	1.21	382	1.71	474	1.42	491	1.55
23	mouth	1	1	logica	0	878	107	6	220	1.42	195	1.43	536	1.38	435	1.42	362	1.92	559	1.33	580	1.76
23	mouth	1	1	merito	0	774	141	6	232	1.38	235	1.67	489	1.41	352	1.23	382	1.82	556	1.5	450	1.81
23	mouth	1	2	minerale	0	650	9	8	627	0.88	538	1.46	447	1.71	396	1	505	2.09	174	1.08	388	1.26
23	mouth	1	2	oca	0	873	29	3	685	0.54	700	0	468	2.21	150	0.52	659	1.08	106	0.24	197	1.33
23	mouth	1	3	orrore	0	949	77	6	305	1.29	356	1.74	491	1.78	400	1.38	475	1.8	450	1.71	363	1.71
23	hand	1	1	ozio	0	580	9	4	268	1.43	384	1.91	445	1.99	450	1.33	494	1.69	480	1.79	568	0.95
23	hand	1	2	palude	0	865	12	6	645	0.77	613	1.13	332	1.93	341	0.95	578	1.65	175	0.9	310	2.05
23	hand	1	3	pericolo	0	736	250	8	323	1.5	361	1.85	511	1.85	231	0.7	506	1.77	394	1.37	397	1.51
23	mouth	1	1	reputazione	0	635	27	11	215	1.01	213	1.39	411	1.76	569	0.95	282	1.85	594	1.2	619	1
23	mouth	1	3	stupore	0	751	62	7	339	1.61	440	1.68	515	1.37	366	1.18	422	1.83	496	1.55	500	1.69
23	hand	1	2	telegrafo	0	715	3	9	614	1.46	556	1.44	321	1.75	438	1.28	455	2.35	153	1.24	531	1.25
23	hand	1	1	tendenza	0	700	161	8	169	0.87	184	1.12	455	1.9	530	1.69	294	1.76	591	1.4	604	1.06
23	hand	1	3	terrore	0	654	96	7	297	1.38	408	1.87	421	1.93	326	1.08	488	1.71	455	1.7	463	2.11
23	hand	1	2	torre	0	586	44	5	656	0.63	674	0.45	423	2.02	245	0.89	579	1.63	129	0.76	228	1.59
23	hand	1	3	tradimento	0	731	73	10	363	1.2	300	1.83	464	2.05	415	1.18	485	1.88	418	1.49	432	2.04
23	hand	1	2	trattore	0	810	2	8	685	0.44	672	0.74	482	2.11	209	0.75	669	0.6	105	0.22	216	1.68
23	mouth	1	1	unanimità	0	1203	37	8	241	1.46	308	2.1	306	1.6	512	1.25	369	1.62	545	1.73	632	1.11
24	mouth	1	3	abbandono	0	698	91	9	297	1.55	300	1.73	397	1.79	374	1.52	413	1.71	455	1.93	505	1.65
24	mouth	1	1	affermazione	0	697	59	12	274	1.85	265	1.76	516	1.38	424	1.09	376	1.86	375	1.61	425	1.56
24	hand	1	3	agitazione	0	672	25	10	413	1.5	311	1.56	541	1.75	320	1.44	497	1.82	441	1.54	364	2.04
24	hand	1	3	agonia	0	730	29	6	294	1.39	332	1.6	305	1.42	480	1.51	444	1.99	476	1.69	600	1.32
24	hand	1	2	alghe	0	805	24	5	669	0.62	657	0.73	422	1.93	269	0.6	641	1.48	121	0.54	225	1.34
24	mouth	1	2	alveare	0	768	11	7	679	0.42	674	0.57	421	2.32	267	1.02	609	1.44	150	0.73	363	1.74
24	hand	1	1	analogia	0	955	8	8	206	1.34	327	1.79	418	1.55	539	0.95	313	2.1	517	1.55	620	1.2
24	mouth	1	2	canoa	0	803	25	5	679	0.59	688	0.33	440	2.13	335	1.18	600	1.14	114	0.36	288	1.57
24	hand	1	2	circo	0	632	43	5	616	1.16	660	0.74	453	1.83	228	0.63	626	0.92	179	0.88	205	1
24	hand	1	1	circostanza	0	1117	70	11	273	1.7	228	1.49	412	1.73	479	1.23	331	2.09	485	1.31	642	0.61
24	mouth	1	1	concetto	0	921	118	8	168	0.99	224	1.5	509	1.69	426	0.92	315	2.06	635	1.3	544	1.71
24	mouth	1	3	conflitto	0	802	140	9	304	1.25	348	1.81	416	2.19	444	1.15	432	1.87	424	1.1	553	1.39
24	hand	1	2	cravatta	0	1004	38	8	694	0.24	688	0.44	552	1.87	250	0.93	675	0.58	105	0.22	200	1.2
24	mouth	1	3	disperazione	0	796	101	12	311	1.55	428	1.74	505	1.61	389	1.35	501	1.86	459	1.43	427	1.96
24	mouth	1	2	elefante	0	728	36	8	669	0.6	695	0.23	482	1.77	210	0.79	618	1.45	100	0	296	1.9
24	hand	1	3	emergenza	0	1006	161	9	315	1.64	348	1.9	500	1.6	400	1.21	474	1.88	456	1.37	509	1.42
24	mouth	1	2	falce	0	1050	5	5	662	0.82	632	1.3	387	1.85	365	1.04	575	1.7	129	0.56	288	1.32
24	mouth	1	3	fallimento	0	897	99	10	344	1.59	263	1.74	455	1.8	420	1.28	400	1.94	450	1.69	520	1.85
24	mouth	1	1	fascino	0	770	149	7	246	1.56	430	1.33	495	1.75	475	1.18	476	1.83	535	1.28	550	1.44
24	mouth	1	2	flotta	0	666	35	6	600	1.2	644	0.75	442	1.71	330	0.95	582	1.66	163	0.72	375	1.9
24	hand	1	3	fremito	0	727	11	7	335	1.79	312	1.84	273	1.33	516	1.26	304	2.03	390	1.95	600	1.44
24	hand	1	1	funzione	0	670	185	8	273	1.33	274	1.97	414	1.34	420	1.64	341	1.89	465	1.86	592	1.5
24	mouth	1	2	gallo	0	724	12	5	700	0	695	0.23	486	1.74	215	0.75	600	1.39	112	0.54	212	1.48
24	hand	1	2	giraffa	0	836	1	7	681	0.49	674	0.69	463	2.39	181	0.54	644	1.42	106	0.24	306	1.78
24	hand	1	3	giuramento	0	1146	13	10	309	1.5	344	1.91	393	1.44	400	1.12	417	1.76	400	1.9	553	1.21
24	mouth	1	3	impulso	0	638	50	7	300	1.63	300	1.89	437	1.92	452	1.28	338	1.84	506	1	463	1.56
24	hand	1	1	indiscrezione	0	1182	16	13	188	0.99	191	1.16	395	1.9	556	1.15	303	1.71	562	1.26	616	1.49
24	hand	1	1	inefficienza	0	1315	17	12	245	1.3	274	1.56	418	1.87	521	1.14	345	1.88	515	1.69	563	1.71
24	hand	1	1	inesperienza	0	1108	5	12	232	1.19	220	1.42	427	1.83	458	1.32	355	1.77	550	1.48	556	1.54
24	mouth	1	1	insufficienza	0	1087	15	13	265	1.67	230	1.55	416	2.03	363	1.2	388	2.09	526	1.42	503	1.49
24	mouth	1	3	ira	0	770	45	3	296	1.43	391	1.98	395	2.07	400	1.21	382	1.71	474	1.42	491	1.55
24	mouth	1	1	logica	0	756	107	6	220	1.42	195	1.43	536	1.38	435	1.42	362	1.92	559	1.33	580	1.76
24	mouth	1	1	merito	0	668	141	6	232	1.38	235	1.67	489	1.41	352	1.23	382	1.82	556	1.5	450	1.81
24	mouth	1	2	minerale	0	718	9	8	627	0.88	538	1.46	447	1.71	396	1	505	2.09	174	1.08	388	1.26
24	mouth	1	2	oca	0	544	29	3	685	0.54	700	0	468	2.21	150	0.52	659	1.08	106	0.24	197	1.33
24	mouth	1	3	orrore	0	607	77	6	305	1.29	356	1.74	491	1.78	400	1.38	475	1.8	450	1.71	363	1.71
24	hand	1	1	ozio	0	699	9	4	268	1.43	384	1.91	445	1.99	450	1.33	494	1.69	480	1.79	568	0.95
24	hand	1	2	palude	0	810	12	6	645	0.77	613	1.13	332	1.93	341	0.95	578	1.65	175	0.9	310	2.05
24	hand	1	3	pericolo	0	734	250	8	323	1.5	361	1.85	511	1.85	231	0.7	506	1.77	394	1.37	397	1.51
24	mouth	1	1	reputazione	0	746	27	11	215	1.01	213	1.39	411	1.76	569	0.95	282	1.85	594	1.2	619	1
24	mouth	1	3	stupore	0	642	62	7	339	1.61	440	1.68	515	1.37	366	1.18	422	1.83	496	1.55	500	1.69
24	hand	1	2	telegrafo	0	710	3	9	614	1.46	556	1.44	321	1.75	438	1.28	455	2.35	153	1.24	531	1.25
24	hand	1	1	tendenza	0	611	161	8	169	0.87	184	1.12	455	1.9	530	1.69	294	1.76	591	1.4	604	1.06
24	hand	1	3	terrore	0	771	96	7	297	1.38	408	1.87	421	1.93	326	1.08	488	1.71	455	1.7	463	2.11
24	hand	1	2	torre	0	750	44	5	656	0.63	674	0.45	423	2.02	245	0.89	579	1.63	129	0.76	228	1.59
24	hand	1	3	tradimento	0	759	73	10	363	1.2	300	1.83	464	2.05	415	1.18	485	1.88	418	1.49	432	2.04
24	hand	1	2	trattore	0	1100	2	8	685	0.44	672	0.74	482	2.11	209	0.75	669	0.6	105	0.22	216	1.68
24	mouth	1	1	unanimità	0	1021	37	8	241	1.46	308	2.1	306	1.6	512	1.25	369	1.62	545	1.73	632	1.11
25	hand	1	3	abbandono	0	730	91	9	297	1.55	300	1.73	397	1.79	374	1.52	413	1.71	455	1.93	505	1.65
25	hand	1	1	affermazione	0	865	59	12	274	1.85	265	1.76	516	1.38	424	1.09	376	1.86	375	1.61	425	1.56
25	mouth	1	3	agitazione	0	1007	25	10	413	1.5	311	1.56	541	1.75	320	1.44	497	1.82	441	1.54	364	2.04
25	mouth	1	3	agonia	0	779	29	6	294	1.39	332	1.6	305	1.42	480	1.51	444	1.99	476	1.69	600	1.32
25	mouth	1	2	alghe	0	621	24	5	669	0.62	657	0.73	422	1.93	269	0.6	641	1.48	121	0.54	225	1.34
25	hand	1	2	alveare	0	763	11	7	679	0.42	674	0.57	421	2.32	267	1.02	609	1.44	150	0.73	363	1.74
25	mouth	1	1	analogia	0	630	8	8	206	1.34	327	1.79	418	1.55	539	0.95	313	2.1	517	1.55	620	1.2
25	hand	1	2	canoa	0	951	25	5	679	0.59	688	0.33	440	2.13	335	1.18	600	1.14	114	0.36	288	1.57
25	mouth	1	2	circo	0	853	43	5	616	1.16	660	0.74	453	1.83	228	0.63	626	0.92	179	0.88	205	1
25	mouth	1	1	circostanza	0	666	70	11	273	1.7	228	1.49	412	1.73	479	1.23	331	2.09	485	1.31	642	0.61
25	hand	1	1	concetto	0	1047	118	8	168	0.99	224	1.5	509	1.69	426	0.92	315	2.06	635	1.3	544	1.71
25	hand	1	3	conflitto	0	1098	140	9	304	1.25	348	1.81	416	2.19	444	1.15	432	1.87	424	1.1	553	1.39
25	mouth	1	2	cravatta	0	772	38	8	694	0.24	688	0.44	552	1.87	250	0.93	675	0.58	105	0.22	200	1.2
25	hand	1	3	disperazione	0	1000	101	12	311	1.55	428	1.74	505	1.61	389	1.35	501	1.86	459	1.43	427	1.96
25	hand	1	2	elefante	0	566	36	8	669	0.6	695	0.23	482	1.77	210	0.79	618	1.45	100	0	296	1.9
25	mouth	1	3	emergenza	0	661	161	9	315	1.64	348	1.9	500	1.6	400	1.21	474	1.88	456	1.37	509	1.42
25	hand	1	2	falce	0	746	5	5	662	0.82	632	1.3	387	1.85	365	1.04	575	1.7	129	0.56	288	1.32
25	hand	1	3	fallimento	0	987	99	10	344	1.59	263	1.74	455	1.8	420	1.28	400	1.94	450	1.69	520	1.85
25	hand	1	1	fascino	0	750	149	7	246	1.56	430	1.33	495	1.75	475	1.18	476	1.83	535	1.28	550	1.44
25	hand	1	2	flotta	0	638	35	6	600	1.2	644	0.75	442	1.71	330	0.95	582	1.66	163	0.72	375	1.9
25	mouth	1	3	fremito	0	862	11	7	335	1.79	312	1.84	273	1.33	516	1.26	304	2.03	390	1.95	600	1.44
25	mouth	1	1	funzione	0	663	185	8	273	1.33	274	1.97	414	1.34	420	1.64	341	1.89	465	1.86	592	1.5
25	hand	1	2	gallo	0	632	12	5	700	0	695	0.23	486	1.74	215	0.75	600	1.39	112	0.54	212	1.48
25	mouth	1	2	giraffa	0	753	1	7	681	0.49	674	0.69	463	2.39	181	0.54	644	1.42	106	0.24	306	1.78
25	mouth	1	3	giuramento	0	702	13	10	309	1.5	344	1.91	393	1.44	400	1.12	417	1.76	400	1.9	553	1.21
25	hand	1	3	impulso	0	681	50	7	300	1.63	300	1.89	437	1.92	452	1.28	338	1.84	506	1	463	1.56
25	mouth	1	1	indiscrezione	0	821	16	13	188	0.99	191	1.16	395	1.9	556	1.15	303	1.71	562	1.26	616	1.49
25	mouth	1	1	inefficienza	0	683	17	12	245	1.3	274	1.56	418	1.87	521	1.14	345	1.88	515	1.69	563	1.71
25	mouth	1	1	inesperienza	0	873	5	12	232	1.19	220	1.42	427	1.83	458	1.32	355	1.77	550	1.48	556	1.54
25	hand	1	1	insufficienza	0	1040	15	13	265	1.67	230	1.55	416	2.03	363	1.2	388	2.09	526	1.42	503	1.49
25	hand	1	3	ira	0	675	45	3	296	1.43	391	1.98	395	2.07	400	1.21	382	1.71	474	1.42	491	1.55
25	hand	1	1	logica	0	831	107	6	220	1.42	195	1.43	536	1.38	435	1.42	362	1.92	559	1.33	580	1.76
25	hand	1	1	merito	0	738	141	6	232	1.38	235	1.67	489	1.41	352	1.23	382	1.82	556	1.5	450	1.81
25	hand	1	2	minerale	0	617	9	8	627	0.88	538	1.46	447	1.71	396	1	505	2.09	174	1.08	388	1.26
25	hand	1	2	oca	0	770	29	3	685	0.54	700	0	468	2.21	150	0.52	659	1.08	106	0.24	197	1.33
25	hand	1	3	orrore	0	581	77	6	305	1.29	356	1.74	491	1.78	400	1.38	475	1.8	450	1.71	363	1.71
25	mouth	1	1	ozio	0	688	9	4	268	1.43	384	1.91	445	1.99	450	1.33	494	1.69	480	1.79	568	0.95
25	mouth	1	2	palude	0	630	12	6	645	0.77	613	1.13	332	1.93	341	0.95	578	1.65	175	0.9	310	2.05
25	mouth	1	3	pericolo	0	592	250	8	323	1.5	361	1.85	511	1.85	231	0.7	506	1.77	394	1.37	397	1.51
25	hand	1	1	reputazione	0	705	27	11	215	1.01	213	1.39	411	1.76	569	0.95	282	1.85	594	1.2	619	1
25	hand	1	3	stupore	0	661	62	7	339	1.61	440	1.68	515	1.37	366	1.18	422	1.83	496	1.55	500	1.69
25	mouth	1	2	telegrafo	0	578	3	9	614	1.46	556	1.44	321	1.75	438	1.28	455	2.35	153	1.24	531	1.25
25	mouth	1	1	tendenza	0	598	161	8	169	0.87	184	1.12	455	1.9	530	1.69	294	1.76	591	1.4	604	1.06
25	mouth	1	3	terrore	0	702	96	7	297	1.38	408	1.87	421	1.93	326	1.08	488	1.71	455	1.7	463	2.11
25	mouth	1	2	torre	0	660	44	5	656	0.63	674	0.45	423	2.02	245	0.89	579	1.63	129	0.76	228	1.59
25	mouth	1	3	tradimento	0	605	73	10	363	1.2	300	1.83	464	2.05	415	1.18	485	1.88	418	1.49	432	2.04
25	mouth	1	2	trattore	0	773	2	8	685	0.44	672	0.74	482	2.11	209	0.75	669	0.6	105	0.22	216	1.68
25	hand	1	1	unanimità	0	1234	37	8	241	1.46	308	2.1	306	1.6	512	1.25	369	1.62	545	1.73	632	1.11
26	hand	1	3	abbandono	0	734	91	9	297	1.55	300	1.73	397	1.79	374	1.52	413	1.71	455	1.93	505	1.65
26	hand	1	1	affermazione	0	1036	59	12	274	1.85	265	1.76	516	1.38	424	1.09	376	1.86	375	1.61	425	1.56
26	mouth	1	3	agitazione	0	943	25	10	413	1.5	311	1.56	541	1.75	320	1.44	497	1.82	441	1.54	364	2.04
26	mouth	1	3	agonia	0	929	29	6	294	1.39	332	1.6	305	1.42	480	1.51	444	1.99	476	1.69	600	1.32
26	mouth	1	2	alghe	0	1227	24	5	669	0.62	657	0.73	422	1.93	269	0.6	641	1.48	121	0.54	225	1.34
26	hand	1	2	alveare	0	910	11	7	679	0.42	674	0.57	421	2.32	267	1.02	609	1.44	150	0.73	363	1.74
26	mouth	1	1	analogia	0	922	8	8	206	1.34	327	1.79	418	1.55	539	0.95	313	2.1	517	1.55	620	1.2
26	hand	1	2	canoa	0	1016	25	5	679	0.59	688	0.33	440	2.13	335	1.18	600	1.14	114	0.36	288	1.57
26	mouth	1	2	circo	0	809	43	5	616	1.16	660	0.74	453	1.83	228	0.63	626	0.92	179	0.88	205	1
26	mouth	1	1	circostanza	0	1496	70	11	273	1.7	228	1.49	412	1.73	479	1.23	331	2.09	485	1.31	642	0.61
26	hand	1	1	concetto	0	846	118	8	168	0.99	224	1.5	509	1.69	426	0.92	315	2.06	635	1.3	544	1.71
26	hand	1	3	conflitto	0	758	140	9	304	1.25	348	1.81	416	2.19	444	1.15	432	1.87	424	1.1	553	1.39
26	mouth	1	2	cravatta	0	890	38	8	694	0.24	688	0.44	552	1.87	250	0.93	675	0.58	105	0.22	200	1.2
26	hand	1	3	disperazione	0	980	101	12	311	1.55	428	1.74	505	1.61	389	1.35	501	1.86	459	1.43	427	1.96
26	hand	1	2	elefante	0	1118	36	8	669	0.6	695	0.23	482	1.77	210	0.79	618	1.45	100	0	296	1.9
26	mouth	1	3	emergenza	0	751	161	9	315	1.64	348	1.9	500	1.6	400	1.21	474	1.88	456	1.37	509	1.42
26	hand	1	2	falce	0	999	5	5	662	0.82	632	1.3	387	1.85	365	1.04	575	1.7	129	0.56	288	1.32
26	hand	1	3	fallimento	0	1041	99	10	344	1.59	263	1.74	455	1.8	420	1.28	400	1.94	450	1.69	520	1.85
26	hand	1	1	fascino	0	962	149	7	246	1.56	430	1.33	495	1.75	475	1.18	476	1.83	535	1.28	550	1.44
26	hand	1	2	flotta	0	1110	35	6	600	1.2	644	0.75	442	1.71	330	0.95	582	1.66	163	0.72	375	1.9
26	mouth	1	3	fremito	0	1396	11	7	335	1.79	312	1.84	273	1.33	516	1.26	304	2.03	390	1.95	600	1.44
26	mouth	1	1	funzione	0	1006	185	8	273	1.33	274	1.97	414	1.34	420	1.64	341	1.89	465	1.86	592	1.5
26	hand	1	2	gallo	0	746	12	5	700	0	695	0.23	486	1.74	215	0.75	600	1.39	112	0.54	212	1.48
26	mouth	1	2	giraffa	0	920	1	7	681	0.49	674	0.69	463	2.39	181	0.54	644	1.42	106	0.24	306	1.78
26	mouth	1	3	giuramento	0	854	13	10	309	1.5	344	1.91	393	1.44	400	1.12	417	1.76	400	1.9	553	1.21
26	hand	1	3	impulso	0	680	50	7	300	1.63	300	1.89	437	1.92	452	1.28	338	1.84	506	1	463	1.56
26	mouth	1	1	indiscrezione	0	1197	16	13	188	0.99	191	1.16	395	1.9	556	1.15	303	1.71	562	1.26	616	1.49
26	mouth	1	1	inefficienza	0	1296	17	12	245	1.3	274	1.56	418	1.87	521	1.14	345	1.88	515	1.69	563	1.71
26	mouth	1	1	inesperienza	0	1297	5	12	232	1.19	220	1.42	427	1.83	458	1.32	355	1.77	550	1.48	556	1.54
26	hand	1	1	insufficienza	0	1179	15	13	265	1.67	230	1.55	416	2.03	363	1.2	388	2.09	526	1.42	503	1.49
26	hand	1	3	ira	0	714	45	3	296	1.43	391	1.98	395	2.07	400	1.21	382	1.71	474	1.42	491	1.55
26	hand	1	1	logica	0	667	107	6	220	1.42	195	1.43	536	1.38	435	1.42	362	1.92	559	1.33	580	1.76
26	hand	1	1	merito	0	743	141	6	232	1.38	235	1.67	489	1.41	352	1.23	382	1.82	556	1.5	450	1.81
26	hand	1	2	minerale	0	937	9	8	627	0.88	538	1.46	447	1.71	396	1	505	2.09	174	1.08	388	1.26
26	hand	1	2	oca	0	590	29	3	685	0.54	700	0	468	2.21	150	0.52	659	1.08	106	0.24	197	1.33
26	hand	1	3	orrore	0	773	77	6	305	1.29	356	1.74	491	1.78	400	1.38	475	1.8	450	1.71	363	1.71
26	mouth	1	1	ozio	0	713	9	4	268	1.43	384	1.91	445	1.99	450	1.33	494	1.69	480	1.79	568	0.95
26	mouth	1	2	palude	0	962	12	6	645	0.77	613	1.13	332	1.93	341	0.95	578	1.65	175	0.9	310	2.05
26	mouth	1	3	pericolo	0	866	250	8	323	1.5	361	1.85	511	1.85	231	0.7	506	1.77	394	1.37	397	1.51
26	hand	1	1	reputazione	0	982	27	11	215	1.01	213	1.39	411	1.76	569	0.95	282	1.85	594	1.2	619	1
26	hand	1	3	stupore	0	808	62	7	339	1.61	440	1.68	515	1.37	366	1.18	422	1.83	496	1.55	500	1.69
26	mouth	1	2	telegrafo	0	731	3	9	614	1.46	556	1.44	321	1.75	438	1.28	455	2.35	153	1.24	531	1.25
26	mouth	1	1	tendenza	0	775	161	8	169	0.87	184	1.12	455	1.9	530	1.69	294	1.76	591	1.4	604	1.06
26	mouth	1	3	terrore	0	964	96	7	297	1.38	408	1.87	421	1.93	326	1.08	488	1.71	455	1.7	463	2.11
26	mouth	1	2	torre	0	700	44	5	656	0.63	674	0.45	423	2.02	245	0.89	579	1.63	129	0.76	228	1.59
26	mouth	1	3	tradimento	0	776	73	10	363	1.2	300	1.83	464	2.05	415	1.18	485	1.88	418	1.49	432	2.04
26	mouth	1	2	trattore	0	887	2	8	685	0.44	672	0.74	482	2.11	209	0.75	669	0.6	105	0.22	216	1.68
26	hand	1	1	unanimità	1		37	8	241	1.46	308	2.1	306	1.6	512	1.25	369	1.62	545	1.73	632	1.11
27	mouth	1	3	abbandono	0	1016	91	9	297	1.55	300	1.73	397	1.79	374	1.52	413	1.71	455	1.93	505	1.65
27	mouth	1	1	affermazione	0	1088	59	12	274	1.85	265	1.76	516	1.38	424	1.09	376	1.86	375	1.61	425	1.56
27	hand	1	3	agitazione	0	765	25	10	413	1.5	311	1.56	541	1.75	320	1.44	497	1.82	441	1.54	364	2.04
27	hand	1	3	agonia	0	857	29	6	294	1.39	332	1.6	305	1.42	480	1.51	444	1.99	476	1.69	600	1.32
27	hand	1	2	alghe	0	713	24	5	669	0.62	657	0.73	422	1.93	269	0.6	641	1.48	121	0.54	225	1.34
27	mouth	1	2	alveare	0	908	11	7	679	0.42	674	0.57	421	2.32	267	1.02	609	1.44	150	0.73	363	1.74
27	hand	1	1	analogia	1		8	8	206	1.34	327	1.79	418	1.55	539	0.95	313	2.1	517	1.55	620	1.2
27	mouth	1	2	canoa	0	968	25	5	679	0.59	688	0.33	440	2.13	335	1.18	600	1.14	114	0.36	288	1.57
27	hand	1	2	circo	0	990	43	5	616	1.16	660	0.74	453	1.83	228	0.63	626	0.92	179	0.88	205	1
27	hand	1	1	circostanza	0	1348	70	11	273	1.7	228	1.49	412	1.73	479	1.23	331	2.09	485	1.31	642	0.61
27	mouth	1	1	concetto	0	786	118	8	168	0.99	224	1.5	509	1.69	426	0.92	315	2.06	635	1.3	544	1.71
27	mouth	1	3	conflitto	0	1075	140	9	304	1.25	348	1.81	416	2.19	444	1.15	432	1.87	424	1.1	553	1.39
27	hand	1	2	cravatta	0	927	38	8	694	0.24	688	0.44	552	1.87	250	0.93	675	0.58	105	0.22	200	1.2
27	mouth	1	3	disperazione	0	1193	101	12	311	1.55	428	1.74	505	1.61	389	1.35	501	1.86	459	1.43	427	1.96
27	mouth	1	2	elefante	0	790	36	8	669	0.6	695	0.23	482	1.77	210	0.79	618	1.45	100	0	296	1.9
27	hand	1	3	emergenza	0	866	161	9	315	1.64	348	1.9	500	1.6	400	1.21	474	1.88	456	1.37	509	1.42
27	mouth	1	2	falce	0	1313	5	5	662	0.82	632	1.3	387	1.85	365	1.04	575	1.7	129	0.56	288	1.32
27	mouth	1	3	fallimento	0	817	99	10	344	1.59	263	1.74	455	1.8	420	1.28	400	1.94	450	1.69	520	1.85
27	mouth	1	1	fascino	0	882	149	7	246	1.56	430	1.33	495	1.75	475	1.18	476	1.83	535	1.28	550	1.44
27	mouth	1	2	flotta	0	1016	35	6	600	1.2	644	0.75	442	1.71	330	0.95	582	1.66	163	0.72	375	1.9
27	hand	1	3	fremito	1		11	7	335	1.79	312	1.84	273	1.33	516	1.26	304	2.03	390	1.95	600	1.44
27	hand	1	1	funzione	0	1066	185	8	273	1.33	274	1.97	414	1.34	420	1.64	341	1.89	465	1.86	592	1.5
27	mouth	1	2	gallo	0	914	12	5	700	0	695	0.23	486	1.74	215	0.75	600	1.39	112	0.54	212	1.48
27	hand	1	2	giraffa	0	886	1	7	681	0.49	674	0.69	463	2.39	181	0.54	644	1.42	106	0.24	306	1.78
27	hand	1	3	giuramento	0	1158	13	10	309	1.5	344	1.91	393	1.44	400	1.12	417	1.76	400	1.9	553	1.21
27	mouth	1	3	impulso	0	748	50	7	300	1.63	300	1.89	437	1.92	452	1.28	338	1.84	506	1	463	1.56
27	hand	1	1	indiscrezione	0	938	16	13	188	0.99	191	1.16	395	1.9	556	1.15	303	1.71	562	1.26	616	1.49
27	hand	1	1	inefficienza	0	848	17	12	245	1.3	274	1.56	418	1.87	521	1.14	345	1.88	515	1.69	563	1.71
27	hand	1	1	inesperienza	0	1228	5	12	232	1.19	220	1.42	427	1.83	458	1.32	355	1.77	550	1.48	556	1.54
27	mouth	1	1	insufficienza	0	802	15	13	265	1.67	230	1.55	416	2.03	363	1.2	388	2.09	526	1.42	503	1.49
27	mouth	1	3	ira	0	916	45	3	296	1.43	391	1.98	395	2.07	400	1.21	382	1.71	474	1.42	491	1.55
27	mouth	1	1	logica	0	655	107	6	220	1.42	195	1.43	536	1.38	435	1.42	362	1.92	559	1.33	580	1.76
27	mouth	1	1	merito	0	810	141	6	232	1.38	235	1.67	489	1.41	352	1.23	382	1.82	556	1.5	450	1.81
27	mouth	1	2	minerale	0	815	9	8	627	0.88	538	1.46	447	1.71	396	1	505	2.09	174	1.08	388	1.26
27	mouth	1	2	oca	0	740	29	3	685	0.54	700	0	468	2.21	150	0.52	659	1.08	106	0.24	197	1.33
27	mouth	1	3	orrore	0	884	77	6	305	1.29	356	1.74	491	1.78	400	1.38	475	1.8	450	1.71	363	1.71
27	hand	1	1	ozio	0	771	9	4	268	1.43	384	1.91	445	1.99	450	1.33	494	1.69	480	1.79	568	0.95
27	hand	1	2	palude	0	856	12	6	645	0.77	613	1.13	332	1.93	341	0.95	578	1.65	175	0.9	310	2.05
27	hand	1	3	pericolo	0	769	250	8	323	1.5	361	1.85	511	1.85	231	0.7	506	1.77	394	1.37	397	1.51
27	mouth	1	1	reputazione	0	1125	27	11	215	1.01	213	1.39	411	1.76	569	0.95	282	1.85	594	1.2	619	1
27	mouth	1	3	stupore	1		62	7	339	1.61	440	1.68	515	1.37	366	1.18	422	1.83	496	1.55	500	1.69
27	hand	1	2	telegrafo	0	702	3	9	614	1.46	556	1.44	321	1.75	438	1.28	455	2.35	153	1.24	531	1.25
27	hand	1	1	tendenza	0	1088	161	8	169	0.87	184	1.12	455	1.9	530	1.69	294	1.76	591	1.4	604	1.06
27	hand	1	3	terrore	0	758	96	7	297	1.38	408	1.87	421	1.93	326	1.08	488	1.71	455	1.7	463	2.11
27	hand	1	2	torre	0	1137	44	5	656	0.63	674	0.45	423	2.02	245	0.89	579	1.63	129	0.76	228	1.59
27	hand	1	3	tradimento	0	871	73	10	363	1.2	300	1.83	464	2.05	415	1.18	485	1.88	418	1.49	432	2.04
27	hand	1	2	trattore	0	798	2	8	685	0.44	672	0.74	482	2.11	209	0.75	669	0.6	105	0.22	216	1.68
27	mouth	1	1	unanimità	1		37	8	241	1.46	308	2.1	306	1.6	512	1.25	369	1.62	545	1.73	632	1.11
28	mouth	1	3	abbandono	0	1141	91	9	297	1.55	300	1.73	397	1.79	374	1.52	413	1.71	455	1.93	505	1.65
28	mouth	1	1	affermazione	0	898	59	12	274	1.85	265	1.76	516	1.38	424	1.09	376	1.86	375	1.61	425	1.56
28	hand	1	3	agitazione	0	699	25	10	413	1.5	311	1.56	541	1.75	320	1.44	497	1.82	441	1.54	364	2.04
28	hand	1	3	agonia	0	729	29	6	294	1.39	332	1.6	305	1.42	480	1.51	444	1.99	476	1.69	600	1.32
28	hand	1	2	alghe	0	932	24	5	669	0.62	657	0.73	422	1.93	269	0.6	641	1.48	121	0.54	225	1.34
28	mouth	1	2	alveare	0	551	11	7	679	0.42	674	0.57	421	2.32	267	1.02	609	1.44	150	0.73	363	1.74
28	hand	1	1	analogia	0	1212	8	8	206	1.34	327	1.79	418	1.55	539	0.95	313	2.1	517	1.55	620	1.2
28	mouth	1	2	canoa	0	765	25	5	679	0.59	688	0.33	440	2.13	335	1.18	600	1.14	114	0.36	288	1.57
28	hand	1	2	circo	0	834	43	5	616	1.16	660	0.74	453	1.83	228	0.63	626	0.92	179	0.88	205	1
28	hand	1	1	circostanza	0	653	70	11	273	1.7	228	1.49	412	1.73	479	1.23	331	2.09	485	1.31	642	0.61
28	mouth	1	1	concetto	0	952	118	8	168	0.99	224	1.5	509	1.69	426	0.92	315	2.06	635	1.3	544	1.71
28	mouth	1	3	conflitto	1		140	9	304	1.25	348	1.81	416	2.19	444	1.15	432	1.87	424	1.1	553	1.39
28	hand	1	2	cravatta	0	860	38	8	694	0.24	688	0.44	552	1.87	250	0.93	675	0.58	105	0.22	200	1.2
28	mouth	1	3	disperazione	1		101	12	311	1.55	428	1.74	505	1.61	389	1.35	501	1.86	459	1.43	427	1.96
28	mouth	1	2	elefante	0	1181	36	8	669	0.6	695	0.23	482	1.77	210	0.79	618	1.45	100	0	296	1.9
28	hand	1	3	emergenza	0	911	161	9	315	1.64	348	1.9	500	1.6	400	1.21	474	1.88	456	1.37	509	1.42
28	mouth	1	2	falce	0	961	5	5	662	0.82	632	1.3	387	1.85	365	1.04	575	1.7	129	0.56	288	1.32
28	mouth	1	3	fallimento	0	744	99	10	344	1.59	263	1.74	455	1.8	420	1.28	400	1.94	450	1.69	520	1.85
28	mouth	1	1	fascino	0	617	149	7	246	1.56	430	1.33	495	1.75	475	1.18	476	1.83	535	1.28	550	1.44
28	mouth	1	2	flotta	0	554	35	6	600	1.2	644	0.75	442	1.71	330	0.95	582	1.66	163	0.72	375	1.9
28	hand	1	3	fremito	1		11	7	335	1.79	312	1.84	273	1.33	516	1.26	304	2.03	390	1.95	600	1.44
28	hand	1	1	funzione	1		185	8	273	1.33	274	1.97	414	1.34	420	1.64	341	1.89	465	1.86	592	1.5
28	mouth	1	2	gallo	0	930	12	5	700	0	695	0.23	486	1.74	215	0.75	600	1.39	112	0.54	212	1.48
28	hand	1	2	giraffa	0	1034	1	7	681	0.49	674	0.69	463	2.39	181	0.54	644	1.42	106	0.24	306	1.78
28	hand	1	3	giuramento	1		13	10	309	1.5	344	1.91	393	1.44	400	1.12	417	1.76	400	1.9	553	1.21
28	mouth	1	3	impulso	0	650	50	7	300	1.63	300	1.89	437	1.92	452	1.28	338	1.84	506	1	463	1.56
28	hand	1	1	indiscrezione	0	932	16	13	188	0.99	191	1.16	395	1.9	556	1.15	303	1.71	562	1.26	616	1.49
28	hand	1	1	inefficienza	0	1118	17	12	245	1.3	274	1.56	418	1.87	521	1.14	345	1.88	515	1.69	563	1.71
28	hand	1	1	inesperienza	0	1331	5	12	232	1.19	220	1.42	427	1.83	458	1.32	355	1.77	550	1.48	556	1.54
28	mouth	1	1	insufficienza	0	645	15	13	265	1.67	230	1.55	416	2.03	363	1.2	388	2.09	526	1.42	503	1.49
28	mouth	1	3	ira	0	1193	45	3	296	1.43	391	1.98	395	2.07	400	1.21	382	1.71	474	1.42	491	1.55
28	mouth	1	1	logica	0	821	107	6	220	1.42	195	1.43	536	1.38	435	1.42	362	1.92	559	1.33	580	1.76
28	mouth	1	1	merito	0	874	141	6	232	1.38	235	1.67	489	1.41	352	1.23	382	1.82	556	1.5	450	1.81
28	mouth	1	2	minerale	0	888	9	8	627	0.88	538	1.46	447	1.71	396	1	505	2.09	174	1.08	388	1.26
28	mouth	1	2	oca	0	815	29	3	685	0.54	700	0	468	2.21	150	0.52	659	1.08	106	0.24	197	1.33
28	mouth	1	3	orrore	0	927	77	6	305	1.29	356	1.74	491	1.78	400	1.38	475	1.8	450	1.71	363	1.71
28	hand	1	1	ozio	0	1085	9	4	268	1.43	384	1.91	445	1.99	450	1.33	494	1.69	480	1.79	568	0.95
28	hand	1	2	palude	0	734	12	6	645	0.77	613	1.13	332	1.93	341	0.95	578	1.65	175	0.9	310	2.05
28	hand	1	3	pericolo	0	722	250	8	323	1.5	361	1.85	511	1.85	231	0.7	506	1.77	394	1.37	397	1.51
28	mouth	1	1	reputazione	0	883	27	11	215	1.01	213	1.39	411	1.76	569	0.95	282	1.85	594	1.2	619	1
28	mouth	1	3	stupore	0	972	62	7	339	1.61	440	1.68	515	1.37	366	1.18	422	1.83	496	1.55	500	1.69
28	hand	1	2	telegrafo	0	822	3	9	614	1.46	556	1.44	321	1.75	438	1.28	455	2.35	153	1.24	531	1.25
28	hand	1	1	tendenza	0	678	161	8	169	0.87	184	1.12	455	1.9	530	1.69	294	1.76	591	1.4	604	1.06
28	hand	1	3	terrore	0	723	96	7	297	1.38	408	1.87	421	1.93	326	1.08	488	1.71	455	1.7	463	2.11
28	hand	1	2	torre	0	1437	44	5	656	0.63	674	0.45	423	2.02	245	0.89	579	1.63	129	0.76	228	1.59
28	hand	1	3	tradimento	0	725	73	10	363	1.2	300	1.83	464	2.05	415	1.18	485	1.88	418	1.49	432	2.04
28	hand	1	2	trattore	0	753	2	8	685	0.44	672	0.74	482	2.11	209	0.75	669	0.6	105	0.22	216	1.68
28	mouth	1	1	unanimità	0	1354	37	8	241	1.46	308	2.1	306	1.6	512	1.25	369	1.62	545	1.73	632	1.11
29	hand	1	3	abbandono	0	963	91	9	297	1.55	300	1.73	397	1.79	374	1.52	413	1.71	455	1.93	505	1.65
29	hand	1	1	affermazione	0	924	59	12	274	1.85	265	1.76	516	1.38	424	1.09	376	1.86	375	1.61	425	1.56
29	mouth	1	3	agitazione	0	604	25	10	413	1.5	311	1.56	541	1.75	320	1.44	497	1.82	441	1.54	364	2.04
29	mouth	1	3	agonia	0	504	29	6	294	1.39	332	1.6	305	1.42	480	1.51	444	1.99	476	1.69	600	1.32
29	mouth	1	2	alghe	0	547	24	5	669	0.62	657	0.73	422	1.93	269	0.6	641	1.48	121	0.54	225	1.34
29	hand	1	2	alveare	1		11	7	679	0.42	674	0.57	421	2.32	267	1.02	609	1.44	150	0.73	363	1.74
29	mouth	1	1	analogia	0	727	8	8	206	1.34	327	1.79	418	1.55	539	0.95	313	2.1	517	1.55	620	1.2
29	hand	1	2	canoa	0	542	25	5	679	0.59	688	0.33	440	2.13	335	1.18	600	1.14	114	0.36	288	1.57
29	mouth	1	2	circo	0	623	43	5	616	1.16	660	0.74	453	1.83	228	0.63	626	0.92	179	0.88	205	1
29	mouth	1	1	circostanza	0	614	70	11	273	1.7	228	1.49	412	1.73	479	1.23	331	2.09	485	1.31	642	0.61
29	hand	1	1	concetto	0	636	118	8	168	0.99	224	1.5	509	1.69	426	0.92	315	2.06	635	1.3	544	1.71
29	hand	1	3	conflitto	0	579	140	9	304	1.25	348	1.81	416	2.19	444	1.15	432	1.87	424	1.1	553	1.39
29	mouth	1	2	cravatta	1		38	8	694	0.24	688	0.44	552	1.87	250	0.93	675	0.58	105	0.22	200	1.2
29	hand	1	3	disperazione	0	738	101	12	311	1.55	428	1.74	505	1.61	389	1.35	501	1.86	459	1.43	427	1.96
29	hand	1	2	elefante	0	1242	36	8	669	0.6	695	0.23	482	1.77	210	0.79	618	1.45	100	0	296	1.9
29	mouth	1	3	emergenza	0	544	161	9	315	1.64	348	1.9	500	1.6	400	1.21	474	1.88	456	1.37	509	1.42
29	hand	1	2	falce	0	594	5	5	662	0.82	632	1.3	387	1.85	365	1.04	575	1.7	129	0.56	288	1.32
29	hand	1	3	fallimento	0	535	99	10	344	1.59	263	1.74	455	1.8	420	1.28	400	1.94	450	1.69	520	1.85
29	hand	1	1	fascino	0	588	149	7	246	1.56	430	1.33	495	1.75	475	1.18	476	1.83	535	1.28	550	1.44
29	hand	1	2	flotta	0	521	35	6	600	1.2	644	0.75	442	1.71	330	0.95	582	1.66	163	0.72	375	1.9
29	mouth	1	3	fremito	0	1424	11	7	335	1.79	312	1.84	273	1.33	516	1.26	304	2.03	390	1.95	600	1.44
29	mouth	1	1	funzione	0	587	185	8	273	1.33	274	1.97	414	1.34	420	1.64	341	1.89	465	1.86	592	1.5
29	hand	1	2	gallo	0	655	12	5	700	0	695	0.23	486	1.74	215	0.75	600	1.39	112	0.54	212	1.48
29	mouth	1	2	giraffa	0	843	1	7	681	0.49	674	0.69	463	2.39	181	0.54	644	1.42	106	0.24	306	1.78
29	mouth	1	3	giuramento	0	532	13	10	309	1.5	344	1.91	393	1.44	400	1.12	417	1.76	400	1.9	553	1.21
29	hand	1	3	impulso	0	695	50	7	300	1.63	300	1.89	437	1.92	452	1.28	338	1.84	506	1	463	1.56
29	mouth	1	1	indiscrezione	0	559	16	13	188	0.99	191	1.16	395	1.9	556	1.15	303	1.71	562	1.26	616	1.49
29	mouth	1	1	inefficienza	0	629	17	12	245	1.3	274	1.56	418	1.87	521	1.14	345	1.88	515	1.69	563	1.71
29	mouth	1	1	inesperienza	0	699	5	12	232	1.19	220	1.42	427	1.83	458	1.32	355	1.77	550	1.48	556	1.54
29	hand	1	1	insufficienza	0	620	15	13	265	1.67	230	1.55	416	2.03	363	1.2	388	2.09	526	1.42	503	1.49
29	hand	1	3	ira	0	475	45	3	296	1.43	391	1.98	395	2.07	400	1.21	382	1.71	474	1.42	491	1.55
29	hand	1	1	logica	0	433	107	6	220	1.42	195	1.43	536	1.38	435	1.42	362	1.92	559	1.33	580	1.76
29	hand	1	1	merito	0	487	141	6	232	1.38	235	1.67	489	1.41	352	1.23	382	1.82	556	1.5	450	1.81
29	hand	1	2	minerale	0	548	9	8	627	0.88	538	1.46	447	1.71	396	1	505	2.09	174	1.08	388	1.26
29	hand	1	2	oca	0	624	29	3	685	0.54	700	0	468	2.21	150	0.52	659	1.08	106	0.24	197	1.33
29	hand	1	3	orrore	0	557	77	6	305	1.29	356	1.74	491	1.78	400	1.38	475	1.8	450	1.71	363	1.71
29	mouth	1	1	ozio	0	467	9	4	268	1.43	384	1.91	445	1.99	450	1.33	494	1.69	480	1.79	568	0.95
29	mouth	1	2	palude	0	647	12	6	645	0.77	613	1.13	332	1.93	341	0.95	578	1.65	175	0.9	310	2.05
29	mouth	1	3	pericolo	0	540	250	8	323	1.5	361	1.85	511	1.85	231	0.7	506	1.77	394	1.37	397	1.51
29	hand	1	1	reputazione	0	601	27	11	215	1.01	213	1.39	411	1.76	569	0.95	282	1.85	594	1.2	619	1
29	hand	1	3	stupore	0	525	62	7	339	1.61	440	1.68	515	1.37	366	1.18	422	1.83	496	1.55	500	1.69
29	mouth	1	2	telegrafo	0	586	3	9	614	1.46	556	1.44	321	1.75	438	1.28	455	2.35	153	1.24	531	1.25
29	mouth	1	1	tendenza	0	824	161	8	169	0.87	184	1.12	455	1.9	530	1.69	294	1.76	591	1.4	604	1.06
29	mouth	1	3	terrore	0	628	96	7	297	1.38	408	1.87	421	1.93	326	1.08	488	1.71	455	1.7	463	2.11
29	mouth	1	2	torre	0	614	44	5	656	0.63	674	0.45	423	2.02	245	0.89	579	1.63	129	0.76	228	1.59
29	mouth	1	3	tradimento	0	626	73	10	363	1.2	300	1.83	464	2.05	415	1.18	485	1.88	418	1.49	432	2.04
29	mouth	1	2	trattore	0	576	2	8	685	0.44	672	0.74	482	2.11	209	0.75	669	0.6	105	0.22	216	1.68
29	hand	1	1	unanimità	0	857	37	8	241	1.46	308	2.1	306	1.6	512	1.25	369	1.62	545	1.73	632	1.11
30	hand	1	3	abbandono	0	661	91	9	297	1.55	300	1.73	397	1.79	374	1.52	413	1.71	455	1.93	505	1.65
30	hand	1	1	affermazione	0	606	59	12	274	1.85	265	1.76	516	1.38	424	1.09	376	1.86	375	1.61	425	1.56
30	mouth	1	3	agitazione	0	593	25	10	413	1.5	311	1.56	541	1.75	320	1.44	497	1.82	441	1.54	364	2.04
30	mouth	1	3	agonia	0	681	29	6	294	1.39	332	1.6	305	1.42	480	1.51	444	1.99	476	1.69	600	1.32
30	mouth	1	2	alghe	0	675	24	5	669	0.62	657	0.73	422	1.93	269	0.6	641	1.48	121	0.54	225	1.34
30	hand	1	2	alveare	0	672	11	7	679	0.42	674	0.57	421	2.32	267	1.02	609	1.44	150	0.73	363	1.74
30	mouth	1	1	analogia	0	632	8	8	206	1.34	327	1.79	418	1.55	539	0.95	313	2.1	517	1.55	620	1.2
30	hand	1	2	canoa	0	703	25	5	679	0.59	688	0.33	440	2.13	335	1.18	600	1.14	114	0.36	288	1.57
30	mouth	1	2	circo	0	615	43	5	616	1.16	660	0.74	453	1.83	228	0.63	626	0.92	179	0.88	205	1
30	mouth	1	1	circostanza	0	691	70	11	273	1.7	228	1.49	412	1.73	479	1.23	331	2.09	485	1.31	642	0.61
30	hand	1	1	concetto	0	561	118	8	168	0.99	224	1.5	509	1.69	426	0.92	315	2.06	635	1.3	544	1.71
30	hand	1	3	conflitto	0	670	140	9	304	1.25	348	1.81	416	2.19	444	1.15	432	1.87	424	1.1	553	1.39
30	mouth	1	2	cravatta	0	602	38	8	694	0.24	688	0.44	552	1.87	250	0.93	675	0.58	105	0.22	200	1.2
30	hand	1	3	disperazione	0	679	101	12	311	1.55	428	1.74	505	1.61	389	1.35	501	1.86	459	1.43	427	1.96
30	hand	1	2	elefante	0	556	36	8	669	0.6	695	0.23	482	1.77	210	0.79	618	1.45	100	0	296	1.9
30	mouth	1	3	emergenza	0	642	161	9	315	1.64	348	1.9	500	1.6	400	1.21	474	1.88	456	1.37	509	1.42
30	hand	1	2	falce	0	867	5	5	662	0.82	632	1.3	387	1.85	365	1.04	575	1.7	129	0.56	288	1.32
30	hand	1	3	fallimento	0	663	99	10	344	1.59	263	1.74	455	1.8	420	1.28	400	1.94	450	1.69	520	1.85
30	hand	1	1	fascino	0	562	149	7	246	1.56	430	1.33	495	1.75	475	1.18	476	1.83	535	1.28	550	1.44
30	hand	1	2	flotta	0	616	35	6	600	1.2	644	0.75	442	1.71	330	0.95	582	1.66	163	0.72	375	1.9
30	mouth	1	3	fremito	0	723	11	7	335	1.79	312	1.84	273	1.33	516	1.26	304	2.03	390	1.95	600	1.44
30	mouth	1	1	funzione	0	631	185	8	273	1.33	274	1.97	414	1.34	420	1.64	341	1.89	465	1.86	592	1.5
30	hand	1	2	gallo	0	835	12	5	700	0	695	0.23	486	1.74	215	0.75	600	1.39	112	0.54	212	1.48
30	mouth	1	2	giraffa	0	561	1	7	681	0.49	674	0.69	463	2.39	181	0.54	644	1.42	106	0.24	306	1.78
30	mouth	1	3	giuramento	0	1071	13	10	309	1.5	344	1.91	393	1.44	400	1.12	417	1.76	400	1.9	553	1.21
30	hand	1	3	impulso	0	525	50	7	300	1.63	300	1.89	437	1.92	452	1.28	338	1.84	506	1	463	1.56
30	mouth	1	1	indiscrezione	0	921	16	13	188	0.99	191	1.16	395	1.9	556	1.15	303	1.71	562	1.26	616	1.49
30	mouth	1	1	inefficienza	0	812	17	12	245	1.3	274	1.56	418	1.87	521	1.14	345	1.88	515	1.69	563	1.71
30	mouth	1	1	inesperienza	0	747	5	12	232	1.19	220	1.42	427	1.83	458	1.32	355	1.77	550	1.48	556	1.54
30	hand	1	1	insufficienza	0	719	15	13	265	1.67	230	1.55	416	2.03	363	1.2	388	2.09	526	1.42	503	1.49
30	hand	1	3	ira	0	610	45	3	296	1.43	391	1.98	395	2.07	400	1.21	382	1.71	474	1.42	491	1.55
30	hand	1	1	logica	0	559	107	6	220	1.42	195	1.43	536	1.38	435	1.42	362	1.92	559	1.33	580	1.76
30	hand	1	1	merito	0	643	141	6	232	1.38	235	1.67	489	1.41	352	1.23	382	1.82	556	1.5	450	1.81
30	hand	1	2	minerale	0	637	9	8	627	0.88	538	1.46	447	1.71	396	1	505	2.09	174	1.08	388	1.26
30	hand	1	2	oca	0	553	29	3	685	0.54	700	0	468	2.21	150	0.52	659	1.08	106	0.24	197	1.33
30	hand	1	3	orrore	0	551	77	6	305	1.29	356	1.74	491	1.78	400	1.38	475	1.8	450	1.71	363	1.71
30	mouth	1	1	ozio	0	687	9	4	268	1.43	384	1.91	445	1.99	450	1.33	494	1.69	480	1.79	568	0.95
30	mouth	1	2	palude	0	751	12	6	645	0.77	613	1.13	332	1.93	341	0.95	578	1.65	175	0.9	310	2.05
30	mouth	1	3	pericolo	0	579	250	8	323	1.5	361	1.85	511	1.85	231	0.7	506	1.77	394	1.37	397	1.51
30	hand	1	1	reputazione	0	586	27	11	215	1.01	213	1.39	411	1.76	569	0.95	282	1.85	594	1.2	619	1
30	hand	1	3	stupore	0	604	62	7	339	1.61	440	1.68	515	1.37	366	1.18	422	1.83	496	1.55	500	1.69
30	mouth	1	2	telegrafo	0	608	3	9	614	1.46	556	1.44	321	1.75	438	1.28	455	2.35	153	1.24	531	1.25
30	mouth	1	1	tendenza	0	681	161	8	169	0.87	184	1.12	455	1.9	530	1.69	294	1.76	591	1.4	604	1.06
30	mouth	1	3	terrore	0	638	96	7	297	1.38	408	1.87	421	1.93	326	1.08	488	1.71	455	1.7	463	2.11
30	mouth	1	2	torre	0	619	44	5	656	0.63	674	0.45	423	2.02	245	0.89	579	1.63	129	0.76	228	1.59
30	mouth	1	3	tradimento	0	652	73	10	363	1.2	300	1.83	464	2.05	415	1.18	485	1.88	418	1.49	432	2.04
30	mouth	1	2	trattore	0	673	2	8	685	0.44	672	0.74	482	2.11	209	0.75	669	0.6	105	0.22	216	1.68
30	hand	1	1	unanimità	0	528	37	8	241	1.46	308	2.1	306	1.6	512	1.25	369	1.62	545	1.73	632	1.11
31	hand	1	3	abbandono	0	720	91	9	297	1.55	300	1.73	397	1.79	374	1.52	413	1.71	455	1.93	505	1.65
31	hand	1	1	affermazione	0	762	59	12	274	1.85	265	1.76	516	1.38	424	1.09	376	1.86	375	1.61	425	1.56
31	mouth	1	3	agitazione	0	667	25	10	413	1.5	311	1.56	541	1.75	320	1.44	497	1.82	441	1.54	364	2.04
31	mouth	1	3	agonia	0	902	29	6	294	1.39	332	1.6	305	1.42	480	1.51	444	1.99	476	1.69	600	1.32
31	mouth	1	2	alghe	0	616	24	5	669	0.62	657	0.73	422	1.93	269	0.6	641	1.48	121	0.54	225	1.34
31	hand	1	2	alveare	0	747	11	7	679	0.42	674	0.57	421	2.32	267	1.02	609	1.44	150	0.73	363	1.74
31	mouth	1	1	analogia	1		8	8	206	1.34	327	1.79	418	1.55	539	0.95	313	2.1	517	1.55	620	1.2
31	hand	1	2	canoa	0	1029	25	5	679	0.59	688	0.33	440	2.13	335	1.18	600	1.14	114	0.36	288	1.57
31	mouth	1	2	circo	0	712	43	5	616	1.16	660	0.74	453	1.83	228	0.63	626	0.92	179	0.88	205	1
31	mouth	1	1	circostanza	0	595	70	11	273	1.7	228	1.49	412	1.73	479	1.23	331	2.09	485	1.31	642	0.61
31	hand	1	1	concetto	0	587	118	8	168	0.99	224	1.5	509	1.69	426	0.92	315	2.06	635	1.3	544	1.71
31	hand	1	3	conflitto	0	462	140	9	304	1.25	348	1.81	416	2.19	444	1.15	432	1.87	424	1.1	553	1.39
31	mouth	1	2	cravatta	0	603	38	8	694	0.24	688	0.44	552	1.87	250	0.93	675	0.58	105	0.22	200	1.2
31	hand	1	3	disperazione	0	598	101	12	311	1.55	428	1.74	505	1.61	389	1.35	501	1.86	459	1.43	427	1.96
31	hand	1	2	elefante	0	590	36	8	669	0.6	695	0.23	482	1.77	210	0.79	618	1.45	100	0	296	1.9
31	mouth	1	3	emergenza	1		161	9	315	1.64	348	1.9	500	1.6	400	1.21	474	1.88	456	1.37	509	1.42
31	hand	1	2	falce	0	785	5	5	662	0.82	632	1.3	387	1.85	365	1.04	575	1.7	129	0.56	288	1.32
31	hand	1	3	fallimento	0	507	99	10	344	1.59	263	1.74	455	1.8	420	1.28	400	1.94	450	1.69	520	1.85
31	hand	1	1	fascino	0	445	149	7	246	1.56	430	1.33	495	1.75	475	1.18	476	1.83	535	1.28	550	1.44
31	hand	1	2	flotta	0	1126	35	6	600	1.2	644	0.75	442	1.71	330	0.95	582	1.66	163	0.72	375	1.9
31	mouth	1	3	fremito	0	615	11	7	335	1.79	312	1.84	273	1.33	516	1.26	304	2.03	390	1.95	600	1.44
31	mouth	1	1	funzione	0	781	185	8	273	1.33	274	1.97	414	1.34	420	1.64	341	1.89	465	1.86	592	1.5
31	hand	1	2	gallo	0	801	12	5	700	0	695	0.23	486	1.74	215	0.75	600	1.39	112	0.54	212	1.48
31	mouth	1	2	giraffa	0	511	1	7	681	0.49	674	0.69	463	2.39	181	0.54	644	1.42	106	0.24	306	1.78
31	mouth	1	3	giuramento	0	826	13	10	309	1.5	344	1.91	393	1.44	400	1.12	417	1.76	400	1.9	553	1.21
31	hand	1	3	impulso	0	438	50	7	300	1.63	300	1.89	437	1.92	452	1.28	338	1.84	506	1	463	1.56
31	mouth	1	1	indiscrezione	1		16	13	188	0.99	191	1.16	395	1.9	556	1.15	303	1.71	562	1.26	616	1.49
31	mouth	1	1	inefficienza	0	1369	17	12	245	1.3	274	1.56	418	1.87	521	1.14	345	1.88	515	1.69	563	1.71
31	mouth	1	1	inesperienza	0	931	5	12	232	1.19	220	1.42	427	1.83	458	1.32	355	1.77	550	1.48	556	1.54
31	hand	1	1	insufficienza	0	1202	15	13	265	1.67	230	1.55	416	2.03	363	1.2	388	2.09	526	1.42	503	1.49
31	hand	1	3	ira	0	531	45	3	296	1.43	391	1.98	395	2.07	400	1.21	382	1.71	474	1.42	491	1.55
31	hand	1	1	logica	0	528	107	6	220	1.42	195	1.43	536	1.38	435	1.42	362	1.92	559	1.33	580	1.76
31	hand	1	1	merito	0	709	141	6	232	1.38	235	1.67	489	1.41	352	1.23	382	1.82	556	1.5	450	1.81
31	hand	1	2	minerale	0	875	9	8	627	0.88	538	1.46	447	1.71	396	1	505	2.09	174	1.08	388	1.26
31	hand	1	2	oca	0	503	29	3	685	0.54	700	0	468	2.21	150	0.52	659	1.08	106	0.24	197	1.33
31	hand	1	3	orrore	0	877	77	6	305	1.29	356	1.74	491	1.78	400	1.38	475	1.8	450	1.71	363	1.71
31	mouth	1	1	ozio	0	612	9	4	268	1.43	384	1.91	445	1.99	450	1.33	494	1.69	480	1.79	568	0.95
31	mouth	1	2	palude	0	594	12	6	645	0.77	613	1.13	332	1.93	341	0.95	578	1.65	175	0.9	310	2.05
31	mouth	1	3	pericolo	0	602	250	8	323	1.5	361	1.85	511	1.85	231	0.7	506	1.77	394	1.37	397	1.51
31	hand	1	1	reputazione	0	695	27	11	215	1.01	213	1.39	411	1.76	569	0.95	282	1.85	594	1.2	619	1
31	hand	1	3	stupore	0	647	62	7	339	1.61	440	1.68	515	1.37	366	1.18	422	1.83	496	1.55	500	1.69
31	mouth	1	2	telegrafo	0	637	3	9	614	1.46	556	1.44	321	1.75	438	1.28	455	2.35	153	1.24	531	1.25
31	mouth	1	1	tendenza	0	694	161	8	169	0.87	184	1.12	455	1.9	530	1.69	294	1.76	591	1.4	604	1.06
31	mouth	1	3	terrore	0	621	96	7	297	1.38	408	1.87	421	1.93	326	1.08	488	1.71	455	1.7	463	2.11
31	mouth	1	2	torre	0	564	44	5	656	0.63	674	0.45	423	2.02	245	0.89	579	1.63	129	0.76	228	1.59
31	mouth	1	3	tradimento	0	595	73	10	363	1.2	300	1.83	464	2.05	415	1.18	485	1.88	418	1.49	432	2.04
31	mouth	1	2	trattore	0	540	2	8	685	0.44	672	0.74	482	2.11	209	0.75	669	0.6	105	0.22	216	1.68
31	hand	1	1	unanimità	0	1069	37	8	241	1.46	308	2.1	306	1.6	512	1.25	369	1.62	545	1.73	632	1.11
32	hand	1	3	abbandono	0	549	91	9	297	1.55	300	1.73	397	1.79	374	1.52	413	1.71	455	1.93	505	1.65
32	hand	1	1	affermazione	0	637	59	12	274	1.85	265	1.76	516	1.38	424	1.09	376	1.86	375	1.61	425	1.56
32	mouth	1	3	agitazione	0	685	25	10	413	1.5	311	1.56	541	1.75	320	1.44	497	1.82	441	1.54	364	2.04
32	mouth	1	3	agonia	0	671	29	6	294	1.39	332	1.6	305	1.42	480	1.51	444	1.99	476	1.69	600	1.32
32	mouth	1	2	alghe	0	667	24	5	669	0.62	657	0.73	422	1.93	269	0.6	641	1.48	121	0.54	225	1.34
32	hand	1	2	alveare	1		11	7	679	0.42	674	0.57	421	2.32	267	1.02	609	1.44	150	0.73	363	1.74
32	mouth	1	1	analogia	0	655	8	8	206	1.34	327	1.79	418	1.55	539	0.95	313	2.1	517	1.55	620	1.2
32	hand	1	2	canoa	0	653	25	5	679	0.59	688	0.33	440	2.13	335	1.18	600	1.14	114	0.36	288	1.57
32	mouth	1	2	circo	0	828	43	5	616	1.16	660	0.74	453	1.83	228	0.63	626	0.92	179	0.88	205	1
32	mouth	1	1	circostanza	0	949	70	11	273	1.7	228	1.49	412	1.73	479	1.23	331	2.09	485	1.31	642	0.61
32	hand	1	1	concetto	1		118	8	168	0.99	224	1.5	509	1.69	426	0.92	315	2.06	635	1.3	544	1.71
32	hand	1	3	conflitto	0	559	140	9	304	1.25	348	1.81	416	2.19	444	1.15	432	1.87	424	1.1	553	1.39
32	mouth	1	2	cravatta	0	825	38	8	694	0.24	688	0.44	552	1.87	250	0.93	675	0.58	105	0.22	200	1.2
32	hand	1	3	disperazione	0	733	101	12	311	1.55	428	1.74	505	1.61	389	1.35	501	1.86	459	1.43	427	1.96
32	hand	1	2	elefante	0	615	36	8	669	0.6	695	0.23	482	1.77	210	0.79	618	1.45	100	0	296	1.9
32	mouth	1	3	emergenza	0	651	161	9	315	1.64	348	1.9	500	1.6	400	1.21	474	1.88	456	1.37	509	1.42
32	hand	1	2	falce	0	1027	5	5	662	0.82	632	1.3	387	1.85	365	1.04	575	1.7	129	0.56	288	1.32
32	hand	1	3	fallimento	0	626	99	10	344	1.59	263	1.74	455	1.8	420	1.28	400	1.94	450	1.69	520	1.85
32	hand	1	1	fascino	0	608	149	7	246	1.56	430	1.33	495	1.75	475	1.18	476	1.83	535	1.28	550	1.44
32	hand	1	2	flotta	0	777	35	6	600	1.2	644	0.75	442	1.71	330	0.95	582	1.66	163	0.72	375	1.9
32	mouth	1	3	fremito	0	700	11	7	335	1.79	312	1.84	273	1.33	516	1.26	304	2.03	390	1.95	600	1.44
32	mouth	1	1	funzione	0	714	185	8	273	1.33	274	1.97	414	1.34	420	1.64	341	1.89	465	1.86	592	1.5
32	hand	1	2	gallo	0	842	12	5	700	0	695	0.23	486	1.74	215	0.75	600	1.39	112	0.54	212	1.48
32	mouth	1	2	giraffa	0	670	1	7	681	0.49	674	0.69	463	2.39	181	0.54	644	1.42	106	0.24	306	1.78
32	mouth	1	3	giuramento	0	1099	13	10	309	1.5	344	1.91	393	1.44	400	1.12	417	1.76	400	1.9	553	1.21
32	hand	1	3	impulso	0	629	50	7	300	1.63	300	1.89	437	1.92	452	1.28	338	1.84	506	1	463	1.56
32	mouth	1	1	indiscrezione	0	953	16	13	188	0.99	191	1.16	395	1.9	556	1.15	303	1.71	562	1.26	616	1.49
32	mouth	1	1	inefficienza	0	1107	17	12	245	1.3	274	1.56	418	1.87	521	1.14	345	1.88	515	1.69	563	1.71
32	mouth	1	1	inesperienza	0	853	5	12	232	1.19	220	1.42	427	1.83	458	1.32	355	1.77	550	1.48	556	1.54
32	hand	1	1	insufficienza	0	636	15	13	265	1.67	230	1.55	416	2.03	363	1.2	388	2.09	526	1.42	503	1.49
32	hand	1	3	ira	0	861	45	3	296	1.43	391	1.98	395	2.07	400	1.21	382	1.71	474	1.42	491	1.55
32	hand	1	1	logica	0	759	107	6	220	1.42	195	1.43	536	1.38	435	1.42	362	1.92	559	1.33	580	1.76
32	hand	1	1	merito	0	801	141	6	232	1.38	235	1.67	489	1.41	352	1.23	382	1.82	556	1.5	450	1.81
32	hand	1	2	minerale	0	758	9	8	627	0.88	538	1.46	447	1.71	396	1	505	2.09	174	1.08	388	1.26
32	hand	1	2	oca	0	535	29	3	685	0.54	700	0	468	2.21	150	0.52	659	1.08	106	0.24	197	1.33
32	hand	1	3	orrore	0	570	77	6	305	1.29	356	1.74	491	1.78	400	1.38	475	1.8	450	1.71	363	1.71
32	mouth	1	1	ozio	0	669	9	4	268	1.43	384	1.91	445	1.99	450	1.33	494	1.69	480	1.79	568	0.95
32	mouth	1	2	palude	0	620	12	6	645	0.77	613	1.13	332	1.93	341	0.95	578	1.65	175	0.9	310	2.05
32	mouth	1	3	pericolo	0	697	250	8	323	1.5	361	1.85	511	1.85	231	0.7	506	1.77	394	1.37	397	1.51
32	hand	1	1	reputazione	0	822	27	11	215	1.01	213	1.39	411	1.76	569	0.95	282	1.85	594	1.2	619	1
32	hand	1	3	stupore	0	667	62	7	339	1.61	440	1.68	515	1.37	366	1.18	422	1.83	496	1.55	500	1.69
32	mouth	1	2	telegrafo	0	684	3	9	614	1.46	556	1.44	321	1.75	438	1.28	455	2.35	153	1.24	531	1.25
32	mouth	1	1	tendenza	0	647	161	8	169	0.87	184	1.12	455	1.9	530	1.69	294	1.76	591	1.4	604	1.06
32	mouth	1	3	terrore	0	639	96	7	297	1.38	408	1.87	421	1.93	326	1.08	488	1.71	455	1.7	463	2.11
32	mouth	1	2	torre	0	590	44	5	656	0.63	674	0.45	423	2.02	245	0.89	579	1.63	129	0.76	228	1.59
32	mouth	1	3	tradimento	0	771	73	10	363	1.2	300	1.83	464	2.05	415	1.18	485	1.88	418	1.49	432	2.04
32	mouth	1	2	trattore	0	743	2	8	685	0.44	672	0.74	482	2.11	209	0.75	669	0.6	105	0.22	216	1.68
32	hand	1	1	unanimità	1		37	8	241	1.46	308	2.1	306	1.6	512	1.25	369	1.62	545	1.73	632	1.11
33	hand	1	3	abbandono	0	610	91	9	297	1.55	300	1.73	397	1.79	374	1.52	413	1.71	455	1.93	505	1.65
33	hand	1	1	affermazione	0	735	59	12	274	1.85	265	1.76	516	1.38	424	1.09	376	1.86	375	1.61	425	1.56
33	mouth	1	3	agitazione	0	740	25	10	413	1.5	311	1.56	541	1.75	320	1.44	497	1.82	441	1.54	364	2.04
33	mouth	1	3	agonia	0	1025	29	6	294	1.39	332	1.6	305	1.42	480	1.51	444	1.99	476	1.69	600	1.32
33	mouth	1	2	alghe	0	932	24	5	669	0.62	657	0.73	422	1.93	269	0.6	641	1.48	121	0.54	225	1.34
33	hand	1	2	alveare	0	645	11	7	679	0.42	674	0.57	421	2.32	267	1.02	609	1.44	150	0.73	363	1.74
33	mouth	1	1	analogia	0	676	8	8	206	1.34	327	1.79	418	1.55	539	0.95	313	2.1	517	1.55	620	1.2
33	hand	1	2	canoa	0	705	25	5	679	0.59	688	0.33	440	2.13	335	1.18	600	1.14	114	0.36	288	1.57
33	mouth	1	2	circo	0	645	43	5	616	1.16	660	0.74	453	1.83	228	0.63	626	0.92	179	0.88	205	1
33	mouth	1	1	circostanza	0	753	70	11	273	1.7	228	1.49	412	1.73	479	1.23	331	2.09	485	1.31	642	0.61
33	hand	1	1	concetto	0	636	118	8	168	0.99	224	1.5	509	1.69	426	0.92	315	2.06	635	1.3	544	1.71
33	hand	1	3	conflitto	0	769	140	9	304	1.25	348	1.81	416	2.19	444	1.15	432	1.87	424	1.1	553	1.39
33	mouth	1	2	cravatta	0	977	38	8	694	0.24	688	0.44	552	1.87	250	0.93	675	0.58	105	0.22	200	1.2
33	hand	1	3	disperazione	0	710	101	12	311	1.55	428	1.74	505	1.61	389	1.35	501	1.86	459	1.43	427	1.96
33	hand	1	2	elefante	0	749	36	8	669	0.6	695	0.23	482	1.77	210	0.79	618	1.45	100	0	296	1.9
33	mouth	1	3	emergenza	0	933	161	9	315	1.64	348	1.9	500	1.6	400	1.21	474	1.88	456	1.37	509	1.42
33	hand	1	2	falce	0	569	5	5	662	0.82	632	1.3	387	1.85	365	1.04	575	1.7	129	0.56	288	1.32
33	hand	1	3	fallimento	0	618	99	10	344	1.59	263	1.74	455	1.8	420	1.28	400	1.94	450	1.69	520	1.85
33	hand	1	1	fascino	0	672	149	7	246	1.56	430	1.33	495	1.75	475	1.18	476	1.83	535	1.28	550	1.44
33	hand	1	2	flotta	0	1070	35	6	600	1.2	644	0.75	442	1.71	330	0.95	582	1.66	163	0.72	375	1.9
33	mouth	1	3	fremito	0	1127	11	7	335	1.79	312	1.84	273	1.33	516	1.26	304	2.03	390	1.95	600	1.44
33	mouth	1	1	funzione	0	512	185	8	273	1.33	274	1.97	414	1.34	420	1.64	341	1.89	465	1.86	592	1.5
33	hand	1	2	gallo	0	870	12	5	700	0	695	0.23	486	1.74	215	0.75	600	1.39	112	0.54	212	1.48
33	mouth	1	2	giraffa	0	713	1	7	681	0.49	674	0.69	463	2.39	181	0.54	644	1.42	106	0.24	306	1.78
33	mouth	1	3	giuramento	0	574	13	10	309	1.5	344	1.91	393	1.44	400	1.12	417	1.76	400	1.9	553	1.21
33	hand	1	3	impulso	0	783	50	7	300	1.63	300	1.89	437	1.92	452	1.28	338	1.84	506	1	463	1.56
33	mouth	1	1	indiscrezione	0	828	16	13	188	0.99	191	1.16	395	1.9	556	1.15	303	1.71	562	1.26	616	1.49
33	mouth	1	1	inefficienza	0	1077	17	12	245	1.3	274	1.56	418	1.87	521	1.14	345	1.88	515	1.69	563	1.71
33	mouth	1	1	inesperienza	0	668	5	12	232	1.19	220	1.42	427	1.83	458	1.32	355	1.77	550	1.48	556	1.54
33	hand	1	1	insufficienza	0	777	15	13	265	1.67	230	1.55	416	2.03	363	1.2	388	2.09	526	1.42	503	1.49
33	hand	1	3	ira	0	934	45	3	296	1.43	391	1.98	395	2.07	400	1.21	382	1.71	474	1.42	491	1.55
33	hand	1	1	logica	0	536	107	6	220	1.42	195	1.43	536	1.38	435	1.42	362	1.92	559	1.33	580	1.76
33	hand	1	1	merito	0	931	141	6	232	1.38	235	1.67	489	1.41	352	1.23	382	1.82	556	1.5	450	1.81
33	hand	1	2	minerale	0	878	9	8	627	0.88	538	1.46	447	1.71	396	1	505	2.09	174	1.08	388	1.26
33	hand	1	2	oca	0	594	29	3	685	0.54	700	0	468	2.21	150	0.52	659	1.08	106	0.24	197	1.33
33	hand	1	3	orrore	0	566	77	6	305	1.29	356	1.74	491	1.78	400	1.38	475	1.8	450	1.71	363	1.71
33	mouth	1	1	ozio	0	959	9	4	268	1.43	384	1.91	445	1.99	450	1.33	494	1.69	480	1.79	568	0.95
33	mouth	1	2	palude	0	829	12	6	645	0.77	613	1.13	332	1.93	341	0.95	578	1.65	175	0.9	310	2.05
33	mouth	1	3	pericolo	0	1023	250	8	323	1.5	361	1.85	511	1.85	231	0.7	506	1.77	394	1.37	397	1.51
33	hand	1	1	reputazione	0	591	27	11	215	1.01	213	1.39	411	1.76	569	0.95	282	1.85	594	1.2	619	1
33	hand	1	3	stupore	0	769	62	7	339	1.61	440	1.68	515	1.37	366	1.18	422	1.83	496	1.55	500	1.69
33	mouth	1	2	telegrafo	0	609	3	9	614	1.46	556	1.44	321	1.75	438	1.28	455	2.35	153	1.24	531	1.25
33	mouth	1	1	tendenza	0	699	161	8	169	0.87	184	1.12	455	1.9	530	1.69	294	1.76	591	1.4	604	1.06
33	mouth	1	3	terrore	0	624	96	7	297	1.38	408	1.87	421	1.93	326	1.08	488	1.71	455	1.7	463	2.11
33	mouth	1	2	torre	0	805	44	5	656	0.63	674	0.45	423	2.02	245	0.89	579	1.63	129	0.76	228	1.59
33	mouth	1	3	tradimento	0	681	73	10	363	1.2	300	1.83	464	2.05	415	1.18	485	1.88	418	1.49	432	2.04
33	mouth	1	2	trattore	0	626	2	8	685	0.44	672	0.74	482	2.11	209	0.75	669	0.6	105	0.22	216	1.68
33	hand	1	1	unanimità	1		37	8	241	1.46	308	2.1	306	1.6	512	1.25	369	1.62	545	1.73	632	1.11
34	hand	1	3	abbandono	0	609	91	9	297	1.55	300	1.73	397	1.79	374	1.52	413	1.71	455	1.93	505	1.65
34	hand	1	1	affermazione	0	636	59	12	274	1.85	265	1.76	516	1.38	424	1.09	376	1.86	375	1.61	425	1.56
34	mouth	1	3	agitazione	0	776	25	10	413	1.5	311	1.56	541	1.75	320	1.44	497	1.82	441	1.54	364	2.04
34	mouth	1	3	agonia	0	588	29	6	294	1.39	332	1.6	305	1.42	480	1.51	444	1.99	476	1.69	600	1.32
34	mouth	1	2	alghe	1		24	5	669	0.62	657	0.73	422	1.93	269	0.6	641	1.48	121	0.54	225	1.34
34	hand	1	2	alveare	0	892	11	7	679	0.42	674	0.57	421	2.32	267	1.02	609	1.44	150	0.73	363	1.74
34	mouth	1	1	analogia	0	1194	8	8	206	1.34	327	1.79	418	1.55	539	0.95	313	2.1	517	1.55	620	1.2
34	hand	1	2	canoa	0	731	25	5	679	0.59	688	0.33	440	2.13	335	1.18	600	1.14	114	0.36	288	1.57
34	mouth	1	2	circo	0	589	43	5	616	1.16	660	0.74	453	1.83	228	0.63	626	0.92	179	0.88	205	1
34	mouth	1	1	circostanza	0	787	70	11	273	1.7	228	1.49	412	1.73	479	1.23	331	2.09	485	1.31	642	0.61
34	hand	1	1	concetto	0	860	118	8	168	0.99	224	1.5	509	1.69	426	0.92	315	2.06	635	1.3	544	1.71
34	hand	1	3	conflitto	0	768	140	9	304	1.25	348	1.81	416	2.19	444	1.15	432	1.87	424	1.1	553	1.39
34	mouth	1	2	cravatta	0	440	38	8	694	0.24	688	0.44	552	1.87	250	0.93	675	0.58	105	0.22	200	1.2
34	hand	1	3	disperazione	0	583	101	12	311	1.55	428	1.74	505	1.61	389	1.35	501	1.86	459	1.43	427	1.96
34	hand	1	2	elefante	0	856	36	8	669	0.6	695	0.23	482	1.77	210	0.79	618	1.45	100	0	296	1.9
34	mouth	1	3	emergenza	0	396	161	9	315	1.64	348	1.9	500	1.6	400	1.21	474	1.88	456	1.37	509	1.42
34	hand	1	2	falce	0	651	5	5	662	0.82	632	1.3	387	1.85	365	1.04	575	1.7	129	0.56	288	1.32
34	hand	1	3	fallimento	0	961	99	10	344	1.59	263	1.74	455	1.8	420	1.28	400	1.94	450	1.69	520	1.85
34	hand	1	1	fascino	0	664	149	7	246	1.56	430	1.33	495	1.75	475	1.18	476	1.83	535	1.28	550	1.44
34	hand	1	2	flotta	0	823	35	6	600	1.2	644	0.75	442	1.71	330	0.95	582	1.66	163	0.72	375	1.9
34	mouth	1	3	fremito	0	628	11	7	335	1.79	312	1.84	273	1.33	516	1.26	304	2.03	390	1.95	600	1.44
34	mouth	1	1	funzione	0	415	185	8	273	1.33	274	1.97	414	1.34	420	1.64	341	1.89	465	1.86	592	1.5
34	hand	1	2	gallo	0	916	12	5	700	0	695	0.23	486	1.74	215	0.75	600	1.39	112	0.54	212	1.48
34	mouth	1	2	giraffa	0	416	1	7	681	0.49	674	0.69	463	2.39	181	0.54	644	1.42	106	0.24	306	1.78
34	mouth	1	3	giuramento	0	657	13	10	309	1.5	344	1.91	393	1.44	400	1.12	417	1.76	400	1.9	553	1.21
34	hand	1	3	impulso	0	795	50	7	300	1.63	300	1.89	437	1.92	452	1.28	338	1.84	506	1	463	1.56
34	mouth	1	1	indiscrezione	0	500	16	13	188	0.99	191	1.16	395	1.9	556	1.15	303	1.71	562	1.26	616	1.49
34	mouth	1	1	inefficienza	0	339	17	12	245	1.3	274	1.56	418	1.87	521	1.14	345	1.88	515	1.69	563	1.71
34	mouth	1	1	inesperienza	0	692	5	12	232	1.19	220	1.42	427	1.83	458	1.32	355	1.77	550	1.48	556	1.54
34	hand	1	1	insufficienza	0	746	15	13	265	1.67	230	1.55	416	2.03	363	1.2	388	2.09	526	1.42	503	1.49
34	hand	1	3	ira	0	659	45	3	296	1.43	391	1.98	395	2.07	400	1.21	382	1.71	474	1.42	491	1.55
34	hand	1	1	logica	0	593	107	6	220	1.42	195	1.43	536	1.38	435	1.42	362	1.92	559	1.33	580	1.76
34	hand	1	1	merito	0	706	141	6	232	1.38	235	1.67	489	1.41	352	1.23	382	1.82	556	1.5	450	1.81
34	hand	1	2	minerale	0	827	9	8	627	0.88	538	1.46	447	1.71	396	1	505	2.09	174	1.08	388	1.26
34	hand	1	2	oca	0	530	29	3	685	0.54	700	0	468	2.21	150	0.52	659	1.08	106	0.24	197	1.33
34	hand	1	3	orrore	0	851	77	6	305	1.29	356	1.74	491	1.78	400	1.38	475	1.8	450	1.71	363	1.71
34	mouth	1	1	ozio	0	687	9	4	268	1.43	384	1.91	445	1.99	450	1.33	494	1.69	480	1.79	568	0.95
34	mouth	1	2	palude	0	947	12	6	645	0.77	613	1.13	332	1.93	341	0.95	578	1.65	175	0.9	310	2.05
34	mouth	1	3	pericolo	0	497	250	8	323	1.5	361	1.85	511	1.85	231	0.7	506	1.77	394	1.37	397	1.51
34	hand	1	1	reputazione	0	1105	27	11	215	1.01	213	1.39	411	1.76	569	0.95	282	1.85	594	1.2	619	1
34	hand	1	3	stupore	0	808	62	7	339	1.61	440	1.68	515	1.37	366	1.18	422	1.83	496	1.55	500	1.69
34	mouth	1	2	telegrafo	0	682	3	9	614	1.46	556	1.44	321	1.75	438	1.28	455	2.35	153	1.24	531	1.25
34	mouth	1	1	tendenza	0	620	161	8	169	0.87	184	1.12	455	1.9	530	1.69	294	1.76	591	1.4	604	1.06
34	mouth	1	3	terrore	0	344	96	7	297	1.38	408	1.87	421	1.93	326	1.08	488	1.71	455	1.7	463	2.11
34	mouth	1	2	torre	0	744	44	5	656	0.63	674	0.45	423	2.02	245	0.89	579	1.63	129	0.76	228	1.59
34	mouth	1	3	tradimento	0	1028	73	10	363	1.2	300	1.83	464	2.05	415	1.18	485	1.88	418	1.49	432	2.04
34	mouth	1	2	trattore	0	717	2	8	685	0.44	672	0.74	482	2.11	209	0.75	669	0.6	105	0.22	216	1.68
34	hand	1	1	unanimità	0	709	37	8	241	1.46	308	2.1	306	1.6	512	1.25	369	1.62	545	1.73	632	1.11
35	mouth	1	3	abbandono	0	1022	91	9	297	1.55	300	1.73	397	1.79	374	1.52	413	1.71	455	1.93	505	1.65
35	mouth	1	1	affermazione	0	783	59	12	274	1.85	265	1.76	516	1.38	424	1.09	376	1.86	375	1.61	425	1.56
35	hand	1	3	agitazione	0	772	25	10	413	1.5	311	1.56	541	1.75	320	1.44	497	1.82	441	1.54	364	2.04
35	hand	1	3	agonia	0	717	29	6	294	1.39	332	1.6	305	1.42	480	1.51	444	1.99	476	1.69	600	1.32
35	hand	1	2	alghe	0	735	24	5	669	0.62	657	0.73	422	1.93	269	0.6	641	1.48	121	0.54	225	1.34
35	mouth	1	2	alveare	1		11	7	679	0.42	674	0.57	421	2.32	267	1.02	609	1.44	150	0.73	363	1.74
35	hand	1	1	analogia	0	775	8	8	206	1.34	327	1.79	418	1.55	539	0.95	313	2.1	517	1.55	620	1.2
35	mouth	1	2	canoa	1		25	5	679	0.59	688	0.33	440	2.13	335	1.18	600	1.14	114	0.36	288	1.57
35	hand	1	2	circo	0	1040	43	5	616	1.16	660	0.74	453	1.83	228	0.63	626	0.92	179	0.88	205	1
35	hand	1	1	circostanza	0	633	70	11	273	1.7	228	1.49	412	1.73	479	1.23	331	2.09	485	1.31	642	0.61
35	mouth	1	1	concetto	0	735	118	8	168	0.99	224	1.5	509	1.69	426	0.92	315	2.06	635	1.3	544	1.71
35	mouth	1	3	conflitto	0	756	140	9	304	1.25	348	1.81	416	2.19	444	1.15	432	1.87	424	1.1	553	1.39
35	hand	1	2	cravatta	0	777	38	8	694	0.24	688	0.44	552	1.87	250	0.93	675	0.58	105	0.22	200	1.2
35	mouth	1	3	disperazione	0	789	101	12	311	1.55	428	1.74	505	1.61	389	1.35	501	1.86	459	1.43	427	1.96
35	mouth	1	2	elefante	0	867	36	8	669	0.6	695	0.23	482	1.77	210	0.79	618	1.45	100	0	296	1.9
35	hand	1	3	emergenza	0	932	161	9	315	1.64	348	1.9	500	1.6	400	1.21	474	1.88	456	1.37	509	1.42
35	mouth	1	2	falce	0	991	5	5	662	0.82	632	1.3	387	1.85	365	1.04	575	1.7	129	0.56	288	1.32
35	mouth	1	3	fallimento	0	756	99	10	344	1.59	263	1.74	455	1.8	420	1.28	400	1.94	450	1.69	520	1.85
35	mouth	1	1	fascino	0	971	149	7	246	1.56	430	1.33	495	1.75	475	1.18	476	1.83	535	1.28	550	1.44
35	mouth	1	2	flotta	0	737	35	6	600	1.2	644	0.75	442	1.71	330	0.95	582	1.66	163	0.72	375	1.9
35	hand	1	3	fremito	0	1008	11	7	335	1.79	312	1.84	273	1.33	516	1.26	304	2.03	390	1.95	600	1.44
35	hand	1	1	funzione	0	619	185	8	273	1.33	274	1.97	414	1.34	420	1.64	341	1.89	465	1.86	592	1.5
35	mouth	1	2	gallo	0	832	12	5	700	0	695	0.23	486	1.74	215	0.75	600	1.39	112	0.54	212	1.48
35	hand	1	2	giraffa	0	565	1	7	681	0.49	674	0.69	463	2.39	181	0.54	644	1.42	106	0.24	306	1.78
35	hand	1	3	giuramento	0	943	13	10	309	1.5	344	1.91	393	1.44	400	1.12	417	1.76	400	1.9	553	1.21
35	mouth	1	3	impulso	0	838	50	7	300	1.63	300	1.89	437	1.92	452	1.28	338	1.84	506	1	463	1.56
35	hand	1	1	indiscrezione	0	769	16	13	188	0.99	191	1.16	395	1.9	556	1.15	303	1.71	562	1.26	616	1.49
35	hand	1	1	inefficienza	0	1041	17	12	245	1.3	274	1.56	418	1.87	521	1.14	345	1.88	515	1.69	563	1.71
35	hand	1	1	inesperienza	0	1249	5	12	232	1.19	220	1.42	427	1.83	458	1.32	355	1.77	550	1.48	556	1.54
35	mouth	1	1	insufficienza	0	698	15	13	265	1.67	230	1.55	416	2.03	363	1.2	388	2.09	526	1.42	503	1.49
35	mouth	1	3	ira	0	657	45	3	296	1.43	391	1.98	395	2.07	400	1.21	382	1.71	474	1.42	491	1.55
35	mouth	1	1	logica	0	687	107	6	220	1.42	195	1.43	536	1.38	435	1.42	362	1.92	559	1.33	580	1.76
35	mouth	1	1	merito	0	721	141	6	232	1.38	235	1.67	489	1.41	352	1.23	382	1.82	556	1.5	450	1.81
35	mouth	1	2	minerale	0	758	9	8	627	0.88	538	1.46	447	1.71	396	1	505	2.09	174	1.08	388	1.26
35	mouth	1	2	oca	0	666	29	3	685	0.54	700	0	468	2.21	150	0.52	659	1.08	106	0.24	197	1.33
35	mouth	1	3	orrore	0	964	77	6	305	1.29	356	1.74	491	1.78	400	1.38	475	1.8	450	1.71	363	1.71
35	hand	1	1	ozio	0	718	9	4	268	1.43	384	1.91	445	1.99	450	1.33	494	1.69	480	1.79	568	0.95
35	hand	1	2	palude	0	734	12	6	645	0.77	613	1.13	332	1.93	341	0.95	578	1.65	175	0.9	310	2.05
35	hand	1	3	pericolo	0	695	250	8	323	1.5	361	1.85	511	1.85	231	0.7	506	1.77	394	1.37	397	1.51
35	mouth	1	1	reputazione	0	1181	27	11	215	1.01	213	1.39	411	1.76	569	0.95	282	1.85	594	1.2	619	1
35	mouth	1	3	stupore	0	697	62	7	339	1.61	440	1.68	515	1.37	366	1.18	422	1.83	496	1.55	500	1.69
35	hand	1	2	telegrafo	0	813	3	9	614	1.46	556	1.44	321	1.75	438	1.28	455	2.35	153	1.24	531	1.25
35	hand	1	1	tendenza	0	750	161	8	169	0.87	184	1.12	455	1.9	530	1.69	294	1.76	591	1.4	604	1.06
35	hand	1	3	terrore	0	923	96	7	297	1.38	408	1.87	421	1.93	326	1.08	488	1.71	455	1.7	463	2.11
35	hand	1	2	torre	0	624	44	5	656	0.63	674	0.45	423	2.02	245	0.89	579	1.63	129	0.76	228	1.59
35	hand	1	3	tradimento	0	698	73	10	363	1.2	300	1.83	464	2.05	415	1.18	485	1.88	418	1.49	432	2.04
35	hand	1	2	trattore	0	825	2	8	685	0.44	672	0.74	482	2.11	209	0.75	669	0.6	105	0.22	216	1.68
35	mouth	1	1	unanimità	1		37	8	241	1.46	308	2.1	306	1.6	512	1.25	369	1.62	545	1.73	632	1.11
36	mouth	1	3	abbandono	0	895	91	9	297	1.55	300	1.73	397	1.79	374	1.52	413	1.71	455	1.93	505	1.65
36	mouth	1	1	affermazione	0	904	59	12	274	1.85	265	1.76	516	1.38	424	1.09	376	1.86	375	1.61	425	1.56
36	hand	1	3	agitazione	0	854	25	10	413	1.5	311	1.56	541	1.75	320	1.44	497	1.82	441	1.54	364	2.04
36	hand	1	3	agonia	0	789	29	6	294	1.39	332	1.6	305	1.42	480	1.51	444	1.99	476	1.69	600	1.32
36	hand	1	2	alghe	0	800	24	5	669	0.62	657	0.73	422	1.93	269	0.6	641	1.48	121	0.54	225	1.34
36	mouth	1	2	alveare	0	874	11	7	679	0.42	674	0.57	421	2.32	267	1.02	609	1.44	150	0.73	363	1.74
36	hand	1	1	analogia	0	927	8	8	206	1.34	327	1.79	418	1.55	539	0.95	313	2.1	517	1.55	620	1.2
36	mouth	1	2	canoa	0	755	25	5	679	0.59	688	0.33	440	2.13	335	1.18	600	1.14	114	0.36	288	1.57
36	hand	1	2	circo	0	675	43	5	616	1.16	660	0.74	453	1.83	228	0.63	626	0.92	179	0.88	205	1
36	hand	1	1	circostanza	0	740	70	11	273	1.7	228	1.49	412	1.73	479	1.23	331	2.09	485	1.31	642	0.61
36	mouth	1	1	concetto	0	1161	118	8	168	0.99	224	1.5	509	1.69	426	0.92	315	2.06	635	1.3	544	1.71
36	mouth	1	3	conflitto	0	676	140	9	304	1.25	348	1.81	416	2.19	444	1.15	432	1.87	424	1.1	553	1.39
36	hand	1	2	cravatta	0	886	38	8	694	0.24	688	0.44	552	1.87	250	0.93	675	0.58	105	0.22	200	1.2
36	mouth	1	3	disperazione	0	938	101	12	311	1.55	428	1.74	505	1.61	389	1.35	501	1.86	459	1.43	427	1.96
36	mouth	1	2	elefante	0	713	36	8	669	0.6	695	0.23	482	1.77	210	0.79	618	1.45	100	0	296	1.9
36	hand	1	3	emergenza	0	911	161	9	315	1.64	348	1.9	500	1.6	400	1.21	474	1.88	456	1.37	509	1.42
36	mouth	1	2	falce	0	751	5	5	662	0.82	632	1.3	387	1.85	365	1.04	575	1.7	129	0.56	288	1.32
36	mouth	1	3	fallimento	0	778	99	10	344	1.59	263	1.74	455	1.8	420	1.28	400	1.94	450	1.69	520	1.85
36	mouth	1	1	fascino	0	1281	149	7	246	1.56	430	1.33	495	1.75	475	1.18	476	1.83	535	1.28	550	1.44
36	mouth	1	2	flotta	0	721	35	6	600	1.2	644	0.75	442	1.71	330	0.95	582	1.66	163	0.72	375	1.9
36	hand	1	3	fremito	0	1015	11	7	335	1.79	312	1.84	273	1.33	516	1.26	304	2.03	390	1.95	600	1.44
36	hand	1	1	funzione	0	774	185	8	273	1.33	274	1.97	414	1.34	420	1.64	341	1.89	465	1.86	592	1.5
36	mouth	1	2	gallo	0	806	12	5	700	0	695	0.23	486	1.74	215	0.75	600	1.39	112	0.54	212	1.48
36	hand	1	2	giraffa	0	790	1	7	681	0.49	674	0.69	463	2.39	181	0.54	644	1.42	106	0.24	306	1.78
36	hand	1	3	giuramento	0	1166	13	10	309	1.5	344	1.91	393	1.44	400	1.12	417	1.76	400	1.9	553	1.21
36	mouth	1	3	impulso	0	631	50	7	300	1.63	300	1.89	437	1.92	452	1.28	338	1.84	506	1	463	1.56
36	hand	1	1	indiscrezione	0	1088	16	13	188	0.99	191	1.16	395	1.9	556	1.15	303	1.71	562	1.26	616	1.49
36	hand	1	1	inefficienza	0	878	17	12	245	1.3	274	1.56	418	1.87	521	1.14	345	1.88	515	1.69	563	1.71
36	hand	1	1	inesperienza	0	1245	5	12	232	1.19	220	1.42	427	1.83	458	1.32	355	1.77	550	1.48	556	1.54
36	mouth	1	1	insufficienza	0	1223	15	13	265	1.67	230	1.55	416	2.03	363	1.2	388	2.09	526	1.42	503	1.49
36	mouth	1	3	ira	0	829	45	3	296	1.43	391	1.98	395	2.07	400	1.21	382	1.71	474	1.42	491	1.55
36	mouth	1	1	logica	0	873	107	6	220	1.42	195	1.43	536	1.38	435	1.42	362	1.92	559	1.33	580	1.76
36	mouth	1	1	merito	0	773	141	6	232	1.38	235	1.67	489	1.41	352	1.23	382	1.82	556	1.5	450	1.81
36	mouth	1	2	minerale	0	741	9	8	627	0.88	538	1.46	447	1.71	396	1	505	2.09	174	1.08	388	1.26
36	mouth	1	2	oca	1		29	3	685	0.54	700	0	468	2.21	150	0.52	659	1.08	106	0.24	197	1.33
36	mouth	1	3	orrore	0	715	77	6	305	1.29	356	1.74	491	1.78	400	1.38	475	1.8	450	1.71	363	1.71
36	hand	1	1	ozio	0	777	9	4	268	1.43	384	1.91	445	1.99	450	1.33	494	1.69	480	1.79	568	0.95
36	hand	1	2	palude	0	1179	12	6	645	0.77	613	1.13	332	1.93	341	0.95	578	1.65	175	0.9	310	2.05
36	hand	1	3	pericolo	0	713	250	8	323	1.5	361	1.85	511	1.85	231	0.7	506	1.77	394	1.37	397	1.51
36	mouth	1	1	reputazione	0	1105	27	11	215	1.01	213	1.39	411	1.76	569	0.95	282	1.85	594	1.2	619	1
36	mouth	1	3	stupore	0	1096	62	7	339	1.61	440	1.68	515	1.37	366	1.18	422	1.83	496	1.55	500	1.69
36	hand	1	2	telegrafo	0	773	3	9	614	1.46	556	1.44	321	1.75	438	1.28	455	2.35	153	1.24	531	1.25
36	hand	1	1	tendenza	0	794	161	8	169	0.87	184	1.12	455	1.9	530	1.69	294	1.76	591	1.4	604	1.06
36	hand	1	3	terrore	0	644	96	7	297	1.38	408	1.87	421	1.93	326	1.08	488	1.71	455	1.7	463	2.11
36	hand	1	2	torre	0	802	44	5	656	0.63	674	0.45	423	2.02	245	0.89	579	1.63	129	0.76	228	1.59
36	hand	1	3	tradimento	0	801	73	10	363	1.2	300	1.83	464	2.05	415	1.18	485	1.88	418	1.49	432	2.04
36	hand	1	2	trattore	0	870	2	8	685	0.44	672	0.74	482	2.11	209	0.75	669	0.6	105	0.22	216	1.68
36	mouth	1	1	unanimità	0	1042	37	8	241	1.46	308	2.1	306	1.6	512	1.25	369	1.62	545	1.73	632	1.11
37	hand	1	3	abbandono	0	677	91	9	297	1.55	300	1.73	397	1.79	374	1.52	413	1.71	455	1.93	505	1.65
37	hand	1	1	affermazione	0	583	59	12	274	1.85	265	1.76	516	1.38	424	1.09	376	1.86	375	1.61	425	1.56
37	mouth	1	3	agitazione	0	636	25	10	413	1.5	311	1.56	541	1.75	320	1.44	497	1.82	441	1.54	364	2.04
37	mouth	1	3	agonia	0	648	29	6	294	1.39	332	1.6	305	1.42	480	1.51	444	1.99	476	1.69	600	1.32
37	mouth	1	2	alghe	0	695	24	5	669	0.62	657	0.73	422	1.93	269	0.6	641	1.48	121	0.54	225	1.34
37	hand	1	2	alveare	0	628	11	7	679	0.42	674	0.57	421	2.32	267	1.02	609	1.44	150	0.73	363	1.74
37	mouth	1	1	analogia	0	646	8	8	206	1.34	327	1.79	418	1.55	539	0.95	313	2.1	517	1.55	620	1.2
37	hand	1	2	canoa	0	746	25	5	679	0.59	688	0.33	440	2.13	335	1.18	600	1.14	114	0.36	288	1.57
37	mouth	1	2	circo	0	591	43	5	616	1.16	660	0.74	453	1.83	228	0.63	626	0.92	179	0.88	205	1
37	mouth	1	1	circostanza	0	840	70	11	273	1.7	228	1.49	412	1.73	479	1.23	331	2.09	485	1.31	642	0.61
37	hand	1	1	concetto	0	898	118	8	168	0.99	224	1.5	509	1.69	426	0.92	315	2.06	635	1.3	544	1.71
37	hand	1	3	conflitto	0	558	140	9	304	1.25	348	1.81	416	2.19	444	1.15	432	1.87	424	1.1	553	1.39
37	mouth	1	2	cravatta	0	745	38	8	694	0.24	688	0.44	552	1.87	250	0.93	675	0.58	105	0.22	200	1.2
37	hand	1	3	disperazione	0	770	101	12	311	1.55	428	1.74	505	1.61	389	1.35	501	1.86	459	1.43	427	1.96
37	hand	1	2	elefante	0	595	36	8	669	0.6	695	0.23	482	1.77	210	0.79	618	1.45	100	0	296	1.9
37	mouth	1	3	emergenza	0	575	161	9	315	1.64	348	1.9	500	1.6	400	1.21	474	1.88	456	1.37	509	1.42
37	hand	1	2	falce	0	623	5	5	662	0.82	632	1.3	387	1.85	365	1.04	575	1.7	129	0.56	288	1.32
37	hand	1	3	fallimento	0	650	99	10	344	1.59	263	1.74	455	1.8	420	1.28	400	1.94	450	1.69	520	1.85
37	hand	1	1	fascino	0	559	149	7	246	1.56	430	1.33	495	1.75	475	1.18	476	1.83	535	1.28	550	1.44
37	hand	1	2	flotta	0	669	35	6	600	1.2	644	0.75	442	1.71	330	0.95	582	1.66	163	0.72	375	1.9
37	mouth	1	3	fremito	0	859	11	7	335	1.79	312	1.84	273	1.33	516	1.26	304	2.03	390	1.95	600	1.44
37	mouth	1	1	funzione	0	627	185	8	273	1.33	274	1.97	414	1.34	420	1.64	341	1.89	465	1.86	592	1.5
37	hand	1	2	gallo	0	780	12	5	700	0	695	0.23	486	1.74	215	0.75	600	1.39	112	0.54	212	1.48
37	mouth	1	2	giraffa	0	782	1	7	681	0.49	674	0.69	463	2.39	181	0.54	644	1.42	106	0.24	306	1.78
37	mouth	1	3	giuramento	0	608	13	10	309	1.5	344	1.91	393	1.44	400	1.12	417	1.76	400	1.9	553	1.21
37	hand	1	3	impulso	0	589	50	7	300	1.63	300	1.89	437	1.92	452	1.28	338	1.84	506	1	463	1.56
37	mouth	1	1	indiscrezione	0	720	16	13	188	0.99	191	1.16	395	1.9	556	1.15	303	1.71	562	1.26	616	1.49
37	mouth	1	1	inefficienza	0	837	17	12	245	1.3	274	1.56	418	1.87	521	1.14	345	1.88	515	1.69	563	1.71
37	mouth	1	1	inesperienza	1		5	12	232	1.19	220	1.42	427	1.83	458	1.32	355	1.77	550	1.48	556	1.54
37	hand	1	1	insufficienza	0	724	15	13	265	1.67	230	1.55	416	2.03	363	1.2	388	2.09	526	1.42	503	1.49
37	hand	1	3	ira	0	532	45	3	296	1.43	391	1.98	395	2.07	400	1.21	382	1.71	474	1.42	491	1.55
37	hand	1	1	logica	0	650	107	6	220	1.42	195	1.43	536	1.38	435	1.42	362	1.92	559	1.33	580	1.76
37	hand	1	1	merito	0	768	141	6	232	1.38	235	1.67	489	1.41	352	1.23	382	1.82	556	1.5	450	1.81
37	hand	1	2	minerale	0	527	9	8	627	0.88	538	1.46	447	1.71	396	1	505	2.09	174	1.08	388	1.26
37	hand	1	2	oca	0	864	29	3	685	0.54	700	0	468	2.21	150	0.52	659	1.08	106	0.24	197	1.33
37	hand	1	3	orrore	0	584	77	6	305	1.29	356	1.74	491	1.78	400	1.38	475	1.8	450	1.71	363	1.71
37	mouth	1	1	ozio	0	638	9	4	268	1.43	384	1.91	445	1.99	450	1.33	494	1.69	480	1.79	568	0.95
37	mouth	1	2	palude	0	560	12	6	645	0.77	613	1.13	332	1.93	341	0.95	578	1.65	175	0.9	310	2.05
37	mouth	1	3	pericolo	0	680	250	8	323	1.5	361	1.85	511	1.85	231	0.7	506	1.77	394	1.37	397	1.51
37	hand	1	1	reputazione	0	614	27	11	215	1.01	213	1.39	411	1.76	569	0.95	282	1.85	594	1.2	619	1
37	hand	1	3	stupore	0	590	62	7	339	1.61	440	1.68	515	1.37	366	1.18	422	1.83	496	1.55	500	1.69
37	mouth	1	2	telegrafo	0	795	3	9	614	1.46	556	1.44	321	1.75	438	1.28	455	2.35	153	1.24	531	1.25
37	mouth	1	1	tendenza	0	980	161	8	169	0.87	184	1.12	455	1.9	530	1.69	294	1.76	591	1.4	604	1.06
37	mouth	1	3	terrore	0	750	96	7	297	1.38	408	1.87	421	1.93	326	1.08	488	1.71	455	1.7	463	2.11
37	mouth	1	2	torre	0	585	44	5	656	0.63	674	0.45	423	2.02	245	0.89	579	1.63	129	0.76	228	1.59
37	mouth	1	3	tradimento	0	649	73	10	363	1.2	300	1.83	464	2.05	415	1.18	485	1.88	418	1.49	432	2.04
37	mouth	1	2	trattore	0	611	2	8	685	0.44	672	0.74	482	2.11	209	0.75	669	0.6	105	0.22	216	1.68
37	hand	1	1	unanimità	1		37	8	241	1.46	308	2.1	306	1.6	512	1.25	369	1.62	545	1.73	632	1.11
38	hand	1	3	abbandono	0	959	91	9	297	1.55	300	1.73	397	1.79	374	1.52	413	1.71	455	1.93	505	1.65
38	hand	1	1	affermazione	0	857	59	12	274	1.85	265	1.76	516	1.38	424	1.09	376	1.86	375	1.61	425	1.56
38	mouth	1	3	agitazione	0	974	25	10	413	1.5	311	1.56	541	1.75	320	1.44	497	1.82	441	1.54	364	2.04
38	mouth	1	3	agonia	0	748	29	6	294	1.39	332	1.6	305	1.42	480	1.51	444	1.99	476	1.69	600	1.32
38	mouth	1	2	alghe	0	675	24	5	669	0.62	657	0.73	422	1.93	269	0.6	641	1.48	121	0.54	225	1.34
38	hand	1	2	alveare	0	902	11	7	679	0.42	674	0.57	421	2.32	267	1.02	609	1.44	150	0.73	363	1.74
38	mouth	1	1	analogia	0	813	8	8	206	1.34	327	1.79	418	1.55	539	0.95	313	2.1	517	1.55	620	1.2
38	hand	1	2	canoa	0	789	25	5	679	0.59	688	0.33	440	2.13	335	1.18	600	1.14	114	0.36	288	1.57
38	mouth	1	2	circo	0	662	43	5	616	1.16	660	0.74	453	1.83	228	0.63	626	0.92	179	0.88	205	1
38	mouth	1	1	circostanza	0	1047	70	11	273	1.7	228	1.49	412	1.73	479	1.23	331	2.09	485	1.31	642	0.61
38	hand	1	1	concetto	0	873	118	8	168	0.99	224	1.5	509	1.69	426	0.92	315	2.06	635	1.3	544	1.71
38	hand	1	3	conflitto	0	880	140	9	304	1.25	348	1.81	416	2.19	444	1.15	432	1.87	424	1.1	553	1.39
38	mouth	1	2	cravatta	0	927	38	8	694	0.24	688	0.44	552	1.87	250	0.93	675	0.58	105	0.22	200	1.2
38	hand	1	3	disperazione	0	860	101	12	311	1.55	428	1.74	505	1.61	389	1.35	501	1.86	459	1.43	427	1.96
38	hand	1	2	elefante	0	759	36	8	669	0.6	695	0.23	482	1.77	210	0.79	618	1.45	100	0	296	1.9
38	mouth	1	3	emergenza	0	824	161	9	315	1.64	348	1.9	500	1.6	400	1.21	474	1.88	456	1.37	509	1.42
38	hand	1	2	falce	0	634	5	5	662	0.82	632	1.3	387	1.85	365	1.04	575	1.7	129	0.56	288	1.32
38	hand	1	3	fallimento	0	875	99	10	344	1.59	263	1.74	455	1.8	420	1.28	400	1.94	450	1.69	520	1.85
38	hand	1	1	fascino	0	757	149	7	246	1.56	430	1.33	495	1.75	475	1.18	476	1.83	535	1.28	550	1.44
38	hand	1	2	flotta	0	814	35	6	600	1.2	644	0.75	442	1.71	330	0.95	582	1.66	163	0.72	375	1.9
38	mouth	1	3	fremito	1		11	7	335	1.79	312	1.84	273	1.33	516	1.26	304	2.03	390	1.95	600	1.44
38	mouth	1	1	funzione	0	793	185	8	273	1.33	274	1.97	414	1.34	420	1.64	341	1.89	465	1.86	592	1.5
38	hand	1	2	gallo	0	647	12	5	700	0	695	0.23	486	1.74	215	0.75	600	1.39	112	0.54	212	1.48
38	mouth	1	2	giraffa	0	988	1	7	681	0.49	674	0.69	463	2.39	181	0.54	644	1.42	106	0.24	306	1.78
38	mouth	1	3	giuramento	0	1005	13	10	309	1.5	344	1.91	393	1.44	400	1.12	417	1.76	400	1.9	553	1.21
38	hand	1	3	impulso	0	770	50	7	300	1.63	300	1.89	437	1.92	452	1.28	338	1.84	506	1	463	1.56
38	mouth	1	1	indiscrezione	0	1234	16	13	188	0.99	191	1.16	395	1.9	556	1.15	303	1.71	562	1.26	616	1.49
38	mouth	1	1	inefficienza	0	1071	17	12	245	1.3	274	1.56	418	1.87	521	1.14	345	1.88	515	1.69	563	1.71
38	mouth	1	1	inesperienza	1		5	12	232	1.19	220	1.42	427	1.83	458	1.32	355	1.77	550	1.48	556	1.54
38	hand	1	1	insufficienza	0	924	15	13	265	1.67	230	1.55	416	2.03	363	1.2	388	2.09	526	1.42	503	1.49
38	hand	1	3	ira	0	628	45	3	296	1.43	391	1.98	395	2.07	400	1.21	382	1.71	474	1.42	491	1.55
38	hand	1	1	logica	0	688	107	6	220	1.42	195	1.43	536	1.38	435	1.42	362	1.92	559	1.33	580	1.76
38	hand	1	1	merito	0	870	141	6	232	1.38	235	1.67	489	1.41	352	1.23	382	1.82	556	1.5	450	1.81
38	hand	1	2	minerale	0	846	9	8	627	0.88	538	1.46	447	1.71	396	1	505	2.09	174	1.08	388	1.26
38	hand	1	2	oca	0	649	29	3	685	0.54	700	0	468	2.21	150	0.52	659	1.08	106	0.24	197	1.33
38	hand	1	3	orrore	0	957	77	6	305	1.29	356	1.74	491	1.78	400	1.38	475	1.8	450	1.71	363	1.71
38	mouth	1	1	ozio	0	975	9	4	268	1.43	384	1.91	445	1.99	450	1.33	494	1.69	480	1.79	568	0.95
38	mouth	1	2	palude	0	1094	12	6	645	0.77	613	1.13	332	1.93	341	0.95	578	1.65	175	0.9	310	2.05
38	mouth	1	3	pericolo	0	783	250	8	323	1.5	361	1.85	511	1.85	231	0.7	506	1.77	394	1.37	397	1.51
38	hand	1	1	reputazione	0	909	27	11	215	1.01	213	1.39	411	1.76	569	0.95	282	1.85	594	1.2	619	1
38	hand	1	3	stupore	0	772	62	7	339	1.61	440	1.68	515	1.37	366	1.18	422	1.83	496	1.55	500	1.69
38	mouth	1	2	telegrafo	0	1042	3	9	614	1.46	556	1.44	321	1.75	438	1.28	455	2.35	153	1.24	531	1.25
38	mouth	1	1	tendenza	0	940	161	8	169	0.87	184	1.12	455	1.9	530	1.69	294	1.76	591	1.4	604	1.06
38	mouth	1	3	terrore	0	1057	96	7	297	1.38	408	1.87	421	1.93	326	1.08	488	1.71	455	1.7	463	2.11
38	mouth	1	2	torre	0	1038	44	5	656	0.63	674	0.45	423	2.02	245	0.89	579	1.63	129	0.76	228	1.59
38	mouth	1	3	tradimento	0	794	73	10	363	1.2	300	1.83	464	2.05	415	1.18	485	1.88	418	1.49	432	2.04
38	mouth	1	2	trattore	0	722	2	8	685	0.44	672	0.74	482	2.11	209	0.75	669	0.6	105	0.22	216	1.68
38	hand	1	1	unanimità	0	1464	37	8	241	1.46	308	2.1	306	1.6	512	1.25	369	1.62	545	1.73	632	1.11
39	mouth	1	3	abbandono	0	765	91	9	297	1.55	300	1.73	397	1.79	374	1.52	413	1.71	455	1.93	505	1.65
39	mouth	1	1	affermazione	0	738	59	12	274	1.85	265	1.76	516	1.38	424	1.09	376	1.86	375	1.61	425	1.56
39	hand	1	3	agitazione	0	861	25	10	413	1.5	311	1.56	541	1.75	320	1.44	497	1.82	441	1.54	364	2.04
39	hand	1	3	agonia	0	671	29	6	294	1.39	332	1.6	305	1.42	480	1.51	444	1.99	476	1.69	600	1.32
39	hand	1	2	alghe	0	761	24	5	669	0.62	657	0.73	422	1.93	269	0.6	641	1.48	121	0.54	225	1.34
39	mouth	1	2	alveare	0	754	11	7	679	0.42	674	0.57	421	2.32	267	1.02	609	1.44	150	0.73	363	1.74
39	hand	1	1	analogia	0	847	8	8	206	1.34	327	1.79	418	1.55	539	0.95	313	2.1	517	1.55	620	1.2
39	mouth	1	2	canoa	0	868	25	5	679	0.59	688	0.33	440	2.13	335	1.18	600	1.14	114	0.36	288	1.57
39	hand	1	2	circo	0	780	43	5	616	1.16	660	0.74	453	1.83	228	0.63	626	0.92	179	0.88	205	1
39	hand	1	1	circostanza	0	723	70	11	273	1.7	228	1.49	412	1.73	479	1.23	331	2.09	485	1.31	642	0.61
39	mouth	1	1	concetto	0	669	118	8	168	0.99	224	1.5	509	1.69	426	0.92	315	2.06	635	1.3	544	1.71
39	mouth	1	3	conflitto	1		140	9	304	1.25	348	1.81	416	2.19	444	1.15	432	1.87	424	1.1	553	1.39
39	hand	1	2	cravatta	0	680	38	8	694	0.24	688	0.44	552	1.87	250	0.93	675	0.58	105	0.22	200	1.2
39	mouth	1	3	disperazione	0	775	101	12	311	1.55	428	1.74	505	1.61	389	1.35	501	1.86	459	1.43	427	1.96
39	mouth	1	2	elefante	0	823	36	8	669	0.6	695	0.23	482	1.77	210	0.79	618	1.45	100	0	296	1.9
39	hand	1	3	emergenza	0	918	161	9	315	1.64	348	1.9	500	1.6	400	1.21	474	1.88	456	1.37	509	1.42
39	mouth	1	2	falce	0	787	5	5	662	0.82	632	1.3	387	1.85	365	1.04	575	1.7	129	0.56	288	1.32
39	mouth	1	3	fallimento	0	748	99	10	344	1.59	263	1.74	455	1.8	420	1.28	400	1.94	450	1.69	520	1.85
39	mouth	1	1	fascino	0	859	149	7	246	1.56	430	1.33	495	1.75	475	1.18	476	1.83	535	1.28	550	1.44
39	mouth	1	2	flotta	0	613	35	6	600	1.2	644	0.75	442	1.71	330	0.95	582	1.66	163	0.72	375	1.9
39	hand	1	3	fremito	0	786	11	7	335	1.79	312	1.84	273	1.33	516	1.26	304	2.03	390	1.95	600	1.44
39	hand	1	1	funzione	0	1120	185	8	273	1.33	274	1.97	414	1.34	420	1.64	341	1.89	465	1.86	592	1.5
39	mouth	1	2	gallo	0	1022	12	5	700	0	695	0.23	486	1.74	215	0.75	600	1.39	112	0.54	212	1.48
39	hand	1	2	giraffa	0	679	1	7	681	0.49	674	0.69	463	2.39	181	0.54	644	1.42	106	0.24	306	1.78
39	hand	1	3	giuramento	0	713	13	10	309	1.5	344	1.91	393	1.44	400	1.12	417	1.76	400	1.9	553	1.21
39	mouth	1	3	impulso	0	648	50	7	300	1.63	300	1.89	437	1.92	452	1.28	338	1.84	506	1	463	1.56
39	hand	1	1	indiscrezione	0	858	16	13	188	0.99	191	1.16	395	1.9	556	1.15	303	1.71	562	1.26	616	1.49
39	hand	1	1	inefficienza	0	1161	17	12	245	1.3	274	1.56	418	1.87	521	1.14	345	1.88	515	1.69	563	1.71
39	hand	1	1	inesperienza	0	1249	5	12	232	1.19	220	1.42	427	1.83	458	1.32	355	1.77	550	1.48	556	1.54
39	mouth	1	1	insufficienza	0	683	15	13	265	1.67	230	1.55	416	2.03	363	1.2	388	2.09	526	1.42	503	1.49
39	mouth	1	3	ira	0	621	45	3	296	1.43	391	1.98	395	2.07	400	1.21	382	1.71	474	1.42	491	1.55
39	mouth	1	1	logica	0	606	107	6	220	1.42	195	1.43	536	1.38	435	1.42	362	1.92	559	1.33	580	1.76
39	mouth	1	1	merito	0	781	141	6	232	1.38	235	1.67	489	1.41	352	1.23	382	1.82	556	1.5	450	1.81
39	mouth	1	2	minerale	1		9	8	627	0.88	538	1.46	447	1.71	396	1	505	2.09	174	1.08	388	1.26
39	mouth	1	2	oca	0	737	29	3	685	0.54	700	0	468	2.21	150	0.52	659	1.08	106	0.24	197	1.33
39	mouth	1	3	orrore	0	1075	77	6	305	1.29	356	1.74	491	1.78	400	1.38	475	1.8	450	1.71	363	1.71
39	hand	1	1	ozio	0	1056	9	4	268	1.43	384	1.91	445	1.99	450	1.33	494	1.69	480	1.79	568	0.95
39	hand	1	2	palude	0	736	12	6	645	0.77	613	1.13	332	1.93	341	0.95	578	1.65	175	0.9	310	2.05
39	hand	1	3	pericolo	0	634	250	8	323	1.5	361	1.85	511	1.85	231	0.7	506	1.77	394	1.37	397	1.51
39	mouth	1	1	reputazione	0	726	27	11	215	1.01	213	1.39	411	1.76	569	0.95	282	1.85	594	1.2	619	1
39	mouth	1	3	stupore	0	701	62	7	339	1.61	440	1.68	515	1.37	366	1.18	422	1.83	496	1.55	500	1.69
39	hand	1	2	telegrafo	0	707	3	9	614	1.46	556	1.44	321	1.75	438	1.28	455	2.35	153	1.24	531	1.25
39	hand	1	1	tendenza	0	972	161	8	169	0.87	184	1.12	455	1.9	530	1.69	294	1.76	591	1.4	604	1.06
39	hand	1	3	terrore	0	1156	96	7	297	1.38	408	1.87	421	1.93	326	1.08	488	1.71	455	1.7	463	2.11
39	hand	1	2	torre	0	743	44	5	656	0.63	674	0.45	423	2.02	245	0.89	579	1.63	129	0.76	228	1.59
39	hand	1	3	tradimento	0	867	73	10	363	1.2	300	1.83	464	2.05	415	1.18	485	1.88	418	1.49	432	2.04
39	hand	1	2	trattore	0	699	2	8	685	0.44	672	0.74	482	2.11	209	0.75	669	0.6	105	0.22	216	1.68
39	mouth	1	1	unanimità	1		37	8	241	1.46	308	2.1	306	1.6	512	1.25	369	1.62	545	1.73	632	1.11
40	mouth	1	3	abbandono	0	574	91	9	297	1.55	300	1.73	397	1.79	374	1.52	413	1.71	455	1.93	505	1.65
40	mouth	1	1	affermazione	0	576	59	12	274	1.85	265	1.76	516	1.38	424	1.09	376	1.86	375	1.61	425	1.56
40	hand	1	3	agitazione	0	706	25	10	413	1.5	311	1.56	541	1.75	320	1.44	497	1.82	441	1.54	364	2.04
40	hand	1	3	agonia	0	871	29	6	294	1.39	332	1.6	305	1.42	480	1.51	444	1.99	476	1.69	600	1.32
40	hand	1	2	alghe	0	537	24	5	669	0.62	657	0.73	422	1.93	269	0.6	641	1.48	121	0.54	225	1.34
40	mouth	1	2	alveare	0	659	11	7	679	0.42	674	0.57	421	2.32	267	1.02	609	1.44	150	0.73	363	1.74
40	hand	1	1	analogia	0	605	8	8	206	1.34	327	1.79	418	1.55	539	0.95	313	2.1	517	1.55	620	1.2
40	mouth	1	2	canoa	0	562	25	5	679	0.59	688	0.33	440	2.13	335	1.18	600	1.14	114	0.36	288	1.57
40	hand	1	2	circo	0	597	43	5	616	1.16	660	0.74	453	1.83	228	0.63	626	0.92	179	0.88	205	1
40	hand	1	1	circostanza	0	827	70	11	273	1.7	228	1.49	412	1.73	479	1.23	331	2.09	485	1.31	642	0.61
40	mouth	1	1	concetto	0	543	118	8	168	0.99	224	1.5	509	1.69	426	0.92	315	2.06	635	1.3	544	1.71
40	mouth	1	3	conflitto	0	653	140	9	304	1.25	348	1.81	416	2.19	444	1.15	432	1.87	424	1.1	553	1.39
40	hand	1	2	cravatta	0	631	38	8	694	0.24	688	0.44	552	1.87	250	0.93	675	0.58	105	0.22	200	1.2
40	mouth	1	3	disperazione	0	644	101	12	311	1.55	428	1.74	505	1.61	389	1.35	501	1.86	459	1.43	427	1.96
40	mouth	1	2	elefante	0	616	36	8	669	0.6	695	0.23	482	1.77	210	0.79	618	1.45	100	0	296	1.9
40	hand	1	3	emergenza	0	585	161	9	315	1.64	348	1.9	500	1.6	400	1.21	474	1.88	456	1.37	509	1.42
40	mouth	1	2	falce	0	590	5	5	662	0.82	632	1.3	387	1.85	365	1.04	575	1.7	129	0.56	288	1.32
40	mouth	1	3	fallimento	0	571	99	10	344	1.59	263	1.74	455	1.8	420	1.28	400	1.94	450	1.69	520	1.85
40	mouth	1	1	fascino	0	655	149	7	246	1.56	430	1.33	495	1.75	475	1.18	476	1.83	535	1.28	550	1.44
40	mouth	1	2	flotta	0	653	35	6	600	1.2	644	0.75	442	1.71	330	0.95	582	1.66	163	0.72	375	1.9
40	hand	1	3	fremito	0	581	11	7	335	1.79	312	1.84	273	1.33	516	1.26	304	2.03	390	1.95	600	1.44
40	hand	1	1	funzione	0	557	185	8	273	1.33	274	1.97	414	1.34	420	1.64	341	1.89	465	1.86	592	1.5
40	mouth	1	2	gallo	0	749	12	5	700	0	695	0.23	486	1.74	215	0.75	600	1.39	112	0.54	212	1.48
40	hand	1	2	giraffa	0	549	1	7	681	0.49	674	0.69	463	2.39	181	0.54	644	1.42	106	0.24	306	1.78
40	hand	1	3	giuramento	0	585	13	10	309	1.5	344	1.91	393	1.44	400	1.12	417	1.76	400	1.9	553	1.21
40	mouth	1	3	impulso	0	617	50	7	300	1.63	300	1.89	437	1.92	452	1.28	338	1.84	506	1	463	1.56
40	hand	1	1	indiscrezione	0	583	16	13	188	0.99	191	1.16	395	1.9	556	1.15	303	1.71	562	1.26	616	1.49
40	hand	1	1	inefficienza	0	649	17	12	245	1.3	274	1.56	418	1.87	521	1.14	345	1.88	515	1.69	563	1.71
40	hand	1	1	inesperienza	0	647	5	12	232	1.19	220	1.42	427	1.83	458	1.32	355	1.77	550	1.48	556	1.54
40	mouth	1	1	insufficienza	0	529	15	13	265	1.67	230	1.55	416	2.03	363	1.2	388	2.09	526	1.42	503	1.49
40	mouth	1	3	ira	0	663	45	3	296	1.43	391	1.98	395	2.07	400	1.21	382	1.71	474	1.42	491	1.55
40	mouth	1	1	logica	1		107	6	220	1.42	195	1.43	536	1.38	435	1.42	362	1.92	559	1.33	580	1.76
40	mouth	1	1	merito	0	646	141	6	232	1.38	235	1.67	489	1.41	352	1.23	382	1.82	556	1.5	450	1.81
40	mouth	1	2	minerale	0	680	9	8	627	0.88	538	1.46	447	1.71	396	1	505	2.09	174	1.08	388	1.26
40	mouth	1	2	oca	0	765	29	3	685	0.54	700	0	468	2.21	150	0.52	659	1.08	106	0.24	197	1.33
40	mouth	1	3	orrore	0	900	77	6	305	1.29	356	1.74	491	1.78	400	1.38	475	1.8	450	1.71	363	1.71
40	hand	1	1	ozio	0	694	9	4	268	1.43	384	1.91	445	1.99	450	1.33	494	1.69	480	1.79	568	0.95
40	hand	1	2	palude	0	561	12	6	645	0.77	613	1.13	332	1.93	341	0.95	578	1.65	175	0.9	310	2.05
40	hand	1	3	pericolo	0	662	250	8	323	1.5	361	1.85	511	1.85	231	0.7	506	1.77	394	1.37	397	1.51
40	mouth	1	1	reputazione	0	885	27	11	215	1.01	213	1.39	411	1.76	569	0.95	282	1.85	594	1.2	619	1
40	mouth	1	3	stupore	0	715	62	7	339	1.61	440	1.68	515	1.37	366	1.18	422	1.83	496	1.55	500	1.69
40	hand	1	2	telegrafo	0	605	3	9	614	1.46	556	1.44	321	1.75	438	1.28	455	2.35	153	1.24	531	1.25
40	hand	1	1	tendenza	0	648	161	8	169	0.87	184	1.12	455	1.9	530	1.69	294	1.76	591	1.4	604	1.06
40	hand	1	3	terrore	0	532	96	7	297	1.38	408	1.87	421	1.93	326	1.08	488	1.71	455	1.7	463	2.11
40	hand	1	2	torre	0	554	44	5	656	0.63	674	0.45	423	2.02	245	0.89	579	1.63	129	0.76	228	1.59
40	hand	1	3	tradimento	0	554	73	10	363	1.2	300	1.83	464	2.05	415	1.18	485	1.88	418	1.49	432	2.04
40	hand	1	2	trattore	0	557	2	8	685	0.44	672	0.74	482	2.11	209	0.75	669	0.6	105	0.22	216	1.68
40	mouth	1	1	unanimità	0	583	37	8	241	1.46	308	2.1	306	1.6	512	1.25	369	1.62	545	1.73	632	1.11
1	hand	2	3	abbandono	1		161	8	169	0.87	184	1.12	455	1.9	530	1.69	294	1.76	591	1.4	604	1.06
1	hand	2	1	affermazione	1		45	3	296	1.43	391	1.98	395	2.07	400	1.21	382	1.71	474	1.42	491	1.55
1	mouth	2	3	agitazione	0	1318	185	8	273	1.33	274	1.97	414	1.34	420	1.64	341	1.89	465	1.86	592	1.5
1	hand	2	3	agonia	1		2	8	685	0.44	672	0.74	482	2.11	209	0.75	669	0.6	105	0.22	216	1.68
1	mouth	2	2	alghe	0	1019	101	12	311	1.55	428	1.74	505	1.61	389	1.35	501	1.86	459	1.43	427	1.96
1	mouth	2	2	alveare	0	1103	161	9	315	1.64	348	1.9	500	1.6	400	1.21	474	1.88	456	1.37	509	1.42
1	mouth	2	1	analogia	1		24	5	669	0.62	657	0.73	422	1.93	269	0.6	641	1.48	121	0.54	225	1.34
1	hand	2	2	canoa	1		141	6	232	1.38	235	1.67	489	1.41	352	1.23	382	1.82	556	1.5	450	1.81
1	hand	2	2	circo	0	1238	27	11	215	1.01	213	1.39	411	1.76	569	0.95	282	1.85	594	1.2	619	1
1	hand	2	1	circostanza	1		17	12	245	1.3	274	1.56	418	1.87	521	1.14	345	1.88	515	1.69	563	1.71
1	mouth	2	1	concetto	0	972	29	6	294	1.39	332	1.6	305	1.42	480	1.51	444	1.99	476	1.69	600	1.32
1	mouth	2	3	conflitto	0	1261	99	10	344	1.59	263	1.74	455	1.8	420	1.28	400	1.94	450	1.69	520	1.85
1	hand	2	2	cravatta	0	821	9	8	627	0.88	538	1.46	447	1.71	396	1	505	2.09	174	1.08	388	1.26
1	hand	2	3	disperazione	1		3	9	614	1.46	556	1.44	321	1.75	438	1.28	455	2.35	153	1.24	531	1.25
1	mouth	2	2	elefante	0	701	38	8	694	0.24	688	0.44	552	1.87	250	0.93	675	0.58	105	0.22	200	1.2
1	mouth	2	3	emergenza	0	818	5	5	662	0.82	632	1.3	387	1.85	365	1.04	575	1.7	129	0.56	288	1.32
1	hand	2	2	falce	1		250	8	323	1.5	361	1.85	511	1.85	231	0.7	506	1.77	394	1.37	397	1.51
1	mouth	2	3	fallimento	1		35	6	600	1.2	644	0.75	442	1.71	330	0.95	582	1.66	163	0.72	375	1.9
1	mouth	2	1	fascino	1		25	5	679	0.59	688	0.33	440	2.13	335	1.18	600	1.14	114	0.36	288	1.57
1	mouth	2	2	flotta	1		140	9	304	1.25	348	1.81	416	2.19	444	1.15	432	1.87	424	1.1	553	1.39
1	hand	2	3	fremito	1		37	8	241	1.46	308	2.1	306	1.6	512	1.25	369	1.62	545	1.73	632	1.11
1	hand	2	1	funzione	0	867	50	7	300	1.63	300	1.89	437	1.92	452	1.28	338	1.84	506	1	463	1.56
1	hand	2	2	gallo	0	1235	77	6	305	1.29	356	1.74	491	1.78	400	1.38	475	1.8	450	1.71	363	1.71
1	mouth	2	2	giraffa	0	770	43	5	616	1.16	660	0.74	453	1.83	228	0.63	626	0.92	179	0.88	205	1
1	mouth	2	3	giuramento	0	1105	1	7	681	0.49	674	0.69	463	2.39	181	0.54	644	1.42	106	0.24	306	1.78
1	hand	2	3	impulso	1		96	7	297	1.38	408	1.87	421	1.93	326	1.08	488	1.71	455	1.7	463	2.11
1	mouth	2	1	indiscrezione	1		11	7	679	0.42	674	0.57	421	2.32	267	1.02	609	1.44	150	0.73	363	1.74
1	hand	2	1	inefficienza	0	966	15	13	265	1.67	230	1.55	416	2.03	363	1.2	388	2.09	526	1.42	503	1.49
1	mouth	2	1	inesperienza	0	779	59	12	274	1.85	265	1.76	516	1.38	424	1.09	376	1.86	375	1.61	425	1.56
1	mouth	2	1	insufficienza	1		8	8	206	1.34	327	1.79	418	1.55	539	0.95	313	2.1	517	1.55	620	1.2
1	mouth	2	3	ira	0	1105	149	7	246	1.56	430	1.33	495	1.75	475	1.18	476	1.83	535	1.28	550	1.44
1	hand	2	1	logica	1		107	6	220	1.42	195	1.43	536	1.38	435	1.42	362	1.92	559	1.33	580	1.76
1	hand	2	1	merito	1		5	12	232	1.19	220	1.42	427	1.83	458	1.32	355	1.77	550	1.48	556	1.54
1	hand	2	2	minerale	1		9	4	268	1.43	384	1.91	445	1.99	450	1.33	494	1.69	480	1.79	568	0.95
1	mouth	2	2	oca	1		118	8	168	0.99	224	1.5	509	1.69	426	0.92	315	2.06	635	1.3	544	1.71
1	hand	2	3	orrore	1		44	5	656	0.63	674	0.45	423	2.02	245	0.89	579	1.63	129	0.76	228	1.59
1	hand	2	1	ozio	0	832	13	10	309	1.5	344	1.91	393	1.44	400	1.12	417	1.76	400	1.9	553	1.21
1	mouth	2	2	palude	1		36	8	669	0.6	695	0.23	482	1.77	210	0.79	618	1.45	100	0	296	1.9
1	hand	2	3	pericolo	0	673	73	10	363	1.2	300	1.83	464	2.05	415	1.18	485	1.88	418	1.49	432	2.04
1	hand	2	1	reputazione	0	1197	16	13	188	0.99	191	1.16	395	1.9	556	1.15	303	1.71	562	1.26	616	1.49
1	mouth	2	3	stupore	1		11	7	335	1.79	312	1.84	273	1.33	516	1.26	304	2.03	390	1.95	600	1.44
1	hand	2	2	telegrafo	1		29	3	685	0.54	700	0	468	2.21	150	0.52	659	1.08	106	0.24	197	1.33
1	mouth	2	1	tendenza	1		91	9	297	1.55	300	1.73	397	1.79	374	1.52	413	1.71	455	1.93	505	1.65
1	hand	2	3	terrore	0	829	62	7	339	1.61	440	1.68	515	1.37	366	1.18	422	1.83	496	1.55	500	1.69
1	mouth	2	2	torre	1		70	11	273	1.7	228	1.49	412	1.73	479	1.23	331	2.09	485	1.31	642	0.61
1	mouth	2	3	tradimento	1		12	5	700	0	695	0.23	486	1.74	215	0.75	600	1.39	112	0.54	212	1.48
1	hand	2	2	trattore	0	879	12	6	645	0.77	613	1.13	332	1.93	341	0.95	578	1.65	175	0.9	310	2.05
1	mouth	2	1	unanimità	0	739	25	10	413	1.5	311	1.56	541	1.75	320	1.44	497	1.82	441	1.54	364	2.04
2	mouth	2	3	abbandono	1		12	5	700	0	695	0.23	486	1.74	215	0.75	600	1.39	112	0.54	212	1.48
2	mouth	2	1	affermazione	1		24	5	669	0.62	657	0.73	422	1.93	269	0.6	641	1.48	121	0.54	225	1.34
2	hand	2	3	agitazione	1		3	9	614	1.46	556	1.44	321	1.75	438	1.28	455	2.35	153	1.24	531	1.25
2	mouth	2	3	agonia	1		5	5	662	0.82	632	1.3	387	1.85	365	1.04	575	1.7	129	0.56	288	1.32
2	hand	2	2	alghe	1		27	11	215	1.01	213	1.39	411	1.76	569	0.95	282	1.85	594	1.2	619	1
2	hand	2	2	alveare	1		9	8	627	0.88	538	1.46	447	1.71	396	1	505	2.09	174	1.08	388	1.26
2	hand	2	1	analogia	0	1014	13	10	309	1.5	344	1.91	393	1.44	400	1.12	417	1.76	400	1.9	553	1.21
2	mouth	2	2	canoa	0		118	8	168	0.99	224	1.5	509	1.69	426	0.92	315	2.06	635	1.3	544	1.71
2	mouth	2	2	circo	0	674	101	12	311	1.55	428	1.74	505	1.61	389	1.35	501	1.86	459	1.43	427	1.96
2	mouth	2	1	circostanza	0	915	91	9	297	1.55	300	1.73	397	1.79	374	1.52	413	1.71	455	1.93	505	1.65
2	hand	2	1	concetto	0	936	50	7	300	1.63	300	1.89	437	1.92	452	1.28	338	1.84	506	1	463	1.56
2	hand	2	3	conflitto	0	1145	62	7	339	1.61	440	1.68	515	1.37	366	1.18	422	1.83	496	1.55	500	1.69
2	mouth	2	2	cravatta	0	959	70	11	273	1.7	228	1.49	412	1.73	479	1.23	331	2.09	485	1.31	642	0.61
2	mouth	2	3	disperazione	1		149	7	246	1.56	430	1.33	495	1.75	475	1.18	476	1.83	535	1.28	550	1.44
2	hand	2	2	elefante	1		12	6	645	0.77	613	1.13	332	1.93	341	0.95	578	1.65	175	0.9	310	2.05
2	hand	2	3	emergenza	1		73	10	363	1.2	300	1.83	464	2.05	415	1.18	485	1.88	418	1.49	432	2.04
2	mouth	2	2	falce	1		43	5	616	1.16	660	0.74	453	1.83	228	0.63	626	0.92	179	0.88	205	1
2	hand	2	3	fallimento	0	1014	96	7	297	1.38	408	1.87	421	1.93	326	1.08	488	1.71	455	1.7	463	2.11
2	hand	2	1	fascino	0	1136	107	6	220	1.42	195	1.43	536	1.38	435	1.42	362	1.92	559	1.33	580	1.76
2	hand	2	2	flotta	0	1072	29	3	685	0.54	700	0	468	2.21	150	0.52	659	1.08	106	0.24	197	1.33
2	mouth	2	3	fremito	1		185	8	273	1.33	274	1.97	414	1.34	420	1.64	341	1.89	465	1.86	592	1.5
2	mouth	2	1	funzione	0	810	11	7	679	0.42	674	0.57	421	2.32	267	1.02	609	1.44	150	0.73	363	1.74
2	mouth	2	2	gallo	1		36	8	669	0.6	695	0.23	482	1.77	210	0.79	618	1.45	100	0	296	1.9
2	hand	2	2	giraffa	1		141	6	232	1.38	235	1.67	489	1.41	352	1.23	382	1.82	556	1.5	450	1.81
2	hand	2	3	giuramento	0	689	161	8	169	0.87	184	1.12	455	1.9	530	1.69	294	1.76	591	1.4	604	1.06
2	mouth	2	3	impulso	1		99	10	344	1.59	263	1.74	455	1.8	420	1.28	400	1.94	450	1.69	520	1.85
2	hand	2	1	indiscrezione	0	923	15	13	265	1.67	230	1.55	416	2.03	363	1.2	388	2.09	526	1.42	503	1.49
2	mouth	2	1	inefficienza	0	762	25	10	413	1.5	311	1.56	541	1.75	320	1.44	497	1.82	441	1.54	364	2.04
2	hand	2	1	inesperienza	0	1021	16	13	188	0.99	191	1.16	395	1.9	556	1.15	303	1.71	562	1.26	616	1.49
2	hand	2	1	insufficienza	1		45	3	296	1.43	391	1.98	395	2.07	400	1.21	382	1.71	474	1.42	491	1.55
2	hand	2	3	ira	1		37	8	241	1.46	308	2.1	306	1.6	512	1.25	369	1.62	545	1.73	632	1.11
[truncated: 1,841 more rows]

## Sheet: Legend 
	Task: 1=Lexical Decision; 2= Recognition
	Concept: 1=abstract; 2=concrete; 3=emotional
	Covariates abbreviations:
	freq= Frequency
	n.lett=Number of Letters
	CNC=Concreteness
	CNCSd= Concreteness Standard Deviation
	IMG=Imageability
	IMGSd= Imageability Standard Deviation
	FAM= Familiarity
	FAMSd=Familiarity Standard Deviation
	AoA= Age of Acquisition
	AoASd= Age of Acquisition Standard Deviation
	CA= Context Availability
	CASd= Context Availability Standard Deviation
	ABS= Abstractness
	ABSSd= Abstractness Standard Deviation
	MoA= Modality of Acquisition
	MoASd= Modality of Acquisition Standard Deviation
